# Supplementary material
Source: PubMed Central journal article supplement (PMC8627179)
Supplement: NIHMS1758488-supplement-Supporting_Info.pdf [file NIHMS1758488-supplement-Supporting_Info.pdf]

## Supporting Information

# Sequential Norrish-Yang Cyclization and C–C Cleavage/Cross-Coupling of a [4.1.0] Fused Saturated Azacycle

Charis Amber Roberts,<sup>a, b</sup> Bohyun Park,<sup>a, c</sup> Li-Ping Xu,<sup>d</sup> Jose B. Roque,<sup>a</sup> Charles S. Yeung,<sup>e</sup>  
Djamaladdin G. Musaev,<sup>d\*</sup> Richmond Sarpong,<sup>a\*</sup> Rebecca Lyn LaLonde<sup>b\*</sup>

<sup>a</sup> Department of Chemistry, University of California, Berkeley, California 94720, United States.

<sup>b</sup> Chemistry Department, Reed College, Portland, Oregon 97202, United States.

<sup>c</sup> Department of Chemistry, Korea Advanced Institute of Science and Technology (KAIST), Daejeon 34141,  
Republic of Korea.

<sup>d</sup> Cherry L. Emerson Center for Scientific Computation, and Department of Chemistry, Emory University,  
Atlanta, Georgia 30322, United States.

<sup>e</sup> Disruptive Chemistry Fellow, Department of Discovery Chemistry, Merck & Co., Inc., 33 Avenue Louis  
Pasteur, Boston, Massachusetts 02115, United States.

\*[dmusaev@emory.edu](mailto:dmusaev@emory.edu)

\*[rsarpong@berkeley.edu](mailto:rsarpong@berkeley.edu)

\*[rlalonde@reed.edu](mailto:rlalonde@reed.edu)

## Table of Contents

|                                      |     |
|--------------------------------------|-----|
| Low-Temp Reaction Setup.....         | S3  |
| High-Throughput Experimentation..... | S4  |
| Experimental Spectra.....            | S5  |
| Crystallographic Data.....           | S19 |
| Computational Details.....           | S66 |

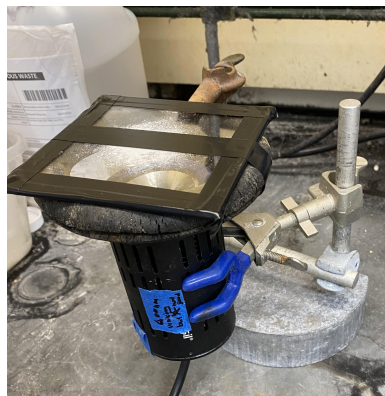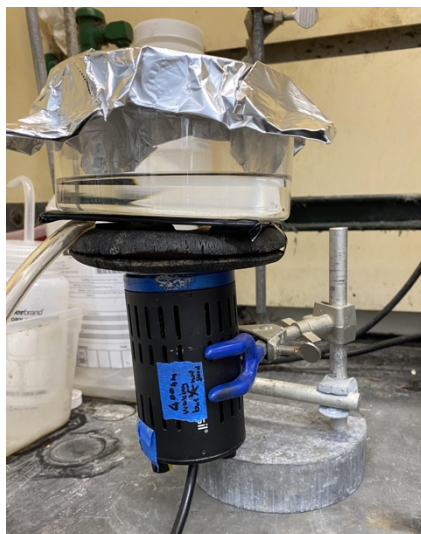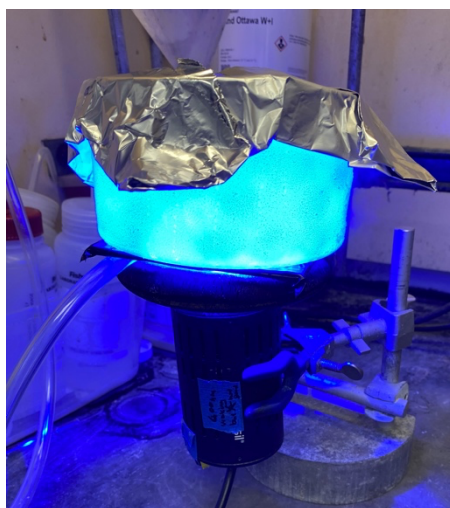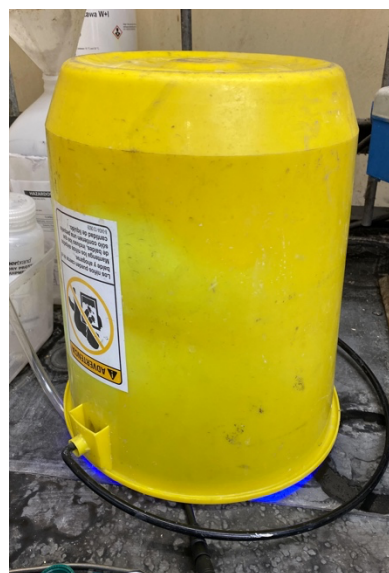

**Figure S1.** Low-temperature solid-state photoreaction set up for the conversion of **1** to **2a**.

## High-Throughput Experimentation (HTE) Catalyst Screening Protocol

To a 1 dram vial charged with a stir bar was added lactam **2a** (22.3 mg) and Cs<sub>2</sub>CO<sub>3</sub> (63.5 mg). The vial was brought into a glove box and toluene (859  $\mu$ L) and PhBr (23.0 mg) were added. The resulting suspension was vigorously stirred for 5–10 min until a milky suspension was formed. To each reaction well of a custom plated catalysis kit containing a 0.25  $\mu$ mol of commercially available palladium pre-catalysts (see below) was added 25  $\mu$ L of the suspension containing lactam **2a** (2.5 mg, 2.5  $\mu$ mol), Cs<sub>2</sub>CO<sub>3</sub> (1.6 mg, 5  $\mu$ mol), and PhBr (0.6 mg, 3.8  $\mu$ mol). The reaction block was sealed, and the catalysis kit was stirred (by action of a tumble stirrer) at 40 °C for 24 h. After cooling to rt, each reaction vial was analyzed by LCMS.

|                      |                        |                       |                              |                      |                      |
|----------------------|------------------------|-----------------------|------------------------------|----------------------|----------------------|
| XPhos-Pd-G2          | RuPhos-Pd-G2           | SPhos-Pd-G2           | water soluble<br>SPhos-Pd-G2 | tBuXPhos-Pd-<br>G3   | RockPhos-Pd-<br>G3   |
| BrettPhos-Pd-<br>G3  | tBuBrettPhos-<br>Pd-G3 | AdBrettPhos-<br>Pd-G3 | QPhos-Pd-G3                  | MorDalPhos-<br>Pd-G3 | APhos-Pd-G2          |
| Catacium A-<br>Pd-G2 | tBu3P-Pd-G2            | Cy3P-Pd-G2            | meCgPPh-Pd-<br>G3            | P(oTol)3-Pd-<br>G2   | PPh3-Pd-G2           |
| BINAP-Pd-G3          | DPPF-Pd-G3             | DTBPF-Pd-G3           | J009-Pd-G3                   | XantPhos-Pd-<br>G2   | N-XantPhos-<br>Pd-G3 |

The HTE screen afforded several hits as depicted in the following table showing conversion to what was later identified as compound **3b**.

|    |    |    |    |   |    |
|----|----|----|----|---|----|
| 0  | 0  | 0  | 0  | 0 | 0  |
| 0  | 0  | 0  | 80 | 0 | 76 |
| 79 | 60 | 0  | 0  | 0 | 0  |
| 0  | 0  | 67 | 0  | 0 | 0  |



# EXPERIMENTAL SPECTRA

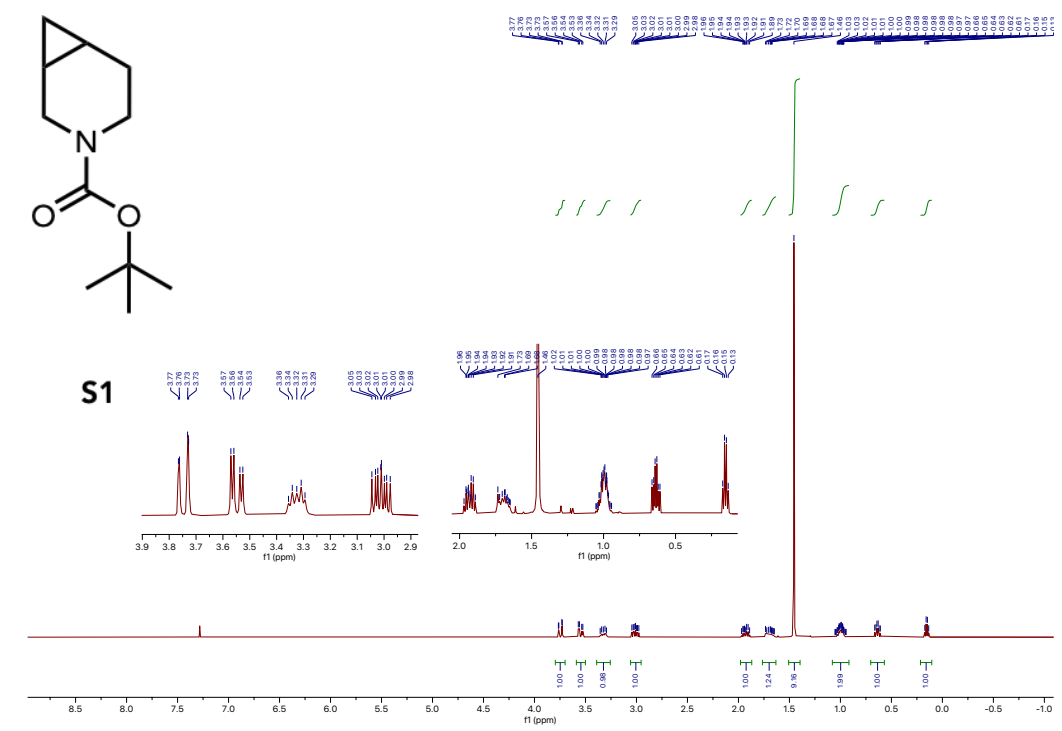

<sup>1</sup>H NMR of S1 in CDCl<sub>3</sub> @ 400 MHz.

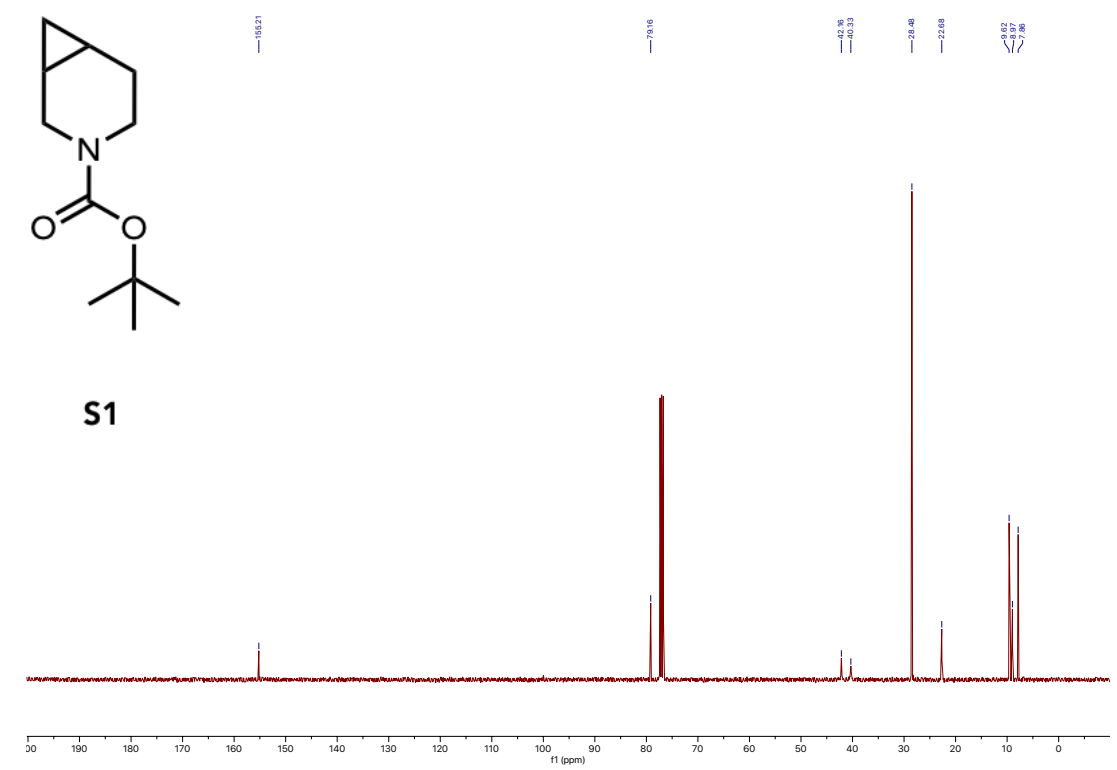

<sup>13</sup>C{<sup>1</sup>H} NMR of S1 in CDCl<sub>3</sub> @ 100 MHz.

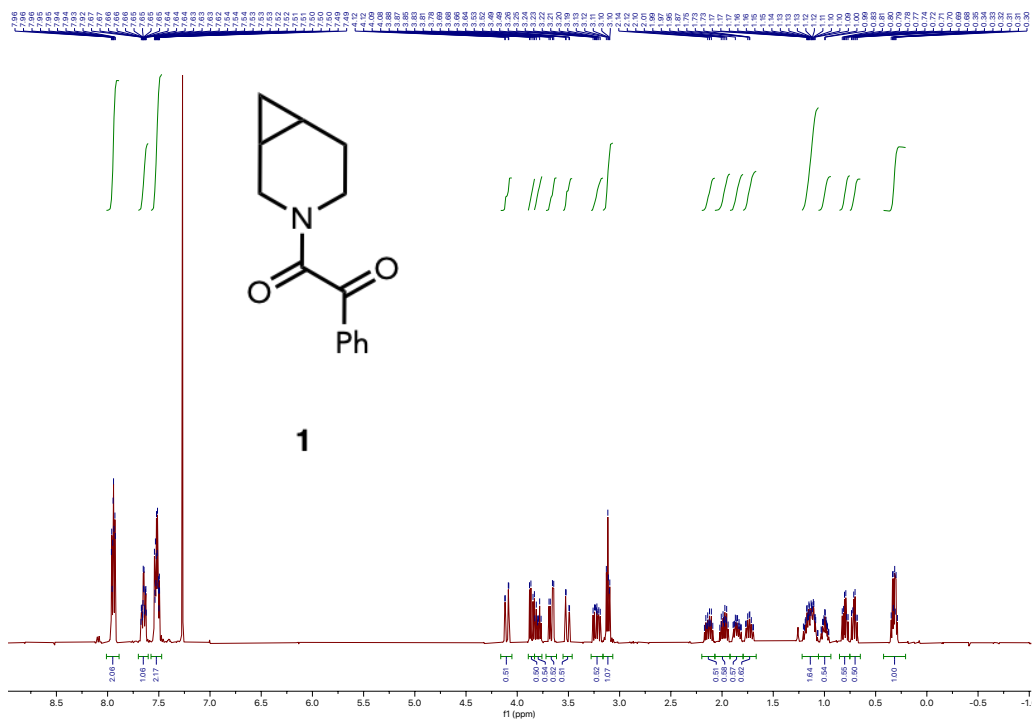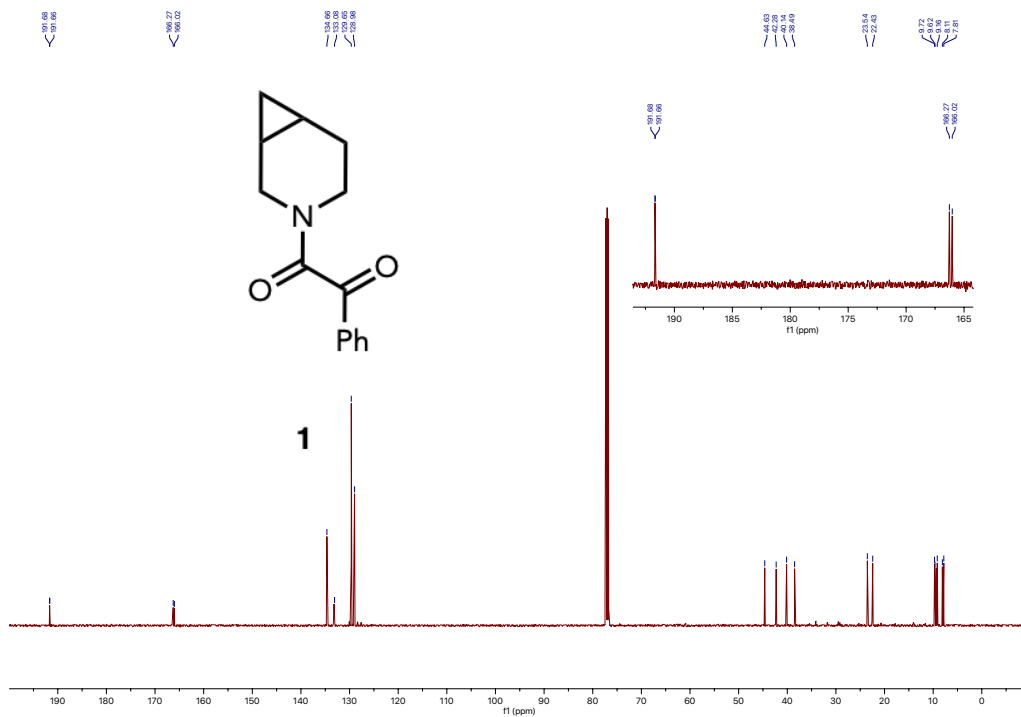

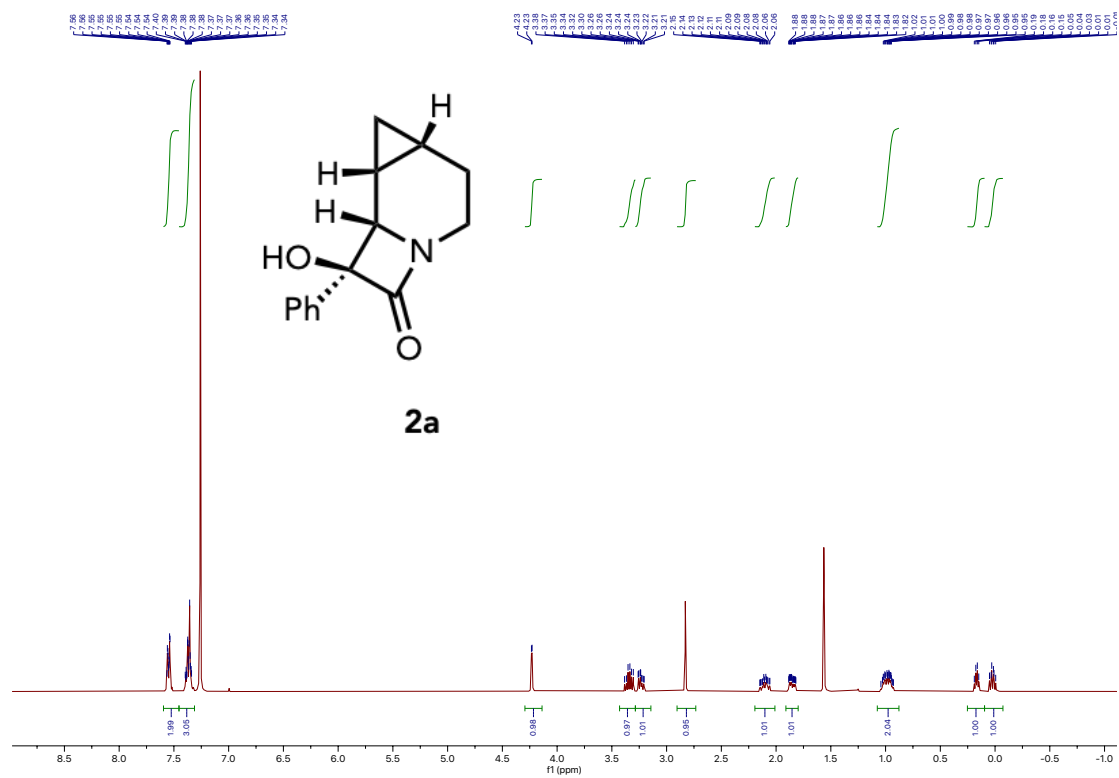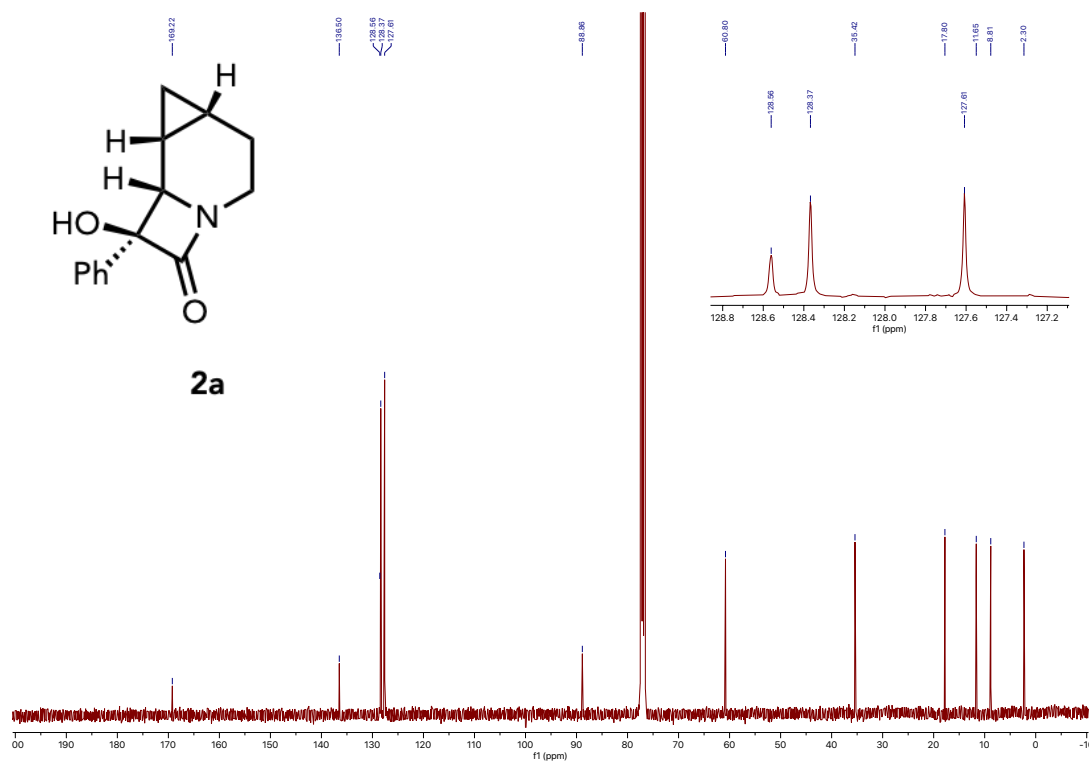

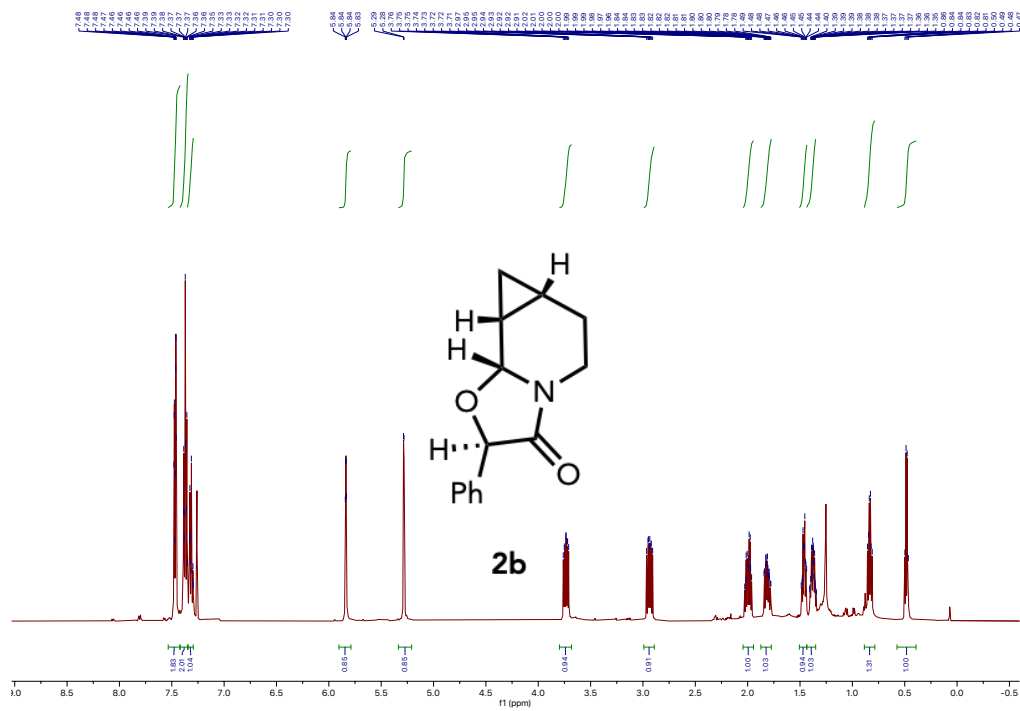

$^1\text{H}$  NMR of **2b** in  $\text{CDCl}_3$  @ 400 MHz.

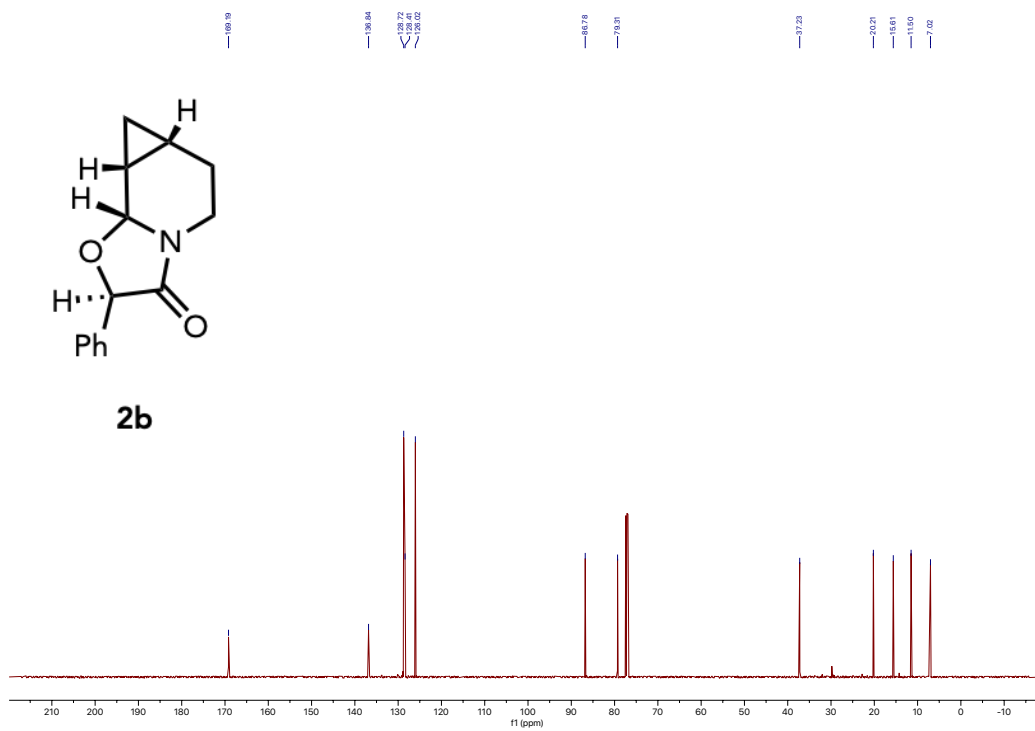

$^{13}\text{C}\{^1\text{H}\}$  NMR of **2b** in  $\text{CDCl}_3$  @ 100 MHz.

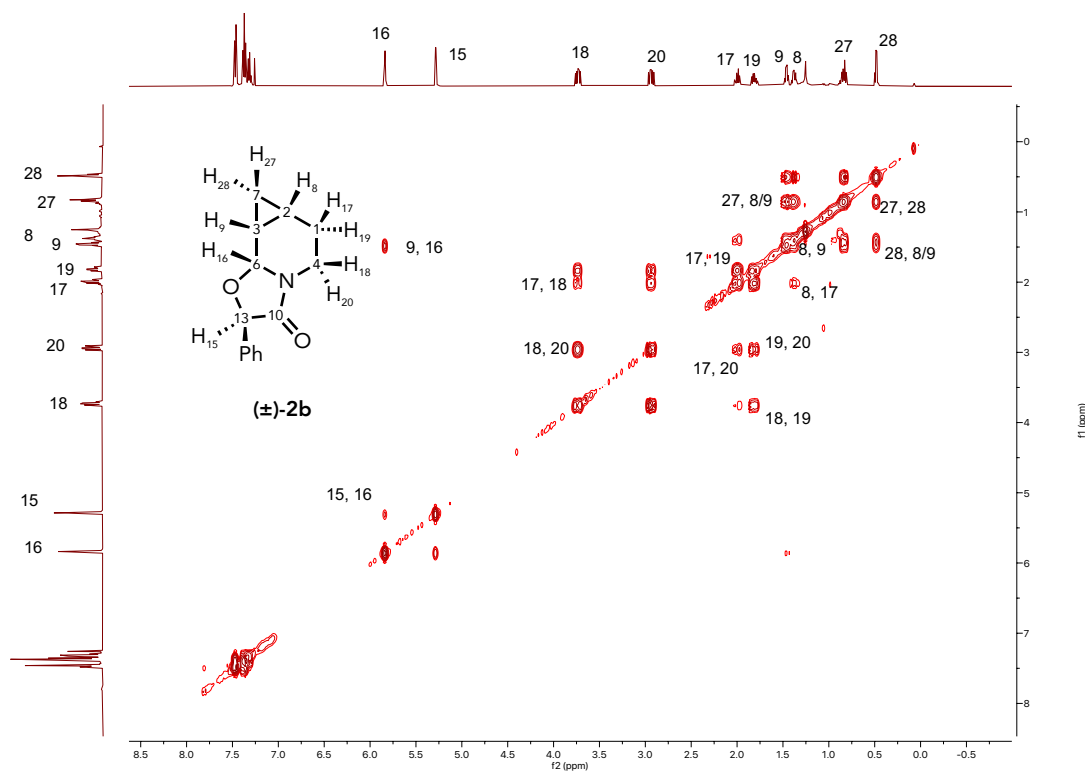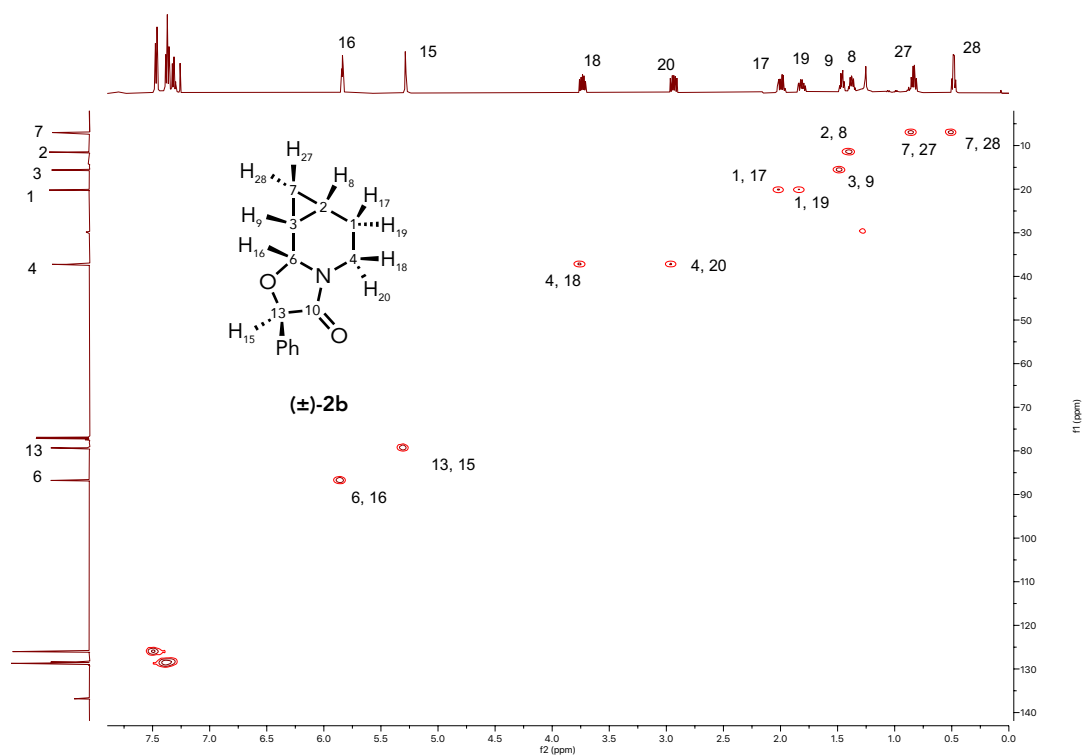

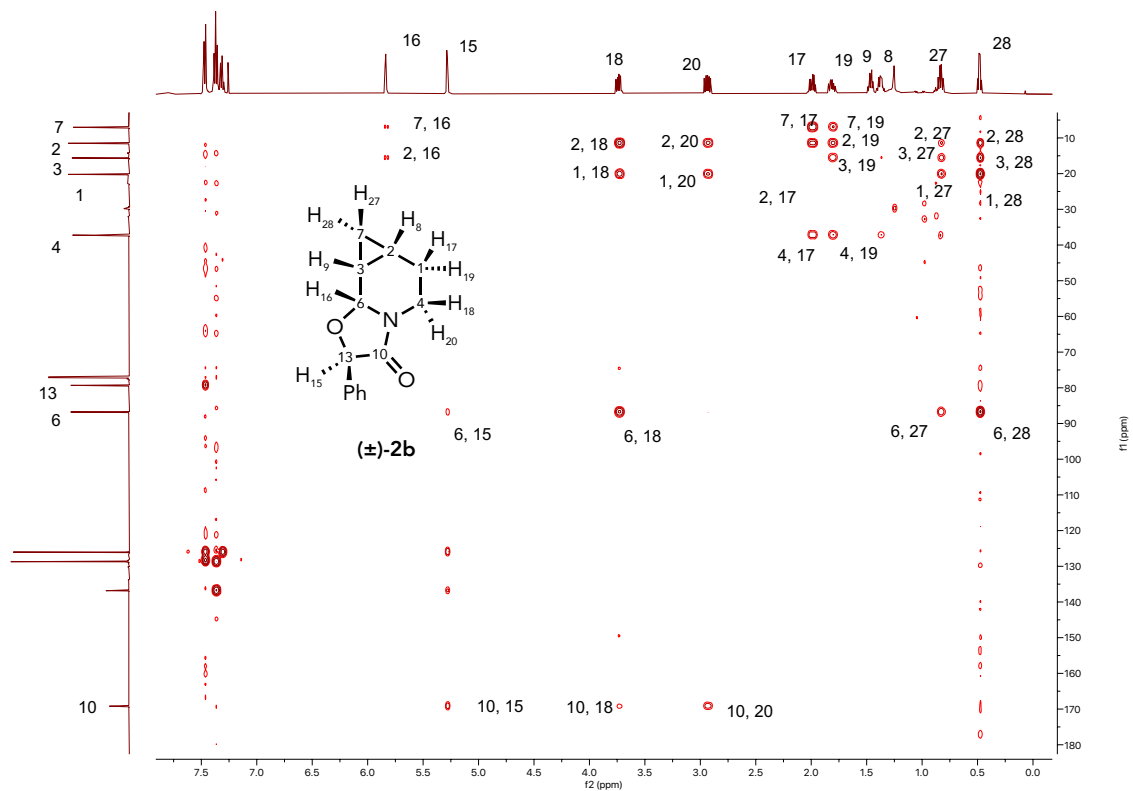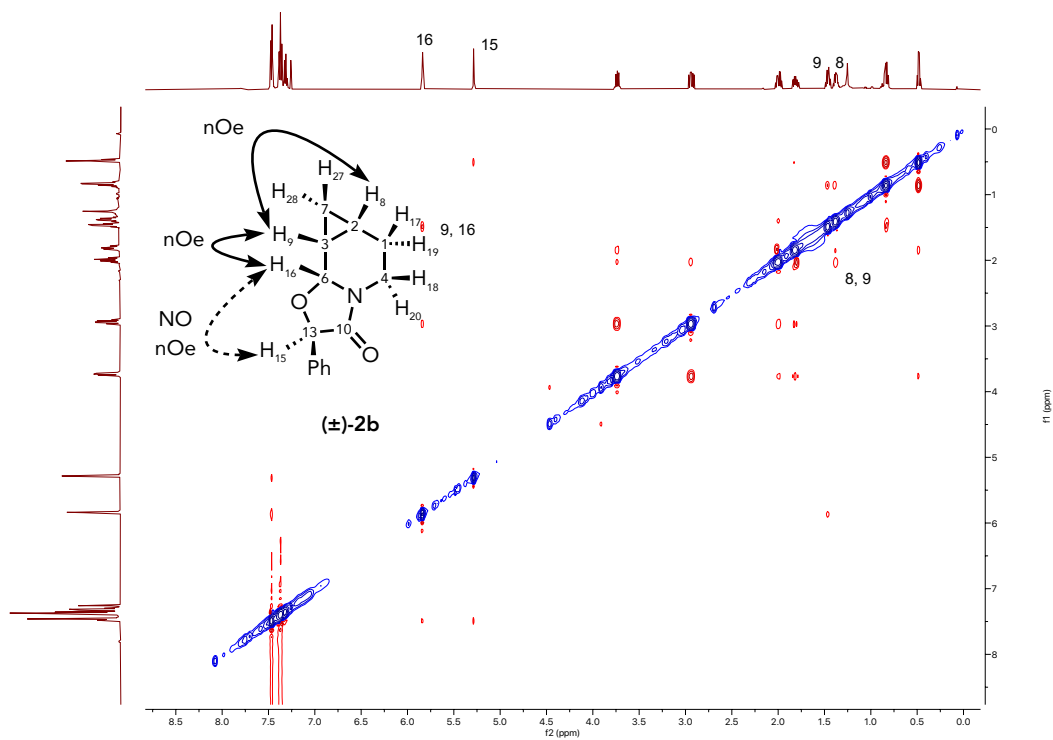



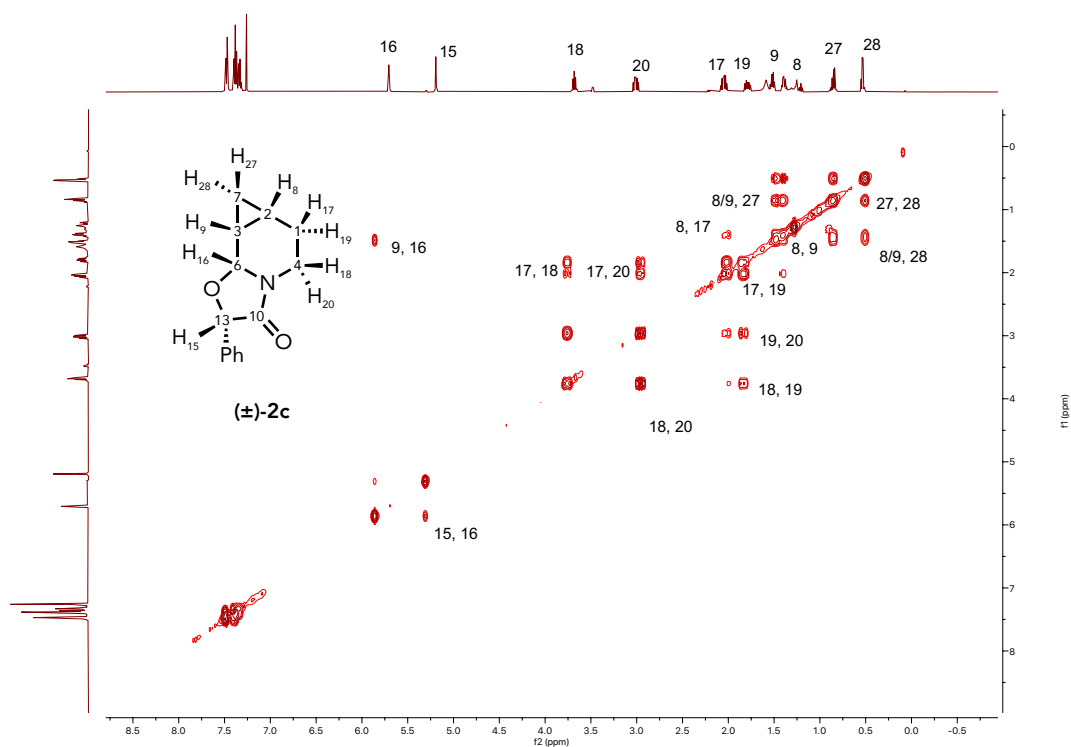

COSY of **2c** in CDCl<sub>3</sub> @ 400 MHz.

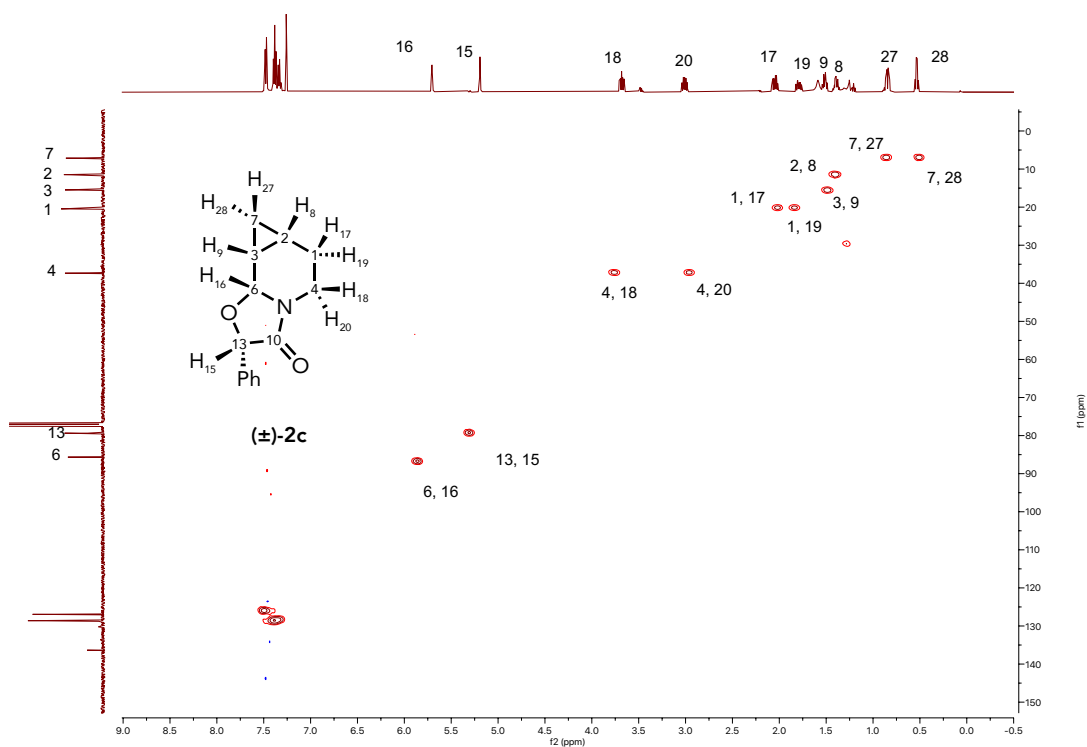

HSQC of **2c** in CDCl<sub>3</sub> @ 400 MHz.



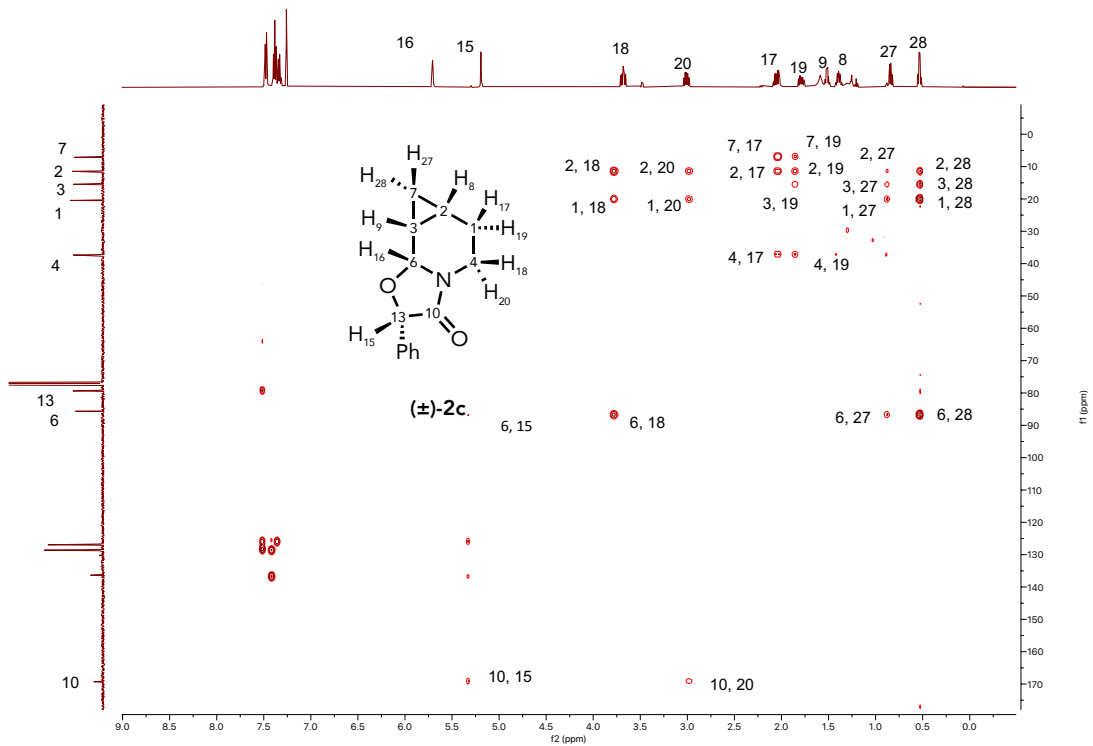

HMBC of **2c** in  $\text{CDCl}_3$  @ 400 MHz.

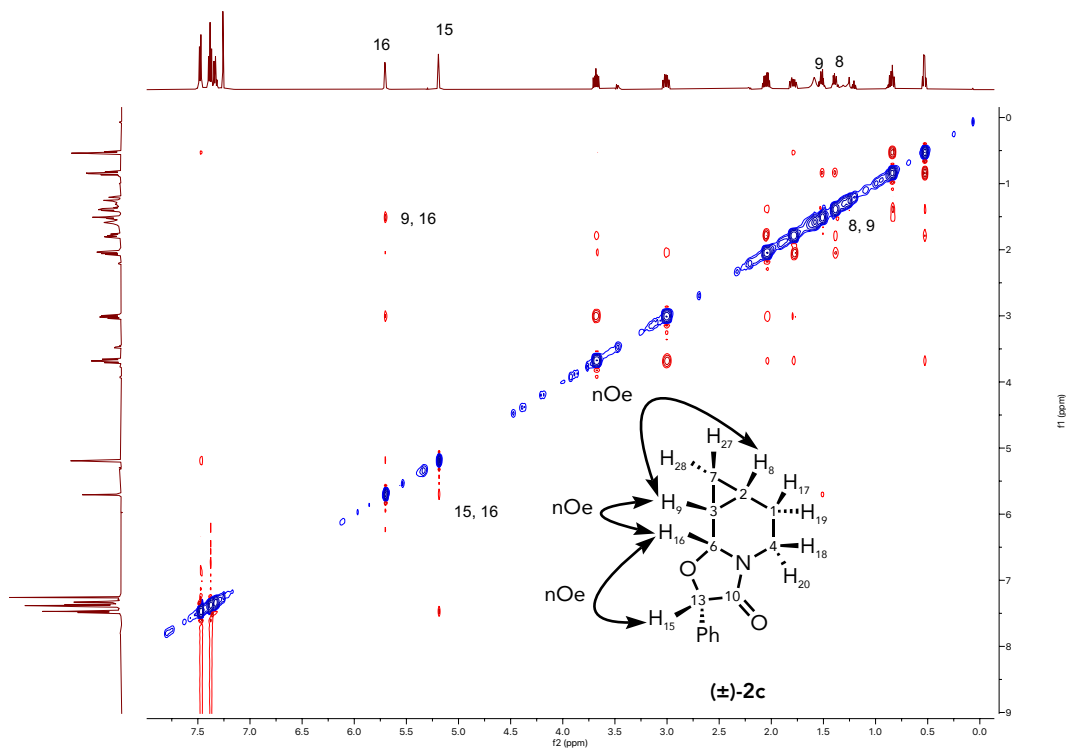

NOESY of **2c** in  $\text{CDCl}_3$  @ 400 MHz.

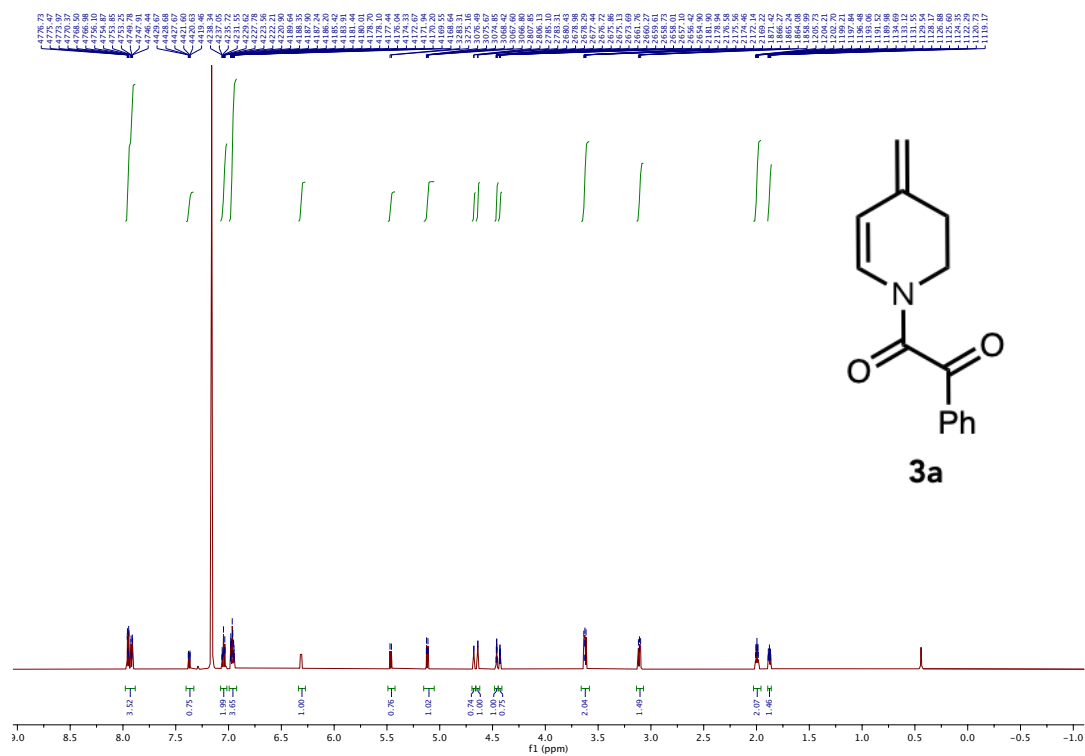

<sup>1</sup>H NMR spectrum of **3a** in C<sub>6</sub>D<sub>6</sub> (mixture of rotamers, 1: ~0.75) @ 600 MHz.

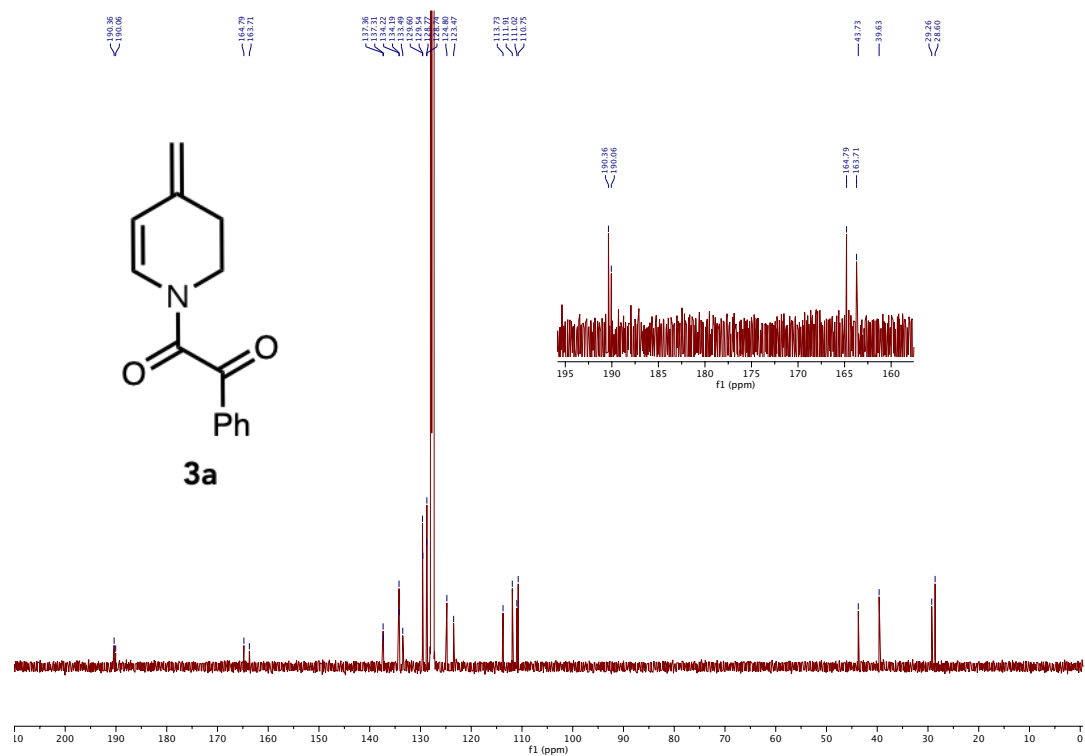

<sup>13</sup>C{<sup>1</sup>H} NMR spectrum of **3a** in C<sub>6</sub>D<sub>6</sub> @ 151 MHz.

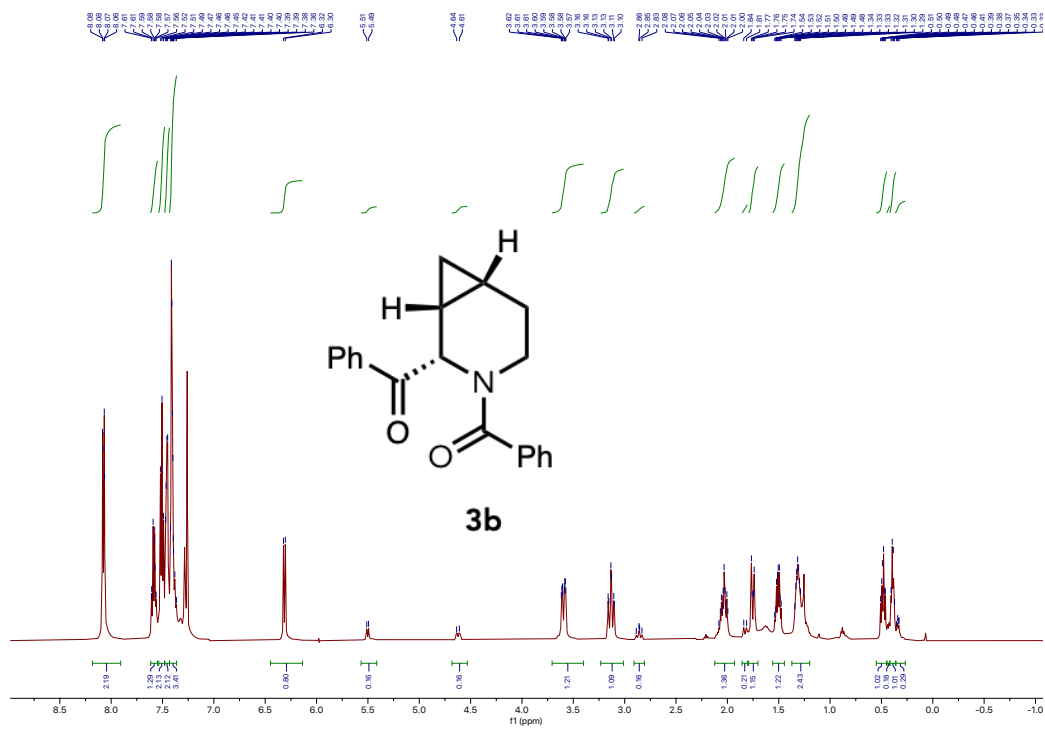

<sup>1</sup>H NMR of **3b** (1: ~0.2 mixture of rotamers) in CDCl<sub>3</sub> @ 500 MHz.

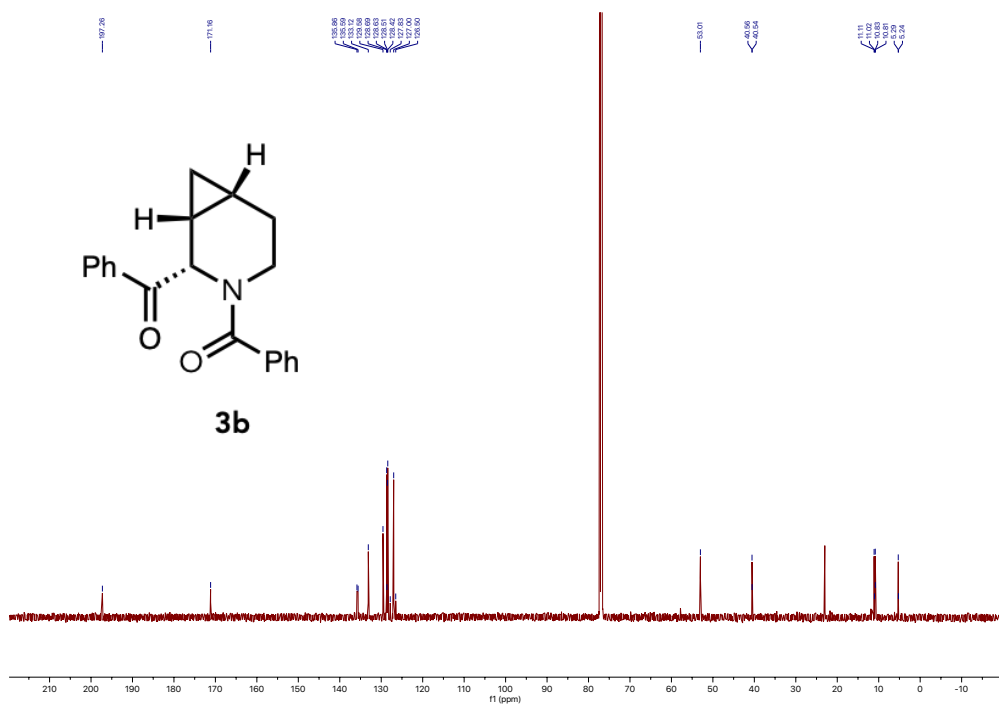

<sup>13</sup>C{<sup>1</sup>H} NMR of **3b** (1: ~0.2 mixture of rotamers) in CDCl<sub>3</sub> @ 126 MHz.



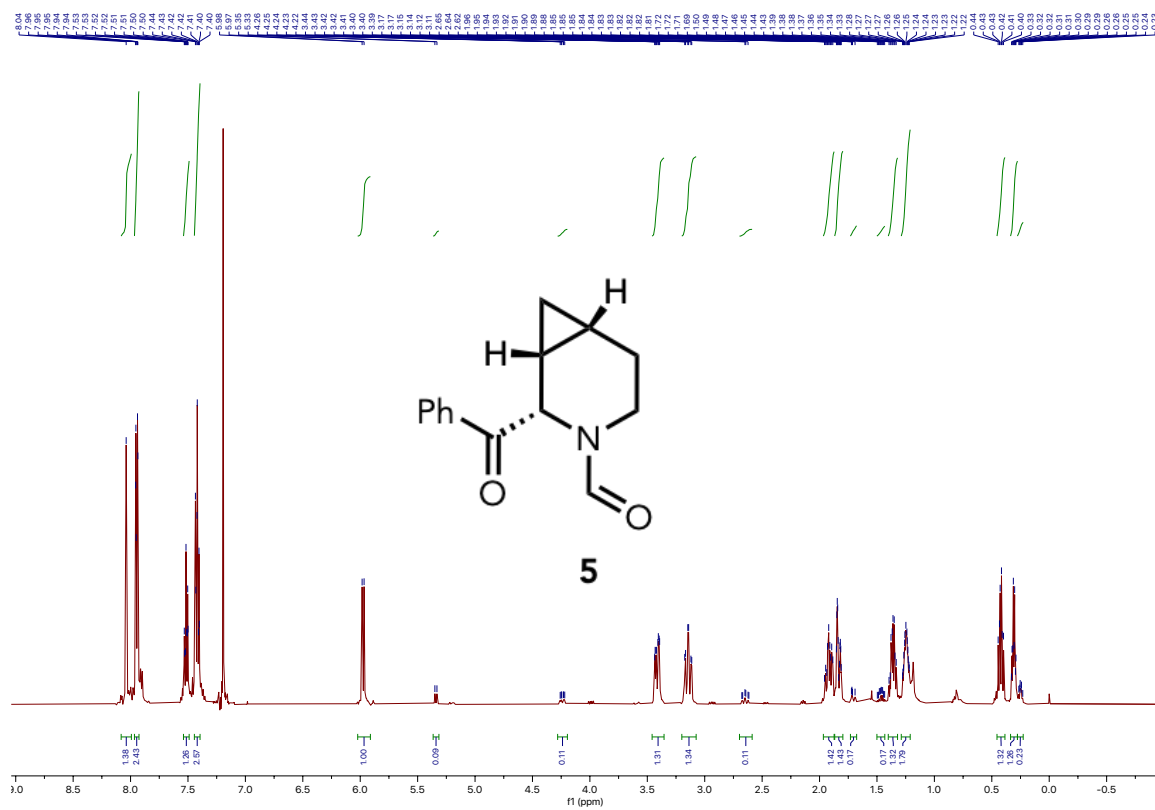

$^1\text{H}$  NMR of **5** (1: ~0.1 mixture of rotamers) in  $\text{CDCl}_3$  @ 500 MHz.

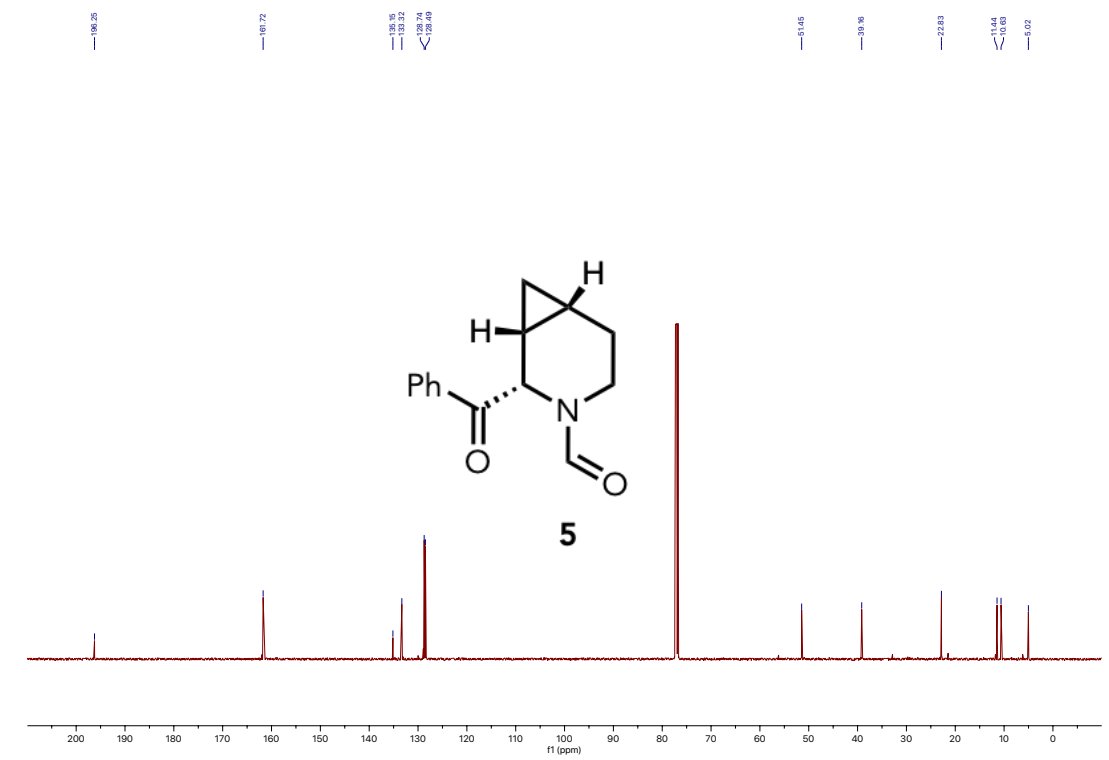

$^{13}\text{C}\{^1\text{H}\}$  NMR of **5** (1: ~0.1 mixture of rotamers) in  $\text{CDCl}_3$  @ 126 MHz.

## X-RAY CRYSTALLOGRAPHIC DATA AND METHODS

### REPRESENTATIVE PROCEDURE

A colorless block 0.18 x 0.06 x 0.05 mm in size was mounted on a Cryoloop with Paratone oil. Data were collected in a nitrogen gas stream at 100(2) K using omega scans. Crystal-to-detector distance was 30.23 mm and exposure time was 0.50 seconds per frame at low angles and 2.00 seconds at high angles, using a scan width of 0.5°. Data collection was 100% complete to 74.000° in  $\vartheta$ . A total of 14176 reflections were collected covering the indices  $-12 \leq h \leq 12$ ,  $-14 \leq k \leq 14$ ,  $-12 \leq l \leq 14$ . 2397 reflections were founded to be symmetry independent, with an  $R_{\text{int}}$  of 0.0447. Indexing and unit cell refinement indicated a primitive, monoclinic lattice. The space group was found to be P 21/c (No. 14). The data were integrated using the CrysAlis<sup>Pro</sup> 1.171.40.84a software program and scaled using the SCALE3 ABSPACK scaling algorithm. Solution by intrinsic phasing (SHELXT-2015) produced a heavy-atom phasing model consistent with the proposed structure. All non-hydrogen atoms were refined anisotropically by full-matrix least-squares (SHELXL-2014). All hydrogen atoms were placed using a riding model. Their positions were constrained relative to their parent atom using the appropriate HFIX command in SHELXL-2014.

## ORTEPS

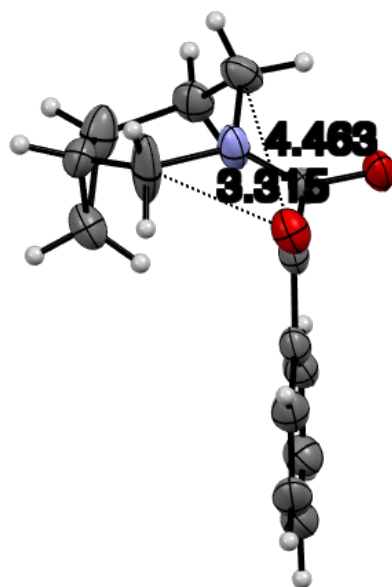

**Figure S2.** Single crystal XRD structure (major conformer shown, see CIF for more information) of **1**. Reacting methylene position is closer to the ketone carbonyl oxygen by  $\sim 1.1$  Å. Reactivity at this alpha position leads to the observed major site-isomer **2a**. Ortep drawn at 50% probability level. Minor conformer omitted for clarity.

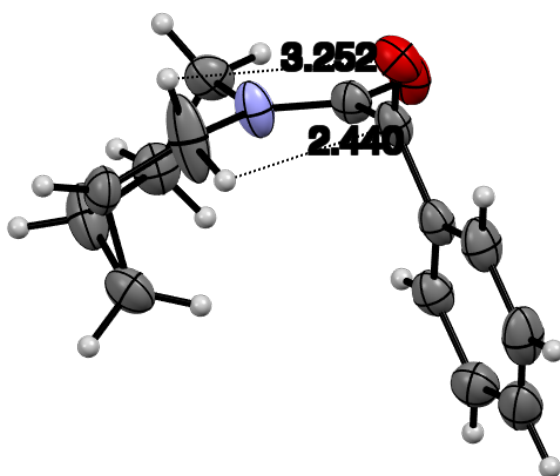

**Figure S3.** Single crystal XRD structure (major conformer shown) of **1**. Reacting C-H bond is  $\sim 0.8$  Å closer to the ketone carbonyl oxygen. Hydrogen atom-abstraction from this more proximal methylene C-H bond leads to the observed stereochemistry of the major product **2a**. Ortep drawn at 50% probability level. Minor conformer omitted for clarity.

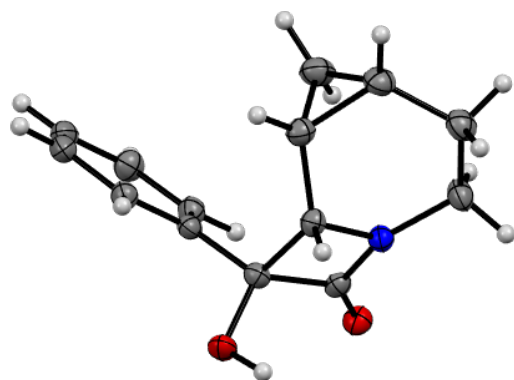

**Figure S4.** Single crystal XRD structure of compound **2a**. Ortep drawn at 50% probability level.

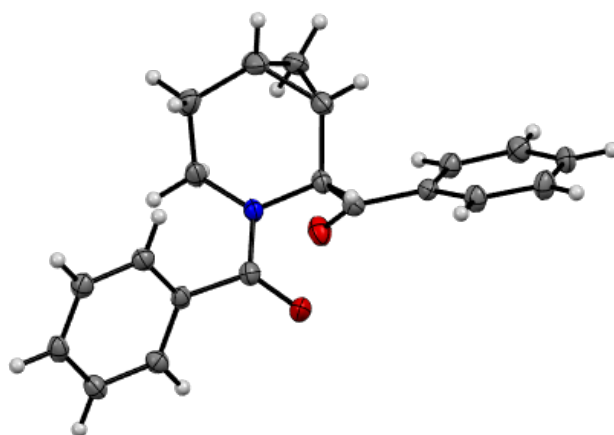

**Figure S5.** Single crystal XRD structure of compound **3b**. Ortep drawn at 50% probability level.



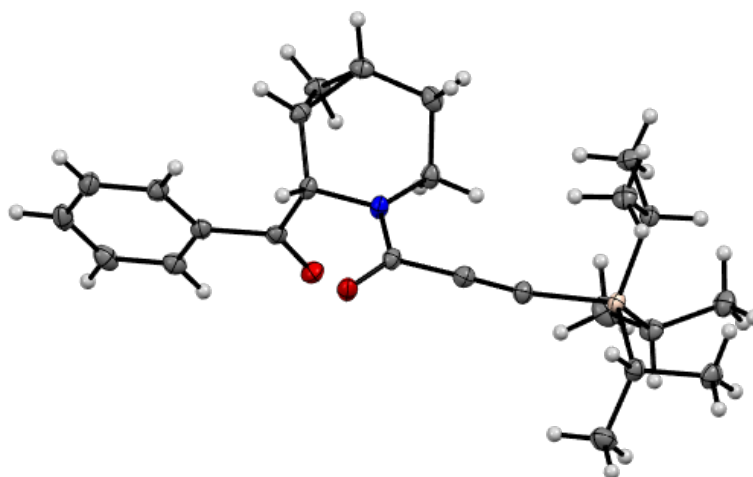

**Figure S6.** Single crystal XRD structure of compound **4**. Ortep drawn at 50% probability level.

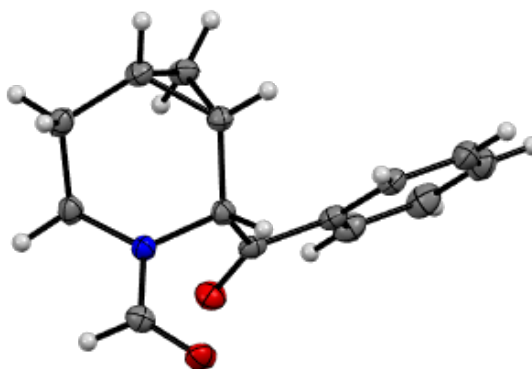

**Figure S7.** Single crystal XRD structure of compound **5**. Ortep drawn at 50% probability level.

## Crystal Data and Structure Refinement

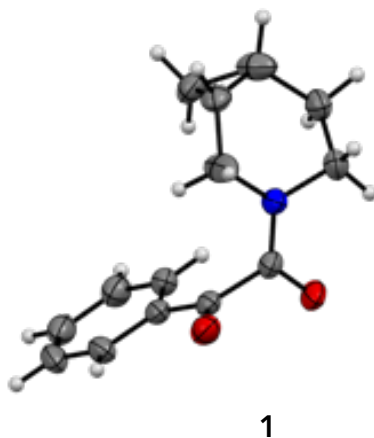

**Figure S8.** Single crystal XRD structure of **1**. Ortep drawn at 50% probability level.

Table S1A. Crystal data and structure refinement for **1**.

|                                 |                                                  |                  |
|---------------------------------|--------------------------------------------------|------------------|
| Identification code             | CRoberts01_Sarpong                               |                  |
| Empirical formula               | C <sub>14</sub> H <sub>15</sub> N O <sub>2</sub> |                  |
| Formula weight                  | 229.27                                           |                  |
| Temperature                     | 100(2) K                                         |                  |
| Wavelength                      | 1.54184 Å                                        |                  |
| Crystal system                  | Monoclinic                                       |                  |
| Space group                     | P 21/c                                           |                  |
| Unit cell dimensions            | a = 9.8713(2) Å                                  | α = 90°.         |
|                                 | b = 11.2665(2) Å                                 | β = 109.383(3)°. |
|                                 | c = 11.2229(3) Å                                 | γ = 90°.         |
| Volume                          | 1177.41(5) Å <sup>3</sup>                        |                  |
| Z                               | 4                                                |                  |
| Density (calculated)            | 1.293 Mg/m <sup>3</sup>                          |                  |
| Absorption coefficient          | 0.696 mm <sup>-1</sup>                           |                  |
| F(000)                          | 488                                              |                  |
| Crystal size                    | 0.180 x 0.060 x 0.050 mm <sup>3</sup>            |                  |
| Theta range for data collection | 4.749 to 74.491°.                                |                  |
| Index ranges                    | -12 ≤ h ≤ 12, -14 ≤ k ≤ 14, -12 ≤ l ≤ 14         |                  |
| Reflections collected           | 14176                                            |                  |
| Independent reflections         | 2397 [R(int) = 0.0447]                           |                  |
| Completeness to theta = 67.684° | 100.0 %                                          |                  |
| Absorption correction           | Semi-empirical from equivalents                  |                  |

|                                   |                                             |
|-----------------------------------|---------------------------------------------|
| Max. and min. transmission        | 1.00000 and 0.76396                         |
| Refinement method                 | Full-matrix least-squares on F <sup>2</sup> |
| Data / restraints / parameters    | 2397 / 12 / 209                             |
| Goodness-of-fit on F <sup>2</sup> | 1.101                                       |
| Final R indices [I>2sigma(I)]     | R1 = 0.0431, wR2 = 0.1158                   |
| R indices (all data)              | R1 = 0.0490, wR2 = 0.1208                   |
| Extinction coefficient            | n/a                                         |
| Largest diff. peak and hole       | 0.330 and -0.224 e.Å <sup>-3</sup>          |

Table S1B. Atomic coordinates (x 10<sup>4</sup>) and equivalent isotropic displacement parameters (Å<sup>2</sup>x 10<sup>3</sup>) for **1**. U(eq) is defined as one third of the trace of the orthogonalized U<sup>ij</sup> tensor.

|       | x        | y        | z        | U(eq) |
|-------|----------|----------|----------|-------|
| O(1)  | 6970(1)  | 6452(1)  | 9187(1)  | 43(1) |
| O(2)  | 6818(1)  | 8842(1)  | 7779(1)  | 44(1) |
| N(1)  | 4909(1)  | 7679(1)  | 6727(1)  | 41(1) |
| C(1)  | 8316(1)  | 6751(1)  | 6573(1)  | 38(1) |
| C(2)  | 9344(2)  | 6285(1)  | 6106(2)  | 46(1) |
| C(3)  | 10224(2) | 5369(1)  | 6742(2)  | 50(1) |
| C(4)  | 10073(2) | 4907(1)  | 7832(2)  | 50(1) |
| C(5)  | 9058(2)  | 5369(1)  | 8307(1)  | 43(1) |
| C(6)  | 8179(1)  | 6305(1)  | 7681(1)  | 34(1) |
| C(7)  | 7108(1)  | 6798(1)  | 8203(1)  | 34(1) |
| C(8)  | 6234(1)  | 7867(1)  | 7525(1)  | 34(1) |
| C(9)  | 3974(9)  | 8690(8)  | 6170(8)  | 42(1) |
| C(10) | 3578(5)  | 8569(5)  | 4713(6)  | 44(1) |
| C(11) | 2993(9)  | 7270(7)  | 4277(7)  | 57(3) |
| C(12) | 4030(3)  | 6360(2)  | 4258(3)  | 46(1) |
| C(13) | 3261(3)  | 6342(3)  | 5212(4)  | 40(1) |
| C(14) | 4272(7)  | 6485(6)  | 6472(6)  | 76(2) |
| C(15) | 4113(9)  | 6555(8)  | 6563(7)  | 33(2) |
| C(16) | 3845(9)  | 6196(5)  | 5019(8)  | 70(3) |
| C(17) | 2901(13) | 7292(11) | 4220(10) | 52(4) |
| C(18) | 1837(6)  | 7586(6)  | 4727(7)  | 90(2) |
| C(19) | 3114(9)  | 8392(8)  | 4753(10) | 50(2) |
| C(20) | 4171(14) | 8683(12) | 5901(12) | 48(3) |

Table S1C. Bond lengths [Å] and angles [°] for **1**.

---

|              |            |
|--------------|------------|
| O(1)-C(7)    | 1.2212(17) |
| O(2)-C(8)    | 1.2289(15) |
| N(1)-C(8)    | 1.3336(17) |
| N(1)-C(9)    | 1.469(9)   |
| N(1)-C(15)   | 1.470(10)  |
| N(1)-C(14)   | 1.473(6)   |
| N(1)-C(20)   | 1.490(14)  |
| C(1)-C(6)    | 1.389(2)   |
| C(1)-C(2)    | 1.390(2)   |
| C(1)-H(1)    | 0.9500     |
| C(2)-C(3)    | 1.385(2)   |
| C(2)-H(2)    | 0.9500     |
| C(3)-C(4)    | 1.383(3)   |
| C(3)-H(3)    | 0.9500     |
| C(4)-C(5)    | 1.383(2)   |
| C(4)-H(4)    | 0.9500     |
| C(5)-C(6)    | 1.3988(18) |
| C(5)-H(5)    | 0.9500     |
| C(6)-C(7)    | 1.4759(19) |
| C(7)-C(8)    | 1.5301(17) |
| C(9)-C(10)   | 1.556(9)   |
| C(9)-H(9A)   | 0.9900     |
| C(9)-H(9B)   | 0.9900     |
| C(10)-C(11)  | 1.590(8)   |
| C(10)-H(10A) | 0.9900     |
| C(10)-H(10B) | 0.9900     |
| C(11)-C(13)  | 1.442(8)   |
| C(11)-C(12)  | 1.453(9)   |
| C(11)-H(11)  | 1.0000     |
| C(12)-C(13)  | 1.504(4)   |
| C(12)-H(12A) | 0.9900     |
| C(12)-H(12B) | 0.9900     |
| C(13)-C(14)  | 1.444(7)   |
| C(13)-H(13)  | 1.0000     |
| C(14)-H(14A) | 0.9900     |
| C(14)-H(14B) | 0.9900     |
| C(15)-C(16)  | 1.712(10)  |
| C(15)-H(15A) | 0.9900     |

|                  |            |
|------------------|------------|
| C(15)-H(15B)     | 0.9900     |
| C(16)-C(17)      | 1.626(13)  |
| C(16)-H(16A)     | 0.9900     |
| C(16)-H(16B)     | 0.9900     |
| C(17)-C(19)      | 1.362(13)  |
| C(17)-C(18)      | 1.391(13)  |
| C(17)-H(17)      | 1.0000     |
| C(18)-C(19)      | 1.546(9)   |
| C(18)-H(18A)     | 0.9900     |
| C(18)-H(18B)     | 0.9900     |
| C(19)-C(20)      | 1.402(14)  |
| C(19)-H(19)      | 1.0000     |
| C(20)-H(20A)     | 0.9900     |
| C(20)-H(20B)     | 0.9900     |
| C(8)-N(1)-C(9)   | 120.0(3)   |
| C(8)-N(1)-C(15)  | 125.8(4)   |
| C(8)-N(1)-C(14)  | 122.4(3)   |
| C(9)-N(1)-C(14)  | 117.3(4)   |
| C(8)-N(1)-C(20)  | 117.7(5)   |
| C(15)-N(1)-C(20) | 116.5(5)   |
| C(6)-C(1)-C(2)   | 120.08(13) |
| C(6)-C(1)-H(1)   | 120.0      |
| C(2)-C(1)-H(1)   | 120.0      |
| C(3)-C(2)-C(1)   | 119.93(15) |
| C(3)-C(2)-H(2)   | 120.0      |
| C(1)-C(2)-H(2)   | 120.0      |
| C(4)-C(3)-C(2)   | 120.19(14) |
| C(4)-C(3)-H(3)   | 119.9      |
| C(2)-C(3)-H(3)   | 119.9      |
| C(5)-C(4)-C(3)   | 120.29(14) |
| C(5)-C(4)-H(4)   | 119.9      |
| C(3)-C(4)-H(4)   | 119.9      |
| C(4)-C(5)-C(6)   | 119.87(15) |
| C(4)-C(5)-H(5)   | 120.1      |
| C(6)-C(5)-H(5)   | 120.1      |
| C(1)-C(6)-C(5)   | 119.62(13) |
| C(1)-C(6)-C(7)   | 121.01(12) |
| C(5)-C(6)-C(7)   | 119.36(13) |
| O(1)-C(7)-C(6)   | 123.32(12) |

|                     |            |
|---------------------|------------|
| O(1)-C(7)-C(8)      | 119.14(12) |
| C(6)-C(7)-C(8)      | 117.30(11) |
| O(2)-C(8)-N(1)      | 125.26(12) |
| O(2)-C(8)-C(7)      | 116.39(11) |
| N(1)-C(8)-C(7)      | 118.34(11) |
| N(1)-C(9)-C(10)     | 106.4(5)   |
| N(1)-C(9)-H(9A)     | 110.5      |
| C(10)-C(9)-H(9A)    | 110.5      |
| N(1)-C(9)-H(9B)     | 110.5      |
| C(10)-C(9)-H(9B)    | 110.5      |
| H(9A)-C(9)-H(9B)    | 108.6      |
| C(9)-C(10)-C(11)    | 110.0(5)   |
| C(9)-C(10)-H(10A)   | 109.7      |
| C(11)-C(10)-H(10A)  | 109.7      |
| C(9)-C(10)-H(10B)   | 109.7      |
| C(11)-C(10)-H(10B)  | 109.7      |
| H(10A)-C(10)-H(10B) | 108.2      |
| C(13)-C(11)-C(12)   | 62.6(4)    |
| C(13)-C(11)-C(10)   | 118.9(5)   |
| C(12)-C(11)-C(10)   | 117.9(6)   |
| C(13)-C(11)-H(11)   | 115.7      |
| C(12)-C(11)-H(11)   | 115.7      |
| C(10)-C(11)-H(11)   | 115.7      |
| C(11)-C(12)-C(13)   | 58.3(3)    |
| C(11)-C(12)-H(12A)  | 117.9      |
| C(13)-C(12)-H(12A)  | 117.9      |
| C(11)-C(12)-H(12B)  | 117.9      |
| C(13)-C(12)-H(12B)  | 117.9      |
| H(12A)-C(12)-H(12B) | 115.1      |
| C(11)-C(13)-C(14)   | 122.1(4)   |
| C(11)-C(13)-C(12)   | 59.1(4)    |
| C(14)-C(13)-C(12)   | 110.3(4)   |
| C(11)-C(13)-H(13)   | 117.0      |
| C(14)-C(13)-H(13)   | 117.0      |
| C(12)-C(13)-H(13)   | 117.0      |
| C(13)-C(14)-N(1)    | 113.8(5)   |
| C(13)-C(14)-H(14A)  | 108.8      |
| N(1)-C(14)-H(14A)   | 108.8      |
| C(13)-C(14)-H(14B)  | 108.8      |

|                     |           |
|---------------------|-----------|
| N(1)-C(14)-H(14B)   | 108.8     |
| H(14A)-C(14)-H(14B) | 107.7     |
| N(1)-C(15)-C(16)    | 103.1(5)  |
| N(1)-C(15)-H(15A)   | 111.1     |
| C(16)-C(15)-H(15A)  | 111.1     |
| N(1)-C(15)-H(15B)   | 111.1     |
| C(16)-C(15)-H(15B)  | 111.1     |
| H(15A)-C(15)-H(15B) | 109.1     |
| C(17)-C(16)-C(15)   | 104.3(6)  |
| C(17)-C(16)-H(16A)  | 110.9     |
| C(15)-C(16)-H(16A)  | 110.9     |
| C(17)-C(16)-H(16B)  | 110.9     |
| C(15)-C(16)-H(16B)  | 110.9     |
| H(16A)-C(16)-H(16B) | 108.9     |
| C(19)-C(17)-C(18)   | 68.3(6)   |
| C(19)-C(17)-C(16)   | 118.2(8)  |
| C(18)-C(17)-C(16)   | 109.1(9)  |
| C(19)-C(17)-H(17)   | 117.1     |
| C(18)-C(17)-H(17)   | 117.1     |
| C(16)-C(17)-H(17)   | 117.1     |
| C(17)-C(18)-C(19)   | 54.9(6)   |
| C(17)-C(18)-H(18A)  | 118.3     |
| C(19)-C(18)-H(18A)  | 118.3     |
| C(17)-C(18)-H(18B)  | 118.3     |
| C(19)-C(18)-H(18B)  | 118.3     |
| H(18A)-C(18)-H(18B) | 115.5     |
| C(17)-C(19)-C(20)   | 125.2(10) |
| C(17)-C(19)-C(18)   | 56.7(6)   |
| C(20)-C(19)-C(18)   | 120.5(9)  |
| C(17)-C(19)-H(19)   | 114.1     |
| C(20)-C(19)-H(19)   | 114.1     |
| C(18)-C(19)-H(19)   | 114.1     |
| C(19)-C(20)-N(1)    | 117.1(10) |
| C(19)-C(20)-H(20A)  | 108.0     |
| N(1)-C(20)-H(20A)   | 108.0     |
| C(19)-C(20)-H(20B)  | 108.0     |
| N(1)-C(20)-H(20B)   | 108.0     |
| H(20A)-C(20)-H(20B) | 107.3     |

Symmetry transformations used to generate equivalent atoms:

Table S1D. Anisotropic displacement parameters ( $\text{\AA}^2 \times 10^3$ ) for **1**. The anisotropic displacement factor exponent takes the form:  $-2\pi^2 [ h^2 a^* 2 U^{11} + \dots + 2 h k a^* b^* U^{12} ]$

|       | $U^{11}$ | $U^{22}$ | $U^{33}$ | $U^{23}$ | $U^{13}$ | $U^{12}$ |
|-------|----------|----------|----------|----------|----------|----------|
| O(1)  | 53(1)    | 36(1)    | 37(1)    | -2(1)    | 10(1)    | -3(1)    |
| O(2)  | 39(1)    | 24(1)    | 60(1)    | -7(1)    | 7(1)     | -4(1)    |
| N(1)  | 40(1)    | 23(1)    | 47(1)    | -1(1)    | -3(1)    | -1(1)    |
| C(1)  | 39(1)    | 30(1)    | 38(1)    | -4(1)    | 6(1)     | 2(1)     |
| C(2)  | 47(1)    | 44(1)    | 47(1)    | -9(1)    | 15(1)    | 1(1)     |
| C(3)  | 38(1)    | 45(1)    | 62(1)    | -18(1)   | 10(1)    | 2(1)     |
| C(4)  | 36(1)    | 36(1)    | 65(1)    | -5(1)    | -2(1)    | 9(1)     |
| C(5)  | 38(1)    | 34(1)    | 44(1)    | 2(1)     | -2(1)    | 4(1)     |
| C(6)  | 34(1)    | 26(1)    | 34(1)    | -5(1)    | 1(1)     | 0(1)     |
| C(7)  | 36(1)    | 25(1)    | 34(1)    | -5(1)    | 3(1)     | -3(1)    |
| C(8)  | 35(1)    | 25(1)    | 39(1)    | -5(1)    | 9(1)     | -1(1)    |
| C(9)  | 47(2)    | 32(2)    | 43(3)    | -2(2)    | 9(2)     | 12(1)    |
| C(10) | 45(2)    | 31(2)    | 50(2)    | 4(1)     | 8(2)     | 6(2)     |
| C(11) | 52(4)    | 56(4)    | 46(4)    | 10(3)    | -5(3)    | -16(3)   |
| C(12) | 56(2)    | 37(1)    | 43(2)    | -10(1)   | 14(1)    | -5(1)    |
| C(13) | 30(1)    | 38(2)    | 49(2)    | -7(1)    | 9(1)     | -7(1)    |
| C(14) | 68(3)    | 24(2)    | 92(5)    | 7(2)     | -31(3)   | -14(2)   |
| C(15) | 40(3)    | 37(4)    | 23(3)    | -1(2)    | 12(3)    | -6(2)    |
| C(16) | 83(5)    | 26(2)    | 71(5)    | -10(3)   | -16(5)   | -2(3)    |
| C(17) | 51(6)    | 59(7)    | 40(6)    | -15(4)   | 8(4)     | 18(5)    |
| C(18) | 46(3)    | 82(4)    | 115(5)   | 21(4)    | -7(3)    | -6(3)    |
| C(19) | 55(5)    | 35(3)    | 45(3)    | 6(2)     | -2(4)    | 3(3)     |
| C(20) | 56(5)    | 24(3)    | 48(6)    | -2(3)    | -6(4)    | 4(3)     |

Table S1E. Hydrogen coordinates ( $\times 10^4$ ) and isotropic displacement parameters ( $\text{\AA}^2 \times 10^3$ ) for **1**.

|      | x    | y    | z    | U(eq) |
|------|------|------|------|-------|
| H(1) | 7708 | 7376 | 6134 | 45    |
| H(2) | 9441 | 6594 | 5351 | 56    |



|        |       |      |      |     |
|--------|-------|------|------|-----|
| H(3)   | 10934 | 5057 | 6428 | 60  |
| H(4)   | 10669 | 4270 | 8257 | 60  |
| H(5)   | 8959  | 5051 | 9058 | 51  |
| H(9A)  | 4482  | 9448 | 6465 | 50  |
| H(9B)  | 3097  | 8671 | 6413 | 50  |
| H(10A) | 4437  | 8726 | 4468 | 52  |
| H(10B) | 2834  | 9162 | 4286 | 52  |
| H(11)  | 2049  | 7228 | 3580 | 68  |
| H(12A) | 5060  | 6580 | 4555 | 55  |
| H(12B) | 3746  | 5768 | 3567 | 55  |
| H(13)  | 2492  | 5731 | 5093 | 48  |
| H(14A) | 5052  | 5896 | 6604 | 91  |
| H(14B) | 3777  | 6312 | 7089 | 91  |
| H(15A) | 3188  | 6660 | 6715 | 39  |
| H(15B) | 4683  | 5937 | 7142 | 39  |
| H(16A) | 4772  | 6126 | 4863 | 84  |
| H(16B) | 3316  | 5437 | 4791 | 84  |
| H(17)  | 2614  | 7250 | 3279 | 62  |
| H(18A) | 1855  | 7196 | 5522 | 108 |
| H(18B) | 872   | 7792 | 4139 | 108 |
| H(19)  | 2853  | 9058 | 4128 | 60  |
| H(20A) | 3722  | 9189 | 6388 | 58  |
| H(20B) | 4911  | 9169 | 5712 | 58  |

Table S1F. Torsion angles [ $^{\circ}$ ] for **1**.

|                     |             |
|---------------------|-------------|
| C(6)-C(1)-C(2)-C(3) | 0.4(2)      |
| C(1)-C(2)-C(3)-C(4) | 0.8(2)      |
| C(2)-C(3)-C(4)-C(5) | -1.0(2)     |
| C(3)-C(4)-C(5)-C(6) | 0.1(2)      |
| C(2)-C(1)-C(6)-C(5) | -1.3(2)     |
| C(2)-C(1)-C(6)-C(7) | 179.19(12)  |
| C(4)-C(5)-C(6)-C(1) | 1.0(2)      |
| C(4)-C(5)-C(6)-C(7) | -179.46(12) |
| C(1)-C(6)-C(7)-O(1) | -178.36(12) |
| C(5)-C(6)-C(7)-O(1) | 2.15(19)    |
| C(1)-C(6)-C(7)-C(8) | -3.97(17)   |
| C(5)-C(6)-C(7)-C(8) | 176.55(11)  |
| C(9)-N(1)-C(8)-O(2) | -6.3(4)     |

|                         |            |
|-------------------------|------------|
| C(15)-N(1)-C(8)-O(2)    | -169.7(3)  |
| C(14)-N(1)-C(8)-O(2)    | -179.6(4)  |
| C(20)-N(1)-C(8)-O(2)    | 11.7(6)    |
| C(9)-N(1)-C(8)-C(7)     | 172.9(3)   |
| C(15)-N(1)-C(8)-C(7)    | 9.4(4)     |
| C(14)-N(1)-C(8)-C(7)    | -0.5(4)    |
| C(20)-N(1)-C(8)-C(7)    | -169.1(5)  |
| O(1)-C(7)-C(8)-O(2)     | 93.21(16)  |
| C(6)-C(7)-C(8)-O(2)     | -81.43(15) |
| O(1)-C(7)-C(8)-N(1)     | -86.02(16) |
| C(6)-C(7)-C(8)-N(1)     | 99.35(15)  |
| C(8)-N(1)-C(9)-C(10)    | 120.9(4)   |
| C(14)-N(1)-C(9)-C(10)   | -65.4(6)   |
| N(1)-C(9)-C(10)-C(11)   | 51.0(6)    |
| C(9)-C(10)-C(11)-C(13)  | -16.6(8)   |
| C(9)-C(10)-C(11)-C(12)  | -89.0(6)   |
| C(10)-C(11)-C(12)-C(13) | 110.0(6)   |
| C(12)-C(11)-C(13)-C(14) | 95.9(5)    |
| C(10)-C(11)-C(13)-C(14) | -12.5(9)   |
| C(10)-C(11)-C(13)-C(12) | -108.4(7)  |
| C(11)-C(12)-C(13)-C(14) | -116.0(5)  |
| C(11)-C(13)-C(14)-N(1)  | 4.1(9)     |
| C(12)-C(13)-C(14)-N(1)  | 69.6(6)    |
| C(8)-N(1)-C(14)-C(13)   | -149.3(4)  |
| C(9)-N(1)-C(14)-C(13)   | 37.2(7)    |
| C(8)-N(1)-C(15)-C(16)   | -118.1(5)  |
| C(20)-N(1)-C(15)-C(16)  | 60.4(8)    |
| N(1)-C(15)-C(16)-C(17)  | -61.0(8)   |
| C(15)-C(16)-C(17)-C(19) | 31.8(12)   |
| C(15)-C(16)-C(17)-C(18) | -43.2(10)  |
| C(16)-C(17)-C(18)-C(19) | 113.6(9)   |
| C(18)-C(17)-C(19)-C(20) | 106.3(12)  |
| C(16)-C(17)-C(19)-C(20) | 5.5(17)    |
| C(16)-C(17)-C(19)-C(18) | -100.8(10) |
| C(17)-C(18)-C(19)-C(20) | -114.4(12) |
| C(17)-C(19)-C(20)-N(1)  | -13.5(17)  |
| C(18)-C(19)-C(20)-N(1)  | 55.2(14)   |
| C(8)-N(1)-C(20)-C(19)   | 153.9(8)   |
| C(15)-N(1)-C(20)-C(19)  | -24.8(12)  |

---

Symmetry transformations used to generate equivalent atoms:

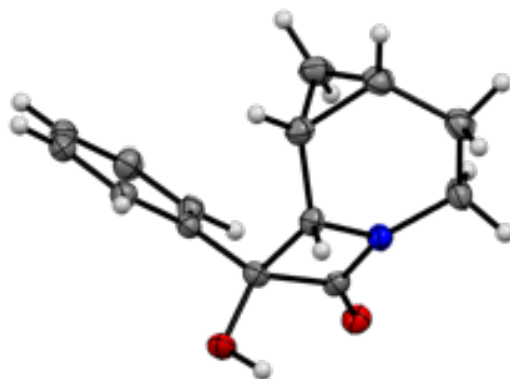

**2a**

**Figure S9.** Single crystal XRD structure of **2a**. Ortep drawn at 50% probability level.

Table S2A. Crystal data and structure refinement for **2a**.

|                                 |                                                  |                    |
|---------------------------------|--------------------------------------------------|--------------------|
| Identification code             | JRoque002_Sarpong                                |                    |
| Empirical formula               | C <sub>14</sub> H <sub>15</sub> N O <sub>2</sub> |                    |
| Formula weight                  | 229.27                                           |                    |
| Temperature                     | 100(2) K                                         |                    |
| Wavelength                      | 1.54184 Å                                        |                    |
| Crystal system                  | Monoclinic                                       |                    |
| Space group                     | C c                                              |                    |
| Unit cell dimensions            | a = 11.21720(10) Å                               | α = 90°.           |
|                                 | b = 11.38930(10) Å                               | β = 101.0980(10)°. |
|                                 | c = 18.10010(10) Å                               | γ = 90°.           |
| Volume                          | 2269.15(3) Å <sup>3</sup>                        |                    |
| Z                               | 8                                                |                    |
| Density (calculated)            | 1.342 Mg/m <sup>3</sup>                          |                    |
| Absorption coefficient          | 0.723 mm <sup>-1</sup>                           |                    |
| F(000)                          | 976                                              |                    |
| Crystal size                    | 0.520 x 0.250 x 0.230 mm <sup>3</sup>            |                    |
| Theta range for data collection | 5.589 to 74.452°.                                |                    |

|                                   |                                             |
|-----------------------------------|---------------------------------------------|
| Index ranges                      | -14<=h<=13, -14<=k<=14, -22<=l<=22          |
| Reflections collected             | 44300                                       |
| Independent reflections           | 4472 [R(int) = 0.0560]                      |
| Completeness to theta = 74.000°   | 99.2 %                                      |
| Absorption correction             | Semi-empirical from equivalents             |
| Max. and min. transmission        | 1.00000 and 0.60159                         |
| Refinement method                 | Full-matrix least-squares on F <sup>2</sup> |
| Data / restraints / parameters    | 4472 / 2 / 316                              |
| Goodness-of-fit on F <sup>2</sup> | 1.030                                       |
| Final R indices [I>2sigma(I)]     | R1 = 0.0279, wR2 = 0.0727                   |
| R indices (all data)              | R1 = 0.0279, wR2 = 0.0728                   |
| Absolute structure parameter      | -0.01(6)                                    |
| Extinction coefficient            | 0.0037(5)                                   |
| Largest diff. peak and hole       | 0.213 and -0.153 e.Å <sup>-3</sup>          |

Table S2B. Atomic coordinates ( x 10<sup>4</sup>) and equivalent isotropic displacement parameters (Å<sup>2</sup>x 10<sup>3</sup>) for **2a**. U(eq) is defined as one third of the trace of the orthogonalized U<sup>ij</sup> tensor.

|       | x       | y       | z       | U(eq) |
|-------|---------|---------|---------|-------|
| C(1)  | 2031(2) | 2775(2) | 4750(1) | 26(1) |
| C(2)  | 1277(2) | 2028(2) | 5195(1) | 28(1) |
| C(3)  | 1824(2) | 1857(2) | 6021(1) | 28(1) |
| C(4)  | 3190(2) | 1816(2) | 6300(1) | 30(1) |
| C(5)  | 2472(2) | 2877(2) | 6462(1) | 23(1) |
| C(6)  | 2501(2) | 3982(2) | 6013(1) | 19(1) |
| C(7)  | 3684(2) | 4762(2) | 6066(1) | 19(1) |
| C(8)  | 3615(2) | 4378(2) | 5234(1) | 19(1) |
| C(9)  | 4785(2) | 4305(2) | 6608(1) | 19(1) |
| C(10) | 5792(2) | 3853(2) | 6362(1) | 23(1) |
| C(11) | 6783(2) | 3429(2) | 6876(1) | 26(1) |
| C(12) | 6768(2) | 3440(2) | 7641(1) | 25(1) |
| C(13) | 5758(2) | 3873(2) | 7888(1) | 24(1) |
| C(14) | 4776(2) | 4317(2) | 7380(1) | 23(1) |
| C(15) | 8130(2) | 3769(2) | 5115(1) | 26(1) |
| C(16) | 8732(2) | 4571(2) | 4612(1) | 29(1) |
| C(17) | 8627(2) | 4165(2) | 3807(1) | 28(1) |
| C(18) | 8564(2) | 2877(2) | 3601(1) | 28(1) |
| C(19) | 7434(2) | 3629(2) | 3407(1) | 22(1) |

|       |         |         |         |       |
|-------|---------|---------|---------|-------|
| C(20) | 6477(2) | 3555(2) | 3882(1) | 20(1) |
| C(21) | 5660(2) | 2432(2) | 3895(1) | 19(1) |
| C(22) | 6395(2) | 2275(2) | 4709(1) | 20(1) |
| C(23) | 5790(2) | 1476(2) | 3341(1) | 19(1) |
| C(24) | 5080(2) | 1528(2) | 2619(1) | 22(1) |
| C(25) | 5157(2) | 643(2)  | 2104(1) | 24(1) |
| C(26) | 5958(2) | -293(2) | 2292(1) | 25(1) |
| C(27) | 6693(2) | -323(2) | 3004(1) | 25(1) |
| C(28) | 6605(2) | 551(2)  | 3525(1) | 23(1) |
| N(1)  | 2629(1) | 3719(1) | 5234(1) | 20(1) |
| N(2)  | 7021(1) | 3272(2) | 4671(1) | 21(1) |
| O(1)  | 4211(1) | 4576(1) | 4744(1) | 23(1) |
| O(2)  | 3550(1) | 5965(1) | 6202(1) | 24(1) |
| O(3)  | 6430(1) | 1548(1) | 5213(1) | 26(1) |
| O(4)  | 4413(1) | 2672(1) | 3842(1) | 24(1) |

---

Table S2C. Bond lengths [ $\text{\AA}$ ] and angles [ $^\circ$ ] for **2a**.

|            |          |
|------------|----------|
| C(1)-N(1)  | 1.466(2) |
| C(1)-C(2)  | 1.533(3) |
| C(1)-H(1A) | 0.9900   |
| C(1)-H(1B) | 0.9900   |
| C(2)-C(3)  | 1.516(3) |
| C(2)-H(2A) | 0.9900   |
| C(2)-H(2B) | 0.9900   |
| C(3)-C(5)  | 1.514(3) |
| C(3)-C(4)  | 1.519(3) |
| C(3)-H(3)  | 1.0000   |
| C(4)-C(5)  | 1.512(3) |
| C(4)-H(4A) | 0.9900   |
| C(4)-H(4B) | 0.9900   |
| C(5)-C(6)  | 1.502(3) |
| C(5)-H(5)  | 1.0000   |
| C(6)-N(1)  | 1.475(2) |
| C(6)-C(7)  | 1.584(3) |
| C(6)-H(6)  | 1.0000   |
| C(7)-O(2)  | 1.405(2) |
| C(7)-C(9)  | 1.514(2) |
| C(7)-C(8)  | 1.556(2) |

|              |          |
|--------------|----------|
| C(8)-O(1)    | 1.230(2) |
| C(8)-N(1)    | 1.337(3) |
| C(9)-C(10)   | 1.391(3) |
| C(9)-C(14)   | 1.398(3) |
| C(10)-C(11)  | 1.391(3) |
| C(10)-H(10)  | 0.9500   |
| C(11)-C(12)  | 1.388(3) |
| C(11)-H(11)  | 0.9500   |
| C(12)-C(13)  | 1.386(3) |
| C(12)-H(12)  | 0.9500   |
| C(13)-C(14)  | 1.387(3) |
| C(13)-H(13)  | 0.9500   |
| C(14)-H(14)  | 0.9500   |
| C(15)-N(2)   | 1.459(2) |
| C(15)-C(16)  | 1.534(3) |
| C(15)-H(15A) | 0.9900   |
| C(15)-H(15B) | 0.9900   |
| C(16)-C(17)  | 1.512(3) |
| C(16)-H(16A) | 0.9900   |
| C(16)-H(16B) | 0.9900   |
| C(17)-C(18)  | 1.512(3) |
| C(17)-C(19)  | 1.522(3) |
| C(17)-H(17)  | 1.0000   |
| C(18)-C(19)  | 1.514(3) |
| C(18)-H(18A) | 0.9900   |
| C(18)-H(18B) | 0.9900   |
| C(19)-C(20)  | 1.502(3) |
| C(19)-H(19)  | 1.0000   |
| C(20)-N(2)   | 1.476(2) |
| C(20)-C(21)  | 1.576(3) |
| C(20)-H(20)  | 1.0000   |
| C(21)-O(4)   | 1.411(2) |
| C(21)-C(23)  | 1.506(3) |
| C(21)-C(22)  | 1.554(2) |
| C(22)-O(3)   | 1.226(2) |
| C(22)-N(2)   | 1.343(3) |
| C(23)-C(28)  | 1.393(3) |
| C(23)-C(24)  | 1.396(3) |
| C(24)-C(25)  | 1.386(3) |

|                  |            |
|------------------|------------|
| C(24)-H(24)      | 0.9500     |
| C(25)-C(26)      | 1.393(3)   |
| C(25)-H(25)      | 0.9500     |
| C(26)-C(27)      | 1.390(3)   |
| C(26)-H(26)      | 0.9500     |
| C(27)-C(28)      | 1.388(3)   |
| C(27)-H(27)      | 0.9500     |
| C(28)-H(28)      | 0.9500     |
| O(2)-H(2)        | 0.91(4)    |
| O(4)-H(4)        | 0.90(3)    |
| N(1)-C(1)-C(2)   | 109.20(16) |
| N(1)-C(1)-H(1A)  | 109.8      |
| C(2)-C(1)-H(1A)  | 109.8      |
| N(1)-C(1)-H(1B)  | 109.8      |
| C(2)-C(1)-H(1B)  | 109.8      |
| H(1A)-C(1)-H(1B) | 108.3      |
| C(3)-C(2)-C(1)   | 115.45(17) |
| C(3)-C(2)-H(2A)  | 108.4      |
| C(1)-C(2)-H(2A)  | 108.4      |
| C(3)-C(2)-H(2B)  | 108.4      |
| C(1)-C(2)-H(2B)  | 108.4      |
| H(2A)-C(2)-H(2B) | 107.5      |
| C(5)-C(3)-C(2)   | 118.92(17) |
| C(5)-C(3)-C(4)   | 59.81(13)  |
| C(2)-C(3)-C(4)   | 121.51(19) |
| C(5)-C(3)-H(3)   | 115.1      |
| C(2)-C(3)-H(3)   | 115.1      |
| C(4)-C(3)-H(3)   | 115.1      |
| C(5)-C(4)-C(3)   | 59.94(14)  |
| C(5)-C(4)-H(4A)  | 117.8      |
| C(3)-C(4)-H(4A)  | 117.8      |
| C(5)-C(4)-H(4B)  | 117.8      |
| C(3)-C(4)-H(4B)  | 117.8      |
| H(4A)-C(4)-H(4B) | 114.9      |
| C(6)-C(5)-C(4)   | 119.81(17) |
| C(6)-C(5)-C(3)   | 114.59(16) |
| C(4)-C(5)-C(3)   | 60.25(14)  |
| C(6)-C(5)-H(5)   | 116.7      |
| C(4)-C(5)-H(5)   | 116.7      |

|                    |            |
|--------------------|------------|
| C(3)-C(5)-H(5)     | 116.7      |
| N(1)-C(6)-C(5)     | 111.31(15) |
| N(1)-C(6)-C(7)     | 86.40(13)  |
| C(5)-C(6)-C(7)     | 122.82(15) |
| N(1)-C(6)-H(6)     | 111.2      |
| C(5)-C(6)-H(6)     | 111.2      |
| C(7)-C(6)-H(6)     | 111.2      |
| O(2)-C(7)-C(9)     | 108.82(15) |
| O(2)-C(7)-C(8)     | 117.15(15) |
| C(9)-C(7)-C(8)     | 114.40(15) |
| O(2)-C(7)-C(6)     | 116.15(15) |
| C(9)-C(7)-C(6)     | 114.60(15) |
| C(8)-C(7)-C(6)     | 84.21(13)  |
| O(1)-C(8)-N(1)     | 131.89(17) |
| O(1)-C(8)-C(7)     | 135.59(17) |
| N(1)-C(8)-C(7)     | 92.53(14)  |
| C(10)-C(9)-C(14)   | 119.09(17) |
| C(10)-C(9)-C(7)    | 122.09(17) |
| C(14)-C(9)-C(7)    | 118.80(17) |
| C(9)-C(10)-C(11)   | 120.51(18) |
| C(9)-C(10)-H(10)   | 119.7      |
| C(11)-C(10)-H(10)  | 119.7      |
| C(12)-C(11)-C(10)  | 120.19(19) |
| C(12)-C(11)-H(11)  | 119.9      |
| C(10)-C(11)-H(11)  | 119.9      |
| C(13)-C(12)-C(11)  | 119.44(18) |
| C(13)-C(12)-H(12)  | 120.3      |
| C(11)-C(12)-H(12)  | 120.3      |
| C(12)-C(13)-C(14)  | 120.70(19) |
| C(12)-C(13)-H(13)  | 119.6      |
| C(14)-C(13)-H(13)  | 119.6      |
| C(13)-C(14)-C(9)   | 120.05(19) |
| C(13)-C(14)-H(14)  | 120.0      |
| C(9)-C(14)-H(14)   | 120.0      |
| N(2)-C(15)-C(16)   | 109.34(16) |
| N(2)-C(15)-H(15A)  | 109.8      |
| C(16)-C(15)-H(15A) | 109.8      |
| N(2)-C(15)-H(15B)  | 109.8      |
| C(16)-C(15)-H(15B) | 109.8      |



|                     |            |
|---------------------|------------|
| H(15A)-C(15)-H(15B) | 108.3      |
| C(17)-C(16)-C(15)   | 115.34(17) |
| C(17)-C(16)-H(16A)  | 108.4      |
| C(15)-C(16)-H(16A)  | 108.4      |
| C(17)-C(16)-H(16B)  | 108.4      |
| C(15)-C(16)-H(16B)  | 108.4      |
| H(16A)-C(16)-H(16B) | 107.5      |
| C(16)-C(17)-C(18)   | 121.73(19) |
| C(16)-C(17)-C(19)   | 118.69(17) |
| C(18)-C(17)-C(19)   | 59.87(13)  |
| C(16)-C(17)-H(17)   | 115.1      |
| C(18)-C(17)-H(17)   | 115.1      |
| C(19)-C(17)-H(17)   | 115.1      |
| C(17)-C(18)-C(19)   | 60.40(13)  |
| C(17)-C(18)-H(18A)  | 117.7      |
| C(19)-C(18)-H(18A)  | 117.7      |
| C(17)-C(18)-H(18B)  | 117.7      |
| C(19)-C(18)-H(18B)  | 117.7      |
| H(18A)-C(18)-H(18B) | 114.9      |
| C(20)-C(19)-C(18)   | 119.59(16) |
| C(20)-C(19)-C(17)   | 114.14(16) |
| C(18)-C(19)-C(17)   | 59.73(13)  |
| C(20)-C(19)-H(19)   | 116.9      |
| C(18)-C(19)-H(19)   | 116.9      |
| C(17)-C(19)-H(19)   | 116.9      |
| N(2)-C(20)-C(19)    | 111.04(15) |
| N(2)-C(20)-C(21)    | 86.63(13)  |
| C(19)-C(20)-C(21)   | 122.37(16) |
| N(2)-C(20)-H(20)    | 111.4      |
| C(19)-C(20)-H(20)   | 111.4      |
| C(21)-C(20)-H(20)   | 111.4      |
| O(4)-C(21)-C(23)    | 108.46(14) |
| O(4)-C(21)-C(22)    | 115.20(15) |
| C(23)-C(21)-C(22)   | 116.49(16) |
| O(4)-C(21)-C(20)    | 114.42(15) |
| C(23)-C(21)-C(20)   | 116.46(15) |
| C(22)-C(21)-C(20)   | 84.47(13)  |
| O(3)-C(22)-N(2)     | 131.81(18) |
| O(3)-C(22)-C(21)    | 135.85(17) |

|                   |            |
|-------------------|------------|
| N(2)-C(22)-C(21)  | 92.33(14)  |
| C(28)-C(23)-C(24) | 119.08(17) |
| C(28)-C(23)-C(21) | 122.09(16) |
| C(24)-C(23)-C(21) | 118.83(17) |
| C(25)-C(24)-C(23) | 120.04(18) |
| C(25)-C(24)-H(24) | 120.0      |
| C(23)-C(24)-H(24) | 120.0      |
| C(24)-C(25)-C(26) | 120.86(18) |
| C(24)-C(25)-H(25) | 119.6      |
| C(26)-C(25)-H(25) | 119.6      |
| C(27)-C(26)-C(25) | 119.00(18) |
| C(27)-C(26)-H(26) | 120.5      |
| C(25)-C(26)-H(26) | 120.5      |
| C(28)-C(27)-C(26) | 120.35(18) |
| C(28)-C(27)-H(27) | 119.8      |
| C(26)-C(27)-H(27) | 119.8      |
| C(27)-C(28)-C(23) | 120.62(18) |
| C(27)-C(28)-H(28) | 119.7      |
| C(23)-C(28)-H(28) | 119.7      |
| C(8)-N(1)-C(1)    | 134.06(17) |
| C(8)-N(1)-C(6)    | 96.84(14)  |
| C(1)-N(1)-C(6)    | 127.07(16) |
| C(22)-N(2)-C(15)  | 134.29(16) |
| C(22)-N(2)-C(20)  | 96.45(14)  |
| C(15)-N(2)-C(20)  | 126.66(16) |
| C(7)-O(2)-H(2)    | 107(2)     |
| C(21)-O(4)-H(4)   | 107.7(19)  |

---

Symmetry transformations used to generate equivalent atoms:

Table S2D. Anisotropic displacement parameters ( $\text{\AA}^2 \times 10^3$ ) for **2a**. The anisotropic displacement factor exponent takes the form:  $-2\pi^2 [h^2 a^{*2} U^{11} + \dots + 2 h k a^* b^* U^{12}]$

|      | $U^{11}$ | $U^{22}$ | $U^{33}$ | $U^{23}$ | $U^{13}$ | $U^{12}$ |
|------|----------|----------|----------|----------|----------|----------|
| C(1) | 27(1)    | 27(1)    | 24(1)    | -5(1)    | 3(1)     | -8(1)    |
| C(2) | 23(1)    | 27(1)    | 32(1)    | -2(1)    | 3(1)     | -6(1)    |
| C(3) | 26(1)    | 24(1)    | 33(1)    | 4(1)     | 5(1)     | -5(1)    |
| C(4) | 28(1)    | 24(1)    | 38(1)    | 5(1)     | 4(1)     | 2(1)     |

|       |       |       |       |       |       |       |
|-------|-------|-------|-------|-------|-------|-------|
| C(5)  | 20(1) | 23(1) | 24(1) | 3(1)  | 4(1)  | 0(1)  |
| C(6)  | 17(1) | 22(1) | 19(1) | 0(1)  | 3(1)  | 1(1)  |
| C(7)  | 20(1) | 17(1) | 20(1) | -1(1) | 4(1)  | 0(1)  |
| C(8)  | 19(1) | 18(1) | 20(1) | 2(1)  | 2(1)  | 3(1)  |
| C(9)  | 19(1) | 16(1) | 22(1) | 0(1)  | 1(1)  | -2(1) |
| C(10) | 21(1) | 25(1) | 23(1) | -1(1) | 2(1)  | -2(1) |
| C(11) | 20(1) | 27(1) | 31(1) | 0(1)  | 2(1)  | 2(1)  |
| C(12) | 22(1) | 20(1) | 30(1) | 2(1)  | -3(1) | -2(1) |
| C(13) | 28(1) | 20(1) | 22(1) | 0(1)  | -1(1) | -4(1) |
| C(14) | 22(1) | 22(1) | 22(1) | -2(1) | 2(1)  | -2(1) |
| C(15) | 19(1) | 33(1) | 24(1) | -5(1) | 0(1)  | -5(1) |
| C(16) | 23(1) | 28(1) | 36(1) | -4(1) | 4(1)  | -9(1) |
| C(17) | 24(1) | 27(1) | 35(1) | -2(1) | 10(1) | -5(1) |
| C(18) | 24(1) | 27(1) | 32(1) | -3(1) | 7(1)  | 0(1)  |
| C(19) | 23(1) | 21(1) | 23(1) | 0(1)  | 6(1)  | -1(1) |
| C(20) | 18(1) | 21(1) | 20(1) | 1(1)  | 1(1)  | 0(1)  |
| C(21) | 14(1) | 22(1) | 20(1) | 1(1)  | 1(1)  | -1(1) |
| C(22) | 18(1) | 22(1) | 20(1) | -2(1) | 3(1)  | 1(1)  |
| C(23) | 15(1) | 19(1) | 21(1) | 0(1)  | 3(1)  | -5(1) |
| C(24) | 16(1) | 26(1) | 22(1) | 1(1)  | 2(1)  | 0(1)  |
| C(25) | 22(1) | 31(1) | 20(1) | -2(1) | 2(1)  | -2(1) |
| C(26) | 27(1) | 23(1) | 26(1) | -3(1) | 8(1)  | -5(1) |
| C(27) | 25(1) | 20(1) | 29(1) | 2(1)  | 5(1)  | 2(1)  |
| C(28) | 22(1) | 22(1) | 22(1) | 2(1)  | 1(1)  | -1(1) |
| N(1)  | 20(1) | 20(1) | 19(1) | -1(1) | 3(1)  | -2(1) |
| N(2)  | 17(1) | 24(1) | 19(1) | 1(1)  | 1(1)  | -2(1) |
| O(1)  | 21(1) | 27(1) | 22(1) | 1(1)  | 6(1)  | -1(1) |
| O(2)  | 26(1) | 17(1) | 27(1) | -1(1) | 1(1)  | 2(1)  |
| O(3)  | 29(1) | 26(1) | 21(1) | 4(1)  | 1(1)  | 0(1)  |
| O(4)  | 14(1) | 31(1) | 26(1) | -4(1) | 2(1)  | 1(1)  |

Table S2E. Hydrogen coordinates ( $\times 10^4$ ) and isotropic displacement parameters ( $\text{\AA}^2 \times 10^3$ ) for **2a**.

|       | x    | y    | z    | U(eq) |
|-------|------|------|------|-------|
| H(1A) | 2649 | 2279 | 4577 | 31    |
| H(1B) | 1497 | 3114 | 4301 | 31    |

|        |          |          |          |        |
|--------|----------|----------|----------|--------|
| H(2A)  | 469      | 2398     | 5156     | 33     |
| H(2B)  | 1150     | 1245     | 4954     | 33     |
| H(3)   | 1340     | 1351     | 6305     | 33     |
| H(4A)  | 3508     | 1282     | 6724     | 36     |
| H(4B)  | 3717     | 1901     | 5923     | 36     |
| H(5)   | 2351     | 2973     | 6992     | 27     |
| H(6)   | 1769     | 4479     | 6022     | 23     |
| H(10)  | 5804     | 3834     | 5839     | 28     |
| H(11)  | 7471     | 3132     | 6703     | 32     |
| H(12)  | 7445     | 3152     | 7993     | 30     |
| H(13)  | 5738     | 3866     | 8410     | 29     |
| H(14)  | 4097     | 4630     | 7556     | 27     |
| H(15A) | 8695     | 3130     | 5322     | 31     |
| H(15B) | 7933     | 4226     | 5541     | 31     |
| H(16A) | 8366     | 5362     | 4609     | 35     |
| H(16B) | 9604     | 4645     | 4841     | 35     |
| H(17)  | 9046     | 4674     | 3486     | 34     |
| H(18A) | 8604     | 2299     | 4014     | 33     |
| H(18B) | 8959     | 2623     | 3183     | 33     |
| H(19)  | 7154     | 3838     | 2864     | 27     |
| H(20)  | 5984     | 4291     | 3848     | 24     |
| H(24)  | 4542     | 2169     | 2479     | 26     |
| H(25)  | 4659     | 676      | 1617     | 29     |
| H(26)  | 6000     | -902     | 1940     | 30     |
| H(27)  | 7259     | -944     | 3135     | 30     |
| H(28)  | 7106     | 518      | 4012     | 27     |
| H(2)   | 2830(30) | 6190(30) | 5911(19) | 56(10) |
| H(4)   | 4350(30) | 3320(30) | 4118(17) | 37(7)  |

Table S2F. Torsion angles [°] for **2a**.

|                     |            |
|---------------------|------------|
| N(1)-C(1)-C(2)-C(3) | -36.1(2)   |
| C(1)-C(2)-C(3)-C(5) | 38.9(3)    |
| C(1)-C(2)-C(3)-C(4) | -31.5(3)   |
| C(2)-C(3)-C(4)-C(5) | 107.4(2)   |
| C(3)-C(4)-C(5)-C(6) | -103.0(2)  |
| C(2)-C(3)-C(5)-C(6) | -0.1(3)    |
| C(4)-C(3)-C(5)-C(6) | 111.60(19) |
| C(2)-C(3)-C(5)-C(4) | -111.7(2)  |

|                         |             |
|-------------------------|-------------|
| C(4)-C(5)-C(6)-N(1)     | 32.5(2)     |
| C(3)-C(5)-C(6)-N(1)     | -36.0(2)    |
| C(4)-C(5)-C(6)-C(7)     | -67.4(2)    |
| C(3)-C(5)-C(6)-C(7)     | -135.85(18) |
| N(1)-C(6)-C(7)-O(2)     | 118.43(16)  |
| C(5)-C(6)-C(7)-O(2)     | -128.45(18) |
| N(1)-C(6)-C(7)-C(9)     | -113.25(15) |
| C(5)-C(6)-C(7)-C(9)     | -0.1(2)     |
| N(1)-C(6)-C(7)-C(8)     | 0.97(12)    |
| C(5)-C(6)-C(7)-C(8)     | 114.09(18)  |
| O(2)-C(7)-C(8)-O(1)     | 62.6(3)     |
| C(9)-C(7)-C(8)-O(1)     | -66.5(3)    |
| C(6)-C(7)-C(8)-O(1)     | 179.1(2)    |
| O(2)-C(7)-C(8)-N(1)     | -117.55(17) |
| C(9)-C(7)-C(8)-N(1)     | 113.35(16)  |
| C(6)-C(7)-C(8)-N(1)     | -1.07(14)   |
| O(2)-C(7)-C(9)-C(10)    | -117.20(18) |
| C(8)-C(7)-C(9)-C(10)    | 16.0(2)     |
| C(6)-C(7)-C(9)-C(10)    | 110.88(19)  |
| O(2)-C(7)-C(9)-C(14)    | 64.2(2)     |
| C(8)-C(7)-C(9)-C(14)    | -162.70(16) |
| C(6)-C(7)-C(9)-C(14)    | -67.8(2)    |
| C(14)-C(9)-C(10)-C(11)  | -0.6(3)     |
| C(7)-C(9)-C(10)-C(11)   | -179.28(17) |
| C(9)-C(10)-C(11)-C(12)  | 0.9(3)      |
| C(10)-C(11)-C(12)-C(13) | 0.1(3)      |
| C(11)-C(12)-C(13)-C(14) | -1.4(3)     |
| C(12)-C(13)-C(14)-C(9)  | 1.6(3)      |
| C(10)-C(9)-C(14)-C(13)  | -0.6(3)     |
| C(7)-C(9)-C(14)-C(13)   | 178.12(17)  |
| N(2)-C(15)-C(16)-C(17)  | -35.9(2)    |
| C(15)-C(16)-C(17)-C(18) | -30.7(3)    |
| C(15)-C(16)-C(17)-C(19) | 39.8(3)     |
| C(16)-C(17)-C(18)-C(19) | 107.1(2)    |
| C(17)-C(18)-C(19)-C(20) | -102.3(2)   |
| C(16)-C(17)-C(19)-C(20) | -0.7(3)     |
| C(18)-C(17)-C(19)-C(20) | 111.41(19)  |
| C(16)-C(17)-C(19)-C(18) | -112.1(2)   |
| C(18)-C(19)-C(20)-N(2)  | 30.8(2)     |

|                         |             |
|-------------------------|-------------|
| C(17)-C(19)-C(20)-N(2)  | -36.9(2)    |
| C(18)-C(19)-C(20)-C(21) | -69.0(2)    |
| C(17)-C(19)-C(20)-C(21) | -136.60(18) |
| N(2)-C(20)-C(21)-O(4)   | 112.85(15)  |
| C(19)-C(20)-C(21)-O(4)  | -134.29(17) |
| N(2)-C(20)-C(21)-C(23)  | -119.25(16) |
| C(19)-C(20)-C(21)-C(23) | -6.4(2)     |
| N(2)-C(20)-C(21)-C(22)  | -2.35(13)   |
| C(19)-C(20)-C(21)-C(22) | 110.50(18)  |
| O(4)-C(21)-C(22)-O(3)   | 68.2(3)     |
| C(23)-C(21)-C(22)-O(3)  | -60.5(3)    |
| C(20)-C(21)-C(22)-O(3)  | -177.4(2)   |
| O(4)-C(21)-C(22)-N(2)   | -111.84(17) |
| C(23)-C(21)-C(22)-N(2)  | 119.45(16)  |
| C(20)-C(21)-C(22)-N(2)  | 2.58(14)    |
| O(4)-C(21)-C(23)-C(28)  | -137.44(17) |
| C(22)-C(21)-C(23)-C(28) | -5.5(2)     |
| C(20)-C(21)-C(23)-C(28) | 91.8(2)     |
| O(4)-C(21)-C(23)-C(24)  | 43.2(2)     |
| C(22)-C(21)-C(23)-C(24) | 175.15(16)  |
| C(20)-C(21)-C(23)-C(24) | -87.5(2)    |
| C(28)-C(23)-C(24)-C(25) | 2.4(3)      |
| C(21)-C(23)-C(24)-C(25) | -178.27(17) |
| C(23)-C(24)-C(25)-C(26) | -1.3(3)     |
| C(24)-C(25)-C(26)-C(27) | -0.8(3)     |
| C(25)-C(26)-C(27)-C(28) | 1.8(3)      |
| C(26)-C(27)-C(28)-C(23) | -0.7(3)     |
| C(24)-C(23)-C(28)-C(27) | -1.4(3)     |
| C(21)-C(23)-C(28)-C(27) | 179.29(18)  |
| O(1)-C(8)-N(1)-C(1)     | 17.1(4)     |
| C(7)-C(8)-N(1)-C(1)     | -162.8(2)   |
| O(1)-C(8)-N(1)-C(6)     | -179.0(2)   |
| C(7)-C(8)-N(1)-C(6)     | 1.15(15)    |
| C(2)-C(1)-N(1)-C(8)     | 156.8(2)    |
| C(2)-C(1)-N(1)-C(6)     | -3.1(3)     |
| C(5)-C(6)-N(1)-C(8)     | -125.08(16) |
| C(7)-C(6)-N(1)-C(8)     | -1.14(14)   |
| C(5)-C(6)-N(1)-C(1)     | 40.5(2)     |
| C(7)-C(6)-N(1)-C(1)     | 164.45(18)  |

|                        |             |
|------------------------|-------------|
| O(3)-C(22)-N(2)-C(15)  | 15.5(4)     |
| C(21)-C(22)-N(2)-C(15) | -164.5(2)   |
| O(3)-C(22)-N(2)-C(20)  | 177.2(2)    |
| C(21)-C(22)-N(2)-C(20) | -2.76(15)   |
| C(16)-C(15)-N(2)-C(22) | 152.0(2)    |
| C(16)-C(15)-N(2)-C(20) | -5.1(3)     |
| C(19)-C(20)-N(2)-C(22) | -120.78(16) |
| C(21)-C(20)-N(2)-C(22) | 2.73(15)    |
| C(19)-C(20)-N(2)-C(15) | 43.0(2)     |
| C(21)-C(20)-N(2)-C(15) | 166.48(18)  |

Symmetry transformations used to generate equivalent atoms:

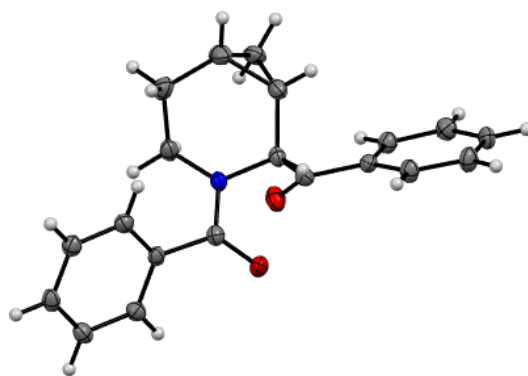

**3b**

**Figure S10.** Single crystal XRD structure of **3b**. Ortep drawn at 50% probability level.

Table S3A. Crystal data and structure refinement for **3b**.

|                      |                                                  |                               |
|----------------------|--------------------------------------------------|-------------------------------|
| Identification code  | CRoberts04_Sarpong                               |                               |
| Empirical formula    | C <sub>20</sub> H <sub>19</sub> N O <sub>2</sub> |                               |
| Formula weight       | 305.36                                           |                               |
| Temperature          | 100(2) K                                         |                               |
| Wavelength           | 1.54184 Å                                        |                               |
| Crystal system       | Monoclinic                                       |                               |
| Space group          | I a                                              |                               |
| Unit cell dimensions | a = 10.52883(16) Å                               | $\alpha = 90^\circ$ .         |
|                      | b = 10.98437(15) Å                               | $\beta = 95.4721(13)^\circ$ . |

|                                   |                                             |                       |
|-----------------------------------|---------------------------------------------|-----------------------|
|                                   | $c = 13.37045(19) \text{ \AA}$              | $\gamma = 90^\circ$ . |
| Volume                            | 1539.28(4) $\text{\AA}^3$                   |                       |
| Z                                 | 4                                           |                       |
| Density (calculated)              | 1.318 $\text{Mg/m}^3$                       |                       |
| Absorption coefficient            | 0.673 $\text{mm}^{-1}$                      |                       |
| F(000)                            | 648                                         |                       |
| Crystal size                      | 0.180 x 0.110 x 0.080 $\text{mm}^3$         |                       |
| Theta range for data collection   | 5.221 to 66.594°.                           |                       |
| Index ranges                      | -12<=h<=12, -13<=k<=13, -15<=l<=15          |                       |
| Reflections collected             | 17793                                       |                       |
| Independent reflections           | 2715 [R(int) = 0.0380]                      |                       |
| Completeness to theta = 66.594°   | 100.0 %                                     |                       |
| Absorption correction             | Semi-empirical from equivalents             |                       |
| Max. and min. transmission        | 1.00000 and 0.78956                         |                       |
| Refinement method                 | Full-matrix least-squares on F <sup>2</sup> |                       |
| Data / restraints / parameters    | 2715 / 2 / 208                              |                       |
| Goodness-of-fit on F <sup>2</sup> | 1.037                                       |                       |
| Final R indices [I>2sigma(I)]     | R1 = 0.0257, wR2 = 0.0657                   |                       |
| R indices (all data)              | R1 = 0.0260, wR2 = 0.0660                   |                       |
| Absolute structure parameter      | 0.02(8)                                     |                       |
| Extinction coefficient            | n/a                                         |                       |
| Largest diff. peak and hole       | 0.102 and -0.163 $\text{e.\AA}^{-3}$        |                       |

Table S3B. Atomic coordinates ( $\times 10^4$ ) and equivalent isotropic displacement parameters ( $\text{\AA}^2 \times 10^3$ ) for **3b**. U(eq) is defined as one third of the trace of the orthogonalized  $U^{ij}$  tensor.

|      | x       | y       | z       | U(eq) |
|------|---------|---------|---------|-------|
| O(1) | 5104(2) | 6578(1) | 4536(1) | 28(1) |
| O(2) | 3116(1) | 4199(1) | 5215(1) | 28(1) |
| N(1) | 5458(1) | 4549(1) | 4485(1) | 19(1) |
| C(1) | 5391(2) | 5672(2) | 4068(1) | 20(1) |
| C(2) | 5738(2) | 5800(2) | 3007(1) | 19(1) |
| C(3) | 6927(2) | 5427(2) | 2744(1) | 21(1) |
| C(4) | 7262(2) | 5641(2) | 1782(1) | 23(1) |
| C(5) | 6411(2) | 6216(2) | 1074(1) | 23(1) |
| C(6) | 5233(2) | 6591(2) | 1333(2) | 23(1) |
| C(7) | 4899(2) | 6396(2) | 2302(1) | 21(1) |
| C(8) | 5404(2) | 3408(2) | 3915(1) | 23(1) |



|       |         |         |         |       |
|-------|---------|---------|---------|-------|
| C(9)  | 6522(2) | 2588(2) | 4259(2) | 30(1) |
| C(10) | 6619(2) | 2399(2) | 5387(2) | 30(1) |
| C(11) | 5455(2) | 2095(2) | 5901(2) | 29(1) |
| C(12) | 6061(2) | 3343(2) | 6038(2) | 25(1) |
| C(13) | 5377(2) | 4469(2) | 5566(1) | 19(1) |
| C(14) | 4000(2) | 4432(2) | 5835(1) | 19(1) |
| C(15) | 3813(2) | 4580(2) | 6925(1) | 19(1) |
| C(16) | 4482(2) | 5451(2) | 7521(1) | 23(1) |
| C(17) | 4258(2) | 5590(2) | 8520(2) | 27(1) |
| C(18) | 3401(2) | 4830(2) | 8938(1) | 24(1) |
| C(19) | 2748(2) | 3945(2) | 8353(2) | 25(1) |
| C(20) | 2933(2) | 3834(2) | 7342(1) | 22(1) |

Table S3C. Bond lengths [ $\text{\AA}$ ] and angles [ $^\circ$ ] for **3b**.

|             |          |
|-------------|----------|
| O(1)-C(1)   | 1.228(2) |
| O(2)-C(14)  | 1.214(2) |
| N(1)-C(1)   | 1.353(2) |
| N(1)-C(13)  | 1.458(2) |
| N(1)-C(8)   | 1.465(2) |
| C(1)-C(2)   | 1.504(2) |
| C(2)-C(7)   | 1.392(3) |
| C(2)-C(3)   | 1.394(3) |
| C(3)-C(4)   | 1.386(3) |
| C(4)-C(5)   | 1.391(3) |
| C(5)-C(6)   | 1.383(3) |
| C(6)-C(7)   | 1.391(3) |
| C(8)-C(9)   | 1.518(3) |
| C(9)-C(10)  | 1.515(3) |
| C(10)-C(11) | 1.499(3) |
| C(10)-C(12) | 1.509(3) |
| C(11)-C(12) | 1.516(3) |
| C(12)-C(13) | 1.536(3) |
| C(13)-C(14) | 1.527(3) |
| C(14)-C(15) | 1.499(2) |
| C(15)-C(16) | 1.392(3) |
| C(15)-C(20) | 1.393(3) |
| C(16)-C(17) | 1.387(3) |
| C(17)-C(18) | 1.386(3) |

|                   |            |
|-------------------|------------|
| C(18)-C(19)       | 1.389(3)   |
| C(19)-C(20)       | 1.388(3)   |
| C(1)-N(1)-C(13)   | 117.24(15) |
| C(1)-N(1)-C(8)    | 124.59(14) |
| C(13)-N(1)-C(8)   | 117.44(15) |
| O(1)-C(1)-N(1)    | 122.31(16) |
| O(1)-C(1)-C(2)    | 119.87(17) |
| N(1)-C(1)-C(2)    | 117.77(15) |
| C(7)-C(2)-C(3)    | 119.61(17) |
| C(7)-C(2)-C(1)    | 119.12(17) |
| C(3)-C(2)-C(1)    | 121.03(16) |
| C(4)-C(3)-C(2)    | 119.94(17) |
| C(3)-C(4)-C(5)    | 120.27(18) |
| C(6)-C(5)-C(4)    | 119.99(17) |
| C(5)-C(6)-C(7)    | 119.97(18) |
| C(6)-C(7)-C(2)    | 120.19(18) |
| N(1)-C(8)-C(9)    | 111.04(16) |
| C(10)-C(9)-C(8)   | 111.08(16) |
| C(11)-C(10)-C(12) | 60.53(14)  |
| C(11)-C(10)-C(9)  | 120.38(18) |
| C(12)-C(10)-C(9)  | 119.11(17) |
| C(10)-C(11)-C(12) | 60.05(14)  |
| C(10)-C(12)-C(11) | 59.42(14)  |
| C(10)-C(12)-C(13) | 120.65(16) |
| C(11)-C(12)-C(13) | 120.22(16) |
| N(1)-C(13)-C(14)  | 112.45(14) |
| N(1)-C(13)-C(12)  | 112.70(15) |
| C(14)-C(13)-C(12) | 107.46(15) |
| O(2)-C(14)-C(15)  | 121.59(17) |
| O(2)-C(14)-C(13)  | 121.92(17) |
| C(15)-C(14)-C(13) | 116.24(15) |
| C(16)-C(15)-C(20) | 119.64(17) |
| C(16)-C(15)-C(14) | 121.68(16) |
| C(20)-C(15)-C(14) | 118.68(17) |
| C(17)-C(16)-C(15) | 120.23(17) |
| C(18)-C(17)-C(16) | 119.94(18) |
| C(17)-C(18)-C(19) | 120.10(17) |
| C(20)-C(19)-C(18) | 120.11(18) |
| C(19)-C(20)-C(15) | 119.91(18) |

---

Symmetry transformations used to generate equivalent atoms:

Table S3D. Anisotropic displacement parameters ( $\text{\AA}^2 \times 10^3$ ) for **3b**. The anisotropic displacement factor exponent takes the form:  $-2\pi^2 [ h^2 a^* 2 U^{11} + \dots + 2 h k a^* b^* U^{12} ]$

---

|       | $U^{11}$ | $U^{22}$ | $U^{33}$ | $U^{23}$ | $U^{13}$ | $U^{12}$ |
|-------|----------|----------|----------|----------|----------|----------|
| O(1)  | 41(1)    | 25(1)    | 19(1)    | -2(1)    | 5(1)     | 8(1)     |
| O(2)  | 21(1)    | 44(1)    | 19(1)    | -3(1)    | -1(1)    | 1(1)     |
| N(1)  | 24(1)    | 20(1)    | 14(1)    | 0(1)     | 3(1)     | 0(1)     |
| C(1)  | 21(1)    | 22(1)    | 17(1)    | -2(1)    | 1(1)     | 1(1)     |
| C(2)  | 24(1)    | 15(1)    | 16(1)    | -2(1)    | 1(1)     | -3(1)    |
| C(3)  | 23(1)    | 19(1)    | 20(1)    | 0(1)     | 1(1)     | -1(1)    |
| C(4)  | 26(1)    | 20(1)    | 23(1)    | -2(1)    | 6(1)     | -2(1)    |
| C(5)  | 30(1)    | 22(1)    | 17(1)    | 1(1)     | 6(1)     | -6(1)    |
| C(6)  | 26(1)    | 23(1)    | 18(1)    | 3(1)     | -2(1)    | -4(1)    |
| C(7)  | 21(1)    | 21(1)    | 21(1)    | 2(1)     | 3(1)     | -1(1)    |
| C(8)  | 32(1)    | 21(1)    | 17(1)    | -2(1)    | 6(1)     | -3(1)    |
| C(9)  | 37(1)    | 26(1)    | 29(1)    | 2(1)     | 14(1)    | 6(1)     |
| C(10) | 28(1)    | 34(1)    | 29(1)    | 7(1)     | 8(1)     | 11(1)    |
| C(11) | 35(1)    | 28(1)    | 25(1)    | 10(1)    | 8(1)     | 7(1)     |
| C(12) | 22(1)    | 33(1)    | 19(1)    | 3(1)     | 2(1)     | 5(1)     |
| C(13) | 20(1)    | 25(1)    | 14(1)    | -1(1)    | 2(1)     | -1(1)    |
| C(14) | 22(1)    | 20(1)    | 17(1)    | 1(1)     | 1(1)     | 3(1)     |
| C(15) | 19(1)    | 20(1)    | 17(1)    | 1(1)     | 3(1)     | 4(1)     |
| C(16) | 25(1)    | 23(1)    | 21(1)    | 0(1)     | 6(1)     | -4(1)    |
| C(17) | 29(1)    | 27(1)    | 24(1)    | -7(1)    | 5(1)     | -3(1)    |
| C(18) | 30(1)    | 28(1)    | 16(1)    | -1(1)    | 7(1)     | 4(1)     |
| C(19) | 25(1)    | 25(1)    | 26(1)    | 2(1)     | 9(1)     | -1(1)    |
| C(20) | 22(1)    | 22(1)    | 24(1)    | -2(1)    | 3(1)     | -1(1)    |

---

Table S3E. Hydrogen coordinates ( $\times 10^4$ ) and isotropic displacement parameters ( $\text{\AA}^2 \times 10^3$ ) for **3b**.

---

|      | x    | y    | z    | U(eq) |
|------|------|------|------|-------|
| H(3) | 7506 | 5026 | 3223 | 25    |

---

|        |      |      |      |    |
|--------|------|------|------|----|
| H(4)   | 8076 | 5394 | 1605 | 28 |
| H(5)   | 6641 | 6351 | 413  | 27 |
| H(6)   | 4651 | 6982 | 849  | 27 |
| H(7)   | 4096 | 6670 | 2484 | 25 |
| H(8A)  | 5418 | 3589 | 3191 | 28 |
| H(8B)  | 4595 | 2981 | 4007 | 28 |
| H(9A)  | 6413 | 1790 | 3917 | 36 |
| H(9B)  | 7322 | 2958 | 4070 | 36 |
| H(10)  | 7429 | 2013 | 5684 | 36 |
| H(11A) | 5555 | 1525 | 6476 | 35 |
| H(11B) | 4631 | 2034 | 5480 | 35 |
| H(12)  | 6552 | 3484 | 6705 | 30 |
| H(13)  | 5794 | 5209 | 5885 | 23 |
| H(16)  | 5094 | 5952 | 7242 | 27 |
| H(17)  | 4691 | 6207 | 8917 | 32 |
| H(18)  | 3261 | 4913 | 9626 | 29 |
| H(19)  | 2173 | 3414 | 8644 | 30 |
| H(20)  | 2460 | 3250 | 6936 | 27 |

Table S3F. Torsion angles [°] for **3b**.

|                      |             |
|----------------------|-------------|
| C(13)-N(1)-C(1)-O(1) | -9.6(3)     |
| C(8)-N(1)-C(1)-O(1)  | 160.28(19)  |
| C(13)-N(1)-C(1)-C(2) | 167.81(15)  |
| C(8)-N(1)-C(1)-C(2)  | -22.3(3)    |
| O(1)-C(1)-C(2)-C(7)  | -53.6(3)    |
| N(1)-C(1)-C(2)-C(7)  | 128.95(18)  |
| O(1)-C(1)-C(2)-C(3)  | 120.9(2)    |
| N(1)-C(1)-C(2)-C(3)  | -56.6(2)    |
| C(7)-C(2)-C(3)-C(4)  | -0.5(3)     |
| C(1)-C(2)-C(3)-C(4)  | -174.93(18) |
| C(2)-C(3)-C(4)-C(5)  | -0.7(3)     |
| C(3)-C(4)-C(5)-C(6)  | 0.9(3)      |
| C(4)-C(5)-C(6)-C(7)  | 0.2(3)      |
| C(5)-C(6)-C(7)-C(2)  | -1.4(3)     |
| C(3)-C(2)-C(7)-C(6)  | 1.6(3)      |
| C(1)-C(2)-C(7)-C(6)  | 176.07(16)  |
| C(1)-N(1)-C(8)-C(9)  | 127.76(18)  |
| C(13)-N(1)-C(8)-C(9) | -62.4(2)    |

|                         |             |
|-------------------------|-------------|
| N(1)-C(8)-C(9)-C(10)    | 52.9(2)     |
| C(8)-C(9)-C(10)-C(11)   | 46.4(3)     |
| C(8)-C(9)-C(10)-C(12)   | -24.6(3)    |
| C(9)-C(10)-C(11)-C(12)  | -108.4(2)   |
| C(9)-C(10)-C(12)-C(11)  | 110.5(2)    |
| C(11)-C(10)-C(12)-C(13) | -109.2(2)   |
| C(9)-C(10)-C(12)-C(13)  | 1.3(3)      |
| C(10)-C(11)-C(12)-C(13) | 109.9(2)    |
| C(1)-N(1)-C(13)-C(14)   | 85.34(19)   |
| C(8)-N(1)-C(13)-C(14)   | -85.29(19)  |
| C(1)-N(1)-C(13)-C(12)   | -153.01(16) |
| C(8)-N(1)-C(13)-C(12)   | 36.4(2)     |
| C(10)-C(12)-C(13)-N(1)  | -5.6(3)     |
| C(11)-C(12)-C(13)-N(1)  | -75.8(2)    |
| C(10)-C(12)-C(13)-C(14) | 118.81(19)  |
| C(11)-C(12)-C(13)-C(14) | 48.6(2)     |
| N(1)-C(13)-C(14)-O(2)   | 16.5(3)     |
| C(12)-C(13)-C(14)-O(2)  | -108.1(2)   |
| N(1)-C(13)-C(14)-C(15)  | -169.16(15) |
| C(12)-C(13)-C(14)-C(15) | 66.3(2)     |
| O(2)-C(14)-C(15)-C(16)  | -142.35(19) |
| C(13)-C(14)-C(15)-C(16) | 43.3(2)     |
| O(2)-C(14)-C(15)-C(20)  | 36.8(3)     |
| C(13)-C(14)-C(15)-C(20) | -137.53(18) |
| C(20)-C(15)-C(16)-C(17) | -1.2(3)     |
| C(14)-C(15)-C(16)-C(17) | 178.02(18)  |
| C(15)-C(16)-C(17)-C(18) | 2.5(3)      |
| C(16)-C(17)-C(18)-C(19) | -1.3(3)     |
| C(17)-C(18)-C(19)-C(20) | -1.2(3)     |
| C(18)-C(19)-C(20)-C(15) | 2.5(3)      |
| C(16)-C(15)-C(20)-C(19) | -1.3(3)     |
| C(14)-C(15)-C(20)-C(19) | 179.46(16)  |

---

Symmetry transformations used to generate equivalent atoms:

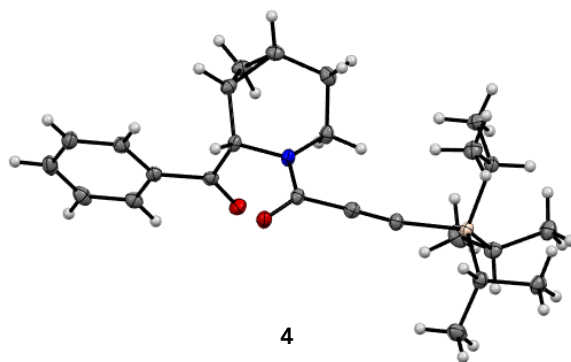

**Figure S11.** Single crystal XRD structure of **4**. Ortep drawn at 50% probability level.

Table S4A. Crystal data and structure refinement for **4**.

|                                 |                                                     |                   |
|---------------------------------|-----------------------------------------------------|-------------------|
| Identification code             | CRoberts02_Sarpong                                  |                   |
| Empirical formula               | C <sub>25</sub> H <sub>35</sub> N O <sub>2</sub> Si |                   |
| Formula weight                  | 409.63                                              |                   |
| Temperature                     | 100(2) K                                            |                   |
| Wavelength                      | 1.54184 Å                                           |                   |
| Crystal system                  | Triclinic                                           |                   |
| Space group                     | P -1                                                |                   |
| Unit cell dimensions            | a = 7.43610(10) Å                                   | α = 87.3720(10)°. |
|                                 | b = 9.47820(10) Å                                   | β = 83.4540(10)°. |
|                                 | c = 16.67800(10) Å                                  | γ = 79.7650(10)°. |
| Volume                          | 1148.84(2) Å <sup>3</sup>                           |                   |
| Z                               | 2                                                   |                   |
| Density (calculated)            | 1.184 Mg/m <sup>3</sup>                             |                   |
| Absorption coefficient          | 1.048 mm <sup>-1</sup>                              |                   |
| F(000)                          | 444                                                 |                   |
| Crystal size                    | 0.400 x 0.210 x 0.170 mm <sup>3</sup>               |                   |
| Theta range for data collection | 4.743 to 74.503°.                                   |                   |
| Index ranges                    | -9 ≤ h ≤ 9, -10 ≤ k ≤ 11, -20 ≤ l ≤ 20              |                   |
| Reflections collected           | 45287                                               |                   |
| Independent reflections         | 4698 [R(int) = 0.0314]                              |                   |
| Completeness to theta = 74.000° | 99.8 %                                              |                   |
| Absorption correction           | Semi-empirical from equivalents                     |                   |
| Max. and min. transmission      | 1.00000 and 0.87599                                 |                   |
| Refinement method               | Full-matrix least-squares on F <sup>2</sup>         |                   |
| Data / restraints / parameters  | 4698 / 0 / 268                                      |                   |

|                                      |                                       |
|--------------------------------------|---------------------------------------|
| Goodness-of-fit on $F^2$             | 1.051                                 |
| Final R indices [ $I > 2\sigma(I)$ ] | $R_1 = 0.0336$ , $wR_2 = 0.0846$      |
| R indices (all data)                 | $R_1 = 0.0337$ , $wR_2 = 0.0847$      |
| Extinction coefficient               | n/a                                   |
| Largest diff. peak and hole          | 0.339 and -0.301 e. $\text{\AA}^{-3}$ |

Table S4B. Atomic coordinates ( $\times 10^4$ ) and equivalent isotropic displacement parameters ( $\text{\AA}^2 \times 10^3$ ) for **4**.  $U(\text{eq})$  is defined as one third of the trace of the orthogonalized  $U^{ij}$  tensor.

|       | x       | y       | z        | $U(\text{eq})$ |
|-------|---------|---------|----------|----------------|
| Si(1) | 3730(1) | 2908(1) | 8512(1)  | 15(1)          |
| O(1)  | 48(1)   | 3814(1) | 5955(1)  | 21(1)          |
| O(2)  | 1915(1) | 653(1)  | 4898(1)  | 22(1)          |
| N(1)  | 2997(1) | 2938(1) | 5455(1)  | 17(1)          |
| C(1)  | 2666(2) | 3086(1) | 7553(1)  | 18(1)          |
| C(2)  | 2235(2) | 3185(1) | 6876(1)  | 18(1)          |
| C(3)  | 1660(2) | 3327(1) | 6059(1)  | 16(1)          |
| C(4)  | 4860(2) | 2192(1) | 5572(1)  | 19(1)          |
| C(5)  | 6290(2) | 2993(1) | 5126(1)  | 22(1)          |
| C(6)  | 5974(2) | 3273(1) | 4250(1)  | 20(1)          |
| C(7)  | 5625(2) | 2087(1) | 3753(1)  | 21(1)          |
| C(8)  | 4071(2) | 3292(1) | 4007(1)  | 18(1)          |
| C(9)  | 2474(2) | 3052(1) | 4632(1)  | 16(1)          |
| C(10) | 1753(2) | 1694(1) | 4442(1)  | 17(1)          |
| C(11) | 936(2)  | 1664(1) | 3661(1)  | 17(1)          |
| C(12) | 524(2)  | 365(1)  | 3435(1)  | 21(1)          |
| C(13) | -160(2) | 272(1)  | 2703(1)  | 24(1)          |
| C(14) | -439(2) | 1472(2) | 2191(1)  | 25(1)          |
| C(15) | -79(2)  | 2774(1) | 2421(1)  | 23(1)          |
| C(16) | 598(2)  | 2878(1) | 3156(1)  | 20(1)          |
| C(17) | 5577(2) | 4053(1) | 8359(1)  | 18(1)          |
| C(18) | 4766(2) | 5652(1) | 8264(1)  | 23(1)          |
| C(19) | 6988(2) | 3578(1) | 7634(1)  | 24(1)          |
| C(20) | 4680(2) | 951(1)  | 8708(1)  | 21(1)          |
| C(21) | 6381(2) | 771(1)  | 9176(1)  | 24(1)          |
| C(22) | 5095(2) | 50(1)   | 7948(1)  | 28(1)          |
| C(23) | 1899(2) | 3604(1) | 9345(1)  | 19(1)          |
| C(24) | 2705(2) | 3650(1) | 10150(1) | 23(1)          |

Table S4C. Bond lengths [Å] and angles [°] for **4**.

|                   |            |
|-------------------|------------|
| Si(1)-C(1)        | 1.8512(12) |
| Si(1)-C(17)       | 1.8849(12) |
| Si(1)-C(23)       | 1.8853(12) |
| Si(1)-C(20)       | 1.8917(12) |
| O(1)-C(3)         | 1.2336(14) |
| O(2)-C(10)        | 1.2156(14) |
| N(1)-C(3)         | 1.3471(15) |
| N(1)-C(9)         | 1.4619(14) |
| N(1)-C(4)         | 1.4690(14) |
| C(1)-C(2)         | 1.2039(17) |
| C(2)-C(3)         | 1.4679(15) |
| C(4)-C(5)         | 1.5216(17) |
| C(5)-C(6)         | 1.5102(17) |
| C(6)-C(7)         | 1.5017(16) |
| C(6)-C(8)         | 1.5123(16) |
| C(7)-C(8)         | 1.5113(16) |
| C(8)-C(9)         | 1.5299(16) |
| C(9)-C(10)        | 1.5389(16) |
| C(10)-C(11)       | 1.5008(15) |
| C(11)-C(16)       | 1.3975(16) |
| C(11)-C(12)       | 1.3984(17) |
| C(12)-C(13)       | 1.3873(18) |
| C(13)-C(14)       | 1.3901(19) |
| C(14)-C(15)       | 1.3888(19) |
| C(15)-C(16)       | 1.3906(17) |
| C(17)-C(18)       | 1.5361(16) |
| C(17)-C(19)       | 1.5366(16) |
| C(20)-C(22)       | 1.5314(17) |
| C(20)-C(21)       | 1.5415(17) |
| C(23)-C(25)       | 1.5341(17) |
| C(23)-C(24)       | 1.5363(16) |
| C(1)-Si(1)-C(17)  | 105.25(5)  |
| C(1)-Si(1)-C(23)  | 108.08(5)  |
| C(17)-Si(1)-C(23) | 111.30(5)  |
| C(1)-Si(1)-C(20)  | 108.85(5)  |



|                   |            |
|-------------------|------------|
| C(17)-Si(1)-C(20) | 112.66(5)  |
| C(23)-Si(1)-C(20) | 110.44(5)  |
| C(3)-N(1)-C(9)    | 117.40(9)  |
| C(3)-N(1)-C(4)    | 124.40(9)  |
| C(9)-N(1)-C(4)    | 117.40(9)  |
| C(2)-C(1)-Si(1)   | 170.35(11) |
| C(1)-C(2)-C(3)    | 178.45(12) |
| O(1)-C(3)-N(1)    | 124.00(10) |
| O(1)-C(3)-C(2)    | 120.16(10) |
| N(1)-C(3)-C(2)    | 115.81(10) |
| N(1)-C(4)-C(5)    | 110.44(9)  |
| C(6)-C(5)-C(4)    | 111.49(10) |
| C(7)-C(6)-C(5)    | 120.09(10) |
| C(7)-C(6)-C(8)    | 60.19(8)   |
| C(5)-C(6)-C(8)    | 118.80(10) |
| C(6)-C(7)-C(8)    | 60.26(8)   |
| C(7)-C(8)-C(6)    | 59.56(8)   |
| C(7)-C(8)-C(9)    | 121.69(10) |
| C(6)-C(8)-C(9)    | 121.24(10) |
| N(1)-C(9)-C(8)    | 112.08(9)  |
| N(1)-C(9)-C(10)   | 109.82(9)  |
| C(8)-C(9)-C(10)   | 110.20(9)  |
| O(2)-C(10)-C(11)  | 121.16(10) |
| O(2)-C(10)-C(9)   | 120.42(10) |
| C(11)-C(10)-C(9)  | 118.35(9)  |
| C(16)-C(11)-C(12) | 119.44(11) |
| C(16)-C(11)-C(10) | 122.35(10) |
| C(12)-C(11)-C(10) | 118.21(10) |
| C(13)-C(12)-C(11) | 120.21(11) |
| C(12)-C(13)-C(14) | 120.11(12) |
| C(15)-C(14)-C(13) | 119.98(11) |
| C(14)-C(15)-C(16) | 120.24(12) |
| C(15)-C(16)-C(11) | 119.98(11) |
| C(18)-C(17)-C(19) | 110.03(10) |
| C(18)-C(17)-Si(1) | 111.83(8)  |
| C(19)-C(17)-Si(1) | 111.85(8)  |
| C(22)-C(20)-C(21) | 110.60(10) |
| C(22)-C(20)-Si(1) | 114.11(9)  |
| C(21)-C(20)-Si(1) | 111.49(8)  |

|                   |            |
|-------------------|------------|
| C(25)-C(23)-C(24) | 111.22(10) |
| C(25)-C(23)-Si(1) | 112.26(8)  |
| C(24)-C(23)-Si(1) | 111.63(8)  |

---

Symmetry transformations used to generate equivalent atoms:

Table S4D. Anisotropic displacement parameters ( $\text{\AA}^2 \times 10^3$ ) for **4**. The anisotropic displacement factor exponent takes the form:  $-2\pi^2 [ h^2 a^2 U^{11} + \dots + 2 h k a^* b^* U^{12} ]$

|       | $U^{11}$ | $U^{22}$ | $U^{33}$ | $U^{23}$ | $U^{13}$ | $U^{12}$ |
|-------|----------|----------|----------|----------|----------|----------|
| Si(1) | 18(1)    | 15(1)    | 12(1)    | -1(1)    | -3(1)    | -3(1)    |
| O(1)  | 18(1)    | 26(1)    | 17(1)    | -1(1)    | -3(1)    | 0(1)     |
| O(2)  | 25(1)    | 21(1)    | 22(1)    | 5(1)     | -4(1)    | -6(1)    |
| N(1)  | 18(1)    | 19(1)    | 14(1)    | -1(1)    | -4(1)    | 1(1)     |
| C(1)  | 20(1)    | 18(1)    | 17(1)    | -2(1)    | -3(1)    | -3(1)    |
| C(2)  | 18(1)    | 17(1)    | 18(1)    | -2(1)    | -1(1)    | -2(1)    |
| C(3)  | 20(1)    | 15(1)    | 15(1)    | -1(1)    | -3(1)    | -4(1)    |
| C(4)  | 19(1)    | 20(1)    | 18(1)    | -1(1)    | -4(1)    | 2(1)     |
| C(5)  | 19(1)    | 22(1)    | 26(1)    | -5(1)    | -5(1)    | -2(1)    |
| C(6)  | 20(1)    | 18(1)    | 24(1)    | -1(1)    | 0(1)     | -5(1)    |
| C(7)  | 23(1)    | 19(1)    | 20(1)    | -3(1)    | 3(1)     | -4(1)    |
| C(8)  | 21(1)    | 16(1)    | 16(1)    | -1(1)    | -1(1)    | -4(1)    |
| C(9)  | 19(1)    | 17(1)    | 13(1)    | -1(1)    | -3(1)    | 0(1)     |
| C(10) | 14(1)    | 19(1)    | 16(1)    | -1(1)    | 1(1)     | -1(1)    |
| C(11) | 15(1)    | 21(1)    | 16(1)    | -2(1)    | 0(1)     | -2(1)    |
| C(12) | 18(1)    | 21(1)    | 23(1)    | -2(1)    | 0(1)     | -3(1)    |
| C(13) | 19(1)    | 26(1)    | 28(1)    | -10(1)   | -2(1)    | -4(1)    |
| C(14) | 20(1)    | 37(1)    | 19(1)    | -7(1)    | -4(1)    | -3(1)    |
| C(15) | 22(1)    | 29(1)    | 19(1)    | 1(1)     | -3(1)    | -2(1)    |
| C(16) | 19(1)    | 21(1)    | 18(1)    | -1(1)    | -2(1)    | -3(1)    |
| C(17) | 20(1)    | 17(1)    | 16(1)    | 1(1)     | -4(1)    | -4(1)    |
| C(18) | 28(1)    | 17(1)    | 26(1)    | 1(1)     | -5(1)    | -4(1)    |
| C(19) | 22(1)    | 24(1)    | 24(1)    | 3(1)     | 1(1)     | -5(1)    |
| C(20) | 22(1)    | 17(1)    | 23(1)    | 1(1)     | -2(1)    | -4(1)    |
| C(21) | 27(1)    | 21(1)    | 24(1)    | 4(1)     | -6(1)    | -1(1)    |
| C(22) | 29(1)    | 20(1)    | 36(1)    | -9(1)    | -6(1)    | -1(1)    |
| C(23) | 20(1)    | 20(1)    | 16(1)    | -2(1)    | -1(1)    | -2(1)    |
| C(24) | 27(1)    | 27(1)    | 16(1)    | -4(1)    | -1(1)    | -4(1)    |
| C(25) | 22(1)    | 33(1)    | 27(1)    | -5(1)    | 2(1)     | -7(1)    |

Table S4E. Hydrogen coordinates ( $\times 10^4$ ) and isotropic displacement parameters ( $\text{\AA}^2 \times 10^3$ )

For 4.

|        | x    | y    | z     | U(eq) |
|--------|------|------|-------|-------|
| H(4A)  | 5042 | 1206 | 5369  | 23    |
| H(4B)  | 5013 | 2125 | 6155  | 23    |
| H(5A)  | 6236 | 3918 | 5388  | 26    |
| H(5B)  | 7531 | 2421 | 5159  | 26    |
| H(6)   | 6677 | 3978 | 3952  | 24    |
| H(7A)  | 5606 | 1135 | 4021  | 25    |
| H(7B)  | 6134 | 2061 | 3178  | 25    |
| H(8)   | 3720 | 4003 | 3566  | 21    |
| H(9)   | 1457 | 3891 | 4599  | 19    |
| H(12)  | 713  | -457 | 3784  | 25    |
| H(13)  | -437 | -612 | 2551  | 29    |
| H(14)  | -877 | 1401 | 1683  | 30    |
| H(15)  | -296 | 3598 | 2076  | 28    |
| H(16)  | 831  | 3772 | 3314  | 23    |
| H(17)  | 6243 | 3933 | 8853  | 21    |
| H(18A) | 4050 | 5796 | 7799  | 35    |
| H(18B) | 5765 | 6209 | 8177  | 35    |
| H(18C) | 3965 | 5970 | 8753  | 35    |
| H(19A) | 7520 | 2563 | 7706  | 35    |
| H(19B) | 7966 | 4156 | 7595  | 35    |
| H(19C) | 6380 | 3711 | 7138  | 35    |
| H(20)  | 3708 | 550  | 9065  | 25    |
| H(21A) | 7388 | 1118 | 8838  | 36    |
| H(21B) | 6760 | -245 | 9318  | 36    |
| H(21C) | 6077 | 1326 | 9670  | 36    |
| H(22A) | 3966 | 99   | 7689  | 42    |
| H(22B) | 5562 | -949 | 8097  | 42    |
| H(22C) | 6021 | 425  | 7573  | 42    |
| H(23)  | 1380 | 4614 | 9192  | 23    |
| H(24A) | 3218 | 2674 | 10323 | 35    |
| H(24B) | 1733 | 4073 | 10560 | 35    |
| H(24C) | 3679 | 4233 | 10079 | 35    |
| H(25A) | -211 | 2776 | 8922  | 41    |

|        |      |      |      |    |
|--------|------|------|------|----|
| H(25B) | -649 | 3195 | 9851 | 41 |
| H(25C) | 760  | 1763 | 9600 | 41 |

Table S4F. Torsion angles [°] for **4**.

|                         |             |
|-------------------------|-------------|
| C(9)-N(1)-C(3)-O(1)     | -2.55(17)   |
| C(4)-N(1)-C(3)-O(1)     | -171.97(11) |
| C(9)-N(1)-C(3)-C(2)     | 179.48(9)   |
| C(4)-N(1)-C(3)-C(2)     | 10.06(16)   |
| C(3)-N(1)-C(4)-C(5)     | -127.25(12) |
| C(9)-N(1)-C(4)-C(5)     | 63.33(13)   |
| N(1)-C(4)-C(5)-C(6)     | -52.62(13)  |
| C(4)-C(5)-C(6)-C(7)     | -47.26(14)  |
| C(4)-C(5)-C(6)-C(8)     | 23.04(14)   |
| C(5)-C(6)-C(7)-C(8)     | 108.04(12)  |
| C(6)-C(7)-C(8)-C(9)     | -110.13(12) |
| C(5)-C(6)-C(8)-C(7)     | -110.14(12) |
| C(7)-C(6)-C(8)-C(9)     | 110.86(12)  |
| C(5)-C(6)-C(8)-C(9)     | 0.72(16)    |
| C(3)-N(1)-C(9)-C(8)     | 152.62(10)  |
| C(4)-N(1)-C(9)-C(8)     | -37.20(13)  |
| C(3)-N(1)-C(9)-C(10)    | -84.55(12)  |
| C(4)-N(1)-C(9)-C(10)    | 85.63(12)   |
| C(7)-C(8)-C(9)-N(1)     | 76.08(13)   |
| C(6)-C(8)-C(9)-N(1)     | 4.86(15)    |
| C(7)-C(8)-C(9)-C(10)    | -46.54(14)  |
| C(6)-C(8)-C(9)-C(10)    | -117.76(11) |
| N(1)-C(9)-C(10)-O(2)    | -10.04(15)  |
| C(8)-C(9)-C(10)-O(2)    | 113.90(12)  |
| N(1)-C(9)-C(10)-C(11)   | 173.01(9)   |
| C(8)-C(9)-C(10)-C(11)   | -63.05(13)  |
| O(2)-C(10)-C(11)-C(16)  | 174.78(11)  |
| C(9)-C(10)-C(11)-C(16)  | -8.30(16)   |
| O(2)-C(10)-C(11)-C(12)  | -5.91(16)   |
| C(9)-C(10)-C(11)-C(12)  | 171.01(10)  |
| C(16)-C(11)-C(12)-C(13) | 2.04(17)    |
| C(10)-C(11)-C(12)-C(13) | -177.29(10) |
| C(11)-C(12)-C(13)-C(14) | -0.04(18)   |
| C(12)-C(13)-C(14)-C(15) | -1.67(19)   |

|                         |            |
|-------------------------|------------|
| C(13)-C(14)-C(15)-C(16) | 1.36(19)   |
| C(14)-C(15)-C(16)-C(11) | 0.66(18)   |
| C(12)-C(11)-C(16)-C(15) | -2.35(17)  |
| C(10)-C(11)-C(16)-C(15) | 176.95(11) |
| C(1)-Si(1)-C(17)-C(18)  | 65.74(9)   |
| C(23)-Si(1)-C(17)-C(18) | -51.11(10) |
| C(20)-Si(1)-C(17)-C(18) | -175.79(8) |
| C(1)-Si(1)-C(17)-C(19)  | -58.19(9)  |
| C(23)-Si(1)-C(17)-C(19) | -175.03(8) |
| C(20)-Si(1)-C(17)-C(19) | 60.28(9)   |
| C(1)-Si(1)-C(20)-C(22)  | 23.14(11)  |
| C(17)-Si(1)-C(20)-C(22) | -93.21(10) |
| C(23)-Si(1)-C(20)-C(22) | 141.64(9)  |
| C(1)-Si(1)-C(20)-C(21)  | 149.33(9)  |
| C(17)-Si(1)-C(20)-C(21) | 32.98(10)  |
| C(23)-Si(1)-C(20)-C(21) | -92.17(9)  |
| C(1)-Si(1)-C(23)-C(25)  | 60.54(10)  |
| C(17)-Si(1)-C(23)-C(25) | 175.64(8)  |
| C(20)-Si(1)-C(23)-C(25) | -58.43(10) |
| C(1)-Si(1)-C(23)-C(24)  | -173.80(8) |
| C(17)-Si(1)-C(23)-C(24) | -58.69(10) |
| C(20)-Si(1)-C(23)-C(24) | 67.23(10)  |

---

Symmetry transformations used to generate equivalent atoms:

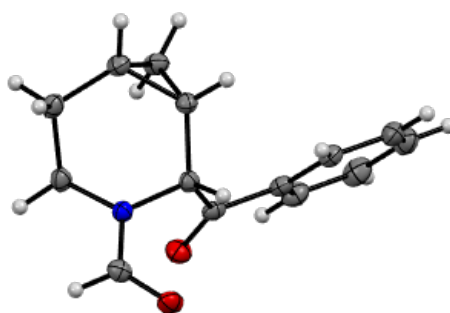

5

**Figure S12.** Single crystal XRD structure of **4**. Ortep drawn at 50% probability level.

Table S5A. Crystal data and structure refinement for **5**.

|                                 |                                                  |                    |
|---------------------------------|--------------------------------------------------|--------------------|
| Identification code             | CRoberts03_Sarpong                               |                    |
| Empirical formula               | C <sub>14</sub> H <sub>15</sub> N O <sub>2</sub> |                    |
| Formula weight                  | 229.27                                           |                    |
| Temperature                     | 100(2) K                                         |                    |
| Wavelength                      | 1.54184 Å                                        |                    |
| Crystal system                  | Monoclinic                                       |                    |
| Space group                     | P 21/c                                           |                    |
| Unit cell dimensions            | a = 13.1623(2) Å                                 | α = 90°.           |
|                                 | b = 7.55710(10) Å                                | β = 108.5650(10)°. |
|                                 | c = 12.35190(10) Å                               | γ = 90°.           |
| Volume                          | 1164.69(3) Å <sup>3</sup>                        |                    |
| Z                               | 4                                                |                    |
| Density (calculated)            | 1.308 Mg/m <sup>3</sup>                          |                    |
| Absorption coefficient          | 0.704 mm <sup>-1</sup>                           |                    |
| F(000)                          | 488                                              |                    |
| Crystal size                    | 0.180 x 0.120 x 0.070 mm <sup>3</sup>            |                    |
| Theta range for data collection | 3.542 to 74.450°.                                |                    |
| Index ranges                    | -16 ≤ h ≤ 16, -9 ≤ k ≤ 9, -13 ≤ l ≤ 15           |                    |
| Reflections collected           | 14327                                            |                    |
| Independent reflections         | 2378 [R(int) = 0.0279]                           |                    |
| Completeness to theta = 74.000° | 99.9 %                                           |                    |
| Absorption correction           | Semi-empirical from equivalents                  |                    |
| Max. and min. transmission      | 1.00000 and 0.69768                              |                    |
| Refinement method               | Full-matrix least-squares on F <sup>2</sup>      |                    |
| Data / restraints / parameters  | 2378 / 0 / 154                                   |                    |

|                                   |                                    |
|-----------------------------------|------------------------------------|
| Goodness-of-fit on F <sup>2</sup> | 1.049                              |
| Final R indices [I>2sigma(I)]     | R1 = 0.0340, wR2 = 0.0887          |
| R indices (all data)              | R1 = 0.0357, wR2 = 0.0901          |
| Extinction coefficient            | n/a                                |
| Largest diff. peak and hole       | 0.243 and -0.182 e.Å <sup>-3</sup> |

Table S5B. Atomic coordinates ( $\times 10^4$ ) and equivalent isotropic displacement parameters ( $\text{\AA}^2 \times 10^3$ ) for **5**. U(eq) is defined as one third of the trace of the orthogonalized U<sup>ij</sup> tensor.

|       | x       | y       | z       | U(eq) |
|-------|---------|---------|---------|-------|
| O(1)  | 4986(1) | 4684(1) | 3479(1) | 26(1) |
| O(2)  | 2148(1) | 4247(1) | 2477(1) | 26(1) |
| N(1)  | 3902(1) | 2372(1) | 3554(1) | 19(1) |
| C(1)  | 4647(1) | 3175(1) | 3203(1) | 21(1) |
| C(2)  | 3467(1) | 639(1)  | 3114(1) | 22(1) |
| C(3)  | 3602(1) | -664(1) | 4092(1) | 23(1) |
| C(4)  | 3206(1) | 98(1)   | 5018(1) | 22(1) |
| C(5)  | 2113(1) | 923(1)  | 4713(1) | 23(1) |
| C(6)  | 3096(1) | 2086(1) | 5100(1) | 19(1) |
| C(7)  | 3392(1) | 3323(1) | 4270(1) | 18(1) |
| C(8)  | 2409(1) | 4339(1) | 3513(1) | 19(1) |
| C(9)  | 1773(1) | 5398(1) | 4090(1) | 20(1) |
| C(10) | 2198(1) | 5937(1) | 5227(1) | 21(1) |
| C(11) | 1582(1) | 6925(1) | 5731(1) | 25(1) |
| C(12) | 537(1)  | 7372(2) | 5108(1) | 29(1) |
| C(13) | 110(1)  | 6853(2) | 3976(1) | 31(1) |
| C(14) | 723(1)  | 5876(2) | 3464(1) | 26(1) |

Table S5C. Bond lengths [ $\text{\AA}$ ] and angles [ $^\circ$ ] for **5**.

|           |            |
|-----------|------------|
| O(1)-C(1) | 1.2320(13) |
| O(2)-C(8) | 1.2166(13) |
| N(1)-C(1) | 1.3377(13) |
| N(1)-C(7) | 1.4578(12) |
| N(1)-C(2) | 1.4629(13) |
| C(2)-C(3) | 1.5243(15) |
| C(3)-C(4) | 1.5128(15) |
| C(4)-C(5) | 1.5017(15) |



|                   |            |
|-------------------|------------|
| C(4)-C(6)         | 1.5156(14) |
| C(5)-C(6)         | 1.5100(15) |
| C(6)-C(7)         | 1.5272(13) |
| C(7)-C(8)         | 1.5388(13) |
| C(8)-C(9)         | 1.4933(14) |
| C(9)-C(10)        | 1.3967(15) |
| C(9)-C(14)        | 1.3992(15) |
| C(10)-C(11)       | 1.3869(15) |
| C(11)-C(12)       | 1.3881(16) |
| C(12)-C(13)       | 1.3872(18) |
| C(13)-C(14)       | 1.3855(17) |
| C(1)-N(1)-C(7)    | 119.94(8)  |
| C(1)-N(1)-C(2)    | 121.78(8)  |
| C(7)-N(1)-C(2)    | 117.74(8)  |
| O(1)-C(1)-N(1)    | 124.66(10) |
| N(1)-C(2)-C(3)    | 110.52(8)  |
| C(4)-C(3)-C(2)    | 111.83(9)  |
| C(5)-C(4)-C(3)    | 120.10(9)  |
| C(5)-C(4)-C(6)    | 60.06(7)   |
| C(3)-C(4)-C(6)    | 119.40(9)  |
| C(4)-C(5)-C(6)    | 60.43(7)   |
| C(5)-C(6)-C(4)    | 59.52(7)   |
| C(5)-C(6)-C(7)    | 121.35(8)  |
| C(4)-C(6)-C(7)    | 120.77(8)  |
| N(1)-C(7)-C(6)    | 111.74(8)  |
| N(1)-C(7)-C(8)    | 109.75(8)  |
| C(6)-C(7)-C(8)    | 111.59(8)  |
| O(2)-C(8)-C(9)    | 121.28(9)  |
| O(2)-C(8)-C(7)    | 120.75(9)  |
| C(9)-C(8)-C(7)    | 117.95(8)  |
| C(10)-C(9)-C(14)  | 119.29(10) |
| C(10)-C(9)-C(8)   | 121.99(9)  |
| C(14)-C(9)-C(8)   | 118.72(9)  |
| C(11)-C(10)-C(9)  | 120.28(10) |
| C(10)-C(11)-C(12) | 119.98(10) |
| C(13)-C(12)-C(11) | 120.16(11) |
| C(14)-C(13)-C(12) | 120.15(10) |
| C(13)-C(14)-C(9)  | 120.13(11) |

Symmetry transformations used to generate equivalent atoms:

Table S5D. Anisotropic displacement parameters ( $\text{\AA}^2 \times 10^3$ ) for **5**. The anisotropic displacement factor exponent takes the form:  $-2\pi^2 [h^2 a^2 U^{11} + \dots + 2 h k a^* b^* U^{12}]$

|       | $U^{11}$ | $U^{22}$ | $U^{33}$ | $U^{23}$ | $U^{13}$ | $U^{12}$ |
|-------|----------|----------|----------|----------|----------|----------|
| O(1)  | 27(1)    | 26(1)    | 25(1)    | -2(1)    | 10(1)    | -9(1)    |
| O(2)  | 29(1)    | 28(1)    | 19(1)    | 2(1)     | 5(1)     | 0(1)     |
| N(1)  | 20(1)    | 18(1)    | 20(1)    | -2(1)    | 8(1)     | -2(1)    |
| C(1)  | 19(1)    | 25(1)    | 19(1)    | 1(1)     | 5(1)     | -1(1)    |
| C(2)  | 22(1)    | 20(1)    | 23(1)    | -6(1)    | 9(1)     | -4(1)    |
| C(3)  | 24(1)    | 18(1)    | 28(1)    | -2(1)    | 9(1)     | -2(1)    |
| C(4)  | 23(1)    | 19(1)    | 23(1)    | 3(1)     | 8(1)     | 0(1)     |
| C(5)  | 22(1)    | 23(1)    | 26(1)    | 5(1)     | 10(1)    | -1(1)    |
| C(6)  | 22(1)    | 19(1)    | 18(1)    | 2(1)     | 7(1)     | 2(1)     |
| C(7)  | 17(1)    | 17(1)    | 18(1)    | -2(1)    | 6(1)     | -1(1)    |
| C(8)  | 20(1)    | 16(1)    | 20(1)    | 2(1)     | 5(1)     | -4(1)    |
| C(9)  | 20(1)    | 16(1)    | 24(1)    | 4(1)     | 7(1)     | -1(1)    |
| C(10) | 21(1)    | 17(1)    | 24(1)    | 2(1)     | 6(1)     | 0(1)     |
| C(11) | 30(1)    | 19(1)    | 29(1)    | 1(1)     | 12(1)    | 1(1)     |
| C(12) | 29(1)    | 21(1)    | 42(1)    | 3(1)     | 18(1)    | 5(1)     |
| C(13) | 22(1)    | 26(1)    | 42(1)    | 7(1)     | 7(1)     | 6(1)     |
| C(14) | 23(1)    | 24(1)    | 28(1)    | 5(1)     | 4(1)     | 1(1)     |

Table S5E. Hydrogen coordinates ( $\times 10^4$ ) and isotropic displacement parameters ( $\text{\AA}^2 \times 10^3$ ) for **5**.

|       | x    | y     | z    | U(eq) |
|-------|------|-------|------|-------|
| H(1)  | 4936 | 2537  | 2706 | 25    |
| H(2A) | 3843 | 184   | 2593 | 26    |
| H(2B) | 2697 | 758   | 2673 | 26    |
| H(3A) | 3198 | -1760 | 3791 | 28    |
| H(3B) | 4368 | -979  | 4424 | 28    |
| H(4)  | 3446 | -544  | 5764 | 26    |
| H(5A) | 1698 | 749   | 5247 | 28    |
| H(5B) | 1677 | 962   | 3896 | 28    |

|       |      |      |      |    |
|-------|------|------|------|----|
| H(6)  | 3267 | 2552 | 5896 | 23 |
| H(7)  | 3918 | 4210 | 4730 | 21 |
| H(10) | 2912 | 5625 | 5656 | 25 |
| H(11) | 1876 | 7295 | 6503 | 30 |
| H(12) | 112  | 8034 | 5457 | 35 |
| H(13) | -605 | 7169 | 3550 | 37 |
| H(14) | 429  | 5531 | 2687 | 31 |

Table S5F. Torsion angles [°] for **5**.

|                        |             |
|------------------------|-------------|
| C(7)-N(1)-C(1)-O(1)    | 3.15(15)    |
| C(2)-N(1)-C(1)-O(1)    | 174.45(9)   |
| C(1)-N(1)-C(2)-C(3)    | 124.66(10)  |
| C(7)-N(1)-C(2)-C(3)    | -63.85(11)  |
| N(1)-C(2)-C(3)-C(4)    | 49.59(12)   |
| C(2)-C(3)-C(4)-C(5)    | 50.23(13)   |
| C(2)-C(3)-C(4)-C(6)    | -20.17(13)  |
| C(3)-C(4)-C(5)-C(6)    | -108.72(10) |
| C(4)-C(5)-C(6)-C(7)    | 109.66(10)  |
| C(3)-C(4)-C(6)-C(5)    | 109.86(11)  |
| C(5)-C(4)-C(6)-C(7)    | -110.62(10) |
| C(3)-C(4)-C(6)-C(7)    | -0.76(14)   |
| C(1)-N(1)-C(7)-C(6)    | -147.78(9)  |
| C(2)-N(1)-C(7)-C(6)    | 40.57(11)   |
| C(1)-N(1)-C(7)-C(8)    | 87.89(10)   |
| C(2)-N(1)-C(7)-C(8)    | -83.76(10)  |
| C(5)-C(6)-C(7)-N(1)    | -78.49(11)  |
| C(4)-C(6)-C(7)-N(1)    | -7.68(13)   |
| C(5)-C(6)-C(7)-C(8)    | 44.80(12)   |
| C(4)-C(6)-C(7)-C(8)    | 115.62(10)  |
| N(1)-C(7)-C(8)-O(2)    | 1.35(13)    |
| C(6)-C(7)-C(8)-O(2)    | -123.07(10) |
| N(1)-C(7)-C(8)-C(9)    | 179.80(8)   |
| C(6)-C(7)-C(8)-C(9)    | 55.38(11)   |
| O(2)-C(8)-C(9)-C(10)   | -161.55(10) |
| C(7)-C(8)-C(9)-C(10)   | 20.01(14)   |
| O(2)-C(8)-C(9)-C(14)   | 17.77(15)   |
| C(7)-C(8)-C(9)-C(14)   | -160.67(9)  |
| C(14)-C(9)-C(10)-C(11) | 0.45        |

|                         |            |
|-------------------------|------------|
| C(8)-C(9)-C(10)-C(11)   | 179.77(9)  |
| C(9)-C(10)-C(11)-C(12)  | 0.42(16)   |
| C(10)-C(11)-C(12)-C(13) | -0.87(17)  |
| C(11)-C(12)-C(13)-C(14) | 0.44(18)   |
| C(12)-C(13)-C(14)-C(9)  | 0.45(17)   |
| C(10)-C(9)-C(14)-C(13)  | -0.89(16)  |
| C(8)-C(9)-C(14)-C(13)   | 179.77(10) |

---

Symmetry transformations used to generate equivalent atoms:

## Computational Details

### 1.1 General

All calculations were conducted using DFT<sup>1</sup> implemented in the Jaguar 9.1 suite<sup>2</sup> of ab initio quantum chemistry programs with Becke's three-parameter exchange functional B3LYP including Grimme's D3 dispersion correction levels of theory.<sup>3-8</sup> Geometry optimizations were processed using Pople's 6-31G\*\* basis set<sup>9-14</sup> for main group elements. Palladium was represented using the Los Alamos LACVP basis<sup>15</sup> that includes relativistic effective core potentials. The energies of the optimized structures were reevaluated by additional single point calculations on each optimized geometry using the same functional and Pople's 6-311G\*\* basis set.<sup>16-19</sup> The LACV3P basis set, which is a triple- $\zeta$  contraction of the LACVP basis set developed and tested at Schrodinger, Inc., was used for palladium. Analytical vibrational frequencies within the harmonic approximation were calculated using the 6-31G\*\* basis to confirm the proper convergence to well-defined minima or saddle points on the potential energy surface. Solvation energies were calculated using a self-consistent reaction field (SCRF)<sup>20-22</sup> approach based on accurate numerical solutions of the Poisson-Boltzmann equation and were performed with the 6-31G\*\* basis at the optimized gas phase geometry with a dielectric constant of  $\epsilon = 2.379$  for toluene. As is the case for all continuum models, the solvation energies are subject to the empirical parametrization of the atomic radii that are used to generate the solute surface. The standard set of optimized radii in Jaguar was used for H (1.150 Å), C (1.900 Å), N (1.600 Å), O (1.600 Å), P (2.074 Å), and Pd (1.450 Å).<sup>23</sup> The Gibbs free energies in solution phase  $G(\text{sol})$  were computed with the following protocol.

$$G(\text{sol}) = G(\text{gas}) + G^{\text{solv}} \quad (1)$$

$$G(\text{gas}) = H(\text{gas}) - TS(\text{gas}) \quad (2)$$

$$H(\text{gas}) = E(\text{SCF}) + \text{ZPE} \quad (3)$$

$$\Delta E(\text{SCF}) = \Sigma E(\text{SCF}) \text{ for products} - \Sigma E(\text{SCF}) \text{ for reactants} \quad (4)$$

$$\Delta G(\text{sol}) = \Sigma G(\text{sol}) \text{ for products} - \Sigma G(\text{sol}) \text{ for reactants} \quad (5)$$

$G(\text{gas})$  is the free energy in gas phase;  $G^{\text{solv}}$  is the free energy of solvation;  $H(\text{gas})$  is the enthalpy in gas phase;  $T$  is the temperature (313.15K);  $S(\text{gas})$  is the entropy in gas phase;  $E(\text{SCF})$  is "raw" electronic energy computed from the SCF (self-consistent field) procedure;  $\text{ZPE}$  is the zero-point energy. The entropy we refer to is specifically the vibrational/rotational/translational entropy of the solute(s), and the entropy of the solvent is implicitly comprised in the continuum solvation model.

## COMPUTATIONAL INVESTIGATIONS OF THE CROSS-COUPLING LIGAND EFFECTS

To better understand the role of the ligand in determining the product distribution, we conducted density functional theory (DFT) calculations. Figure S13 shows the calculated free energy profile using RuPhos. The calculations start from an alkoxide intermediate (**R1**), formed by sequential activation events involving base-assisted addition of phenyl bromide to RuPhos-Pd-G4. The reaction may then proceed via either proximal or distal C–C bond cleavage (refer to Figure 1D), ultimately leading to products **3a** or **3b**, respectively. Our calculations indicate that the proximal C–C bond cleavage *via* **R1'-TS<sub>prox</sub>** is more favorable, with a free energy barrier of 10.60 kcal/mol, whereas the distal cleavage has an activation free energy of 14.05 kcal/mol. The calculated preference for proximal C–C bond cleavage over distal C–C bond cleavage of the  $\beta$ -lactam using the RuPhos ligated Pd(II)-complex is consistent with our previous computational findings and the experimental observations presented above.

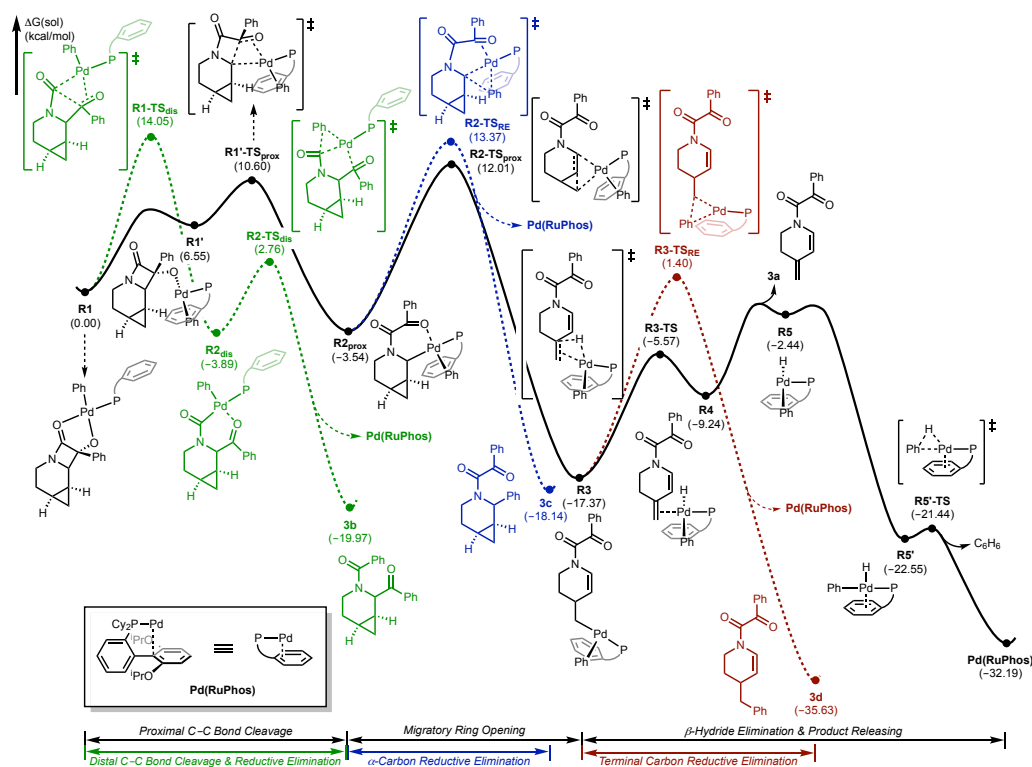

**Figure S13.** Calculated free energy profile for the formation of diene **3a** from lactam **2a** using Pd(RuPhos). Dotted lines represent side pathways. Geometry optimization, vibration, solvation calculations: B3LYP-D3/6-31G\*\* (LACVP for Pd).  $\epsilon=2.379$  for toluene. Single point calculations: B3LYP-D3/6-311G\*\* (LACV3P for Pd).

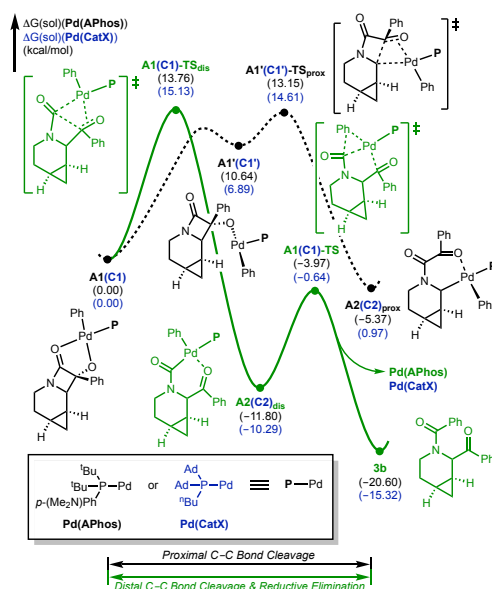

**Figure S14.** Calculated free energy profile for the distal/proximal C–C bond cleavage steps. Black and blue indicate profiles using APhos and CataCXium A, respectively.

In contrast, using monodentate phosphine ligands CataCXium A or APhos, we observed a reversal in the distal/proximal C–C cleavage selectivity leading to an  $\alpha$ -benzoylated species (**3b**) as a major product. Specifically, the product ratio reversed by a factor of 26 (Table 2, entries 1, 2) upon switching from RuPhos to APhos. This experimental observation is in full agreement with our previous findings and corresponds to a 2 kcal/mol calculated difference between the free energy barriers for distal and proximal cleavage in comparing RuPhos to APhos or to CataCXium A ( $\Delta\Delta G^\ddagger = \Delta G(\mathbf{X1-TS}_{\text{dis}}) - \Delta G(\mathbf{X1'-TS}_{\text{prox}})$ , where  $\mathbf{X} = \mathbf{A}$  (for APhos),  $\mathbf{C}$  (for CataCXium A), or  $\mathbf{R}$  (for RuPhos) (see below for a derivation of this selectivity). Figure S14 shows the energy profiles of the C–C bond cleavage steps when APhos and CataCXium A are used as ligands. In agreement with our theoretical prediction, the  $\Delta\Delta G^\ddagger$  values were calculated to be 0.61 and 0.52 kcal/mol, for APhos and CataCXium A, respectively, showing a clear decrease of approximately 3 kcal/mol in selectivity to favor distal cleavage compared to the RuPhos case ( $\Delta\Delta G^\ddagger = 3.45$  kcal/mol).

Here, the  $\Delta\Delta G^\ddagger$  values must be evaluated carefully when using the Curtin-Hammett principle because the calculations do not consider the effect of the frequency factor (pre-exponential factor).<sup>24, 25, 26</sup> In the case of distal C–C cleavage,  $\mathbf{A1(C1)-TS}_{\text{dis}}$  is structurally very similar to complex  $\mathbf{A1(C1)}$ , whereas in the case of proximal C–C cleavage, the related transition state  $\mathbf{A1'(C1')-TS}_{\text{prox}}$  and  $\mathbf{A1(C1)}$ , requires a significant structural change through  $\mathbf{A1'(C1')}$ , including dissociation of a stabilizing Pd–carbonyl interaction, to approach the required geometry. Therefore, it is anticipated that  $\mathbf{A1(C1)-TS}_{\text{dis}}$  would have a larger frequency factor compared to  $\mathbf{A1'(C1')-TS}_{\text{prox}}$ . Overall, the proximal C–C bond cleavage should be less favorable than what is anticipated from the free energy calculations. On this basis, even though  $\mathbf{A1(C1)-TS}_{\text{dis}}$  is very slightly higher in energy compared to  $\mathbf{A1'(C1')-TS}_{\text{prox}}$ , we propose that the distal C–C bond cleavage should be favored in the APhos and CataCXium A ligated

systems, and our interpretation matches our experimental observations (Table 2). Additionally, the above presented distal/proximal selectivity data for the RuPhos, APhos, and CataCXium A ligated systems are consistent with a distortion-interaction analysis,<sup>22, 23</sup> details of which can be found below.

Following lactam C–C bond cleavage, there are two possible mechanistic scenarios. In the case of APhos and CataCXium A, the distal C–C bond cleaved intermediate **A2(C2)<sub>dis</sub>** (Figure S14) undergoes a RE with an energy demand of 7.83(9.65) kcal/mol to give  $\alpha$ -benzoylated product **3b** with the regeneration of the Pd catalyst. With RuPhos, the proximal C–C bond cleaved intermediate **R2<sub>prox</sub>** (Figure S13) could undergo RE (**R2-TS<sub>RE</sub>**) to form an  $\alpha$ -arylated product (**3c**), or proceed through  $\beta$ -carbon elimination (**R2-TS<sub>prox</sub>**) to ring-opened terminal alkyl intermediate **R3**. Our calculations show that **R2-TS<sub>prox</sub>** is favored over **R2-TS<sub>RE</sub>** by 1.36 kcal/mol. The barrier associated with RE from **R3** was calculated to be 7.07 kcal/mol higher as compared to  $\beta$ -hydride elimination, via **R3-TS**, consistent with why **3d** was not observed experimentally. Ultimately, a  $\beta$ -hydride elimination (**R3-TS**) generates the observed diene product (**3a**) and benzene as a byproduct (via **R5'-TS**), with regeneration of Pd(**RuPhos**).

## 1.2 Correlation Between Selectivity and $\Delta\Delta G^\ddagger$

In this section, we derive the change of  $\Delta\Delta G^\ddagger$  of 2 kcal/mol from the experimentally observed selectivity change. The elementary reactions of interest have a common reactant (**R1**). The reaction is represented as shown below.

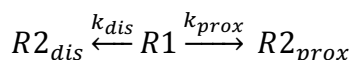

The product ratio can be written as

$$\frac{[R2_{dis}]}{[R2_{prox}]} = \frac{A_{R,dis}}{A_{R,prox}} \frac{\exp\left(-\frac{\Delta G_{dis}^\ddagger}{RT}\right)}{\exp\left(-\frac{\Delta G_{prox}^\ddagger}{RT}\right)} = \frac{A_{dis}}{A_{prox}} \exp\left(-\frac{\Delta G_{dis}^\ddagger - \Delta G_{prox}^\ddagger}{RT}\right) \dots (1)$$

Where

$\Delta G_{dis}^\ddagger = \Delta G(\mathbf{R1-TS}_{dis}) - \Delta G(\mathbf{R1})$  and  $\Delta G_{prox}^\ddagger = \Delta G(\mathbf{R1}'-TS_{prox}) - \Delta G(\mathbf{R1})$ , and A are the frequency factors.

$$\text{Let } \Delta\Delta G_{\ddagger R} = \Delta G(\mathbf{R1-TS}_{dis}) - \Delta G(\mathbf{R1}'-TS_{prox})$$

Thus,

$$\frac{[R2_{dis}]}{[R2_{prox}]} = \frac{A_{R,dis}}{A_{R,prox}} \exp(-\Delta\Delta G_R/RT) \dots (2)$$

With RuPhos-Pd-G4,  $[R2_{dis}]/[R2_{prox}] \approx 0.2$ .



With APhos,  $[A2_{dis}]/[A2_{prox}] \approx 5.2$ .

Substitute  $[R2_{dis}]/[R2_{prox}]$  with  $[A2_{dis}]/[A2_{prox}]$  in equation (2) will give,

$$\frac{[A2_{dis}]}{[A2_{prox}]} = \frac{A_{A,dis}}{A_{A,prox}} \exp(-\Delta\Delta G \ddagger_A/RT) \dots (3)$$

Be dividing equation (2) by (3), we get,

$$\frac{[R2_{dis}]}{[R2_{prox}]} \frac{[A2_{prox}]}{[A2_{dis}]} = \frac{0.2}{5.2} = \frac{1}{26} = \frac{A_{R,dis}}{A_{R,prox}} \frac{A_{A,prox}}{A_{A,dis}} \exp(-(\Delta\Delta G \ddagger_R - \Delta\Delta G \ddagger_A)/RT)$$

Assuming  $\{(A_{R,dis})(A_{A,prox})\}/\{(A_{R,prox})(A_{A,dis})\} = 1$ , then  $\exp(-(\Delta\Delta G \ddagger_R - \Delta\Delta G \ddagger_A)/RT) = 1/26$ .

Therefore, the change of  $\Delta\Delta G \ddagger$  ( $\Delta\Delta G \ddagger_A - \Delta\Delta G \ddagger_R$ ) will be  $-RT \ln(1/26) = 8479$  J/mol = 2.03 kcal/mol.

### 1.3 Distortion-Interaction Analysis

We analyzed two transition states to gain a deeper understanding of the dependency of distal/proximal selectivity on the ligand. A distortion-interaction analysis<sup>27, 28</sup> was conducted and the results are shown in Figure S15. For both RuPhos and CataCXium A, the distortions of ligands ([L]) are negligible, and the distortions of the remaining part ([M]) are greater in  $1'$ - $TS_{prox}$  than  $1$ - $TS_{dis}$ . This difference arises from a loss of Pd–carbonyl interaction. Notably, a significant difference in interaction energy changes between [L] and [M] ( $\Delta E(\text{interact})$ ) of  $R1'$ - $TS_{prox}$ . During the bond cleaving process, the Pd–carbonyl bond and the Pd–alkyl bond are newly forming on the *trans*-site of the phosphine atom. On the basis of the *trans*-influence, the interaction between palladium and phosphine is assessed a penalty ( $\Delta E(\text{interact}) > 0$ ). This is reflected in the distortion-interaction analysis as  $\Delta E(\text{interact})$ s; calculated to be 6.4 ~ 8.7 kcal/mol in all transition states except  $R1'$ - $TS_{prox}$ , where it is approximately zero. This distinction is understandable considering its TS structure. At **1** and  $1$ - $TS_{dis}$ , the palladium exists in a 16 e<sup>-</sup> square-planar structure, where RuPhos should be a monodentate ligand (Figure 2, S15 c). However, In  $R1'$ , which lacks the Pd–carbonyl interaction, there is a vacant site where RuPhos could serve as a bidentate ligand. The additional interaction between the palladium and an *ipso*-carbon of the biaryl ring (C(*ipso*)) in Figure S15 c, d) enhances the interaction energy between [M] and [L]. With this functional feature of the biaryl phosphine ligand, there is no  $\Delta E(\text{interact})$  penalty on  $R1'$ - $TS_{prox}$ . Other monodentate ligands cannot compensate for the lack of a coordinate site and thus make  $1'$ - $TS_{prox}$  unfavorable over  $1$ - $TS_{dis}$ . APhos also showed a similar trend as CataCXium. The optimized structures for  $C1$ - $TS_{dis}$ ,  $C1'$ - $TS_{prox}$ , and the same analysis for the APhos case are shown below.

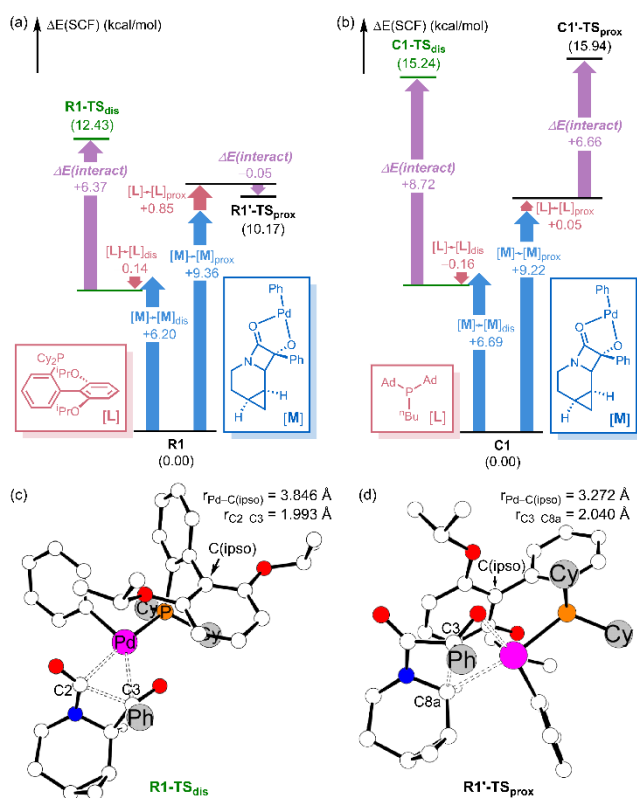

**Figure S15.** Distortion-interaction analysis of (a) **R1-TS<sub>dis</sub>**, **R1'-TS<sub>prox</sub>**, (b) **C1-TS<sub>dis</sub>** and **C1'-TS<sub>prox</sub>**. All species are fragmented into phosphine ligand and the remaining parts. (c) Optimized structure of **R1-TS<sub>dis</sub>** and (d) **R1'-TS<sub>prox</sub>**. Unimportant hydrogen atoms are omitted for clarity.

All molecules used for the distortion-interaction analysis were fragmented into a ligand part (**[L]**) and the remaining Pd(Ph)(substrate) part (**[M]**) as shown in Figure S16 a. Electronic energy ( $E(\text{SCF})$ ) of each geometry was reevaluated using the same method for single-point calculations (B3LYP-D3/6-311G\*\*, LACV3P for Pd) without further geometry optimization. All energies used for the analysis were computed with the following protocol.

$$[\mathbf{L}][\mathbf{L}]_{\text{dis}} = E(\text{SCF}, [\mathbf{L}]_{\text{dis}}) - E(\text{SCF}, [\mathbf{L}]) \quad (9)$$

$$[\mathbf{M}][\mathbf{M}]_{\text{dis}} = E(\text{SCF}, [\mathbf{M}]_{\text{dis}}) - E(\text{SCF}, [\mathbf{M}]) \quad (10)$$

$$[\mathbf{L}][\mathbf{L}]_{\text{prox}} = E(\text{SCF}, [\mathbf{L}]_{\text{prox}}) - E(\text{SCF}, [\mathbf{L}]) \quad (11)$$

$$[\mathbf{M}][\mathbf{M}]_{\text{prox}} = E(\text{SCF}, [\mathbf{M}]_{\text{prox}}) - E(\text{SCF}, [\mathbf{M}]) \quad (12)$$

$$\mathbf{E}(\text{interact}) = E(\text{SCF}, \mathbf{1}) - (E(\text{SCF}, [\mathbf{L}]) + E(\text{SCF}, [\mathbf{M}])) \quad (13)$$

$$\mathbf{E}(\text{interact})_{\text{dis}} = E(\text{SCF}, \mathbf{1-TS}_{\text{dis}}) - (E(\text{SCF}, [\mathbf{L}]_{\text{dis}}) + E(\text{SCF}, [\mathbf{M}]_{\text{dis}})) \quad (14)$$

$$\mathbf{E}(\text{interact})_{\text{prox}} = E(\text{SCF}, \mathbf{1'-TS}_{\text{prox}}) - (E(\text{SCF}, [\mathbf{L}]_{\text{prox}}) + E(\text{SCF}, [\mathbf{M}]_{\text{prox}})) \quad (15)$$

$$\Delta\mathbf{E}(\text{interact}) = \mathbf{E}(\text{interact})_{\text{dis}} - \mathbf{E}(\text{interact}) \text{ or } \mathbf{E}(\text{interact})_{\text{prox}} - \mathbf{E}(\text{interact}) \quad (16)$$

A schematic diagram for the relationship is depicted in Figure S16 b, and all numeric data for the analysis is tabulated in Table S6. Lastly, the distortion-interaction analysis for the APPhos system is depicted in Figure S17.

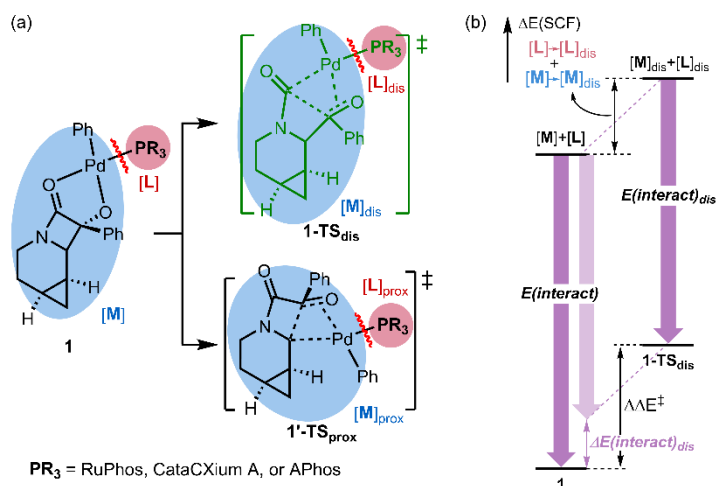

**Figure S16.** (a) Fragmentation for the resting state (1) and two transition states (1-TS<sub>dis</sub> and 1'-TS<sub>prox</sub>). (b) Schematic diagram for energies used in distortion-interaction analysis. 1-TS<sub>dis</sub> was used for the example.

**Table S6a. E(SCF) table for distortion-interaction analysis (sample, kcal/mol).**

|          |             | 1-TS <sub>dis</sub>    |                        |                            | 1'-TS <sub>prox</sub>   |                         |                             |
|----------|-------------|------------------------|------------------------|----------------------------|-------------------------|-------------------------|-----------------------------|
|          |             | [L] <sub>dis</sub>     | [M] <sub>dis</sub>     | E(interact) <sub>dis</sub> | [L] <sub>prox</sub>     | [M] <sub>prox</sub>     | E(interact) <sub>prox</sub> |
| <b>1</b> | [L]         | [L]□[L] <sub>dis</sub> | -                      | -                          | [L]□[L] <sub>prox</sub> | -                       | -                           |
|          | [M]         | -                      | [M]□[M] <sub>dis</sub> | -                          | -                       | [M]□[M] <sub>prox</sub> | -                           |
|          | E(interact) | -                      | -                      | ΔE(interact)               | -                       | -                       | ΔE(interact)                |

**Table S6b. E(SCF) table for distortion-interaction analysis using RuPhos (kcal/mol).**

|           |             | R1-TS <sub>dis</sub> |            |        | R1'-TS <sub>prox</sub> |            |        |
|-----------|-------------|----------------------|------------|--------|------------------------|------------|--------|
|           |             | -1042516.38          | -693832.82 | -78.68 | -1042515.39            | -693829.66 | -85.09 |
| <b>R1</b> | -1042516.25 | -0.14                | -          | -      | +0.85                  | -          | -      |
|           | -693839.02  | -                    | +6.20      | -      | -                      | +9.36      | -      |
|           | -85.05      | -                    | -          | +6.37  | -                      | -          | -0.05  |

**Table S6c. E(SCF) table for distortion-interaction analysis using CataCXium A (kcal/mol).**

|           |            | C1-TS <sub>dis</sub> |            |        | C1'-TS <sub>prox</sub> |            |        |
|-----------|------------|----------------------|------------|--------|------------------------|------------|--------|
|           |            | -803068.14           | -693833.33 | -70.20 | -803067.94             | -693830.79 | -72.25 |
| <b>C1</b> | -803067.98 | -0.16                | -          | -      | +0.04                  | -          | -      |
|           | -693840.02 | -                    | +6.69      | -      | -                      | +9.22      | -      |
|           | -78.91     | -                    | -          | +8.72  | -                      | -          | +6.66  |

**Table S6d. E(SCF) table for distortion-interaction analysis using APhos (kcal/mol).**

|           |            | A1-TS <sub>dis</sub> |            |        | A1'-TS <sub>prox</sub> |            |        |
|-----------|------------|----------------------|------------|--------|------------------------|------------|--------|
|           |            | -641885.70           | -693831.78 | -63.51 | -641885.95             | -693830.19 | -65.56 |
| <b>A1</b> | -641885.98 | +0.28                | -          | -      | +0.02                  | -          | -      |
|           | -693842.83 | -                    | +11.05     | -      | -                      | +12.64     | -      |
|           | -69.07     | -                    | -          | +5.56  | -                      | -          | +3.51  |

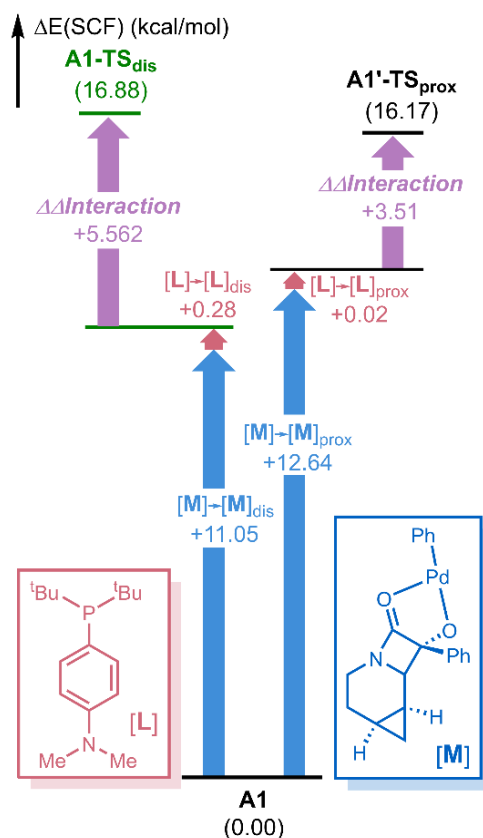

**Figure S17.** Distortion-interaction analysis of  $A1-TS_{dis}$ ,  $A1'-TS_{prox}$ . Some hydrogen atoms are omitted for clarity.

#### 1.4 Optimized Structure's Energy Components

**Table S7. Computed Energy Components for Optimized Structures**

|                   | $E(SCF)/(eV)$         | $ZPE/(kcal/mol)$     | $S(gas)/(cal/mol)$   | $G^{solv}/(kcal/mol)$ |
|-------------------|-----------------------|----------------------|----------------------|-----------------------|
|                   | B3LYP-D3<br>/LACV3P** | B3LYP-D3<br>/LACVP** | B3LYP-D3<br>/LACVP** | B3LYP-D3<br>/LACVP**  |
| <b>Pd(Ruphos)</b> | -48658.210            | 423.411              | 218.34               | -3.53                 |
| <b>Pd(APhos)</b>  | -31284.875            | 258.959              | 156.73               | -3.59                 |
| <b>Pd(CatX)</b>   | -38274.483            | 373.530              | 162.55               | -2.18                 |
| <b>C6H6</b>       | -6321.578             | 63.159               | 64.09                | -1.27                 |
| <b>3a</b>         | -20319.129            | 151.39               | 122.64               | -4.59                 |
| <b>R1</b>         | -75299.197            | 641.928              | 306.57               | -5.56                 |
| <b>R1-TSdis</b>   | -75298.658            | 641.086              | 299.31               | -5.37                 |

|                   |            |         |        |       |
|-------------------|------------|---------|--------|-------|
| <b>R2dis</b>      | -75299.353 | 641.953 | 305.31 | -6.27 |
| <b>R2-TSdis</b>   | -75299.121 | 641.572 | 300.58 | -6.07 |
| <b>3b</b>         | -26640.900 | 217.73  | 144.22 | -5.68 |
| <b>R1'</b>        | -75298.975 | 641.53  | 299.71 | -5.87 |
| <b>R1'-TSprox</b> | -75298.756 | 641.18  | 302.23 | -5.74 |
| <b>R2prox</b>     | -75299.381 | 641.647 | 303.04 | -5.68 |
| <b>R2-TSRE</b>    | -75298.569 | 640.399 | 301.99 | -6.58 |
| <b>3c</b>         | -26640.834 | 217.578 | 143.66 | -5.40 |
| <b>R2-TSprox</b>  | -75298.639 | 641.435 | 304.99 | -6.42 |
| <b>R3</b>         | -75299.706 | 640.464 | 318.37 | -6.03 |
| <b>R3-TSRE</b>    | -75298.950 | 639.454 | 307.77 | -7.01 |
| <b>3d</b>         | -26641.485 | 217.383 | 150.70 | -5.48 |
| <b>R3-TS</b>      | -75299.085 | 637.362 | 315.35 | -6.40 |
| <b>R4</b>         | -75299.344 | 638.241 | 309.86 | -6.69 |
| <b>R5</b>         | -54978.927 | 485.168 | 244.62 | -5.35 |
| <b>R5'</b>        | -54979.754 | 484.402 | 247.92 | -4.59 |
| <b>R5'-TS</b>     | -54979.707 | 483.585 | 248.30 | -3.62 |
| <b>A1</b>         | -57925.692 | 476.483 | 250.05 | -6.31 |
| <b>A1-TSdis</b>   | -57924.960 | 475.751 | 255.85 | -6.88 |
| <b>A2dis</b>      | -57926.186 | 476.285 | 247.83 | -7.21 |
| <b>A2-TSdis</b>   | -57925.743 | 475.833 | 254.78 | -6.97 |
| <b>A1'</b>        | -57925.143 | 475.850 | 252.31 | -6.99 |
| <b>A1'-TSprox</b> | -57924.991 | 475.514 | 254.03 | -7.11 |
| <b>A2prox</b>     | -57925.906 | 476.457 | 253.01 | -5.79 |
| <b>C1</b>         | -64915.512 | 591.253 | 256.67 | -5.25 |
| <b>C1-TSdis</b>   | -64914.851 | 590.454 | 255.02 | -5.08 |

|                                                         |            |         |        |       |
|---------------------------------------------------------|------------|---------|--------|-------|
| <b>C2dis</b>                                            | -64915.994 | 590.969 | 252.98 | -5.30 |
| <b>C2-TSdis</b>                                         | -64915.559 | 590.578 | 252.14 | -5.55 |
| <b>C1'</b>                                              | -64915.116 | 590.554 | 259.25 | -5.98 |
| <b>C1'-TSprox</b>                                       | -64914.821 | 590.268 | 255.67 | -5.90 |
| <b>C2prox</b>                                           | -64915.496 | 590.888 | 256.43 | -4.36 |
| <b>[M] of R1</b>                                        | -30087.715 |         |        |       |
| <b>[L] of R1</b>                                        | -45207.794 |         |        |       |
| <b>[M]<sub>dis</sub> of R1-TS<sub>dis</sub></b>         | -30087.446 |         |        |       |
| <b>[L]<sub>dis</sub> of R1-TS<sub>dis</sub></b>         | -45207.800 |         |        |       |
| <b>[M]<sub>prox</sub> of R1'-<br/>TS<sub>prox</sub></b> | -30087.309 |         |        |       |
| <b>[L]<sub>prox</sub> of R1'-<br/>TS<sub>prox</sub></b> | -45207.757 |         |        |       |
| <b>[M] of C1</b>                                        | -30087.880 |         |        |       |
| <b>[L] of C1</b>                                        | -27834.817 |         |        |       |
| <b>[M]<sub>dis</sub> of C1-TS<sub>dis</sub></b>         | -30087.401 |         |        |       |
| <b>[L]<sub>dis</sub> of C1-TS<sub>dis</sub></b>         | -27834.805 |         |        |       |
| <b>[M]<sub>prox</sub> of C1'-<br/>TS<sub>prox</sub></b> | -30087.332 |         |        |       |
| <b>[L]<sub>prox</sub> of C1'-<br/>TS<sub>prox</sub></b> | -27834.816 |         |        |       |
| <b>[M] of A1</b>                                        | -30087.758 |         |        |       |
| <b>[L] of A1</b>                                        | -34824.332 |         |        |       |
| <b>[M]<sub>dis</sub> of A1-TS<sub>dis</sub></b>         | -30087.468 |         |        |       |
| <b>[L]<sub>dis</sub> of A1-TS<sub>dis</sub></b>         | -34824.339 |         |        |       |
| <b>[M]<sub>prox</sub> of A1'-<br/>TS<sub>prox</sub></b> | -30087.358 |         |        |       |
| <b>[L]<sub>prox</sub> of A1'-<br/>TS<sub>prox</sub></b> | -34824.330 |         |        |       |

---

## 1.5 Cartesian coordinates of the optimized geometries

**Table S8. Cartesian coordinates of the optimized geometries**

The cartesian coordinates of optimized geometries are given below in the standard XYZ format, and units are in Å

| Pd(Ruphos) |              |              |              |
|------------|--------------|--------------|--------------|
| H          | -2.457625235 | -0.388491541 | -6.346761356 |
| O          | -5.331909116 | 0.269983934  | 0.879182867  |
| C          | -6.079825261 | -0.071822762 | 2.059525145  |
| H          | -5.813644342 | -1.089594604 | 2.378573673  |
| C          | -5.617326392 | 0.915435188  | 3.123236242  |
| H          | -5.808413799 | 1.940275076  | 2.789736650  |
| H          | -6.152367018 | 0.744463743  | 4.062569353  |
| H          | -4.545526623 | 0.807867551  | 3.306836300  |
| C          | -7.580984260 | 0.022126138  | 1.785293183  |
| H          | -7.834649016 | 1.042475480  | 1.479705121  |
| H          | -7.882896621 | -0.660817085 | 0.986903396  |
| H          | -8.151883426 | -0.225385780 | 2.686357110  |
| C          | -1.866200591 | 0.745468267  | 0.945744242  |
| C          | -1.229969169 | -0.478448158 | 1.633296993  |
| C          | -1.337358253 | 2.060520881  | 1.550181045  |
| H          | -2.947709330 | 0.697727870  | 1.131378625  |
| C          | -1.458584788 | -0.433420533 | 3.153264729  |
| H          | -0.150801971 | -0.505928560 | 1.432878736  |
| H          | -1.647553270 | -1.395865750 | 1.202942050  |
| C          | -1.558124216 | 2.099989071  | 3.072870946  |
| H          | -0.261417153 | 2.154492707  | 1.349944439  |
| H          | -1.827404908 | 2.920434194  | 1.080036614  |
| C          | -0.935390567 | 0.876717180  | 3.762810830  |
| H          | -0.977814030 | -1.295900455 | 3.631624468  |
| H          | -2.535736208 | -0.524107466 | 3.356422278  |
| H          | -1.141031281 | 3.026398524  | 3.487840905  |
| H          | -2.637462563 | 2.124602984  | 3.276938938  |
| H          | -1.133106394 | 0.904779693  | 4.841639224  |
| H          | 0.157355054  | 0.915159177  | 3.642449503  |
| C          | -0.220466548 | 1.545613560  | -1.447303546 |
| C          | 1.026103091  | 0.768591001  | -0.975699530 |
| C          | -0.181600203 | 1.723251986  | -2.979068725 |
| H          | -0.195804949 | 2.535947480  | -0.973462687 |
| C          | 2.323755254  | 1.454274742  | -1.437143290 |
| H          | 0.976046946  | -0.252199063 | -1.379406478 |
| H          | 1.031489645  | 0.673487782  | 0.115003468  |
| C          | 1.110808355  | 2.416438820  | -3.437990148 |
| H          | -0.243400371 | 0.725824181  | -3.435966275 |
| H          | -1.057389467 | 2.282410922  | -3.325353343 |
| C          | 2.352022716  | 1.648165525  | -2.960372047 |
| H          | 3.190142678  | 0.866498808  | -1.109233884 |
| H          | 2.407650319  | 2.435625578  | -0.947143661 |
| H          | 1.114941673  | 2.511219673  | -4.531027546 |
| H          | 1.138747324  | 3.439401957  | -3.034320688 |
| H          | 3.268249319  | 2.169644303  | -3.263915581 |
| H          | 2.372658663  | 0.662480242  | -3.447369029 |
| C          | -3.871826194 | 4.194523079  | -1.675188912 |
| C          | -5.195364394 | 3.773049041  | -1.785515019 |
| C          | -5.486383132 | 2.415015469  | -1.678852881 |
| C          | -4.892615787 | 0.029312869  | -1.403856097 |
| C          | -4.839797049 | -0.754765299 | -2.574512614 |
| C          | -5.207262098 | -2.109239767 | -2.544018239 |
| C          | -5.636469285 | -2.664936851 | -1.338413846 |
| C          | -5.717944222 | -1.907174632 | -0.174068323 |
| C          | -5.343157032 | -0.555727246 | -0.213370226 |
| P          | -1.795263368 | 0.649416550  | -0.943221083 |
| H          | -1.842702114 | 3.617741117  | -1.360522919 |
| H          | -3.619833398 | 5.248435725  | -1.759965756 |
| H          | -5.992146813 | 4.491090872  | -1.958773332 |
| H          | -6.511467035 | 2.069012105  | -1.773841511 |
| O          | -4.443085317 | -0.087076800 | -3.691614539 |
| H          | -5.179730823 | -2.715526243 | -3.440213060 |
| H          | -5.928502794 | -3.711272537 | -1.311750629 |
| H          | -6.061582260 | -2.365135458 | 0.745083550  |
| Pd         | -1.996803158 | -1.413889297 | -1.798989164 |
| C          | -3.959209826 | -0.804457129 | -4.841743313 |
| H          | -3.496462948 | -1.742075598 | -4.502980929 |
| C          | -5.111820731 | -1.089654186 | -5.803410463 |
| H          | -4.753453092 | -1.637529888 | -6.681404837 |
| H          | -5.897822883 | -1.679548877 | -5.324436055 |
| H          | -5.554031059 | -0.146344564 | -6.139634125 |
| C          | -2.882696560 | 0.082312528  | -5.454102383 |
| H          | -3.307816362 | 1.050453031  | -5.737679680 |
| H          | -2.087499271 | 0.250345049  | -4.724786781 |
| C          | -4.481467267 | 1.464420023  | -1.461199549 |
| C          | -3.136635204 | 1.885234055  | -1.332957413 |
| C          | -2.862433641 | 3.258930880  | -1.448442821 |
| Pd(APhos)  |              |              |              |
| C          | -2.303285000 | -0.668579900 | -1.808751700 |
| C          | -1.337923400 | -0.440659300 | -2.816848800 |
| C          | -0.028830621 | -0.110864915 | -2.390089500 |
| C          | 0.274043900  | 0.014393071  | -1.040067200 |
| C          | -0.686097900 | -0.193312230 | -0.033885438 |
| C          | -1.975734200 | -0.545895000 | -0.463696420 |
| N          | -1.659003000 | -0.527723100 | -4.159283000 |
| C          | -0.600290660 | -0.451785620 | -5.160090400 |
| C          | -2.967891700 | -1.037600000 | -4.553183600 |
| P          | -0.384324200 | -0.022715164 | 1.776421200  |
| C          | 1.230494400  | -1.014291800 | 2.124459500  |
| C          | -0.098924720 | 1.865572300  | 1.988913900  |
| C          | 0.858198460  | 2.515975700  | 0.972172100  |
| C          | -1.491118100 | 2.508988600  | 1.804744500  |
| C          | 0.388400140  | 2.140075000  | 3.422614800  |
| C          | 1.323101800  | -1.259264100 | 3.647097600  |
| C          | 1.043134800  | -2.379269000 | 1.430270600  |
| C          | 2.551893500  | -0.379282060 | 1.655117300  |
| H          | -3.317133000 | -0.946115260 | -2.069974400 |
| H          | 0.760797600  | 0.054482635  | -3.112931000 |
| H          | 1.290429600  | 0.283854900  | -0.779026450 |
| H          | -2.739581600 | -0.733548340 | 0.287431450  |
| H          | 0.153430070  | -1.260628200 | -5.055885300 |
| H          | -1.049324800 | -0.527543300 | -6.154126600 |
| H          | -0.066553770 | 0.515743260  | -5.107577300 |
| H          | -3.781607200 | -0.398253020 | -4.163443000 |
| H          | -3.035182700 | -1.030548000 | -5.644458000 |
| H          | -3.152102200 | -2.073219800 | -4.199357000 |
| H          | 0.929939500  | 3.589718000  | 1.188934000  |
| H          | 1.869720200  | 2.108795400  | 1.013853000  |
| H          | 0.487211530  | 2.412998000  | -0.050277174 |
| H          | -1.403795800 | 3.598992000  | 1.900298000  |
| H          | -2.198487300 | 2.148223000  | 2.557459800  |
| H          | -1.906112900 | 2.288564200  | 0.815868500  |
| H          | -0.245251500 | 1.633591800  | 4.158087000  |
| H          | 1.422295000  | 1.817772200  | 3.576299200  |
| H          | 0.348737120  | 3.218091700  | 3.622744000  |

|    |              |              |             |
|----|--------------|--------------|-------------|
| H  | 2.191002400  | -1.897676000 | 3.857642400 |
| H  | 1.446818400  | -0.332491600 | 4.212329400 |
| H  | 0.424096300  | -1.760095100 | 4.018957600 |
| H  | 1.859706300  | -3.050693500 | 1.723498600 |
| H  | 1.049089300  | -2.290776500 | 0.340908380 |
| H  | 0.097169740  | -2.843848700 | 1.728566200 |
| H  | 2.572495000  | -0.184988170 | 0.580632200 |
| H  | 2.769892200  | 0.554143800  | 2.179803800 |
| H  | 3.375950000  | -1.071635000 | 1.871191300 |
| Pd | -2.073656300 | -0.773394000 | 3.071383000 |

### Pd(CatX)

|   |              |              |              |
|---|--------------|--------------|--------------|
| C | 5.441222199  | -1.352790825 | 1.172120726  |
| C | 4.311053186  | -1.301566996 | 0.138810209  |
| C | 3.114961061  | -0.466544946 | 0.615922056  |
| C | 1.984661502  | -0.422277883 | -0.422102324 |
| P | 0.657920212  | 0.866794148  | -0.127322733 |
| C | -0.471994317 | 0.633694588  | -1.661182244 |
| C | -1.503984124 | 1.795967793  | -1.723294559 |
| C | -2.357005322 | 1.704511367  | -3.006519069 |
| C | -3.097337698 | 0.351396297  | -3.040063883 |
| C | -2.068092141 | -0.797310977 | -3.029186425 |
| C | -1.148662732 | -0.674521718 | -4.259755442 |
| C | -0.414204799 | 0.680591322  | -4.215589754 |
| C | -1.442634204 | 1.825661155  | -4.239273828 |
| C | 0.429709240  | 0.754255297  | -2.925116457 |
| C | -1.224694007 | -0.718572014 | -1.734973217 |
| C | -0.231941997 | 0.253771055  | 1.460580654  |
| C | -1.668552168 | 0.831708157  | 1.553988383  |
| C | -2.336180419 | 0.433841511  | 2.888650961  |
| C | -1.516689605 | 0.986952170  | 4.069357978  |
| C | -0.090843352 | 0.407914998  | 4.008258744  |
| C | -0.153543132 | -1.129174649 | 4.110479338  |
| C | -0.978680919 | -1.684908330 | 2.932653916  |
| C | -2.406008314 | -1.103993715 | 2.982863028  |
| C | -0.302255840 | -1.291111168 | 1.598558987  |
| C | 0.568747425  | 0.816719110  | 2.673995748  |
| H | 6.288676360  | -1.947352029 | 0.814537372  |
| H | 5.811020159  | -0.346055271 | 1.399260275  |
| H | 5.095452018  | -1.796468165 | 2.113334092  |
| H | 3.974376866  | -2.321571291 | -0.093584766 |
| H | 4.690497073  | -0.882344489 | -0.803222811 |
| H | 3.442450683  | 0.559258794  | 0.831343030  |
| H | 2.753040387  | -0.881180654 | 1.564362936  |
| H | 1.539792998  | -1.416461811 | -0.551486427 |
| H | 2.425729488  | -0.143765740 | -1.382892646 |
| H | -2.165042851 | 1.776757250  | -0.853499626 |
| H | -0.966404091 | 2.751676108  | -1.689827171 |
| H | -3.086913775 | 2.524196750  | -3.004150748 |
| H | -3.725072175 | 0.285260317  | -3.938623242 |
| H | -3.766430802 | 0.265943254  | -2.173080121 |
| H | -2.590294290 | -1.762703576 | -3.051864366 |
| H | -0.421750343 | -1.497967049 | -4.270535900 |
| H | -1.740087192 | -0.755764142 | -5.181327171 |
| H | 0.257622533  | 0.765563428  | -5.079495363 |
| H | -0.927534945 | 2.795127024  | -4.231063624 |
| H | -2.036643810 | 1.782189091  | -5.162125989 |
| H | 0.990366366  | 1.697202501  | -2.883752414 |
| H | 1.161973099  | -0.059412876 | -2.952749902 |
| H | -0.513147613 | -1.553689864 | -1.708246359 |
| H | -1.890680493 | -0.836155179 | -0.874356899 |
| H | -1.630562860 | 1.924715890  | 1.462172907  |
| H | -2.287803452 | 0.457258336  | 0.733217469  |
| H | -3.350852669 | 0.852022889  | 2.912869336  |
| H | -1.479776838 | 2.083202308  | 4.021642727  |
| H | -1.996680674 | 0.720665036  | 5.020663312  |
| H | 0.508098071  | 0.810179408  | 4.835416879  |

|    |              |              |             |
|----|--------------|--------------|-------------|
| H  | -0.608384567 | -1.427382732 | 5.064625375 |
| H  | 0.860620002  | -1.550303014 | 4.091575254 |
| H  | -1.022795383 | -2.779997410 | 2.995462586 |
| H  | -3.005742817 | -1.506347178 | 2.155048910 |
| H  | -2.903101232 | -1.403193982 | 3.915102870 |
| H  | 0.703681840  | -1.723483640 | 1.574130124 |
| H  | -0.858356294 | -1.731281921 | 0.765227666 |
| H  | 1.602766960  | 0.460326362  | 2.651653119 |
| H  | 0.616043949  | 1.909507744  | 2.594951847 |
| Pd | 1.480723474  | 2.942406939  | 0.013791381 |

### C<sub>6</sub>H<sub>6</sub>

|   |              |              |              |
|---|--------------|--------------|--------------|
| C | -2.207606262 | 0.000000000  | -2.620451903 |
| C | -3.363674954 | -0.354690359 | -1.922287903 |
| C | -1.051537569 | 0.354690359  | -1.922287903 |
| H | -4.263100061 | -0.630640582 | -2.465460903 |
| H | -0.152112462 | 0.630640582  | -2.465460903 |
| C | -3.363674954 | -0.354690359 | -0.525957903 |
| C | -1.051537569 | 0.354690359  | -0.525957903 |
| H | -4.263100061 | -0.630640582 | 0.017215097  |
| H | -0.152112462 | 0.630640582  | 0.017215097  |
| C | -2.207606262 | 0.000000000  | 0.172206097  |
| H | -2.207606262 | 0.000000000  | 1.258553097  |
| H | -2.207606262 | 0.000000000  | -3.706798903 |

### 3a

|   |             |              |              |
|---|-------------|--------------|--------------|
| C | 2.333202035 | 0.471739219  | 0.920976225  |
| C | 2.577879454 | 1.880741583  | 0.372408914  |
| H | 1.473241572 | 0.012801012  | 0.417695931  |
| H | 3.196988045 | -0.178550118 | 0.787451794  |
| N | 2.036588824 | 0.530666134  | 2.364250978  |
| C | 1.148205233 | 1.534798678  | 2.782627109  |
| C | 0.806803809 | 2.569136875  | 1.987533027  |
| H | 0.723173693 | 1.405653397  | 3.767395005  |
| C | 1.405168975 | 2.790543258  | 0.676520318  |
| H | 0.066546367 | 3.273705155  | 2.353336183  |
| C | 0.978407375 | 3.742577688  | -0.170060621 |
| H | 3.479661211 | 2.287586410  | 0.849195654  |
| H | 2.772624865 | 1.828824628  | -0.702812636 |
| C | 2.560752676 | -0.444830074 | 3.176106827  |
| C | 2.192363587 | -0.438308713 | 4.669448418  |
| O | 3.290938341 | -1.342496203 | 2.764847035  |
| O | 1.016356719 | -0.527908485 | 4.997597234  |
| C | 3.300901213 | -0.394455779 | 5.657894230  |
| C | 2.952670169 | -0.395608906 | 7.019419805  |
| C | 4.652044720 | -0.297922611 | 5.287696103  |
| C | 3.937858081 | -0.300067546 | 7.995241179  |
| H | 1.902772934 | -0.467732984 | 7.283413193  |
| C | 5.635609826 | -0.200053398 | 6.270164358  |
| H | 4.930110304 | -0.322961326 | 4.240846229  |
| C | 5.281859983 | -0.199834110 | 7.621013726  |
| H | 3.663645181 | -0.300301389 | 9.046121615  |
| H | 6.680005112 | -0.127824065 | 5.981834074  |
| H | 6.052315316 | -0.121940685 | 8.383085625  |
| H | 0.155567012 | 4.402767529  | 0.089271905  |
| H | 1.438282091 | 3.885031979  | -1.143155545 |

### R1

|   |              |              |              |
|---|--------------|--------------|--------------|
| H | -3.607822400 | 0.534107100  | -7.085813500 |
| O | -5.848005000 | 0.238084700  | 0.596510600  |
| C | -6.661314000 | -0.289434580 | 1.658653000  |
| H | -6.363673700 | -1.326349700 | 1.865886700  |
| C | -6.330224000 | 0.570474450  | 2.872225300  |
| H | -6.548762300 | 1.620901000  | 2.655571700  |
| H | -6.924655400 | 0.257807970  | 3.736543400  |



|    |              |              |              |   |              |              |              |
|----|--------------|--------------|--------------|---|--------------|--------------|--------------|
| H  | -5.269888400 | 0.484514830  | 3.125271000  | H | -1.406853100 | 6.425921000  | -4.430721800 |
| C  | -8.139626500 | -0.222199860 | 1.275257700  | C | -4.379449000 | -0.067910040 | -5.179941000 |
| H  | -8.424021000 | 0.819071350  | 1.091976300  | H | -4.000933000 | -1.089484800 | -5.276138300 |
| H  | -8.342467000 | -0.796843000 | 0.367798630  | C | 2.630554000  | -1.168909500 | -6.061300300 |
| H  | -8.764958000 | -0.617896300 | 2.082466000  | C | 1.045654800  | -2.512126700 | -4.534710000 |
| C  | -2.125270800 | -0.565806600 | -0.105851500 | C | 1.410460500  | -3.799440400 | -5.230000000 |
| C  | -0.902294930 | -1.500164400 | 0.006190627  | C | 2.370907800  | -3.720095000 | -6.428102500 |
| C  | -2.780315200 | -0.361056830 | 1.276633600  | C | 2.795148400  | -2.364664800 | -7.025846500 |
| H  | -2.846180000 | -1.064177400 | -0.763730800 | H | 3.455223800  | -1.137307400 | -5.335542000 |
| C  | -1.355381000 | -2.859004000 | 0.570435700  | H | 2.611596800  | -0.216014670 | -6.597265000 |
| H  | -0.166047700 | -3.060296200 | 0.692924400  | H | 1.579124600  | -4.632459000 | -4.551646000 |
| H  | -0.436777440 | -1.632155500 | -0.973914800 | H | 3.134462400  | -4.493030500 | -6.466595600 |
| C  | -3.234758000 | -1.718206900 | 1.841448400  | H | 2.197514300  | -2.165003300 | -7.923444300 |
| H  | -2.051755000 | 0.081149110  | 1.965510200  | H | 3.840222600  | -2.414629700 | -7.350152500 |
| H  | -3.625605600 | 0.326075730  | 1.214727400  | H | 1.534000800  | -2.458583400 | -3.553261500 |
| C  | -2.062395600 | -2.709173200 | 1.928317000  | N | 1.387466000  | -1.334719500 | -5.345635000 |
| H  | -0.492099550 | -3.529862000 | 0.662998740  | C | 0.234987530  | -0.671446300 | -5.138533600 |
| H  | -2.041498700 | -3.326010500 | -0.150839910 | C | -0.424154100 | -1.828356000 | -4.358143300 |
| H  | -3.693095400 | -1.576698500 | 2.829401700  | O | -0.118617670 | 0.504979250  | -5.322847000 |
| H  | -4.011709000 | -2.131957800 | 1.185223100  | O | -0.776839500 | -1.463587200 | -3.094298600 |
| H  | -2.413577600 | -3.684693300 | 2.288072300  | C | -1.535811100 | -2.549987800 | -5.106107700 |
| H  | -1.337655700 | -2.342591800 | 2.670652200  | C | -1.877400300 | -2.273007400 | -6.435096000 |
| C  | -0.374522800 | 1.947369700  | -0.230463920 | C | -2.269561800 | -3.515305800 | -4.406433600 |
| C  | -0.473939450 | 2.198338300  | 1.286245800  | C | -2.919796000 | -2.962521300 | -7.061506000 |
| C  | 1.014599600  | 1.368211300  | -0.586248800 | H | -1.344489800 | -1.498403500 | -6.981567400 |
| H  | -0.429656830 | 2.911115600  | -0.752346460 | C | -3.299420400 | -4.215825600 | -5.032381000 |
| C  | 0.621286200  | 3.185570700  | 1.728990600  | H | -2.031876800 | -3.681936000 | -3.360040400 |
| H  | -0.332872840 | 1.249397800  | 1.817992600  | C | -3.630387300 | -3.940702400 | -6.363790500 |
| H  | -1.464628100 | 2.573991500  | 1.563674000  | H | -3.181921700 | -2.727424000 | -8.090496000 |
| C  | 2.115701400  | 2.347787600  | -0.147657650 | H | -3.856146300 | -4.968933600 | -4.478520000 |
| H  | 1.161283000  | 0.404148370  | -0.086498484 | H | -4.441581000 | -4.478351600 | -6.848445000 |
| H  | 1.076965700  | 1.174812400  | -1.662178900 | C | -5.855572000 | 0.000395000  | -5.572843600 |
| C  | 2.020336200  | 2.670966600  | 1.352510000  | H | -5.979815000 | -0.323449050 | -6.611856500 |
| H  | 0.555043300  | 3.358629500  | 2.810173300  | H | -6.476799500 | -0.639005660 | -4.940472600 |
| H  | 0.446513740  | 4.156610500  | 1.242827000  | H | -6.216038000 | 1.031037200  | -5.484063000 |
| H  | 3.101692700  | 1.930089400  | -0.385912240 | C | -3.518883200 | 0.844297230  | -6.038908500 |
| H  | 2.017205700  | 3.276013100  | -0.729228300 | H | -3.845833800 | 1.884802600  | -5.955723000 |
| H  | 2.785081400  | 3.404581500  | 1.635410900  | H | -2.467737200 | 0.788555260  | -5.752620000 |
| H  | 2.230802300  | 1.757977500  | 1.928645100  | C | -4.563055500 | 1.655437000  | -1.291999700 |
| C  | -4.136048000 | 4.360549000  | -0.652444200 | C | -3.268862500 | 2.087664100  | -0.905825730 |
| C  | -5.402013300 | 3.936084300  | -1.046769600 | C | -3.089693800 | 3.445779300  | -0.590626900 |
| C  | -5.602012600 | 2.594038500  | -1.353277700 | C | 0.943746100  | -4.171245600 | -6.612304000 |
| C  | -4.940090000 | 0.232885570  | -1.561469800 | H | 0.275531900  | -3.488085500 | -7.126291800 |
| C  | -4.737591700 | -0.398689150 | -2.802590000 | H | 0.735373140  | -5.219296500 | -6.807723500 |
| C  | -5.082499000 | -1.750722600 | -2.970295200 |   |              |              |              |
| C  | -5.693333000 | -2.438470800 | -1.930253100 |   |              |              |              |
| C  | -5.990989000 | -1.813998100 | -0.719840900 |   |              |              |              |
| C  | -5.618797300 | -0.477063860 | -0.545646100 |   |              |              |              |
| P  | -1.772510600 | 1.008286400  | -1.045641900 |   |              |              |              |
| H  | -2.109831600 | 3.820742000  | -0.324985000 |   |              |              |              |
| H  | -3.951269400 | 5.403643600  | -0.411756370 |   |              |              |              |
| H  | -6.226632600 | 4.640540000  | -1.114988300 |   |              |              |              |
| H  | -6.587535000 | 2.243714000  | -1.644462100 |   |              |              |              |
| O  | -4.211379000 | 0.365561900  | -3.800740700 |   |              |              |              |
| H  | -4.878249000 | -2.258976200 | -3.901803500 |   |              |              |              |
| H  | -5.959629500 | -3.482992600 | -2.069794000 |   |              |              |              |
| H  | -6.498062000 | -2.361772800 | 0.064332955  |   |              |              |              |
| Pd | -1.146265300 | 0.673218200  | -3.188585800 |   |              |              |              |
| C  | -1.291533500 | 2.656449300  | -3.440069700 |   |              |              |              |
| C  | -0.117479210 | 3.423466200  | -3.459182000 |   |              |              |              |
| C  | -2.509536300 | 3.269072500  | -3.762796900 |   |              |              |              |
| C  | -0.159401940 | 4.775983300  | -3.815427300 |   |              |              |              |
| H  | 0.839548470  | 2.968924800  | -3.213688400 |   |              |              |              |
| C  | -2.547318200 | 4.617770000  | -4.125586500 |   |              |              |              |
| H  | -3.429377000 | 2.696265000  | -3.715654400 |   |              |              |              |
| C  | -1.374278500 | 5.375272000  | -4.152417000 |   |              |              |              |
| H  | 0.759556530  | 5.358433000  | -3.833410300 |   |              |              |              |
| H  | -3.499893400 | 5.079571000  | -4.377439000 |   |              |              |              |

  

| R1-TS <sub>dis</sub> |              |              |              |  |  |  |  |
|----------------------|--------------|--------------|--------------|--|--|--|--|
| H                    | -3.889391153 | 1.619723033  | -7.090433581 |  |  |  |  |
| O                    | -5.695224519 | -0.081624227 | 0.458197835  |  |  |  |  |
| C                    | -6.641873323 | -0.692213139 | 1.352091304  |  |  |  |  |
| H                    | -6.359052535 | -1.740036243 | 1.525786192  |  |  |  |  |
| C                    | -6.502669046 | 0.081224339  | 2.657000407  |  |  |  |  |
| H                    | -6.730990582 | 1.138322966  | 2.488235593  |  |  |  |  |
| H                    | -7.191538656 | -0.312486971 | 3.410579409  |  |  |  |  |
| H                    | -5.482121661 | 0.006783353  | 3.040515415  |  |  |  |  |
| C                    | -8.054414543 | -0.612332222 | 0.773752101  |  |  |  |  |
| H                    | -8.326924774 | 0.436306082  | 0.614843779  |  |  |  |  |
| H                    | -8.123666502 | -1.135058199 | -0.183475245 |  |  |  |  |
| H                    | -8.776340481 | -1.059327182 | 1.465032608  |  |  |  |  |
| C                    | -2.052882993 | -0.447564670 | 0.028996117  |  |  |  |  |
| C                    | -0.808771824 | -1.350900746 | 0.156684073  |  |  |  |  |
| C                    | -2.693735157 | -0.203286705 | 1.410058553  |  |  |  |  |
| H                    | -2.768506697 | -0.991466369 | -0.597016969 |  |  |  |  |
| C                    | -1.220720795 | -2.700802876 | 0.769316271  |  |  |  |  |
| H                    | -0.068678205 | -0.872708989 | 0.812132518  |  |  |  |  |
| H                    | -0.354918067 | -1.507722474 | -0.825032971 |  |  |  |  |
| C                    | -3.107024262 | -1.552012093 | 2.024982963  |  |  |  |  |
| H                    | -1.971203583 | 0.288199656  | 2.072613298  |  |  |  |  |

|    |              |              |              |                         |              |              |              |
|----|--------------|--------------|--------------|-------------------------|--------------|--------------|--------------|
| H  | -3.563084209 | 0.451345767  | 1.324782973  | H                       | 0.993260912  | -1.835197278 | -3.281826045 |
| C  | -1.913771272 | -2.515815590 | 2.129426432  | N                       | 0.780424842  | -0.878046022 | -5.158318760 |
| H  | -0.340282982 | -3.346998800 | 0.875341117  | C                       | -0.463116457 | -0.357517395 | -5.347174203 |
| H  | -1.903324919 | -3.205806859 | 0.071716954  | C                       | -0.990706790 | -1.867142015 | -4.157953529 |
| H  | -3.553802413 | -1.392652184 | 3.014741311  | O                       | -0.838002518 | 0.401094465  | -6.223566627 |
| H  | -3.884811078 | -2.000598320 | 1.392047853  | O                       | -1.454560491 | -1.645830694 | -2.950450051 |
| H  | -2.240064956 | -3.484710246 | 2.527839650  | C                       | -1.892592600 | -2.765848725 | -4.982716444 |
| H  | -1.187620724 | -2.108942760 | 2.848970183  | C                       | -2.314876737 | -2.504628931 | -6.290884068 |
| C  | -0.343284547 | 2.081529074  | -0.293860495 | C                       | -2.368341989 | -3.916607102 | -4.335583055 |
| C  | -0.407304694 | 2.434368025  | 1.205949649  | C                       | -3.186618587 | -3.383949133 | -6.940693853 |
| C  | 1.044141738  | 1.485285396  | -0.627641077 | H                       | -1.983506027 | -1.605354819 | -6.798066554 |
| H  | -0.418198919 | 3.004532934  | -0.884170127 | C                       | -3.223969252 | -4.799820016 | -4.988811048 |
| C  | 0.680270658  | 3.471272600  | 1.543326765  | H                       | -2.070198823 | -4.094352812 | -3.307442879 |
| H  | -0.231668961 | 1.525670515  | 1.795297385  | C                       | -3.639715708 | -4.534688879 | -6.296937478 |
| H  | -1.395456554 | 2.808485801  | 1.492105471  | H                       | -3.514919781 | -3.160525479 | -7.952539143 |
| C  | 2.139889034  | 2.515199467  | -0.309085915 | H                       | -3.576019689 | -5.690890323 | -4.474829057 |
| H  | 1.213493601  | 0.577984163  | -0.036667470 | H                       | -4.316540102 | -5.216294144 | -6.805334109 |
| H  | 1.087631501  | 1.193054510  | -1.679571867 | C                       | -5.885731884 | 0.415394512  | -5.616769435 |
| C  | 2.080104435  | 2.961489740  | 1.161347562  | H                       | -6.038359909 | 0.302664972  | -6.694943141 |
| H  | 0.642760137  | 3.719880944  | 2.611069166  | H                       | -6.357135304 | -0.432529916 | -5.115050166 |
| H  | 0.468782942  | 4.401183399  | 0.995460268  | H                       | -6.387202395 | 1.333122214  | -5.291112598 |
| H  | 3.126309098  | 2.092655313  | -0.537382715 | C                       | -3.757136269 | 1.712593481  | -6.007245070 |
| H  | 2.007679170  | 3.383850432  | -0.969624766 | H                       | -4.239470957 | 2.637505079  | -5.674386288 |
| H  | 2.832455501  | 3.735034302  | 1.357869465  | H                       | -2.690436417 | 1.764381169  | -5.797781653 |
| H  | 2.333741592  | 2.105688452  | 1.804116779  | C                       | -4.538307930 | 1.649697409  | -1.298959501 |
| C  | -4.223382728 | 4.353800974  | -0.595719703 | C                       | -3.260727995 | 2.128191197  | -0.907943057 |
| C  | -5.478665979 | 3.876209912  | -0.963839990 | C                       | -3.132982265 | 3.488072853  | -0.573509565 |
| C  | -5.622701192 | 2.535386102  | -1.308708247 | C                       | 0.836442183  | -3.937022486 | -6.145883495 |
| C  | -4.822601913 | 0.236019033  | -1.692366596 | H                       | 0.075014454  | -3.467510099 | -6.759459291 |
| C  | -4.602614376 | -0.222765733 | -3.003563882 | H                       | 0.818969050  | -5.022688222 | -6.179164529 |
| C  | -4.831433158 | -1.566550815 | -3.333629727 | =====                   |              |              |              |
| C  | -5.351858857 | -2.423138011 | -2.372926958 | <b>R2<sub>dis</sub></b> |              |              |              |
| C  | -5.673710882 | -1.973133734 | -1.091326875 | =====                   |              |              |              |
| C  | -5.420575551 | -0.637835300 | -0.762755499 | H                       | -3.929422857 | 1.573543312  | -6.945184142 |
| P  | -1.744913218 | 1.072820970  | -1.005389194 | O                       | -5.772455227 | -0.192955914 | 0.554411044  |
| H  | -2.166007607 | 3.899280220  | -0.313941062 | C                       | -6.738611427 | -0.866475349 | 1.381010618  |
| H  | -4.083344404 | 5.399348291  | -0.335863711 | H                       | -6.391354914 | -1.888103530 | 1.590791878  |
| H  | -6.337041907 | 4.542006847  | -0.990851649 | C                       | -6.759186479 | -0.072849540 | 2.680925371  |
| H  | -6.594023747 | 2.148721484  | -1.603471363 | H                       | -7.058198986 | 0.960693734  | 2.480320454  |
| O  | -4.160988765 | 0.709890044  | -3.894979087 | H                       | -7.468556247 | -0.514868282 | 3.387225310  |
| H  | -4.591002641 | -1.940598089 | -4.320007445 | H                       | -5.767402943 | -0.060628725 | 3.139295928  |
| H  | -5.516083462 | -3.465678094 | -2.630797556 | C                       | -8.106871092 | -0.899072899 | 0.698904603  |
| H  | -6.112704542 | -2.650466151 | -0.369062366 | H                       | -8.444340590 | 0.124267256  | 0.504286099  |
| Pd | -1.268481334 | 0.469785793  | -3.142630963 | H                       | -8.070328617 | -1.435806158 | -0.252319432 |
| C  | -0.894382667 | 2.407275824  | -3.564579688 | H                       | -8.841939667 | -1.390858167 | 1.344546758  |
| C  | 0.427829002  | 2.801260118  | -3.831955526 | C                       | -2.041003336 | -0.304739449 | 0.315739260  |
| C  | -1.911944147 | 3.365466278  | -3.675154971 | C                       | -0.735570969 | -1.060713528 | 0.647236751  |
| C  | 0.722278435  | 4.115231081  | -4.207859085 | C                       | -2.832905021 | -0.047529925 | 1.614813846  |
| H  | 1.238182820  | 2.078000809  | -3.769670986 | H                       | -2.636838738 | -0.963565045 | -0.327684617 |
| C  | -1.617482580 | 4.679400466  | -4.051821048 | C                       | -1.075911532 | -2.413828909 | 1.296724076  |
| H  | -2.940678418 | 3.081489771  | -3.479899050 | H                       | -0.141444793 | -0.468672559 | 1.355763682  |
| C  | -0.300800621 | 5.060038252  | -4.315436793 | H                       | -0.132487173 | -1.212060093 | -0.248665343 |
| H  | 1.751198383  | 4.399103398  | -4.419958564 | C                       | -3.184954988 | -1.390909998 | 2.277988882  |
| H  | -2.422350865 | 5.406470475  | -4.138713988 | H                       | -2.222581518 | 0.546971217  | 2.305418574  |
| H  | -0.072655173 | 6.082489872  | -4.606346238 | H                       | -3.743740389 | 0.517998544  | 1.416322486  |
| C  | -4.389466315 | 0.514312195  | -5.318269969 | C                       | -1.929483205 | -2.231010094 | 2.562343049  |
| H  | -3.867955866 | -0.397243768 | -5.632260734 | H                       | -0.153682308 | -2.958276026 | 1.536079454  |
| C  | 1.997078625  | -0.661332978 | -5.917779186 | H                       | -1.624518539 | -3.026081061 | 0.566502915  |
| C  | 0.573747456  | -2.021031648 | -4.280211970 | H                       | -3.741305133 | -1.217739079 | 3.208200097  |
| C  | 1.197708290  | -3.294033831 | -4.831879021 | H                       | -3.854419880 | -1.947296151 | 1.606923347  |
| C  | 2.153627302  | -3.216036489 | -6.027463608 | H                       | -2.208146189 | -3.206269677 | 2.981468321  |
| C  | 2.323991053  | -1.891686633 | -6.783718941 | H                       | -1.325833883 | -1.721616177 | 3.328030553  |
| H  | 2.812765006  | -0.466721054 | -5.207656660 | C                       | -0.459422481 | 2.276335173  | -0.052092443 |
| H  | 1.851019056  | 0.233198657  | -6.528351526 | C                       | -0.570691003 | 2.624111083  | 1.445390261  |
| H  | 1.487341920  | -3.988465206 | -4.046712323 | C                       | 0.967570131  | 1.769491652  | -0.368920347 |
| H  | 3.048840602  | -3.828988487 | -5.955185083 | H                       | -0.577826296 | 3.195972629  | -0.641109682 |
| H  | 1.668831477  | -1.879336455 | -7.662462843 | C                       | 0.451946133  | 3.715936298  | 1.809791741  |
| H  | 3.350872626  | -1.803076937 | -7.155287866 | H                       | -0.362284261 | 1.726078252  | 2.040434559  |

H -1.583219116 2.945992309 1.709053222  
 C 1.996059612 2.857004002 -0.019640251  
 H 1.183234241 0.863917447 0.209628061  
 H 1.043470943 1.497023137 -1.426036860  
 C 1.884210795 3.283127238 1.453720554  
 H 0.379963878 3.957173281 2.877671636  
 H 0.202796970 4.635934805 1.261015137  
 H 3.009676317 2.496272390 -0.235207419  
 H 1.823104249 3.725021181 -0.671518214  
 H 2.591888856 4.091909582 1.673452905  
 H 2.168033590 2.434079667 2.093126658  
 C -4.446994550 4.320073141 -0.398344748  
 C -5.667669677 3.776178764 -0.789830233  
 C -5.727016105 2.433305955 -1.150860081  
 C -4.778691844 0.189113833 -1.536761005  
 C -4.473168873 -0.253178423 -2.835588893  
 C -4.621372774 -1.601863872 -3.181317522  
 C -5.132221087 -2.495796283 -2.249627999  
 C -5.531323722 -2.071692568 -0.982739977  
 C -5.376810270 -0.723604629 -0.642131553  
 P -1.775279285 1.178160491 -0.804111038  
 H -2.371723225 3.985216879 -0.092047824  
 H -4.371100409 5.368842093 -0.124826238  
 H -6.563345144 4.390752095 -0.821524014  
 H -6.669967417 1.993084347 -1.461060897  
 O -4.048263876 0.692561537 -3.723658711  
 H -4.350838230 -1.946094536 -4.168962581  
 H -5.235940551 -3.542187431 -2.522932672  
 H -5.966213643 -2.774762604 -0.282925171  
 Pd -1.045429084 0.705646453 -3.078999224  
 C -1.007930987 2.695603559 -3.389053576  
 C 0.219044085 3.371491112 -3.470298042  
 C -2.195813785 3.430631255 -3.458559601  
 C 0.252603720 4.761527653 -3.607494796  
 H 1.153625325 2.819296227 -3.441276817  
 C -2.156777759 4.821188245 -3.604738247  
 H -3.150508792 2.925536499 -3.382387389  
 C -0.936299779 5.491949614 -3.676146371  
 H 1.211423083 5.271660936 -3.672072536  
 H -3.090524363 5.377712278 -3.650722330  
 H -0.909205448 6.573050912 -3.787930605  
 C -4.382994804 0.527086571 -5.130395399  
 H -3.932455534 -0.405284941 -5.490222756  
 C 1.847703536 -0.295254477 -6.181150788  
 C 0.913721320 -1.399815912 -4.131610639  
 H 1.682077595 -2.661598944 -4.550884628  
 C 2.360001169 -2.751173093 -5.912188987  
 C 2.100550306 -1.618232244 -6.906207551  
 H 2.770162598 0.030701555 -5.672644020  
 H 1.542564732 0.488861163 -6.874995612  
 H 2.238535645 -3.077394271 -3.714781450  
 H 3.367291304 -3.161348451 -5.912716674  
 H 1.230574403 -1.848860066 -7.532514582  
 H 2.957557509 -1.507564826 -7.579943682  
 H 1.458654344 -0.968369664 -3.277101698  
 N 0.771596354 -0.426598214 -5.200640435  
 C -0.201400584 0.580781901 -5.050701866  
 C -0.482473843 -1.748980899 -3.582841963  
 O -0.428139813 1.321772332 -5.999332794  
 O -0.724302127 -1.574097498 -2.372904270  
 C -1.480775109 -2.495023762 -4.413292739  
 C -1.828530602 -2.160988565 -5.731444769  
 C -2.078729065 -3.610191620 -3.807284677  
 C -2.756566089 -2.939633385 -6.423794673  
 H -1.400561039 -1.284784034 -6.201304689  
 C -2.980770887 -4.402320437 -4.513608637  
 H -1.824058688 -3.844091268 -2.778791010  
 C -3.326469451 -4.065815148 -5.824184654

H -3.036241107 -2.662195639 -7.436313945  
 H -3.423969449 -5.273106121 -4.038023269  
 H -4.042043231 -4.672105400 -6.372997120  
 C -5.900958292 0.490092696 -5.308044087  
 H -6.151166658 0.417341167 -6.371321549  
 H -6.354975631 -0.358606320 -4.790194414  
 H -6.338276959 1.412639748 -4.911543079  
 C -3.748112790 1.692103376 -5.871223128  
 H -4.193743268 2.639080962 -5.551542400  
 H -2.670774728 1.736312899 -5.707333572  
 C -4.591024152 1.615146598 -1.132309775  
 C -3.347803840 2.158375497 -0.718738549  
 C -3.308204307 3.519197475 -0.369378873  
 C 1.231686805 -3.684895790 -5.570255030  
 H 0.294457578 -3.532737681 -6.093147298  
 H 1.449138219 -4.725600164 -5.345573210

R2-TS<sub>dis</sub>

H -5.832427299 1.648229137 -5.843213419  
 O -6.299536322 0.519467012 0.269440060  
 C -7.258922808 0.163845476 1.280589452  
 H -7.010727191 -0.827101934 1.684620639  
 C -7.078051181 1.204284022 2.378534337  
 H -7.261057784 2.206113465 1.977829825  
 H -7.778545480 1.019635305 3.198869948  
 H -6.058567267 1.172270574 2.771507444  
 C -8.671707989 0.166401706 0.697169445  
 H -8.912521814 1.166072805 0.321470914  
 H -8.766158131 -0.541175263 -0.130533323  
 H -9.403840621 -0.102031070 1.465739571  
 C -2.494153290 -0.527194498 0.127664249  
 C -1.395373607 -1.488219465 0.623877580  
 C -3.262209260 0.052125163 1.334801356  
 H -3.198215226 -1.135102069 -0.451873065  
 C -2.025161396 -2.641482232 1.424689751  
 H -0.698691580 -0.946792766 1.275936008  
 H -0.814456158 -1.878769148 -0.215970908  
 C -3.898885623 -1.089140301 2.148868061  
 H -2.571805780 0.606454917 1.979959816  
 H -4.032254287 0.755206628 1.012777719  
 C -2.847237813 -2.110648189 2.611386348  
 H -1.243192152 -3.325232528 1.779224821  
 H -2.678234563 -3.223044032 0.757500498  
 H -4.437091300 -0.679444302 3.013735682  
 H -4.643990123 -1.597960768 1.522414941  
 H -3.327033607 -2.939924012 3.146450585  
 H -2.166822860 -1.626523304 3.327378199  
 C -0.446478557 1.659598701 -0.413625241  
 C -0.665843052 2.290758457 0.975082843  
 C 0.881228253 0.866211665 -0.431116087  
 H -0.310479956 2.465762959 -1.147379987  
 C 0.501218453 3.229491170 1.328172975  
 H -0.713128646 1.493128661 1.727121378  
 H -1.618962033 2.827426778 1.023342704  
 C 2.056763944 1.788843558 -0.065434927  
 H 0.839175457 0.045950309 0.294608889  
 H 1.051488827 0.411222308 -1.409680473  
 C 1.842319157 2.478878734 1.291398851  
 H 0.338189297 3.677960981 2.316508094  
 H 0.526634816 4.057974313 0.604945123  
 H 2.990230817 1.212840021 -0.060426268  
 H 2.160400204 2.553392316 -0.846433738  
 H 2.670760036 3.164919398 1.508300943  
 H 1.846497109 1.719605915 2.087717344  
 C -3.903013231 4.292390462 -1.480319806  
 C -5.235074949 3.928911795 -1.667882898  
 C -5.559650051 2.577248941 -1.714447821

C -5.058712518 0.160813136 -1.691454483  
C -4.676692505 -0.681950388 -2.749182368  
C -5.043146683 -2.034728525 -2.757822419  
C -5.862407052 -2.533192247 -1.753782515  
C -6.330583933 -1.701940392 -0.735783566  
C -5.931507004 -0.362247636 -0.705050441  
P -1.862587412 0.686530545 -1.176379366  
H -1.905963712 3.634744374 -1.179276417  
H -3.613890078 5.339821706 -1.456177307  
H -6.008063798 4.683047859 -1.785613409  
H -6.590128264 2.272145266 -1.869230294  
O -3.874099183 -0.193438057 -3.751589967  
H -4.670538839 -2.670072013 -3.549843339  
H -6.151458145 -3.580598718 -1.760476217  
H -6.981782602 -2.104669866 0.029835843  
Pd -1.202885973 0.169508898 -3.494048534  
C -0.302201648 1.996748367 -4.136828446  
C 1.010389836 2.243958109 -3.690474577  
C -1.199905802 3.078404244 -4.218935887  
C 1.406391145 3.540948391 -3.349835672  
H 1.713054269 1.432801237 -3.545421999  
C -0.806443620 4.362378396 -3.853702150  
H -2.197590478 2.896655329 -4.603688293  
C 0.501986691 4.601468768 -3.421443609  
H 2.424771136 3.715148018 -3.010808848  
H -1.523059498 5.178367013 -3.907737622  
H 0.813776007 5.606007725 -3.147087844  
C -4.486224630 0.176303858 -5.031200964  
H -3.617665150 0.518794061 -5.592798781  
C 0.544535577 0.381550289 -7.551705923  
C 1.413527302 -0.472524442 -5.410347209  
C 2.213248135 -1.505029223 -6.219859182  
C 1.995086763 -1.675923725 -7.712050007  
C 0.866074853 -0.873650582 -8.360762337  
H 1.398030554 1.078942518 -7.592054356  
H -0.336476912 0.890939614 -7.939634151  
H 3.238015625 -1.561544596 -5.863063477  
H 2.892811914 -1.800714578 -8.312955855  
H -0.040655539 -1.484273946 -8.450863902  
H 1.151545802 -0.578095520 -9.376547507  
H 2.116809161 0.343045086 -5.193853959  
N 0.272784659 0.054680233 -6.143384835  
C -0.765815880 0.743750294 -5.509313872  
C 1.112037359 -1.112368723 -4.043312255  
O -1.726649566 1.132257672 -6.179858493  
O 1.963149492 -0.946762731 -3.167952384  
C -0.018489189 -2.086897341 -3.821855003  
C -1.049690639 -2.377629855 -4.745330669  
C 0.004548673 -2.799414350 -2.603190171  
C -2.012124141 -3.343961692 -4.445130461  
H -1.092381434 -1.859522499 -5.693806053  
C -0.960854907 -3.754574442 -2.311927970  
H 0.804437966 -2.575091022 -1.906111145  
C -1.975715524 -4.031210613 -3.233350457  
H -2.793871536 -3.555017859 -5.169296054  
H -0.926961309 -4.283348941 -1.363312629  
H -2.734521357 -4.773902626 -3.003090993  
C -5.107140950 -1.021276636 -5.745598861  
H -5.403664627 -0.721252359 -6.756497665  
H -4.381798616 -1.835864478 -5.831346409  
H -5.997040425 -1.035200770 -5.229380073  
C -5.463804394 1.332844338 -4.861082963  
H -6.325695119 1.044189081 -4.249370042  
H -4.972926598 2.183263008 -4.384055981  
C -4.587660067 1.574250572 -1.584019443  
C -3.237087555 1.936553877 -1.338268160  
C -2.929312115 3.310005299 -1.314773013  
C 1.647876777 -2.794679144 -6.761607807

H 0.594873567 -3.008354264 -6.614684945  
H 2.286574820 -3.672582464 -6.720258474

**3b**

C -2.008694004 0.717615266 -6.325371669  
C -2.368294350 -0.273469217 -7.248787480  
C -2.857790233 1.810661927 -6.117019400  
C -3.555032001 -0.158826023 -7.970937629  
H -1.728272255 -1.141436070 -7.372153924  
C -4.036318936 1.930796464 -6.849753787  
H -2.581642655 2.548673924 -5.370996582  
C -4.385648874 0.947409070 -7.779065921  
H -3.836101681 -0.935601991 -8.676278494  
H -4.687754857 2.785489096 -6.691827530  
H -5.308900968 1.037689998 -8.344607817  
C 0.770564821 0.294071186 -7.388157866  
C 1.409346743 -0.291742164 -5.077357029  
C 2.495684525 -1.182664275 -5.686098399  
C 2.498204300 -1.518322354 -7.169961895  
C 1.409547854 -0.919152174 -8.057344122  
H 1.504396360 1.114700104 -7.332304667  
H -0.079208415 0.658618078 -7.964406392  
H 3.463009443 -1.051665376 -5.208006038  
H 3.481409059 -1.599009458 -7.626741833  
H 0.635096430 -1.664375472 -8.274591513  
H 1.833385532 -0.608195969 -9.018415108  
H 1.847082886 0.669680123 -4.780567241  
N 0.322099423 -0.034047641 -6.026075432  
C -0.784703247 0.595506417 -5.472069424  
C 0.853213155 -1.029440553 -3.840956625  
O -0.786298673 0.978284423 -4.304516903  
O 0.016406142 -1.905785236 -3.987166261  
C 1.421594443 -0.724467584 -2.492140787  
C 2.532653686 0.105187615 -2.282462372  
C 0.801609557 -1.325606383 -1.385489818  
C 3.011712061 0.329022872 -0.991736875  
H 3.037907422 0.575340793 -3.119179184  
C 1.271877285 -1.092963207 -0.098023867  
H -0.053650494 -1.967483788 -1.567081475  
C 2.379825465 -0.264298149 0.101982447  
H 3.875097005 0.970233391 -0.839781240  
H 0.776862348 -1.554605430 0.751606749  
H 2.748733317 -0.081864228 1.107499575  
C 2.145949455 -2.572410388 -6.151799457  
H 1.100389357 -2.853324512 -6.062668636  
H 2.851132890 -3.374580772 -5.956100657

**R1'**

C -0.724649751 2.785790923 2.316867570  
C 0.571479484 2.384683990 2.714381115  
C 1.135182968 2.977202234 3.863167062  
C 0.456954325 3.939630979 4.603598611  
C -0.820892098 4.335786973 4.208743674  
C -1.391278249 3.759413459 3.079972159  
C -1.456541705 2.288205485 1.112625768  
C -1.546339365 3.115321445 -0.023983266  
C -2.227717210 2.689859074 -1.169937130  
C -2.892207275 1.463222710 -1.135702769  
C -2.895899817 0.665503962 0.002750830  
C -2.171623470 1.075084937 1.134917798  
P 1.563044394 1.060164940 1.889161201  
H 2.122476213 2.674321694 4.195579581  
H 0.924758921 4.371840042 5.483810523  
H -1.367094972 5.084944042 4.774983462  
H -2.382677451 4.063062436 2.757529096  
O -0.910101007 4.321724657 0.097843260

|    |              |              |              |                              |              |              |              |
|----|--------------|--------------|--------------|------------------------------|--------------|--------------|--------------|
| H  | -2.255932152 | 3.299433031  | -2.063794291 | H                            | 4.097518886  | -0.356576066 | 1.299627506  |
| H  | -3.438881547 | 1.132647816  | -2.014245818 | C                            | 5.122758557  | 3.409983297  | 1.974184725  |
| H  | -3.427490352 | -0.275575868 | -0.001848326 | H                            | 3.404937959  | 3.264822684  | 0.667552382  |
| Pd | 0.799169043  | 0.413703914  | -0.146249838 | H                            | 3.003787022  | 3.730206108  | 2.312093882  |
| C  | 1.874877349  | 1.730525031  | -1.208038517 | C                            | 6.053824813  | 2.520819578  | 1.136916936  |
| C  | 2.730517139  | 1.129792444  | -2.152816855 | H                            | 6.388246566  | 0.406014554  | 0.743873389  |
| C  | 1.746950503  | 3.126615562  | -1.224172423 | H                            | 6.021043215  | 0.779121486  | 2.425561365  |
| C  | 3.403382860  | 1.897944255  | -3.109195611 | H                            | 5.299973570  | 4.469189980  | 1.750878661  |
| H  | 2.891466989  | 0.052676614  | -2.143371160 | H                            | 5.348665250  | 3.272359224  | 3.042435879  |
| C  | 2.424730766  | 3.894334643  | -2.178071650 | H                            | 7.103952466  | 2.748624282  | 1.357570579  |
| H  | 1.116906493  | 3.614661455  | -0.490767420 | H                            | 5.895578983  | 2.741789104  | 0.071756600  |
| C  | 3.253255553  | 3.286176421  | -3.124132205 | C                            | 0.001319414  | 6.388701800  | -0.554484559 |
| H  | 4.056143830  | 1.411140823  | -3.830613954 | H                            | 1.002838556  | 5.952769995  | -0.549809368 |
| H  | 2.310542181  | 4.976349699  | -2.179317035 | H                            | -0.020318724 | 7.208422467  | -1.279211984 |
| H  | 3.783287995  | 3.887260986  | -3.858141657 | H                            | -0.197750088 | 6.795457189  | 0.441999080  |
| C  | -1.049983005 | 5.342333721  | -0.906950570 | C                            | -2.460272892 | 5.933690577  | -0.892834362 |
| H  | -0.814983244 | 4.910679367  | -1.890153871 | H                            | -2.551064353 | 6.713611958  | -1.656037102 |
| C  | -2.839769011 | -1.820023399 | -3.074909518 | H                            | -3.222485823 | 5.175303192  | -1.082886218 |
| C  | -0.602554098 | -1.333173042 | -1.927212301 | H                            | -2.659480840 | 6.381438856  | 0.086273373  |
| C  | 0.152902333  | -1.692059953 | -3.186293272 | O                            | -2.103850025 | 0.381485642  | 2.297217497  |
| C  | -0.650633129 | -2.230375991 | -4.380463470 | C                            | -2.909416219 | -0.813034358 | 2.461346282  |
| C  | -2.159014898 | -2.515891573 | -4.274182424 | H                            | -2.837703976 | -1.421158896 | 1.557998053  |
| H  | -3.057731852 | -0.770344855 | -3.314998607 | C                            | -4.355683769 | -0.416031250 | 2.755534330  |
| H  | -3.778099313 | -2.309989385 | -2.800762362 | H                            | -4.407104008 | 0.153128108  | 3.690084958  |
| H  | 0.962386423  | -1.007799689 | -3.429469677 | H                            | -4.772286565 | 0.202276102  | 1.955506582  |
| H  | -0.323079240 | -1.872817408 | -5.353600571 | H                            | -4.979718305 | -1.310214230 | 2.855163287  |
| H  | -2.314411875 | -3.597312278 | -4.182921940 | C                            | -2.276062846 | -1.593477617 | 3.601249148  |
| H  | -2.659813601 | -2.203415025 | -5.197325224 | H                            | -2.900926306 | -2.454988233 | 3.857345174  |
| H  | -0.626536707 | -0.224209311 | -1.827607813 | H                            | -1.294495546 | -1.960394383 | 3.298250481  |
| N  | -1.957252686 | -1.856414847 | -1.934505296 | H                            | -2.169529398 | -0.961576108 | 4.489949820  |
| C  | -1.920941004 | -2.505741473 | -0.731483444 | C                            | 0.316463239  | -3.117414399 | -3.638718182 |
| C  | -0.441237223 | -2.052709586 | -0.469852283 | H                            | -0.108987312 | -3.892818399 | -3.006816499 |
| O  | -2.779444522 | -3.124030727 | -0.126249469 | H                            | 1.255566285  | -3.397189531 | -4.107668425 |
| O  | -0.322517238 | -1.199928506 | 0.597434357  | <hr/> <hr/>                  |              |              |              |
| C  | 0.578745408  | -3.176340606 | -0.426899609 | <b>R1'-TS<sub>prox</sub></b> |              |              |              |
| C  | 1.909291805  | -2.932573964 | -0.796628575 | <hr/> <hr/>                  |              |              |              |
| C  | 0.234867807  | -4.439009086 | 0.065512571  | C                            | -0.951400039 | 3.544861620  | 1.824376234  |
| C  | 2.876617440  | -3.927129291 | -0.678406081 | C                            | 0.384707167  | 3.209841650  | 2.128998053  |
| H  | 2.185354619  | -1.953092172 | -1.177391193 | C                            | 0.941867238  | 3.698200400  | 3.329285922  |
| C  | 1.203844359  | -5.439771478 | 0.184111745  | C                            | 0.213707822  | 4.482395768  | 4.217013637  |
| H  | -0.794233596 | -4.630423068 | 0.355363065  | C                            | -1.113299978 | 4.794073201  | 3.921355134  |
| C  | 2.524887201  | -5.188148309 | -0.186105933 | C                            | -1.674948403 | 4.329611812  | 2.738497082  |
| H  | 3.903691003  | -3.722916979 | -0.971398823 | C                            | -1.671353240 | 3.205848396  | 0.559316376  |
| H  | 0.924356174  | -6.417269186 | 0.569123176  | C                            | -1.794950000 | 4.204620102  | -0.426793994 |
| H  | 3.277293011  | -5.967187947 | -0.094290047 | C                            | -2.526852729 | 3.976617318  | -1.596600029 |
| C  | 1.338281020  | -0.427435581 | 3.014484901  | C                            | -3.178110327 | 2.752963893  | -1.744923613 |
| C  | 2.203812332  | -1.626536814 | 2.582091455  | C                            | -3.118576895 | 1.765783731  | -0.768974439 |
| C  | 1.498305814  | -0.168465828 | 4.526006544  | C                            | -2.365390314 | 1.991370457  | 0.395730650  |
| H  | 0.294696514  | -0.675883981 | 2.797359023  | P                            | 1.436302058  | 2.082760043  | 1.104915488  |
| C  | 1.801998816  | -2.888689667 | 3.357938031  | H                            | 1.967490920  | 3.456974158  | 3.584496110  |
| H  | 3.259901309  | -1.413003872 | 2.797090587  | H                            | 0.678680105  | 4.840215906  | 5.131117806  |
| H  | 2.101388396  | -1.801979394 | 1.511291217  | H                            | -1.703861778 | 5.400392194  | 4.602938561  |
| C  | 1.156111373  | -1.437683187 | 5.333144193  | H                            | -2.701113227 | 4.582892596  | 2.488184927  |
| H  | 2.534227588  | 0.130272263  | 4.746987042  | O                            | -1.130121709 | 5.369202740  | -0.146469042 |
| H  | 0.848912195  | 0.647213419  | 4.854428043  | H                            | -2.601536219 | 4.730693645  | -2.369562238 |
| C  | 1.953682011  | -2.665544051 | 4.869203212  | H                            | -3.758080846 | 2.567464196  | -2.644575955 |
| H  | 2.415434624  | -3.733868454 | 3.023986076  | H                            | -3.629768645 | 0.826633101  | -0.928469975 |
| H  | 0.763687850  | -3.142925300 | 3.109243118  | Pd                           | 0.684416994  | 1.569125536  | -1.015697052 |
| H  | 1.331229224  | -1.246523378 | 6.399509254  | C                            | 1.753580071  | 2.973518007  | -1.986786231 |
| H  | 0.084422528  | -1.642663054 | 5.224109644  | C                            | 2.838041080  | 2.560986337  | -2.782659055 |
| H  | 1.634208380  | -3.554257433 | 5.427572174  | C                            | 1.391305047  | 4.327493032  | -2.019898057 |
| H  | 3.018379528  | -2.514390904 | 5.103102218  | C                            | 3.531824860  | 3.470883492  | -3.588306240 |
| C  | 3.366000848  | 1.583874008  | 2.025807890  | H                            | 3.151429859  | 1.519242494  | -2.788028703 |
| C  | 4.278672297  | 0.706919617  | 1.135645620  | C                            | 2.079747446  | 5.236625067  | -2.832159315 |
| C  | 3.643718156  | 3.072277381  | 1.718618482  | H                            | 0.588564169  | 4.678573024  | -1.385726412 |
| H  | 3.628306286  | 1.389062201  | 3.077162045  | C                            | 3.155274108  | 4.815360323  | -3.616728085 |
| C  | 5.760635928  | 1.034397578  | 1.387513775  | H                            | 4.368248376  | 3.125588532  | -4.192375745 |
| H  | 4.034490188  | 0.909821049  | 0.088407764  | H                            | 1.778551508  | 6.282337956  | -2.842848456 |

H 3.694189181 5.524167099 -4.239704064  
C -1.310229973 6.541022818 -0.963311543  
H -1.194192271 6.265384497 -2.021229566  
C -2.551061329 0.339528617 -4.460407978  
C -0.445111053 0.743181349 -3.142195553  
C 0.402989903 0.650398083 -4.374918195  
C -0.295516772 0.310589019 -5.703894243  
C -1.789632778 -0.050336426 -5.744825484  
H -2.795974486 1.410254918 -4.471103368  
H -3.479358287 -0.227200036 -4.345639274  
H 1.185094287 1.400396395 -4.429508579  
H 0.064782368 0.863999270 -6.567957696  
H -1.897639202 -1.130280339 -5.902433202  
H -2.266714504 0.440316655 -6.600638258  
H -0.641555283 1.800760423 -2.893965992  
N -1.716699275 0.076103743 -3.307886850  
C -1.850794123 -0.786332776 -2.282790526  
C -0.462186864 -0.623554546 -1.627161880  
O -2.805245468 -1.476262224 -1.944938678  
O -0.418112525 -0.153120637 -0.405341974  
C 0.537373346 -1.705600839 -1.964890919  
C 1.905105689 -1.426357686 -2.068703787  
C 0.100416653 -3.029301272 -2.095876473  
C 2.824526062 -2.447378865 -2.291690627  
H 2.238588144 -0.359476650 -1.985540195  
C 1.022747685 -4.054451893 -2.321257283  
H -0.959711057 -3.250199429 -2.012185781  
C 2.384210496 -3.767916483 -2.419147786  
H 3.882838883 -2.213507717 -2.375174351  
H 0.674220916 -5.079363021 -2.417491015  
H 3.099530080 -4.566430005 -2.596857597  
C 1.322896236 0.459710864 2.056957061  
C 2.200469215 -0.657251490 1.456759557  
C 1.525823991 0.525095866 3.583218305  
H 0.276120812 0.206288190 1.856795101  
C 1.846757222 -2.018792871 2.073535631  
H 3.256252953 -0.447638416 1.672275944  
H 2.080643606 -0.700990870 0.374536788  
C 1.204039252 -0.841024900 4.223309510  
H 2.566783610 0.799641967 3.810660193  
H 0.883607096 1.286481641 4.032521756  
C 2.013652056 -1.988443586 3.600044087  
H 2.479171641 -2.797354376 1.629616604  
H 0.811455129 -2.271070860 1.810101679  
H 1.382021879 -0.788861085 5.304797410  
H 0.132959812 -1.042701817 4.090522725  
H 1.713421636 -2.946544199 4.042134514  
H 3.078411053 -1.850744466 3.840920150  
C 3.170648565 2.775008991 1.309613435  
C 4.209656056 2.015898777 0.455079800  
C 3.238614694 4.289229223 1.001405360  
H 3.429564321 2.617441240 2.367171406  
C 5.625851456 2.572359528 0.685211704  
H 3.945608585 2.130160195 -0.599499832  
H 4.194075998 0.946479399 0.674629780  
C 4.656225600 4.837740329 1.232147877  
H 2.957503841 4.448802899 -0.044170394  
H 2.519667012 4.845158349 1.609434591  
C 5.691095995 4.077798031 0.390194778  
H 6.339191655 2.025485430 0.056385049  
H 5.924792201 2.391900389 1.728717508  
H 4.676708225 5.908231118 0.993785020  
H 4.915245085 4.747600066 2.298013169  
H 6.700474953 4.463251752 0.580003711  
H 5.477890241 4.244777145 -0.675267263  
C -0.171214423 7.472851759 -0.566927425  
H 0.796240880 6.993429923 -0.737275549  
H -0.214401619 8.397855802 -1.150300287

H -0.246982350 7.723479411 0.495784259  
C -2.685796641 7.160301948 -0.720158466  
H -2.813804677 8.058033078 -1.334025830  
H -3.488509413 6.459488470 -0.962147065  
H -2.780933407 7.441759423 0.333559965  
O -2.258335144 1.112151307 1.422681887  
C -2.978983946 -0.145557913 1.361841953  
H -2.892492793 -0.560066897 0.354066545  
C -4.439877624 0.086460579 1.743888903  
H -4.505297057 0.461828927 2.770676635  
H -4.915124555 0.815223242 1.081724915  
H -5.001450952 -0.851197357 1.677640006  
C -2.265283252 -1.081502479 2.323660604  
H -2.811307068 -2.026976753 2.402415543  
H -1.260285959 -1.291786197 1.955437372  
H -2.199332628 -0.632404144 3.320699781  
C 0.676673980 -0.655768425 -5.076415237  
H 0.258966777 -1.559151593 -4.641164420  
H 1.655513084 -0.794070388 -5.527380108

R2<sub>prox</sub>

C -3.026426992 2.057297440 2.764290453  
C -1.706852260 1.750380686 3.183597066  
C -1.079142181 2.631814522 4.085438073  
C -1.697856600 3.788494429 4.548909724  
C -2.982359259 4.101570591 4.109144614  
C -3.627061332 3.239421142 3.230292071  
C -3.897728330 1.215601568 1.883413391  
C -4.326684023 1.697804405 0.622686562  
C -5.257185499 0.985187622 -0.137300807  
C -5.769083777 -0.217898915 0.347691503  
C -5.394149678 -0.698978185 1.592422969  
C -4.486405030 0.035329532 2.362157437  
P -0.764707360 0.252856947 2.604429886  
H -0.074104343 2.419216321 4.431348361  
H -1.174385629 4.440853994 5.242540309  
H -3.480598004 5.004944895 4.450427762  
H -4.631463878 3.469810937 2.887676198  
O -3.779178978 2.886099027 0.227722163  
H -5.574020584 1.348524194 -1.106145986  
H -6.457572971 -0.791878758 -0.265045267  
H -5.776200491 -1.642351548 1.963780979  
Pd -1.577099375 -0.465235739 0.386817640  
C -0.390906572 0.828438825 -0.576932059  
C 0.790469707 0.369335302 -1.183061089  
C -0.693270294 2.195370707 -0.641443856  
C 1.665325844 1.264153130 -1.807929257  
H 1.025281017 -0.691771608 -1.181804276  
C 0.180232466 3.086038961 -1.277729090  
H -1.592935569 2.572531237 -0.170047314  
C 1.366637779 2.629203115 -1.855731509  
H 2.580768789 0.891364010 -2.262981098  
H -0.058908733 4.147580795 -1.299402742  
H 2.048421990 3.324655061 -2.337949683  
C -4.358189835 3.626978886 -0.864898651  
H -4.488407061 2.958413681 -1.726646024  
C -4.544537021 -1.447127030 -2.701741919  
C -2.519393551 -0.637482699 -1.534343310  
C -1.721682302 -0.806167161 -2.809882815  
C -2.384713411 -1.413822146 -4.045210161  
C -3.811665307 -1.965467501 -3.950160966  
H -4.789876743 -0.383919817 -2.803361269  
H -5.460061172 -2.009187174 -2.505340062  
H -1.055545452 0.026649179 -3.004952254  
H -2.130531244 -0.951363222 -4.996391444  
H -3.797397268 -3.061764191 -3.909260415  
H -4.385107354 -1.691448318 -4.843787384

H -2.972793070 0.361115140 -1.560178656  
N -3.651969850 -1.579329509 -1.547403277  
C -3.748300443 -2.675304982 -0.776744942  
C -2.643589743 -2.906198412 0.250920352  
O -4.641101558 -3.530843499 -0.829249052  
O -2.663369427 -2.309934389 1.342826178  
C -1.653017988 -3.974351560 -0.050722017  
C -0.353805180 -3.847871802 0.469553657  
C -1.963271540 -5.062052457 -0.881544632  
C 0.620599380 -4.790260387 0.158695800  
H -0.109808868 -2.985476547 1.076680208  
C -0.986739655 -6.012639908 -1.174021970  
H -2.969423726 -5.162950626 -1.272170181  
C 0.305408566 -5.876292513 -0.662802989  
H 1.627780970 -4.673517385 0.549320322  
H -1.234056077 -6.858331963 -1.809382921  
H 1.066890408 -6.612278928 -0.906684875  
C -0.995400287 -0.918730390 4.086856612  
C -0.628143059 -2.386841748 3.792063167  
C -0.330086565 -0.448554878 5.396460054  
H -2.081798150 -0.877918304 4.212729821  
C -0.994241426 -3.300867507 4.973153758  
H 0.449582297 -2.482489177 3.605364157  
H -1.158022539 -2.718157932 2.902245881  
C -0.689987338 -1.372993468 6.574843597  
H 0.762645379 -0.452022063 5.279751347  
H -0.627445276 0.577088924 5.636597496  
C -0.330752411 -2.834978520 6.275801184  
H -0.706787052 -4.333928308 4.740310935  
H -2.086546416 -3.302015762 5.097757820  
H -0.177753757 -1.027805019 7.482005599  
H -1.766440387 -1.300998800 6.775359489  
H -0.625474590 -3.479998877 7.112982152  
H 0.761272232 -2.925919737 6.176646361  
C 1.051782286 0.768569484 2.737657540  
C 1.960383158 -0.376198994 2.233134003  
C 1.437067603 2.086449540 2.031688637  
H 1.255062795 0.897734101 3.808806274  
C 3.448359312 -0.039782151 2.441017918  
H 1.763040516 -0.538152665 1.167561296  
H 1.729451247 -1.313132649 2.747850474  
C 2.914755507 2.426337330 2.287992214  
H 1.290246585 1.980664463 0.959432009  
H 0.796865737 2.911958425 2.354452660  
C 3.827530331 1.297109013 1.787032450  
H 4.068685856 -0.852926543 2.043167346  
H 3.656424164 0.013369107 3.520226565  
H 3.163789655 3.369331140 1.785943803  
H 3.083396888 2.586044919 3.364171489  
H 4.880988761 1.532628627 1.983889398  
H 3.714727501 1.210975947 0.697387573  
C -3.336342537 4.698318791 -1.224884693  
H -2.417044325 4.246901861 -1.602490761  
H -3.741903240 5.360783415 -1.995834591  
H -3.095756649 5.296554567 -0.340095958  
C -5.702586442 4.219907375 -0.441815293  
H -6.152472154 4.776580738 -1.270405662  
H -6.403685906 3.441655778 -0.129119425  
H -5.552608528 4.906943729 0.397681653  
O -4.151296007 -0.375226101 3.630354853  
C -5.242886608 -0.558622753 4.562536382  
H -5.923637104 -1.326383334 4.169379807  
C -6.004987704 0.751409329 4.758988824  
H -5.322447962 1.530768230 5.112402346  
H -6.453165116 1.087688673 3.819376742  
H -6.806499441 0.619110319 5.493261656  
C -4.604331066 -1.064947344 5.846355055  
H -5.370315450 -1.261261963 6.602784380

H -4.050291917 -1.989177852 5.661333179  
H -3.909090661 -0.315561228 6.238104493  
C -1.261995837 -2.137982359 -3.325679845  
H -1.539349121 -3.024301070 -2.761582904  
H -0.284718292 -2.201583755 -3.796894304

R2-TS<sub>RE</sub>

C -2.708568800 -1.719320900 4.512797000  
C -1.536634100 -0.938868500 4.400148400  
C -1.042710900 -0.299936200 5.547507300  
C -1.674734600 -0.434887260 6.783142000  
C -2.815549400 -1.227005100 6.893849000  
C -3.324367000 -1.859525600 5.761514700  
C -3.372472300 -2.354465700 3.334206600  
C -4.283372400 -1.588219400 2.575792800  
C -5.003348000 -2.169668200 1.522628300  
C -4.775601000 -3.506649700 1.205480800  
C -3.869367800 -4.280079400 1.926265400  
C -3.188479700 -3.708176600 3.009979200  
P -0.659567060 -0.885144700 2.772947000  
H -0.147967010 0.310859050 5.487307000  
H -1.271276200 0.073593340 7.654889000  
H -3.312848300 -1.344707100 7.852882400  
H -4.223927000 -2.464832500 5.831737500  
O -4.399408000 -0.287682980 2.964240300  
H -5.727284400 -1.596645100 0.958489060  
H -5.297637000 -3.953211500 0.366986450  
H -3.709144000 -5.312644500 1.651140200  
C -5.036379000 0.674293460 2.098896700  
H -4.902904500 0.355054530 1.061057600  
C 0.410860420 -2.434546700 2.988241700  
C 0.916549740 -3.012052500 1.652497900  
C 1.541414500 -2.269335500 4.024204700  
H -0.307612800 -3.152754300 3.402353000  
C 1.726859200 -4.302288500 1.861195300  
H 1.532861400 -2.277549500 1.121871100  
H 0.055868875 -3.215345100 1.007667800  
C 2.317577400 -3.583416500 4.219298400  
H 2.247602000 -1.497305600 3.693810700  
H 1.126111700 -1.932983800 4.981234600  
C 2.859156000 -4.112448700 2.881986100  
H 2.129186000 -4.641334000 0.898713200  
H 1.053507600 -5.099457300 2.205917400  
H 3.138068000 -3.428245000 4.931384000  
H 1.653027400 -4.333860000 4.668599600  
H 3.399827500 -5.055093300 3.034344400  
H 3.588533900 -3.392875400 2.481207100  
C 0.486889450 0.590544900 2.920599700  
C 1.563319400 0.568788770 1.812523500  
C -0.347851460 1.888043200 2.848859300  
H 1.001158400 0.557996870 3.890427000  
C 2.436103000 1.833388800 1.849339800  
H 1.080901400 0.490199690 0.835370060  
H 2.203159300 -0.312115850 1.918021400  
C 0.539630500 3.142283200 2.891435900  
H -0.912584840 1.879543500 1.906639300  
H -1.085799500 1.911030800 3.659645800  
C 1.585518800 3.108371700 1.767212000  
H 3.156447200 1.800721300 1.022843700  
H 3.021556400 1.849808800 2.781026400  
H -0.083324210 4.042164300 2.812926000  
H 1.050495500 3.197439700 3.864258000  
H 2.224139700 3.999562000 1.808543000  
H 1.070704700 3.129002000 0.795894900  
C -4.283046000 1.982056700 2.305528600  
H -3.231506800 1.848309800 2.038608600  
H -4.710788700 2.772730400 1.680005200

H -4.339529500 2.295011000 3.353297000  
 C -6.520690400 0.773395360 2.441874000  
 H -7.019159000 1.493153900 1.787692400  
 H -7.018589500 -0.194055020 2.329077000  
 H -6.643789000 1.100790000 3.479350600  
 O -2.294237100 -4.377702700 3.800189300  
 C -2.187073000 -5.813973400 3.725251700  
 H -2.057781700 -6.112371000 2.675677800  
 C -3.427252000 -6.474555500 4.328775400  
 H -3.520748100 -6.186324000 5.380990000  
 H -4.340105500 -6.174044600 3.808979700  
 H -3.341940000 -7.564918000 4.273212000  
 C -0.922317500 -6.162108400 4.498363500  
 H -0.774022700 -7.246399400 4.514785300  
 H -0.048072062 -5.698414000 4.037774600  
 H -1.001223300 -5.803306600 5.529578000  
 C -0.761100300 -0.445355420 -0.895052400  
 C 0.229597510 -1.358344800 -1.300339200  
 C -0.523641400 0.923035260 -1.129597800  
 Pd -1.915055500 -0.837503250 0.766992400  
 C 1.412185400 -0.922973040 -1.894617900  
 H 0.072430536 -2.419970000 -1.151471000  
 C 0.660988450 1.358260200 -1.733010200  
 H -1.249635000 1.665713300 -0.816249300  
 C 1.636952200 0.439664400 -2.119129700  
 H 2.163057800 -1.653706700 -2.187022000  
 H 0.818890000 2.422909500 -1.890587900  
 H 2.556164500 0.776081440 -2.590391400  
 C -2.121477400 -0.881373300 -3.707515200  
 C -2.839215800 0.466565430 -3.494188500  
 H -2.494641300 -1.389205200 -4.600236400  
 H -1.047082000 -0.721760330 -3.852557000  
 N -2.326472800 -1.818656200 -2.585399200  
 C -2.729742500 -1.326780900 -1.281012800  
 C -4.026076000 -0.546980300 -1.463560900  
 H -2.936801700 -2.213718400 -0.673069830  
 C -4.125116000 0.331817120 -2.691100000  
 H -4.897811400 -1.149758000 -1.217561200  
 C -4.205015000 0.948336800 -1.315915000  
 H -5.047140000 0.269662740 -3.264482000  
 H -2.159777200 1.151927200 -2.986317600  
 H -3.040779000 0.903975800 -4.477654500  
 C -2.129775500 -3.131104200 -2.859085000  
 C -2.687037200 -4.193617000 -1.904484500  
 O -1.633769900 -3.555026300 -3.906846300  
 C -3.891632300 -4.222433000 -1.681764500  
 O -1.758606700 -5.247550500 -1.415013600  
 C -2.296265800 -6.304264000 -0.664202150  
 C -0.373688900 -5.188183300 -1.632243500  
 C -1.462366900 -7.275019600 -0.118483126  
 H -3.372400800 -6.341541000 -0.528791800  
 C 0.460045840 -6.161795000 -1.083692300  
 H 0.041066326 -4.398741200 -2.248968000  
 C -0.079755640 -7.200499500 -0.322029320  
 H -1.884652000 -8.091660000 0.461275800  
 H 1.531622900 -6.113222000 -1.255030500  
 H 0.574223760 -7.955506000 0.106230680  
 H -3.367895600 1.541954300 -0.965293100  
 H -5.172870600 1.298578500 -0.967005000

**3c**

C -1.473838453 -1.792341196 -1.219656942  
 C -1.172630450 -3.046203602 -1.763130209  
 C -0.542461340 -1.186349309 -0.370113761  
 C 0.033653634 -3.680535266 -1.465249188  
 H -1.903067193 -3.544084504 -2.393237012  
 C 0.663754059 -1.816962377 -0.070218639

H -0.778027453 -0.225930932 0.080930854  
 C 0.955855696 -3.068435594 -0.616721954  
 H 0.243757732 -4.661104029 -1.882445405  
 H 1.368785732 -1.339091019 0.604200074  
 H 1.888830631 -3.567666932 -0.371777671  
 C -4.799474878 -2.018990430 -2.825875200  
 C -2.775598639 -1.063958238 -1.535728348  
 C -2.643411451 -0.144341804 -2.764620766  
 C -3.256874705 -0.536875266 -4.094618996  
 C -3.986749903 -1.872550612 -4.109642331  
 H -5.527065304 -1.198631003 -2.749428263  
 H -5.357230850 -2.955792435 -2.794290094  
 H -2.697638064 0.908533764 -2.504085600  
 H -3.742191132 0.261898952 -4.650841997  
 H -3.281869307 -2.708279651 -4.189669440  
 H -4.654188480 -1.939209839 -4.974685804  
 H -2.993181921 -0.412118734 -0.685711274  
 N -3.920221947 -2.012392374 -1.648763521  
 C -4.260776098 -2.822788642 -0.606872248  
 C -3.442364552 -2.725217523 0.690567762  
 O -5.217114709 -3.599979261 -0.612799068  
 O -3.449161417 -1.673100228 1.316349881  
 C -2.720418461 -3.937748199 1.157293423  
 C -1.789471940 -3.774634371 2.194651343  
 C -2.875077481 -5.196086722 0.554835365  
 C -1.015295919 -4.849977978 2.617252431  
 H -1.678205391 -2.790875506 2.637837800  
 C -2.103424573 -6.272087845 0.987548048  
 H -3.607095059 -5.327740851 -0.233135054  
 C -1.170418325 -6.100733820 2.012855939  
 H -0.286643838 -4.715598582 3.411578386  
 H -2.228725129 -7.246393161 0.524006422  
 H -0.563365281 -6.940600460 2.339999606  
 C -1.763214465 -0.474442078 -3.948123047  
 H -1.215237126 -1.412142878 -3.924398372  
 H -1.223365468 0.345116261 -4.413001718

**R2-TS<sub>prox</sub>**

C 0.298460119 -2.726953823 -6.958940453  
 C -0.320652627 -4.077732666 -6.601340747  
 H -1.344082570 -4.131009658 -7.002346658  
 H 0.249616556 -4.887984101 -7.062474223  
 N -0.379269454 -4.295341540 -5.148189112  
 C -1.068363065 -1.964705725 -4.919689907  
 C -0.996314297 -3.285661382 -4.321948639  
 H -1.889033756 -3.635431197 -3.822266079  
 Pd 0.185080075 -2.086668294 -2.890134113  
 C -0.355941371 -1.583014172 -6.176635440  
 H -1.888822092 -1.330268944 -4.602962901  
 C 0.400349389 -1.028167878 -5.002723889  
 H -0.865087874 -0.839522277 -6.786816022  
 H 1.375686664 -2.762463386 -6.756633755  
 H 0.184493808 -2.564367690 -8.035820456  
 C -0.315177315 -5.563579049 -4.660415252  
 C 0.631795736 -6.540882265 -5.378139049  
 O -0.877630968 -5.930278632 -3.629589740  
 O 0.208395740 -7.598553101 -5.814518024  
 C 2.089832568 -6.191522179 -5.398247027  
 C 2.979344771 -7.161272021 -5.887401914  
 C 2.599720962 -4.972692511 -4.914649743  
 C 4.349525500 -6.922682379 -5.889915748  
 H 2.567916568 -8.098386415 -6.249135552  
 C 3.974413548 -4.739779646 -4.912990733  
 H 1.931585074 -4.212673870 -4.527033283  
 C 4.849488844 -5.711174656 -5.401964477  
 H 5.031622377 -7.680332524 -6.265576768  
 H 4.357946666 -3.802384836 -4.520018245



H 5.920963597 -5.529291124 -5.395147568  
H 1.386008173 -1.465241791 -4.854679784  
H 0.321277852 0.029395279 -4.781658007  
C -0.600616528 -2.75917436 0.446873300  
C -1.907216847 -2.282552429 0.260688739  
C -2.672903812 -1.955535030 1.394206067  
C -2.607952644 -2.031932563 -1.041227692  
C -0.152914777 -2.992050838 1.768852486  
P 0.532773249 -3.315682110 -0.932390795  
C -2.199347012 -2.131736606 2.687639459  
H -3.668214703 -1.550888273 1.235996873  
C -2.910212900 -0.707363503 -1.430908546  
C -3.197036611 -3.085641161 -1.767657675  
C -0.925498112 -2.663619923 2.876782620  
H 0.823353134 -3.427540234 1.941542590  
C 0.342409785 -5.214542474 -0.895147768  
C 2.312641702 -3.121687927 -0.281641186  
H -0.534041750 -2.828057237 3.877001596  
H -2.821539509 -1.864443441 3.537635650  
C -3.677705813 -0.443446100 -2.573583307  
O -2.426716222 0.275622074 -0.620987678  
C -3.995160516 -2.822809552 -2.892925583  
O -2.951510708 -4.343728404 -1.304256306  
C -4.212247889 -1.508438610 -3.290980451  
H -3.881276675 0.574807968 -2.879534603  
C -3.005174758 1.596253624 -0.637328972  
H -4.823949961 -1.310846496 -4.167402264  
H -4.442926398 -3.630625832 -3.455415519  
C -3.777967623 -5.440794730 -1.764865963  
C 1.475469326 -5.912575435 -1.671608712  
C 0.2111085317 -5.844605295 0.509237459  
H -0.590627811 -5.358843522 -1.440460803  
C 3.318571103 -3.174543141 -1.460815574  
C 2.675120609 -1.896104992 0.587975636  
H 2.470930474 -4.020547383 0.331935737  
H -2.992459525 1.986665809 -1.664289408  
C -2.079804954 2.451567764 0.216790313  
C -4.433867909 1.560746685 -0.094670856  
C 1.150088235 -0.415532757 -2.052408392  
C 2.330020476 0.075432010 -2.645932780  
C 0.687681892 0.278334204 -0.919020636  
C 3.026024550 1.176597491 -2.134158441  
H 2.748941685 -0.419197230 -3.522919762  
C 1.373043550 1.385606902 -0.403189620  
H -0.200691886 -0.059650342 -0.401309078  
C 2.549298066 1.840879898 -1.002371846  
H 3.943783160 1.509577946 -2.616350019  
H 1.000622373 1.877366008 0.493664769  
H 3.088593581 2.690478637 -0.590712252  
H -1.080540099 2.481975250 -0.219914919  
H -2.467905407 3.472524643 0.289363288  
H -2.007497620 2.030410571 1.224857512  
H -4.865213991 2.567075369 -0.096634855  
H -5.077125468 0.909010547 -0.691460414  
H -4.424752102 1.189181531 0.935419072  
C 1.263474393 -7.430551362 -1.767580024  
H 2.433350449 -5.743384174 -1.163382701  
H 1.561910318 -5.486961616 -2.669376902  
C 0.081979066 -7.381822470 0.455236140  
H 1.095608207 -5.596085196 1.113474879  
H -0.655569772 -5.431899966 1.032295240  
C 1.197123567 -8.044723263 -0.364376035  
H 2.082374205 -7.874515289 -2.348391316  
H 0.337111394 -7.629658058 -2.317943858  
H 0.071062003 -7.774145895 1.480377824  
H -0.883149132 -7.645924805 0.009715814  
H 1.033069440 -9.128211007 -0.419127475  
H 2.162779868 -7.897119653 0.142608958

C 4.758432968 -3.322688904 -0.940374423  
H 3.226998701 -2.241754049 -2.024568535  
H 3.095743196 -3.983590159 -2.157228156  
C 4.099570801 -2.054818892 1.150287061  
H 2.636662587 -0.994460335 -0.023163095  
H 1.965776860 -1.743313443 1.403541857  
C 5.129757029 -2.179805952 0.017018974  
H 5.456046360 -3.355229057 -1.787634794  
H 4.857857583 -4.286636897 -0.418767517  
H 4.339423104 -1.194442913 1.787427861  
H 4.149657900 -2.946905333 1.793513766  
H 6.137720241 -2.330493402 0.424028616  
H 5.148208633 -1.235550741 -0.545208658  
H -3.796700213 -5.435726622 -2.861398185  
C -5.188407054 -5.305060497 -1.189140124  
C -3.094036721 -6.715099908 -1.301718263  
H -5.147344877 -5.374930467 -0.097273982  
H -5.649358700 -4.351108937 -1.456418398  
H -5.827540269 -6.111688514 -1.562849275  
H -3.729943939 -7.578327099 -1.523060017  
H -2.141641521 -6.844400907 -1.814716561  
H -2.928948656 -6.675308863 -0.220590351

**R3**

C -1.249527159 -0.651731500 -3.438766211  
C -2.309963301 -1.061966388 -2.609185822  
C -1.385686812 -0.735194208 -4.833031419  
C 0.062441076 -0.113902953 -2.956747467  
C -3.487624185 -1.525697500 -3.221495402  
P -2.088040567 -1.024585437 -0.769473160  
C -3.615578590 -1.598553046 -4.607060795  
H -4.328507218 -1.838416351 -2.612665531  
C -2.555558049 -1.205289282 -5.422996933  
H -4.541566655 -1.962793551 -5.044122731  
H -2.640238313 -1.256628501 -6.504926637  
H -0.553547902 -0.414190055 -5.453914430  
C 0.257504457 1.285210121 -2.897725122  
C 1.180280759 -0.960315223 -2.837349153  
C 1.551968692 1.816926764 -2.795552107  
O -0.881482210 2.019651928 -2.995223004  
C 2.638013760 0.949764504 -2.706584914  
H 1.712655863 2.887066822 -2.775682341  
C 2.470794730 -0.434134035 -2.707487948  
H 3.638450723 1.364164471 -2.617586515  
H 3.328346235 -1.090080207 -2.615050732  
O 0.905708276 -2.298449307 -2.845970604  
Pd -0.545204469 0.726540430 0.007676820  
C -1.492439837 -2.788516493 -0.481173624  
C -3.857944520 -0.917889051 -0.152380894  
C -0.894771095 3.421326887 -2.645745552  
C -1.361992734 1.004229233 1.809272018  
C -1.146304906 0.068034785 2.833017870  
C -2.224667680 2.082239312 2.053636788  
C -1.804687370 0.190328501 4.060530590  
H -0.471709868 -0.764690856 2.678379169  
C -2.898966791 2.189387016 3.276358849  
H -2.382352439 2.841163763 1.292180302  
C -2.696102513 1.242864249 4.283295424  
H -1.605256942 -0.533878283 4.845055192  
H -3.578236050 3.023427746 3.441472265  
H -3.212292176 1.333656926 5.235140054  
H -0.139710619 3.600168627 -1.871546946  
C -2.273822678 3.671610288 -2.048014118  
C -0.610744716 4.262634286 -3.887520783  
C 2.595152366 0.744873744 3.739516226  
C 1.771064782 1.784728697 2.972296327  
H 3.669571003 0.906398924 3.581048040

H 2.384122073 0.787791210 4.805073548  
 N 2.276994766 -0.599993667 3.222558823  
 C 2.433764865 -0.741785813 1.821278110  
 C 2.386463997 0.317905684 1.008499083  
 H 2.574500469 -1.760430318 1.480853698  
 C 2.024436160 1.716907792 1.449463636  
 H 2.562223058 0.159750857 -0.051890067  
 H 2.893327072 2.363153695 1.229339583  
 C 0.821313894 2.216209024 0.612234165  
 H 0.717974958 1.602030333 3.185971157  
 H 2.009920872 2.786749370 3.347172450  
 C 1.721020961 -1.635976731 3.904603013  
 C 1.474548395 -1.514800686 5.413097766  
 O 1.348099971 -2.680040816 3.356815219  
 O 0.839508128 -0.565197740 5.856877733  
 C 1.927765845 -2.639724067 6.277993594  
 C 1.599033009 -2.576135343 7.642052885  
 C 2.691690575 -3.717602454 5.800876226  
 C 2.020169817 -3.573488944 8.514152444  
 H 1.012449513 -1.732500012 7.991320827  
 C 3.115936994 -4.712232838 6.679878375  
 H 2.927697978 -3.788028957 4.745900505  
 C 2.780103362 -4.644299181 8.033499684  
 H 1.759172803 -3.520032056 9.567329257  
 H 3.703427384 -5.546128743 6.306187274  
 H 3.109578161 -5.425049983 8.713974727  
 C -0.787632551 -2.959917261 0.879063289  
 C -2.553818063 -3.880323456 -0.719683722  
 H -0.724686610 -2.891104454 -1.258929996  
 C -0.191803200 -4.369729643 1.017479019  
 H -1.493407462 -2.788309153 1.701229998  
 H 0.004170457 -2.213511767 0.989718570  
 C -1.942199065 -5.285479223 -0.570420835  
 H -3.371184928 -3.773130009 0.005527359  
 H -2.995296876 -3.769941119 -1.716969777  
 C -1.255229629 -5.455281113 0.794084798  
 H 0.275214066 -4.464060201 2.002015477  
 H 0.610570806 -4.492741351 0.273467134  
 H -2.720864333 -6.046573038 -0.709250419  
 H -1.204309810 -5.441407859 -1.370341836  
 H -0.809593738 -6.454998679 0.874228577  
 H -2.012694582 -5.385265890 1.588946936  
 C -4.014106693 -1.230912937 1.350657108  
 C -4.415946530 0.483239900 -0.487035141  
 H -4.447164959 -1.668196735 -0.695743408  
 C -5.478821568 -1.078122288 1.794322398  
 H -3.395663647 -0.552295078 1.938312429  
 H -3.664971546 -2.245347345 1.569341359  
 C -5.871821349 0.638975198 -0.018324634  
 H -3.792222025 1.231767792 0.015054600  
 H -4.340800711 0.674523775 -1.564109425  
 C -6.009376775 0.328690800 1.480281398  
 H -5.555681563 -1.285016081 2.868676999  
 H -6.102454494 -1.826140789 1.281263856  
 H -6.222766887 1.655708941 -0.235908475  
 H -6.515415005 -0.044967280 -0.592019065  
 H -7.055407805 0.425014499 1.797277353  
 H -5.428129672 1.062274246 2.056100249  
 H -2.418019083 3.024792778 -1.178171205  
 H -2.373101937 4.717291123 -1.739054743  
 H -3.054212988 3.446059624 -2.782311040  
 H -0.619285282 5.329133732 -3.638455462  
 H 0.362814984 4.017478979 -4.322131585  
 H -1.378099015 4.076594888 -4.645981835  
 C 1.837140680 -3.234870328 -3.429258874  
 H 2.804639903 -3.156173813 -2.913652128  
 C 2.008477198 -2.950866619 -4.920051870  
 C 1.237594549 -4.606708832 -3.151344745

H 1.034262931 -3.002553480 -5.416962913  
 H 2.428458382 -1.954709743 -5.086544098  
 H 2.678092699 -3.687384167 -5.375799058  
 H 1.884363790 -5.394785718 -3.549450331  
 H 1.117486462 -4.761969145 -2.075733210  
 H 0.252597702 -4.686591162 -3.622471613  
 H 0.331778401 3.062105712 1.107615101  
 H 1.186702967 2.554984975 -0.364374503

R3-TS<sub>RE</sub>

C -1.144438700 -0.660737400 -3.593646800  
 C -2.238567600 -1.036566600 -2.787961000  
 C -1.273089300 -0.702059700 -4.990967000  
 C 0.176469420 -0.196808920 -3.074214000  
 C -3.421550800 -1.453672500 -3.426629800  
 P -2.143724400 -0.963002500 -0.939967500  
 C -3.532432300 -1.501542800 -4.813184700  
 H -4.284718000 -1.733164900 -2.832769900  
 C -2.449257600 -1.119733900 -5.603999000  
 H -4.462421000 -1.827614300 -5.271260700  
 H -2.520876200 -1.142620600 -6.688168500  
 H -0.424792560 -0.394002230 -5.595849500  
 C 0.527334150 1.165940900 -3.192083800  
 C 1.137253900 -1.097027500 -2.603185000  
 C 1.813616300 1.601354700 -2.850764300  
 O -0.472213830 1.970005000 -3.640866300  
 C 2.751234000 0.674817700 -2.390561300  
 H 2.088032000 2.645230800 -2.943512400  
 C 2.426761400 -0.671610300 -2.261088400  
 H 3.748527800 1.015293000 -2.125743200  
 H 3.148981800 -1.387964200 -1.885000100  
 O 0.757171700 -2.410123600 -2.453379400  
 Pd -0.650180160 0.469792780 0.205428850  
 C -1.907450200 -2.787768800 -0.514425300  
 C -3.903884400 -0.506561500 -0.463323920  
 C -0.216242630 3.312715800 -4.090343500  
 C -0.901895000 2.472497700 0.506805960  
 C -2.036247700 2.873801700 1.242405000  
 C -0.392829870 3.344519600 -0.475100300  
 C -2.692156000 4.067414000 0.939773300  
 H -2.413376300 2.240182900 2.041016600  
 C -1.049143700 4.543018300 -0.760411100  
 H 0.509574530 3.073503000 -1.013016300  
 C -2.207738600 4.907459700 -0.067654714  
 H -3.586909300 4.342022400 1.495368100  
 H -0.649984000 5.201976300 -1.529337900  
 H -2.715320300 5.840484000 -0.297699960  
 H 0.360150430 3.848098300 -3.323420500  
 C -1.593783400 3.951017000 -4.210861000  
 C 0.544390300 3.295845300 -5.416302000  
 C 3.388834200 0.013722697 3.498974800  
 C 2.596690400 1.238612700 3.025662400  
 H 4.278712700 -0.145425900 2.878418700  
 H 3.694603000 0.109805495 4.542122000  
 N 2.543154500 -1.182125300 3.386687300  
 C 2.062671200 -1.444124700 2.081090200  
 C 1.839611400 -0.431019200 1.234878400  
 H 1.957495000 -2.488393800 1.804392600  
 C 1.885065900 1.024084900 1.645676100  
 H 1.613171200 -0.653942350 0.196525420  
 H 2.421895300 1.576544000 0.863277700  
 C 0.460439150 1.638083700 1.761643500  
 H 1.839072700 1.455775500 3.788530600  
 H 3.254552800 2.114701300 2.984175400  
 C 2.082085400 -1.831306000 4.497231500  
 C 0.998406700 -2.900188000 4.255780000  
 O 2.440711300 -1.600678900 5.645848800

O 1.308774400 -4.065811000 4.056833300  
C -0.414194640 -2.439744500 4.344170600  
C -1.437916800 -3.394963700 4.429682300  
C -0.740962700 -1.078424200 4.269035300  
C -2.769781800 -2.992104800 4.430164300  
H -1.165029200 -4.443925400 4.486394000  
C -2.074950700 -0.677100500 4.251180600  
H 0.046505682 -0.335331020 4.205908000  
C -3.089752000 -1.632964800 4.331861000  
H -3.561209700 -3.733552000 4.497195000  
H -2.322766300 0.377424030 4.168092300  
H -4.130345300 -1.320057700 4.312999000  
C -1.251651000 -2.971325400 0.869519200  
C -3.150046000 -3.683927000 -0.668608400  
H -1.168515200 -3.092062500 -1.265188500  
C -0.903706670 -4.446943000 1.121235800  
H -1.923334500 -2.618453000 1.661307600  
H -0.350686640 -2.353867500 0.937116270  
C -2.803901400 -5.158926500 -0.390390430  
H -3.930706500 -3.364027000 0.035123080  
H -3.568550300 -3.588144300 -1.676763800  
C -2.149099000 -5.335671000 0.989144600  
H -0.439384100 -4.563093000 2.106410700  
H -0.153709290 -4.768683400 0.383757230  
H -3.708166400 -5.775616600 -0.471903620  
H -2.109826000 -5.514576000 -1.165996800  
H -1.892564800 -6.388910300 1.157105300  
H -2.871218000 -5.056363000 1.771239400  
C -4.069907700 -0.531776600 1.069797500  
C -4.249388000 0.886256800 -1.037628900  
H -4.597381600 -1.245319500 -0.886929700  
C -5.469050400 -0.055131238 1.494336700  
H -3.307644100 0.115627274 1.520061700  
H -3.886279800 -1.538052800 1.460832500  
C -5.648547000 1.348397000 -0.600043800  
H -3.504615500 1.610256600 -0.687187850  
H -4.184685000 0.869642730 -2.130881000  
C -5.784009500 1.338621500 0.930082600  
H -5.542122400 -0.052180987 2.589988000  
H -6.223088300 -0.770295100 1.132968300  
H -5.843910700 2.352965600 -0.995254460  
H -6.410155300 0.684137500 -1.035908000  
H -6.790714300 1.655098300 1.230419300  
H -5.078414400 2.067757800 1.352783800  
H -2.106281300 3.924494500 -3.246472400  
H -1.504785500 4.992022000 -4.538188000  
H -2.194817000 3.402296000 -4.942963600  
H 0.729269560 4.317898800 -5.762645700  
H 1.506761800 2.785382000 -5.322601000  
H -0.049178872 2.773612000 -6.173919700  
C 1.502249700 -3.413111200 -3.183491200  
H 2.559006700 -3.361798300 -2.883663200  
C 1.385658300 -3.177749400 -4.688125600  
C 0.916155700 -4.746838000 -2.745624800  
H 0.334194870 -3.198611300 -4.990561500  
H 1.801511500 -2.203806000 -4.964056000  
H 1.931234100 -3.951723600 -5.238059500  
H 1.440971400 -5.574758000 -3.231878800  
H 1.000478600 -4.865923000 -1.662005200  
H -0.143576440 -4.796243700 -3.016646400  
H -0.107009490 1.159772500 2.566657000  
H 0.596749700 2.681665700 2.043749800

**3d**

C 0.731886677 3.780471164 -0.245713537  
C 1.808983674 4.244212515 -1.013606301  
C -0.373022523 3.234439530 -0.911003655

C 1.784875673 4.161797055 -2.405255698  
H 2.675210380 4.671138454 -0.513012011  
C -0.402486207 3.149930262 -2.304411871  
H -1.214973715 2.866638972 -0.329623672  
C 0.677800108 3.612462148 -3.056093882  
H 2.629809867 4.525911032 -2.983204854  
H -1.268637794 2.721507274 -2.801284753  
H 0.658346633 3.546254118 -4.140174211  
C 2.479821244 1.624916876 4.013792596  
C 1.809939155 2.852862978 3.394842793  
H 3.504794112 1.515096399 3.637190498  
H 2.522471876 1.682093379 5.101458806  
N 1.728798543 0.409155674 3.664251499  
C 1.266022599 0.309893776 2.335964455  
C 1.289273624 1.342065481 1.484521971  
H 0.927116409 -0.671585521 2.034852299  
C 1.729373349 2.733839279 1.863353239  
H 0.963446898 1.167675658 0.464685559  
H 2.732693819 2.908317845 1.443290132  
C 0.795025946 3.817763458 1.265157512  
H 0.797339079 2.945140182 3.807567422  
H 2.360898599 3.754342951 3.684221492  
C 1.458217918 -0.505908290 4.646292396  
C 0.685968050 -1.776556817 4.257343729  
O 1.827103270 -0.387539110 5.812601761  
O 1.175165408 -2.551571640 3.446834337  
C -0.611437052 -2.031485698 4.935200771  
C -1.339901506 -3.165039079 4.537574480  
C -1.149204368 -1.162683007 5.897597525  
C -2.589498221 -3.423425281 5.088795570  
H -0.905661197 -3.821369847 3.790510361  
C -2.402449127 -1.426355164 6.447295952  
H -0.578380863 -0.302750931 6.228370180  
C -3.123657446 -2.551963200 6.043632148  
H -3.151151295 -4.298763348 4.775803539  
H -2.815887929 -0.754855818 7.193882423  
H -4.101694019 -2.751504307 6.472620219  
H -0.209114503 3.685375903 1.685433075  
H 1.152200367 4.800550854 1.5983933426

**R3-TS**

C -1.101058585 -0.409939099 -3.138562704  
C -2.230398753 -0.633715448 -2.329590286  
C -0.923367630 -1.171035155 -4.307196760  
C -0.069746730 0.651574500 -2.938829092  
C -3.166644362 -1.592094235 -2.766840657  
P -2.447701974 0.171446784 -0.666906445  
C -2.990050698 -2.325574257 -3.936500788  
H -4.060000753 -1.780108035 -2.184158024  
C -1.847865821 -2.127477220 -4.710464574  
H -3.741127313 -3.052388490 -4.233687190  
H -1.685940250 -2.697801433 -5.620963182  
H -0.039980670 -0.979532616 -4.910367049  
C -0.276022355 1.904977838 -3.542062803  
C 1.188009295 0.352017171 -2.395207550  
C 0.758255679 2.847565631 -3.604550838  
O -1.525515439 2.088494247 -4.053027488  
C 2.014890490 2.498219212 -3.113561001  
H 0.596777644 3.819202866 -4.055637250  
C 2.248421048 1.260071164 -2.515846942  
H 2.831882073 3.210762576 -3.191665667  
H 3.232802581 1.015925784 -2.135762659  
O 1.264478886 -0.844004335 -1.737981645  
Pd -1.413526033 2.226157297 -0.061406929  
C -1.730559415 -1.198681344 0.423988857  
C -4.313988382 0.126606900 -0.444378380  
C -1.780560655 3.049797283 -5.096689512

C -2.953906068 3.573280306 -0.471091000  
C -3.831583000 4.059922503 0.515443750  
C -3.129608842 4.072354040 -1.774519497  
C -4.868578950 4.949669536 0.209234229  
H -3.719921292 3.733468375 1.548648868  
C -4.158157037 4.967636181 -2.089662020  
H -2.467142806 3.729100326 -2.561412295  
C -5.045015105 5.401254267 -1.100530533  
H -5.538818462 5.291109771 0.996408458  
H -4.272123126 5.323929715 -3.112420667  
H -5.851933062 6.088051780 -1.343632506  
H -1.491463879 4.051163764 -4.745297825  
C -3.290360305 3.001295263 -5.300938643  
C -1.012097183 2.688504834 -6.367125797  
C 2.513493642 1.351309083 0.691422699  
C 1.897701275 2.737397514 0.573180559  
H 1.968296887 0.650904886 0.059362860  
H 3.560239425 1.347787460 0.381738848  
N 2.455489688 0.835184006 2.077929996  
C 1.466444204 1.322915624 2.947703486  
C 0.529017603 2.205960975 2.565124595  
H 1.479705227 0.909794638 3.946249217  
C 0.520230828 2.792461950 1.210105751  
H -0.235877331 2.504505033 3.274139819  
H -0.043072653 1.415157347 0.373505705  
C -0.372578341 3.853353665 0.892647339  
H 2.522462211 3.474224139 1.096218624  
H 1.853994391 3.013876016 -0.480837978  
C 3.276071996 -0.225751916 2.348988149  
C 3.198914017 -0.887926343 3.730898390  
O 4.049417792 -0.700546905 1.515260090  
2.140788979 -1.381440651 4.099388852  
C 4.438042206 -0.947792019 4.545121581  
C 4.337147615 -1.508284872 5.829644214  
C 5.664681210 -0.422244584 4.109741567  
C 5.443282845 -1.536190376 6.670339996  
H 3.378182318 -1.906677354 6.145295737  
C 6.771048065 -0.454269431 4.956469190  
H 5.754841898 -0.014068862 3.109645680  
C 6.661753553 -1.004632310 6.235385910  
H 5.359237576 -1.965497177 7.664703567  
H 7.720506368 -0.049356122 4.618522690  
H 7.526079575 -1.022240104 6.893782011  
C -1.539528183 -0.782502008 1.897770523  
C -2.439288864 -2.565216055 0.352605652  
H -0.730412515 -1.303627768 -0.021780968  
C -0.737980104 -1.843492419 2.668009081  
H -2.517692839 -0.660279406 2.379627164  
H -1.032729422 0.183227225 1.958132487  
C -1.646026793 -3.634042587 1.128517106  
H -3.445728578 -2.478291264 0.787220921  
H -2.561867178 -2.889047069 -0.684705152  
C -1.411707651 -3.220438531 2.588768703  
H -0.609889623 -1.534262810 3.7111084529  
H 0.276935763 -1.905476793 2.254378767  
H -2.173035728 -4.595458112 1.079014447  
H -0.675220311 -3.781165459 0.633557969  
H -0.806692619 -3.973805367 3.108132314  
H -2.380219133 -3.179374789 3.109549086  
C -4.736393986 0.592502884 0.964392055  
C -5.014304909 0.961783572 -1.540404032  
H -4.632054087 -0.920054751 -0.543116860  
C -6.268255497 0.596606769 1.116083108  
H -4.349523788 1.600186332 1.139099802  
H -4.299788980 -0.060193693 1.726549315  
C -6.541404475 0.943391915 -1.368534888  
H -4.660333565 1.994272706 -1.481143301  
H -4.742846068 0.592245081 -2.534921328

C -6.944211393 1.442082219 0.026750587  
H -6.535370072 0.967167128 2.113711955  
H -6.641630965 -0.437088664 1.055495975  
H -7.003803088 1.563325533 -2.146362314  
H -6.918877116 -0.080740400 -1.513609844  
H -8.034794430 1.415855651 0.145650133  
H -6.630742088 2.489551645 0.134231456  
H -3.814418451 3.216765474 -4.367541890  
H -3.595411167 3.731254534 -6.057197715  
H -3.584739566 2.001851639 -5.636871218  
H -1.248946691 3.398271464 -7.166314918  
H 0.068553845 2.701537164 -6.205196679  
H -1.299775638 1.684001137 -6.693940297  
C 2.530662516 -1.518140609 -1.540079708  
H 3.242674718 -0.838319139 -1.056914347  
C 3.077682503 -2.005340209 -2.878463043  
C 2.220597985 -2.646254212 -0.567361544  
H 2.358717607 -2.684131386 -3.348620116  
H 3.258271092 -1.167960086 -3.559056791  
H 4.022396628 -2.538685313 -2.731667202  
H 3.128929328 -3.210663332 -0.339271740  
H 1.827445460 -2.242298721 0.369028881  
H 1.474861811 -3.322747415 -0.997666003  
H -1.041823631 4.236366254 1.658031635  
H -0.090612687 4.562796344 0.118741099

R4

C -1.329838834 -0.458706643 -3.589592202  
C -2.208513661 -0.805404833 -2.542679584  
C -1.403685264 -1.155585415 -4.807598954  
C -0.355196467 0.672674437 -3.575967912  
C -3.169492902 -1.804793485 -2.797568361  
P -2.142539179 -0.060829924 -0.842417285  
C -3.239114910 -2.477661053 -4.013517580  
H -3.894355244 -2.062882925 -2.035318898  
C -2.335632842 -2.163385230 -5.027178933  
H -3.997767160 -3.240987540 -4.163525325  
H -2.368646753 -2.681332372 -5.981653095  
H -0.714864693 -0.871703740 -5.598181634  
C -0.779344697 1.941585476 -4.003768662  
C 1.005085708 0.456004788 -3.300960348  
C 0.140157806 2.989699860 -4.151518354  
O -2.121607135 2.050303410 -4.223252767  
C 1.484270436 2.745140898 -3.882390749  
H -0.181437507 3.972204135 -4.473892652  
C 1.933946166 1.493396532 -3.460938964  
H 2.204447486 3.549359050 -4.009493856  
H 2.988360913 1.338257991 -3.270481053  
O 1.301421426 -0.805360790 -2.879944676  
Pd -0.783381735 1.784595128 -0.532060832  
C -1.431371364 -1.481187521 0.180558702  
C -3.962471636 0.084044022 -0.398709880  
C -2.668241029 3.122183512 -5.015103637  
C -2.236135226 3.312007182 -0.304211674  
C -2.718867620 3.745390396 0.945319970  
C -2.726507787 3.998513391 -1.431671497  
C -3.669395097 4.768220552 1.062912211  
H -2.363200411 3.265626374 1.857502209  
C -3.675962254 5.020814552 -1.330021408  
H -2.374921148 3.705569063 -2.415283750  
C -4.164143785 5.405059431 -0.077567462  
H -4.028744445 5.063968590 2.047335136  
H -4.042217655 5.513558567 -2.229869069  
H -4.908057071 6.193159448 0.008558635  
H -2.291724028 4.084298195 -4.640411010  
C -4.171954569 3.056259027 -4.776083302  
C -2.287335157 2.940155743 -6.483175969



H -1.015394359 -4.385206987 0.638703320  
H -0.703607298 -4.288559867 3.102863027  
H -2.008490218 -3.112702526 3.246102895  
C -4.108613029 0.558248510 0.957868327  
C -4.508937534 0.988522296 -1.529040148  
H -4.370708715 -0.942331408 -0.566647485  
C -5.591434669 0.866210280 1.228839851  
H -3.524208254 1.472421498 1.095483108  
H -3.744445923 -0.174760698 1.686865886  
C -5.984468741 1.288735409 -1.225329532  
H -3.946700325 1.926166714 -1.525605634  
H -4.404269662 0.559576494 -2.530384432  
C -6.154503165 1.850772737 0.193408166  
H -5.698686834 1.269849817 2.243102544  
H -6.174175861 -0.066922698 1.197268851  
H -6.371117304 1.996294782 -1.969408978  
H -6.580287167 0.368894419 -1.326793327  
H -7.211545423 2.056778043 0.400659413  
H -5.615337275 2.805135913 0.271798748  
H -4.617345811 3.049126909 -3.653632137  
H -4.972274970 3.730250276 -5.258444360  
H -4.773426415 1.973308685 -5.058516173  
H -3.034419416 3.826299434 -7.030882081  
H -1.483703488 3.066651119 -6.619950712  
H -2.918054009 2.056234131 -6.890569323  
C 2.582749919 -0.832516736 -2.321031576  
H 2.814199428 0.049816354 -1.710276416  
C 3.662413935 -1.057527246 -3.379388204  
C 2.399936170 -2.032524867 -1.398863843  
H 3.426745548 -1.952419340 -3.964585792  
H 3.727958643 -0.210883895 -4.068112922  
H 4.641425028 -1.197398088 -2.908776988  
H 3.342610919 -2.280629547 -0.900125117  
H 1.647507829 -1.806248888 -0.638842618  
H 2.068716884 -2.903669942 -1.973608963

**R5'**

C -1.284778272 -0.498060338 -3.579413603  
C -2.098853454 -1.026973822 -2.560928036  
C -1.405179266 -1.012077410 -4.880013297  
C -0.268635507 0.596651426 -3.391996590  
C -3.020951227 -2.039659840 -2.877115042  
P -1.944453465 -0.306287068 -0.875147890  
C -3.129959370 -2.541665354 -4.171774700  
H -3.679654489 -2.428816523 -2.107740620  
C -2.313222209 -2.023905345 -5.178386099  
H -3.851165508 -3.323144507 -4.394132945  
H -2.388569629 -2.400967103 -6.194807005  
H -0.776996781 -0.597409612 -5.663513517  
C -0.515353910 1.877403079 -3.957201910  
C 1.064046485 0.271328519 -3.021316908  
C 0.536090692 2.775894368 -4.184260577  
O -1.815451690 2.120341690 -4.266433964  
C 1.826206408 2.410325797 -3.825068881  
H 0.352844430 3.763282713 -4.584184495  
C 2.108480652 1.176758519 -3.240323405  
H 2.633458676 3.120151679 -3.975100235  
H 3.125779314 0.939132268 -2.959431869  
O 1.212452673 -0.967296558 -2.473714203  
Pd -0.691930323 1.698820851 -1.003939599  
C -1.300955635 -1.725148453 0.174448110  
C -3.730698548 0.004011132 -0.408367845  
C -2.237347646 3.451523225 -4.640289982  
C 0.129048563 3.562039032 -1.066696331  
C 1.506306064 3.788059286 -0.902998607  
C -0.660603681 4.648251611 -1.488851722  
C 2.080332008 5.028090284 -1.206106348

H 2.148328312 2.980709033 -0.558806910  
C -0.090597860 5.886206664 -1.803396012  
H -1.736783304 4.523762224 -1.592512335  
C 1.287037289 6.079895357 -1.669138566  
H 3.151913586 5.173354309 -1.079519726  
H -0.723172266 6.703633899 -2.145529045  
H 1.732871355 7.042907041 -1.905660828  
H -1.640582521 4.180168937 -4.079649843  
C -3.690841603 3.558402840 -4.197213066  
C -2.061594856 3.644308302 -6.145442685  
H -1.013819341 2.230073786 0.403002357  
C -0.606981881 -1.187110242 1.446600713  
C -2.310901259 -2.839864423 0.509764918  
H -0.523993729 -2.151544169 -0.474083447  
C 0.023835411 -2.321418965 2.271371584  
H -1.337146742 -0.656040205 2.070709313  
H 0.146964000 -0.443702667 1.164907959  
C -1.650498466 -3.962753016 1.329280832  
H -3.146842355 -2.422868361 1.086996074  
H -2.733927165 -3.259587253 -0.408048169  
C -1.001683320 -3.413958076 2.607924626  
H 0.466051519 -1.911273819 3.187388770  
H 0.847964528 -2.773076174 1.700852092  
H -2.393276383 -4.732711999 1.572150356  
H -0.880883329 -4.450550992 0.713288314  
H -0.526822163 -4.224454625 3.174068286  
H -1.783084814 -2.991272034 3.256394388  
C -3.873073204 0.498698731 1.045205625  
C -4.318198296 1.043573768 -1.389135899  
H -4.289927214 -0.936149331 -0.514015784  
C -5.337265476 0.834731400 1.378337723  
H -3.247786432 1.391689562 1.175913096  
H -3.500523841 -0.253821534 1.748895856  
C -5.779124205 1.377374840 -1.053136115  
H -3.710004409 1.955960227 -1.323150435  
H -4.233859090 0.687292821 -2.421131344  
C -5.918099499 1.863992023 0.397084173  
H -5.406590297 1.205247426 2.408352773  
H -5.938401991 -0.085664023 1.334034143  
H -6.154756045 2.135923891 -1.751342552  
H -6.400597878 0.481402580 -1.198528256  
H -6.969056614 2.068608377 0.635479885  
H -5.376168676 2.813890534 0.510475995  
H -3.767811142 3.436726362 -3.114045374  
H -4.100717904 4.535674830 -4.472147563  
H -4.292557726 2.779283127 -4.676613119  
H -2.373969343 4.651209036 -6.442067865  
H -1.019385870 3.505157913 -6.445348262  
H -2.673491115 2.916162463 -6.687845446  
C 2.524125059 -1.457391106 -2.130776337  
H 3.097708270 -0.648818270 -1.659392132  
C 3.236011849 -1.958725358 -3.386339772  
C 2.295951880 -2.555152216 -1.101009220  
H 2.662712917 -2.777230753 -3.833314531  
H 3.334061792 -1.163420757 -4.129982089  
H 4.237349926 -2.326923436 -3.139740670  
H 3.248446330 -3.009699414 -0.811085298  
H 1.820053575 -2.143985815 -0.207853259  
H 1.648356075 -3.334812494 -1.515053066

**R5'-TS**

C -1.220738196 -0.628184242 -3.578163849  
C -2.149998950 -0.968711575 -2.575009541  
C -1.305005940 -1.255158582 -4.829158476  
C -0.119222323 0.372063470 -3.398064083  
C -3.140909706 -1.922010218 -2.864768993  
P -2.025556384 -0.132180834 -0.935252706

C -3.216299035 -2.537117603 -4.112985968  
H -3.876245381 -2.182823481 -2.110379935  
C -2.290344472 -2.2011015964 -5.100950347  
H -3.994481145 -3.268779714 -4.312255496  
H -2.337857093 -2.668538133 -6.080879809  
H -0.584722620 -0.983654693 -5.595996259  
C -0.273139517 1.693895150 -3.878805712  
C 1.151267204 -0.042412606 -2.946202719  
C 0.827628112 2.564318329 -3.935951242  
O -1.532585890 2.007898165 -4.288001262  
C 2.063337567 2.121123887 -3.480831479  
H 0.716946318 3.583194982 -4.282079856  
C 2.242472526 0.832408984 -2.979153094  
H 2.905650649 2.805936601 -3.499719745  
H 3.217237874 0.522828593 -2.624311862  
O 1.200252872 -1.327300998 -2.480546523  
Pd -0.933873129 1.965350013 -1.037523564  
C -1.182536454 -1.445387333 0.111168485  
C -3.811059510 -0.016436250 -0.386398280  
C -1.881175790 3.377376454 -4.587601635  
C -0.154588966 3.856440244 -0.952527500  
C 1.221256323 4.022809145 -0.717265410  
C -0.875318470 4.950591540 -1.464277838  
C 1.868128486 5.214269170 -1.057266586  
H 1.798652986 3.205582188 -0.293031523  
C -0.228263723 6.141430587 -1.809636819  
H -1.949388725 4.865665472 -1.611399831  
C 1.148847820 6.274613706 -1.615171425  
H 2.937793860 5.316501721 -0.885197758  
H -0.801335091 6.968550810 -2.224141755  
H 1.652309794 7.202054688 -1.876250062  
H -1.302399948 4.041807445 -3.936477331  
C -3.356124230 3.508067926 -4.231236164  
C -1.591373084 3.670697909 -6.057927355  
H -1.126981992 2.883888407 0.203845419  
C -0.558995412 -0.847219958 1.390861065  
C -2.029672153 -2.692100583 0.424162889  
H -0.357327247 -1.746760068 -0.548256736  
C 0.249316459 -1.904752764 2.160360589  
H -1.348129543 -0.4571105053 2.045999395  
H 0.071874937 0.008589104 1.126974780  
C -1.205986482 -3.740190488 1.193441535  
H -2.898949338 -2.405875582 1.032532488  
H -2.416430060 -3.130931725 -0.502005453  
C -0.599820813 -3.146424569 2.474152315  
H 0.647908115 -1.468933783 3.084717069  
H 1.118904175 -2.204720343 1.557590318  
H -1.833251111 -4.608327615 1.431551361  
H -0.397325341 -4.105460802 0.544111129  
H 0.001080497 -3.900197704 2.997575901  
H -1.413174684 -2.861907901 3.157842766  
C -3.926343035 0.507275269 1.059719866  
C -4.569332834 0.912323007 -1.360076841  
H -4.264630357 -1.016041824 -0.423578814  
C -5.396814805 0.695931793 1.470160036  
H -3.392219823 1.464100899 1.133409384  
H -3.438673561 -0.182132692 1.757126815  
C -6.036788935 1.093520020 -0.945034411  
H -4.067035052 1.889491542 -1.359923658  
H -4.506095733 0.527121785 -2.383379609  
C -6.143085850 1.617236425 0.494424763  
H -5.447400839 1.095814696 2.490314214  
H -5.894594574 -0.284917624 1.492266777  
H -6.537459636 1.777506356 -1.641512050  
H -6.559716149 0.128750622 -1.021657023  
H -7.194414556 1.717314335 0.791106693  
H -5.703370785 2.623931795 0.543103978  
H -3.502545930 3.296858369 -3.168779235

H -3.711605007 4.521692662 -4.444040441  
H -3.953941663 2.797878430 -4.811908385  
H -1.850034100 4.706877396 -6.30040764  
H -0.534081208 3.516075702 -6.291097849  
H -2.182859208 3.005562725 -6.695623832  
C 2.464749805 -1.990059117 -2.289523074  
H 3.120526684 -1.352872640 -1.680128767  
C 3.116943337 -2.289590696 -3.638796991  
C 2.139730821 -3.256260552 -1.507718258  
H 2.457480960 -2.933393830 -4.229739179  
H 3.300038389 -1.373163855 -4.205212181  
H 4.072695698 -2.803992902 -3.495799646  
H 3.047835630 -3.842555829 -1.336930168  
H 1.696669507 -3.010754741 -0.539344002  
H 1.426063446 -3.868450929 -2.068281872

**A1**

Pd 0.634970100 0.889712300 -0.667164300  
C 2.044223800 2.008650500 -1.563784000  
C 3.383354700 1.613453500 -1.397926100  
C 1.760203200 2.980715500 -2.536693600  
C 4.401044400 2.162573600 -2.184857800  
H 3.639943100 0.859454200 -0.657426000  
C 2.777639600 3.529387700 -3.325294500  
H 0.738393660 3.312599200 -2.694623700  
C 4.103038000 3.125217000 -3.151111400  
H 5.429050400 1.837323000 -2.038507500  
H 2.531705900 4.277225500 -4.076658700  
H 4.893669600 3.556640100 -3.759494000  
C -0.775082200 -4.977570500 0.854163700  
C -1.274068700 -2.914172200 -0.606556100  
C -1.386206300 -3.793586000 -1.833591500  
C -1.087450300 -5.292372700 -1.693170900  
C -0.536159750 -5.876064000 -0.380475850  
H -1.798420500 -5.107625000 1.232125200  
H -0.080273560 -5.220748400 1.663193500  
H -2.221452000 -3.542273000 -2.483251300  
H -1.752395600 -5.953793500 -2.243188900  
H 0.542939070 -6.039307000 -0.485263560  
H -0.984818000 -6.858737000 -0.197020470  
H -2.262677700 -2.543561500 -0.309832480  
N -0.586905540 -3.592985000 0.495734630  
C 0.414982000 -2.681143300 0.666095200  
C -0.208041500 -1.734057400 -0.437113460  
O 1.391204800 -2.681744300 1.401886700  
O -0.758984450 -0.555709360 -0.009260545  
C 0.730552500 -1.471360200 -1.619047400  
C 0.207470950 -0.783103940 -2.735922600  
C 2.087683200 -1.847636100 -1.633893400  
C 1.014665800 -0.507883800 -3.846418000  
H -0.846247200 -0.518052600 -2.739707500  
C 2.883916100 -1.563313700 -2.740106000  
H 2.504775800 -2.349501800 -0.767106950  
C 2.350870100 -0.897126560 -3.848513800  
H 0.596255600 0.019462686 -4.698876000  
H 3.931736500 -1.850905200 -2.735505300  
H 2.983316200 -0.667931140 -4.701087000  
C -0.191187380 -4.405148500 -2.519448800  
H 0.793912700 -4.193484000 -2.114167200  
H -0.212778780 -4.480834500 -3.602933000  
C 0.223711150 -0.816992940 3.650112900  
C -0.731321330 -0.542178900 4.654545300  
C 0.438750620 0.072014034 2.610430500  
H 0.771995500 -1.749192700 3.625815400  
C -1.385596800 0.712711600 4.599807300  
N -1.025009200 -1.471948900 5.631551300  
C -1.149643000 1.595050700 3.551798300

H -2.095781000 1.000473500 5.365861400  
 C -0.253065100 1.290610100 2.513904000  
 H -1.689490800 2.535121200 3.555533400  
 P 0.028969040 2.337584500 1.042584200  
 H 1.140973900 -0.222678590 1.841041200  
 C -1.886942600 -1.102699000 6.747788400  
 C -0.251066770 -2.706730800 5.704596500  
 H -2.890023200 -0.792300700 6.396747000  
 H -2.018172500 -1.973338700 7.396228000  
 H -1.470277700 -0.274227680 7.358906700  
 H 0.822887900 -2.531717000 5.918208000  
 H -0.663488860 -3.334802400 6.499391000  
 H -0.315028520 -3.272576800 4.757807700  
 C -1.651965400 3.095097500 0.509108070  
 C 1.258927500 3.665937200 1.647112500  
 C -1.517117300 3.564200600 -0.956544500  
 C -2.702913800 1.962229400 0.561374400  
 C -2.137586000 4.290884500 1.351386400  
 C 0.838244900 4.278455300 3.000106000  
 C 2.601640500 2.932388300 1.851635300  
 C 1.440438400 4.782680500 0.604051200  
 H 1.618181600 4.981876000 3.317394700  
 H -0.097859510 4.836199800 2.945295300  
 H 0.741613600 3.516744000 3.777308500  
 H 3.329302300 3.636428600 2.273710500  
 H 3.000900000 2.556733600 0.909140400  
 H 2.502573000 2.095732700 2.550401700  
 H 1.731086700 4.387168400 -0.370678450  
 H 0.536165360 5.386420700 0.483170600  
 H 2.237017900 5.457042700 0.942223700  
 H -2.466477200 4.012116400 -1.275896500  
 H -0.733228150 4.314186600 -1.089189600  
 H -1.300224900 2.722339400 -1.620156400  
 H -3.618382500 2.316615800 0.070221020  
 H -2.955749800 1.687628400 1.587927200  
 H -2.356904500 1.056337700 0.055840176  
 H -2.244578100 4.053128000 2.411541500  
 H -1.481502700 5.159903000 1.257848100  
 H -3.128502600 4.590411000 0.987030270

**A1-TS<sub>dis</sub>**

C -0.739255755 2.322722778 -3.642190804  
 C 0.614930729 2.502621092 -3.983163087  
 C -1.617197709 3.394130620 -3.844002320  
 C 1.073944679 3.713963985 -4.508240291  
 H 1.324402616 1.686730725 -3.856982381  
 C -1.158232146 4.606534370 -4.371066731  
 H -2.666569858 3.298270873 -3.591024970  
 C 0.187406488 4.775579315 -4.701454943  
 H 2.125293672 3.825566275 -4.765778407  
 H -1.860655020 5.423554644 -4.522487244  
 H 0.541080682 5.719988693 -5.106675541  
 C -5.195406279 2.918979413 -2.078188305  
 C -5.477396722 3.871364331 -1.071322763  
 C -4.085229365 2.091941412 -1.987733503  
 H -5.825897077 2.836364514 -2.954667424  
 C -4.604587536 3.906900700 0.041798759  
 N -6.556681011 4.731442743 -1.174055331  
 C -3.197784400 2.148110770 -0.899360351  
 H -3.882413786 1.402346664 -2.803457910  
 C -3.506653271 3.059078607 0.122541461  
 H -4.774818241 4.605093065 0.852040225  
 C -6.661734812 5.848276954 -0.249150792  
 C -7.279758236 4.809715500 -2.434210426  
 H -2.879479726 3.128160321 1.004191408  
 P -1.766692696 1.011637958 -0.907152580  
 C -0.300253575 1.817794567 0.029350009

C -2.436975562 -0.530697025 0.021366515  
 H -5.789890680 6.519217548 -0.295141991  
 H -7.553873719 6.429627478 -0.486925346  
 H -6.765160144 5.496280314 0.783777430  
 H -7.734702410 3.845395824 -2.687146548  
 H -8.087140121 5.537706885 -2.340981041  
 H -6.635691663 5.113279098 -3.273983235  
 C 0.982376471 1.080120180 -0.420720424  
 C -0.178946405 3.296710537 -0.397778981  
 C -0.391279827 1.747391092 1.566695357  
 C -3.113448302 -0.172466553 1.360291384  
 C -3.509570089 -1.167164182 -0.893678208  
 C -1.301854308 -1.549066787 0.241529945  
 H 1.839376598 1.492824255 0.126165204  
 H 0.943568162 0.006681324 -0.220615633  
 H 1.161969879 1.220931625 -1.488620829  
 H 0.744465586 3.704099309 0.032663002  
 H -1.010566092 3.905836558 -0.038080075  
 H -0.122037314 3.406065590 -1.480645437  
 H -1.294414842 2.217665703 1.963139919  
 H -0.347195897 0.721775041 1.939216711  
 H 0.466822462 2.284377691 1.989891407  
 H -3.556632413 -1.085276206 1.777747290  
 H -2.419420767 0.218263652 2.104771982  
 H -3.920673529 0.552723590 1.224659523  
 H -3.939206366 -2.030066883 -0.369154005  
 H -3.081016241 -1.520967762 -1.832839758  
 H -4.328525389 -0.472058248 -1.102071156  
 H -0.806470653 -1.799463466 -0.699254767  
 H -0.558476445 -1.193870709 0.961360613  
 H -1.731666692 -2.472037267 0.650851159  
 C 0.578007051 -1.786999793 -4.688639095  
 C 1.211116513 -2.954870157 -5.431195114  
 C 1.873673637 -2.722550825 -6.794691237  
 C 1.731191101 -1.363657313 -7.492361511  
 C 1.469401578 -0.212782073 -6.505030482  
 H 2.391186088 0.047151426 -5.966215446  
 H 1.105595100 0.683967098 -7.012128148  
 H 1.740520712 -3.632417353 -4.765529571  
 H 2.826877803 -3.224035646 -6.944321700  
 H 0.902887271 -1.399011378 -8.209219910  
 H 2.637201661 -1.141905195 -8.067143557  
 H 1.174099133 -1.589096620 -3.786694699  
 N 0.472528514 -0.596606583 -5.524295426  
 C -0.831212623 -0.217979991 -5.421763344  
 Pd -1.184859667 0.432952085 -3.075021521  
 C -0.936865219 -1.825380280 -4.250462396  
 O -1.486994487 0.500129562 -6.147983529  
 O -1.181570612 -1.707464548 -2.964776402  
 C -1.869804195 -2.799165347 -4.943416677  
 C -2.667365332 -2.504144430 -6.053092731  
 C -1.930413774 -4.085904546 -4.384793692  
 C -3.486162165 -3.490040158 -6.611680320  
 H -2.657378496 -1.507415492 -6.478070621  
 C -2.738532287 -5.068869542 -4.949028634  
 H -1.332917790 -4.303185387 -3.504596374  
 C -3.518430156 -4.774242456 -6.070755883  
 H -4.102301235 -3.246742379 -7.473429796  
 H -2.763607490 -6.064382397 -4.512968599  
 H -4.151592906 -5.539126075 -6.512587375  
 C 0.650862353 -3.593583530 -6.675498541  
 H -0.273915145 -3.200486518 -7.085002718  
 H 0.747985824 -4.671574944 -6.766369453

**A2<sub>dis</sub>**

Pd -1.823817800 -0.121326160 -3.155177400  
 C -1.431525000 1.755854200 -3.872622000



C -0.165631010 2.317612200 -3.660966200  
C -2.433512700 2.520885000 -4.480751000  
C 0.074105390 3.651317400 -4.013606000  
H 0.635167900 1.730256900 -3.221323500  
C -2.187760800 3.853772200 -4.822679500  
H -3.394859300 2.076491800 -4.710786300  
C -0.936147000 4.425772000 -4.585392000  
H 1.057758600 4.080819600 -3.835339500  
H -2.978323000 4.441761000 -5.284642700  
H -0.746592700 5.461744000 -4.854973000  
C -0.718187300 -0.714558900 -7.319345500  
C 0.568744300 -0.673512940 -5.206330000  
C 1.631665300 -1.530211600 -5.901621300  
C 1.386895800 -2.116103400 -7.282033000  
C 0.012429155 -1.913931500 -7.923548700  
H -0.215708400 0.220226440 -7.614492400  
H -1.755916700 -0.663789150 -7.650365400  
H 2.632455300 -1.162072300 -5.692602000  
H 2.234130600 -2.091269500 -7.963262000  
H -0.604677700 -2.811986400 -7.797257000  
H 0.121957034 -1.754933800 -9.002194000  
H 0.901628300 0.371737600 -5.262031600  
N -0.735139400 -0.790907600 -5.851991000  
C -1.871731900 -0.402706030 -5.172981000  
C 0.619863300 -1.010555500 -3.702603000  
O -2.970047200 -0.329294400 -5.712331300  
O 1.429561100 -0.370935800 -3.025900100  
C -0.001642417 -2.258863200 -3.109555000  
C -0.993159230 -3.057860000 -3.716647900  
C 0.508165060 -2.664979000 -1.861163700  
C -1.458790200 -4.212602600 -3.083518500  
H -1.389205600 -2.791634800 -4.687323600  
C 0.057992373 -3.828497600 -1.247221400  
H 1.272172300 -2.047809000 -1.401877600  
C -0.934703700 -4.605322000 -1.852250800  
H -2.228267700 -4.809347600 -3.565590100  
H 0.473441450 -4.127211600 -0.288486420  
H -1.295733900 -5.507973000 -1.366791600  
C 1.508275000 -3.023263000 -6.082546700  
H 0.600413400 -3.511700600 -5.743403400  
H 2.406656500 -3.621016300 -5.956223000  
C -5.889050500 2.232739000 -2.724096000  
C -6.385353600 3.188833200 -1.809229400  
C -4.803611300 1.428264400 -2.401765300  
H -6.327458400 2.129053400 -3.709055700  
C -5.755436000 3.251378800 -0.544069200  
N -7.438298000 4.028115300 -2.137972400  
C -4.153857700 1.507652200 -1.157624800  
H -4.437343000 0.734102670 -3.154268000  
C -4.682242000 2.424772000 -0.233699550  
H -6.096365500 3.954782000 0.206103370  
C -7.753159000 5.145461600 -1.263147500  
C -7.887218000 4.087857000 -3.519960900  
H -4.248236700 2.516034600 0.755303140  
P -2.698644900 0.422155980 -0.874946950  
C -1.463686200 1.348280100 0.254679980  
C -3.475932800 -1.078890600 0.031355426  
H -6.906511300 5.838857700 -1.137358400  
H -8.592824000 5.704175000 -1.680544900  
H -8.054583000 4.795612000 -0.268827200  
H -8.266102000 3.114878200 -3.853932900  
H -8.706996000 4.803885000 -3.601777800  
H -7.088340800 4.396636500 -4.212235000  
C -0.101202470 0.633692500 0.090479510  
C -1.321341500 2.787897800 -0.287995000  
C -1.816403700 1.408106200 1.753399600  
C -4.493852600 -0.691896200 1.120066600  
C -4.212712300 -1.874224400 -1.070879600

C -2.380570400 -1.980206300 0.626051700  
H 0.657351100 1.172957800 0.672322500  
H -0.124164380 -0.396277870 0.457531000  
H 0.229337130 0.608722900 -0.951230300  
H -0.493897770 3.281893000 0.237947420  
H -2.222814300 3.383834000 -0.128167540  
H -1.092684600 2.801694400 -1.355056900  
H -2.770595600 1.904807400 1.945867500  
H -1.850416300 0.419030900 2.216063000  
H -1.041951500 1.984481800 2.276149000  
H -4.921334000 -1.605683700 1.553703400  
H -4.040986500 -0.124418350 1.936354800  
H -5.316856000 -0.099816850 0.710780100  
H -4.724506400 -2.734193000 -0.619666040  
H -3.517693800 -2.261786500 -1.824561600  
H -4.968164400 -1.265552200 -1.577892100  
H -1.620927900 -2.234723000 -0.115555115  
H -1.885301600 -1.525091900 1.487928400  
H -2.832298500 -2.920092600 0.969861000

A2-TS<sub>dis</sub>

Pd -1.252964383 0.329952825 -3.452232779  
C -0.236730394 2.110296752 -4.111179956  
C 1.000954125 2.230005295 -3.445172949  
C -0.932619597 3.283055220 -4.452785230  
C 1.501752351 3.492474962 -3.113533781  
H 1.557185643 1.354132801 -3.131830277  
C -0.421569702 4.537396484 -4.124904277  
H -1.868123619 3.191261815 -4.994436251  
C 0.796491110 4.648059788 -3.449717699  
H 2.445931105 3.564922766 -2.578894311  
H -0.976434616 5.431220724 -4.399989362  
H 1.194349998 5.626548692 -3.193743235  
C 0.500712195 0.587329408 -7.509987921  
C 1.437880003 -0.272650628 -5.377301547  
C 2.398323016 -1.117858961 -6.227809479  
C 2.228744407 -1.233722497 -7.731842355  
C 0.993015606 -0.584900948 -8.355177414  
H 1.248936795 1.397415066 -7.524373960  
H -0.441693332 0.982799685 -7.887597363  
H 3.415383955 -1.034494977 -5.855199611  
H 3.142321191 -1.172831550 -8.318622780  
H 0.183078150 -1.316613716 -8.460509826  
H 1.226707800 -0.222770590 -9.362428440  
H 2.020299620 0.593722283 -5.037712997  
N 0.268670193 0.182494786 -6.114639039  
C -0.786803467 0.807344619 -5.445212090  
C 1.130130582 -1.082905276 -4.104852662  
O -1.810168785 1.121234363 -6.051485933  
O 1.883492625 -0.914736263 -3.146310410  
C 0.134109884 -2.215876842 -4.086638050  
C -0.838621170 -2.464216226 -5.075700939  
C 0.253351624 -3.128049940 -3.021820788  
C -1.650651482 -3.596268558 -4.999758500  
H -0.958609881 -1.775621768 -5.899852466  
C -0.561824368 -4.251360527 -2.947151598  
H 1.009178101 -2.936969600 -2.269223803  
C -1.514345617 -4.493801235 -3.940461347  
H -2.394628413 -3.770074868 -5.772108755  
H -0.453721748 -4.942209356 -2.115793798  
H -2.149248527 -5.373826529 -3.883587928  
C 2.054496480 -2.447629574 -6.855593430  
H 1.047907136 -2.835516822 -6.742820807  
H 2.826791640 -3.211650490 -6.848738939  
C -4.288302151 -3.260214712 -2.129236862  
C -5.174333336 -3.497351271 -1.055657699  
C -3.422510141 -2.173482840 -2.118114459

H -4.272167715 -3.914909767 -2.991244035  
 C -5.117647086 -2.594657676 0.032087662  
 N -6.057887960 -4.567273564 -1.065331611  
 C -3.375420042 -1.260121931 -1.053213765  
 H -2.772387570 -2.029084307 -2.975664621  
 C -4.239606084 -1.518468902 0.027260630  
 H -5.767514416 -2.723843101 0.889279405  
 C -7.125759047 -4.609534601 -0.079440606  
 C -6.237555639 -5.317805386 -2.297148555  
 P -2.286696450 0.212330690 -1.235756388  
 H -4.244720052 -0.866485826 0.891696919  
 H -7.788505225 -3.731292672 -0.131295028  
 H -7.730091963 -5.503786121 -0.241661626  
 H -6.720991156 -4.668690173 0.937259474  
 H -5.297060569 -5.784352051 -2.612095995  
 H -6.958891506 -6.119408723 -2.128532824  
 H -6.601720606 -4.693807543 -3.128685693  
 C -3.464755492 1.712951785 -1.002011528  
 C -1.023325597 0.082547603 0.192015833  
 C -2.736574166 2.999534621 -1.441402461  
 C -4.634328256 1.468957425 -1.980663026  
 C -4.019493419 1.934868216 0.416194014  
 C -1.603223103 -0.281291397 1.571378961  
 C -0.060455653 -1.045922698 -0.234853913  
 C -0.229543639 1.399390015 0.288041137  
 H -3.440765519 3.840108463 -1.390947286  
 H -1.886390466 3.246664669 -0.802506696  
 H -2.371735408 2.927738902 -2.465045003  
 H -5.279960581 2.355820228 -1.999436156  
 H -5.244330391 0.610161841 -1.687004165  
 H -4.269392856 1.297859192 -2.999863181  
 H -4.583346981 1.078783088 0.791613567  
 H -3.228635683 2.175421523 1.131810822  
 H -4.708575010 2.789510590 0.398155319  
 H -0.786025061 -0.307415536 2.304113070  
 H -2.339817817 0.439769971 1.932154639  
 H -2.064348443 -1.272266114 1.562954750  
 H 0.666434718 -1.224946875 0.568140617  
 H 0.494911018 -0.790446098 -1.140470806  
 H -0.597715423 -1.983454398 -0.413897639  
 H 0.127049957 1.732663045 -0.691875553  
 H -0.822011504 2.203931580 0.734118766  
 H 0.646876239 1.245588226 0.930309913

A1'

C 1.712639300 1.776241800 -1.132290100  
 C 3.095464500 2.001303000 -1.224890000  
 C 0.860853430 2.546968500 -1.944963200  
 C 3.610231400 2.958274000 -2.102511200  
 H 3.781338700 1.443259500 -0.597143770  
 C 1.374865400 3.505005800 -2.825297600  
 H -0.219372960 2.415824400 -1.886804600  
 C 2.752217300 3.716895600 -2.901844700  
 H 4.685176400 3.117705600 -2.156751400  
 H 0.697462800 4.091253300 -3.442777400  
 H 3.153797400 4.467056800 -3.578647600  
 C -3.046162100 -1.711735400 -2.793590800  
 C -0.717449840 -1.279852500 -1.815590900  
 C -0.077491350 -1.610015000 -3.146674000  
 C -0.975759300 -2.111245900 -4.284933000  
 C -2.471370700 -2.386711400 -4.058846000  
 H -3.284613000 -0.658271500 -2.994277000  
 H -3.960865000 -2.207349000 -2.457390500  
 H 0.721206670 -0.929512140 -3.433286000  
 H -0.724888500 -1.731230900 -5.272318400  
 H -2.628850000 -3.468628000 -3.978102000  
 H -3.044497300 -2.051263300 -4.930423300

H -0.680464300 -0.174023540 -1.677055600  
 N -2.085194300 -1.764016400 -1.715070000  
 C -1.901628600 -2.599033800 -0.634858250  
 C -0.432951960 -2.084706500 -0.431477370  
 O -2.644741800 -3.394516500 -0.099878660  
 O -0.318803130 -1.265914900 0.673379600  
 C 0.662353500 -3.132887000 -0.475301770  
 C 1.945121500 -2.800303200 -0.933382100  
 C 0.443179160 -4.408794000 0.055262044  
 C 2.990180700 -3.718472500 -0.859634100  
 H 2.126736400 -1.811869700 -1.351463100  
 C 1.490356100 -5.330986500 0.129684150  
 H -0.549955100 -4.668678300 0.409064920  
 C 2.764812200 -4.990257300 -0.324854250  
 H 3.978536000 -3.444315400 -1.220737900  
 H 1.308437800 -6.319085600 0.545174660  
 H 3.577660300 -5.709575700 -0.266381140  
 C 0.038865007 -3.024827000 -3.644839800  
 H -0.342062740 -3.814756200 -3.002833000  
 H 0.937795640 -3.296399400 -4.190606600  
 C 1.970490700 4.988610700 1.095718300  
 C 3.198094400 5.403171500 1.665266200  
 C 3.920393700 4.434339500 2.397873400  
 C 3.446551600 3.134108500 2.540275000  
 C 2.237054600 2.716110000 1.966634000  
 C 1.519993000 3.688981000 1.242505100  
 N 3.668360000 6.690120000 1.499438400  
 C 5.001825000 7.034248400 1.976188700  
 C 3.021770700 7.567800500 0.528764550  
 P 1.537866700 1.020866600 1.988462300  
 C 2.837931400 -0.219524790 2.652622000  
 C 0.022127062 1.139853500 3.161395500  
 C 0.330582440 2.091053200 4.334586600  
 C -1.165781900 1.699400300 2.348505300  
 C -0.382932840 -0.251460300 3.684690700  
 C 2.299168000 -1.670596800 2.567878000  
 C 4.052901000 -0.134827390 1.700013900  
 C 3.259698600 0.048890382 4.112707000  
 H 1.378598500 5.669778000 0.497406930  
 H 4.872911000 4.682443600 2.849971300  
 H 4.064951400 2.444948000 3.099308300  
 H 0.610455330 3.411219400 0.725298640  
 H 5.799245400 6.449363700 1.480746000  
 H 5.186488600 8.093541000 1.786945600  
 H 5.087516000 6.872216700 3.062036500  
 H 1.980544100 7.784412400 0.814864460  
 H 3.557608800 8.518162000 0.494714620  
 H 3.013361000 7.137262300 -0.488685820  
 H -0.540756400 2.115700000 5.000163600  
 H 1.188894400 1.763198600 4.926887500  
 H 0.525692400 3.110796500 3.993023900  
 H -2.023805100 1.814374200 3.022380400  
 H -1.447611600 1.008622000 1.549336300  
 H -0.955725670 2.681999400 1.918466400  
 H -0.511983700 -0.963683900 2.866316000  
 H 0.336669920 -0.645167770 4.406383000  
 H -1.341107700 -0.152703400 4.209563300  
 H 3.155344700 -2.354985700 2.567530000  
 H 1.674327300 -1.927394200 3.423306200  
 H 1.711914800 -1.854385600 1.668898300  
 H 4.841288600 -0.797542040 2.075815700  
 H 4.473178400 0.868553340 1.609399400  
 H 3.774831800 -0.484790920 0.701470700  
 H 3.667552000 1.045518800 4.286076000  
 H 2.424679000 -0.094201826 4.802187400  
 H 4.033431500 -0.678643300 4.386476500  
 Pd 0.812950800 0.328249540 -0.065399150

**A1'-TS<sub>prox</sub>**

|    |              |              |              |
|----|--------------|--------------|--------------|
| C  | 1.643063226  | 2.986758297  | -1.924410855 |
| C  | 2.829534667  | 2.678324839  | -2.614027845 |
| C  | 1.085712371  | 4.262246906  | -2.111813492 |
| C  | 3.434093181  | 3.608717803  | -3.465387445 |
| H  | 3.293433154  | 1.701354132  | -2.494465854 |
| C  | 1.688772196  | 5.193722808  | -2.964092337 |
| H  | 0.171775327  | 4.538601841  | -1.592588104 |
| C  | 2.865241879  | 4.871073476  | -3.642451871 |
| H  | 4.350046634  | 3.344828337  | -3.989722182 |
| H  | 1.237021178  | 6.174432582  | -3.096499679 |
| H  | 3.334623058  | 5.596102681  | -4.302019961 |
| C  | -2.637282122 | 0.425821767  | -4.409939301 |
| C  | -0.504861386 | 0.787928084  | -3.116119054 |
| C  | 0.325916339  | 0.638165747  | -4.358418527 |
| C  | -0.394680474 | 0.304953181  | -5.676360318 |
| C  | -1.899149449 | -0.007620912 | -5.694929895 |
| H  | -2.863339693 | 1.499887520  | -4.439858786 |
| H  | -3.574925886 | -0.121468310 | -4.280587896 |
| H  | 1.140929016  | 1.353641110  | -4.424917117 |
| H  | -0.022336142 | 0.828080533  | -6.554042317 |
| H  | -2.041929289 | -1.086262949 | -5.831726554 |
| H  | -2.370055439 | 0.481829495  | -6.554696699 |
| H  | -0.635240557 | 1.859272274  | -2.893778167 |
| N  | -1.809227564 | 0.172198696  | -3.247446595 |
| C  | -1.858006320 | -0.845166152 | -2.356584289 |
| C  | -0.505227658 | -0.628474621 | -1.641541773 |
| O  | -2.713454763 | -1.692985015 | -2.166271047 |
| O  | -0.542224275 | -0.149403017 | -0.421946608 |
| C  | 0.546953919  | -1.687153805 | -1.901600430 |
| C  | 1.879395234  | -1.375107120 | -2.190751387 |
| C  | 0.182264668  | -3.029309751 | -1.730707964 |
| C  | 2.841678867  | -2.379695081 | -2.279668564 |
| H  | 2.154674008  | -0.337876646 | -2.357991026 |
| C  | 1.145855621  | -4.036091781 | -1.820413040 |
| H  | -0.856056014 | -3.271156716 | -1.526564352 |
| C  | 2.477880737  | -3.715335043 | -2.087846392 |
| H  | 3.873288187  | -2.121311891 | -2.504842611 |
| H  | 0.853546735  | -5.073708979 | -1.680954303 |
| H  | 3.226505400  | -4.500121418 | -2.158827195 |
| C  | 0.542115884  | -0.689221380 | -5.039485932 |
| H  | 0.090106004  | -1.569430235 | -4.589983525 |
| H  | 1.512657075  | -0.876102555 | -5.490941369 |
| C  | 2.359370826  | -1.935747052 | 1.642278755  |
| C  | 2.082624644  | -2.279675554 | 2.985192236  |
| C  | 2.121005446  | -0.654041596 | 1.175566535  |
| H  | 2.720617356  | -2.672371874 | 0.935358419  |
| C  | 1.603553226  | -1.248103598 | 3.828499566  |
| N  | 2.267872535  | -3.569921367 | 3.447671502  |
| C  | 1.380873769  | 0.034934009  | 3.341769984  |
| H  | 1.385090687  | -1.446667586 | 4.870764730  |
| C  | 1.609162827  | 0.364074720  | 1.995982193  |
| H  | 1.007193750  | 0.779223065  | 4.036159529  |
| P  | 1.266983052  | 1.988177337  | 1.227019338  |
| H  | 2.312710416  | -0.454857362 | 0.129424664  |
| C  | 1.767898796  | -3.933243991 | 4.762798237  |
| C  | 2.536904143  | -4.629615993 | 2.486887589  |
| H  | 0.679703427  | -3.793501415 | 4.855915582  |
| H  | 1.995806100  | -4.982374377 | 4.957923524  |
| H  | 2.254127419  | -3.340888291 | 5.546988138  |
| H  | 3.490842088  | -4.462634874 | 1.972618763  |
| H  | 2.608850099  | -5.582609008 | 3.013563174  |
| H  | 1.751497505  | -4.713457592 | 1.720817162  |
| C  | -0.289245444 | 2.754298249  | 2.045005405  |
| C  | 2.845309781  | 2.997761358  | 1.602490090  |
| Pd | 0.643456871  | 1.523297012  | -0.972000261 |
| C  | -0.827608249 | 3.844320137  | 1.089474891  |

|   |              |             |              |
|---|--------------|-------------|--------------|
| C | -1.358484085 | 1.643847792 | 2.156027863  |
| C | -0.060567996 | 3.390301703 | 3.429633087  |
| C | 3.253614056  | 2.914883484 | 3.088567870  |
| C | 3.972387591  | 2.355215537 | 0.765954468  |
| C | 2.677942375  | 4.469359589 | 1.184028220  |
| H | 4.212504199  | 3.433408963 | 3.212945086  |
| H | 2.537443583  | 3.394972799 | 3.756347310  |
| H | 3.391420767  | 1.880785584 | 3.414464837  |
| H | 4.913478210  | 2.875223734 | 0.983268335  |
| H | 3.779212428  | 2.441844447 | -0.303234429 |
| H | 4.110758175  | 1.299152811 | 1.017021474  |
| H | 2.384064627  | 4.564620673 | 0.136910807  |
| H | 1.945233318  | 4.994259449 | 1.803642309  |
| H | 3.637713653  | 4.985453001 | 1.310416609  |
| H | -1.705843721 | 4.316230555 | 1.547178156  |
| H | -0.094730059 | 4.628763058 | 0.884752182  |
| H | -1.138125972 | 3.410489444 | 0.134457986  |
| H | -2.307010238 | 2.106698743 | 2.456490440  |
| H | -1.098487589 | 0.894707041 | 2.906682127  |
| H | -1.512066536 | 1.123286511 | 1.207761325  |
| H | 0.357188077  | 2.691047647 | 4.157232631  |
| H | 0.590477932  | 4.266744418 | 3.382389824  |
| H | -1.029064818 | 3.725200288 | 3.821599180  |

**A2<sub>prox</sub>**

|   |              |              |              |
|---|--------------|--------------|--------------|
| C | 1.054011600  | 2.992792100  | -2.490706700 |
| C | 2.411744000  | 2.886465000  | -2.840840800 |
| C | 0.352376300  | 4.134638300  | -2.907170000 |
| C | 3.056393100  | 3.910924000  | -3.539583000 |
| H | 2.977398600  | 1.999823700  | -2.567250700 |
| C | 0.998930800  | 5.162157000  | -3.604534100 |
| H | -0.706405900 | 4.234296300  | -2.681105100 |
| C | 2.355631600  | 5.060085000  | -3.916652400 |
| H | 4.110841300  | 3.811256200  | -3.788688700 |
| H | 0.437165230  | 6.044410700  | -3.903859000 |
| H | 2.858589400  | 5.859075000  | -4.454646600 |
| C | -2.019397300 | -0.544501070 | -4.600418600 |
| C | -0.423138900 | 0.843001840  | -3.332099200 |
| C | 0.660464900  | 0.537545740  | -4.353055000 |
| C | 0.368220750  | -0.435895030 | -5.492768000 |
| C | -0.983087300 | -1.156007300 | -5.561116700 |
| H | -2.382775800 | 0.417249650  | -4.976484000 |
| H | -2.868628300 | -1.212799700 | -4.449100500 |
| H | 1.257523200  | 1.404332300  | -4.611356300 |
| H | 0.797217400  | -0.176346030 | -6.458335400 |
| H | -0.864472150 | -2.216883000 | -5.309525000 |
| H | -1.378734100 | -1.117306600 | -6.582665400 |
| H | -1.004341600 | 1.692269700  | -3.708797200 |
| N | -1.373483800 | -0.289311770 | -3.303461600 |
| C | -1.344497200 | -1.317613400 | -2.430831200 |
| C | -0.510152800 | -1.164023600 | -1.167438100 |
| O | -1.981088300 | -2.373383300 | -2.541283000 |
| O | -0.765007260 | -0.237588930 | -0.376371650 |
| C | 0.516056840  | -2.178112300 | -0.845731000 |
| C | 1.427821600  | -1.861853200 | 0.177254300  |
| C | 0.671039300  | -3.375416000 | -1.567818300 |
| C | 2.482768800  | -2.718515000 | 0.467862520  |
| H | 1.320685500  | -0.925561600 | 0.709644560  |
| C | 1.722999200  | -4.234845600 | -1.262199200 |
| H | -0.043466255 | -3.628827000 | -2.341696700 |
| C | 2.631374600  | -3.907655500 | -0.251475660 |
| H | 3.194379300  | -2.445977000 | 1.241816800  |
| H | 1.837524300  | -5.161749400 | -1.816695900 |
| H | 3.456927500  | -4.578599000 | -0.028180731 |
| C | 1.365421900  | -0.789385400 | -4.405488500 |
| H | 1.072572100  | -1.558000100 | -3.694186200 |
| H | 2.424438200  | -0.802937150 | -4.651232700 |

|    |              |              |              |   |              |              |              |
|----|--------------|--------------|--------------|---|--------------|--------------|--------------|
| C  | 4.290322000  | 0.534957300  | 1.001018000  | H | 1.477878403  | 0.539917919  | -7.817334657 |
| C  | 4.675732000  | 0.479954500  | 2.361082300  | H | 3.810506959  | -2.422405165 | -4.571918618 |
| C  | 3.085095200  | 1.114089700  | 0.622873960  | H | 4.438871555  | -2.481680932 | -6.960416619 |
| H  | 4.928752000  | 0.124240816  | 0.228363020  | H | 2.027111097  | -1.725735661 | -8.354919633 |
| C  | 3.766619700  | 1.010559900  | 3.309250600  | H | 3.576107073  | -0.906743738 | -8.495262492 |
| N  | 5.887518400  | -0.057970807 | 2.746087800  | H | 2.688136239  | -0.326098876 | -4.174507098 |
| C  | 2.572055800  | 1.595057500  | 2.907926800  | N | 1.500959880  | -0.333968950 | -5.933229720 |
| H  | 3.995237600  | 0.978129800  | 4.367755000  | C | 0.254923153  | -0.327284795 | -5.426177434 |
| C  | 2.191693500  | 1.666803700  | 1.555982700  | C | 0.627995220  | -1.162518487 | -4.189385409 |
| H  | 1.924676800  | 2.002710800  | 3.677230000  | O | -0.780524367 | 0.300959211  | -5.706285468 |
| P  | 0.687678040  | 2.499087300  | 0.913457800  | O | 0.361566489  | -0.482286063 | -3.033919660 |
| H  | 2.822702000  | 1.128763100  | -0.430908700 | C | 0.110166938  | -2.588495411 | -4.169284287 |
| C  | 6.180510500  | -0.240383580 | 4.163896600  | C | -0.975581259 | -3.003360214 | -4.946449968 |
| C  | 6.731071500  | -0.716298340 | 1.753923800  | C | 0.724003271  | -3.510733732 | -3.310193363 |
| H  | 5.458493000  | -0.914412740 | 4.669142200  | C | -1.413394838 | -4.331386824 | -4.899425715 |
| H  | 7.179876000  | -0.671363950 | 4.265574000  | H | -1.474198178 | -2.287090747 | -5.594185117 |
| H  | 6.176477400  | 0.725064930  | 4.703398700  | C | 0.294155765  | -4.834390003 | -3.267205882 |
| H  | 7.021805000  | -0.018505543 | 0.946883140  | H | 1.552941099  | -3.181818672 | -2.690281959 |
| H  | 7.647623500  | -1.059557900 | 2.240692600  | C | -0.772538865 | -5.251893384 | -4.070918181 |
| H  | 6.238782000  | -1.591963300 | 1.282045800  | H | -2.254852572 | -4.644608077 | -5.512156728 |
| C  | -0.768209400 | 2.084013200  | 2.119083400  | H | 0.786322147  | -5.543616141 | -2.606470778 |
| C  | 1.154391500  | 4.363648400  | 1.081899400  | H | -1.109759827 | -6.284389054 | -4.036394381 |
| Pd | 0.153934700  | 1.563523300  | -1.416823100 | C | 2.527211302  | -3.264275499 | -6.161829686 |
| C  | -2.069444400 | 2.241443400  | 1.297239400  | H | 1.477794871  | -3.253554849 | -6.441846694 |
| C  | -0.643311600 | 0.616473900  | 2.585523400  | H | 2.928210293  | -4.260677384 | -6.000505799 |
| C  | -0.893729750 | 2.960297800  | 3.380264000  | C | -7.199141965 | 2.575185974  | -2.247930269 |
| C  | 1.619652200  | 4.801228000  | 2.486099200  | C | -5.862130641 | 2.863143682  | -1.558506908 |
| C  | 2.342178000  | 4.624169300  | 0.130966810  | C | -4.937139135 | 1.636778795  | -1.557983179 |
| C  | -0.048597075 | 5.210263700  | 0.625223930  | C | -3.560301578 | 1.973713791  | -0.963006123 |
| H  | 1.944713100  | 5.847904700  | 2.428685200  | P | -2.112042927 | 0.852557261  | -1.313288420 |
| H  | 0.843291760  | 4.748902300  | 3.246242000  | C | -0.746455130 | 1.637764276  | -0.227667297 |
| H  | 2.479335800  | 4.215979000  | 2.823779800  | C | 0.629249703  | 0.945549659  | -0.440396495 |
| H  | 2.665888300  | 5.665130000  | 0.254418220  | C | 1.727118004  | 1.665456056  | 0.371427638  |
| H  | 2.078355600  | 4.480183600  | -0.911409000 | C | 1.374468854  | 1.642818056  | 1.871847284  |
| H  | 3.197301000  | 3.982606000  | 0.365159660  | C | 0.025233425  | 2.357353764  | 2.085067704  |
| H  | -0.381410450 | 4.919550400  | -0.374815640 | C | 0.133627141  | 3.816815187  | 1.601169225  |
| H  | -0.897505200 | 5.134144000  | 1.310934100  | C | 0.503594595  | 3.835615521  | 0.104859922  |
| H  | 0.244571500  | 6.267006400  | 0.583139100  | C | 1.851147895  | 3.122756019  | -0.108094388 |
| H  | -2.931371000 | 2.042673800  | 1.946789400  | C | -0.600853680 | 3.116467460  | -0.697295717 |
| H  | -2.183137400 | 3.254356000  | 0.898947360  | C | -1.077212602 | 1.621997437  | 1.287471966  |
| H  | -2.108036000 | 1.539597600  | 0.463027420  | C | -2.631676511 | -0.874219539 | -0.709918949 |
| H  | -1.554449000 | 0.348902850  | 3.136143400  | C | -1.393059388 | -1.775105733 | -0.461246048 |
| H  | 0.204092380  | 0.470485000  | 3.259703000  | C | -1.838770023 | -3.205493659 | -0.085948973 |
| H  | -0.548255300 | -0.072052660 | 1.748677400  | C | -2.679697991 | -3.816440288 | -1.221504168 |
| H  | -0.007568038 | 2.914068200  | 4.018363500  | C | -3.924423840 | -2.940990939 | -1.453256929 |
| H  | -1.100056300 | 4.007224000  | 3.148305200  | C | -4.772385653 | -2.874857729 | -0.168490032 |
| H  | -1.738580500 | 2.589199500  | 3.974736700  | C | -3.925165517 | -2.272613557 | 0.969292094  |

## C1

|    |              |              |              |   |              |              |              |
|----|--------------|--------------|--------------|---|--------------|--------------|--------------|
| Pd | -1.409562608 | 0.695961314  | -3.486759124 | H | -7.854638045 | 3.452739007  | -2.236191213 |
| C  | -2.919996547 | 1.800964814  | -4.183185392 | H | -7.033085861 | 2.294003752  | -3.293749129 |
| C  | -2.988319396 | 3.195522623  | -4.057791729 | H | -7.733412822 | 1.752487016  | -1.757423915 |
| C  | -3.881634466 | 1.149062845  | -4.972360716 | H | -6.030959821 | 3.204863220  | -0.527431160 |
| C  | -4.001065387 | 3.920992872  | -4.697402820 | H | -5.356379705 | 3.681246574  | -2.086505331 |
| H  | -2.252445848 | 3.726322110  | -3.458188870 | H | -4.825824711 | 1.289958619  | -2.586457703 |
| C  | -4.895373366 | 1.873543253  | -5.605709514 | H | -5.413748622 | 0.824990410  | -0.996167385 |
| H  | -3.845425051 | 0.068703548  | -5.090262233 | H | -3.638600470 | 2.101325357  | 0.122639408  |
| C  | -4.964208773 | 3.262600784  | -5.464662640 | H | -3.250681416 | 2.937265842  | -1.372608406 |
| H  | -4.037613964 | 5.003209123  | -4.591864741 | H | 0.585846689  | -0.098927005 | -0.128011066 |
| H  | -5.635094573 | 1.350689274  | -6.208325262 | H | 0.887005132  | 0.927281666  | -1.500599906 |
| H  | -5.754445693 | 3.824978727  | -5.954669983 | H | 2.676585312  | 1.140349282  | 0.206690486  |
| C  | 2.187845106  | 0.052986116  | -7.143679135 | H | 2.159836466  | 2.139243548  | 2.457563101  |
| C  | 2.130962169  | -1.031183880 | -4.803014934 | H | 1.311845791  | 0.606109718  | 2.228946707  |
| C  | 3.021587503  | -2.156347026 | -5.271394470 | H | -0.242902858 | 2.339514238  | 3.149265533  |
| C  | 3.409202335  | -2.196917944 | -6.758779219 | H | -0.819144826 | 4.340082168  | 1.760767428  |
| C  | 2.806164390  | -1.212766362 | -7.778789915 | H | 0.894870819  | 4.350695445  | 2.185034101  |
| H  | 2.969415619  | 0.780372873  | -6.885929093 | H | 0.570437372  | 4.873132334  | -0.246993659 |

H 2.124501804 3.145475791 -1.171190313  
H 2.645969145 3.642894304 0.443427737  
H -0.365136042 3.134287678 -1.769318216  
H -1.538022136 3.665788685 -0.557959646  
H -2.045799119 2.096588340 1.486503156  
H -1.142310858 0.588511860 1.643907021  
H -0.746694904 -1.775795989 -1.345724371  
H -0.807532662 -1.371799608 0.372348635  
H -0.941663138 -3.816298345 0.076774819  
H -2.086804937 -3.873694821 -2.138572084  
H -2.977908669 -4.841287303 -0.960530392  
H -4.524023644 -3.358827342 -2.272240049  
H -5.117063407 -3.879526400 0.110667528  
H -5.669043484 -2.262469780 -0.336752172  
H -4.522631638 -2.219218332 1.888833238  
H -2.081803110 -2.739658553 2.031346634  
H -2.986119672 -4.162234598 1.504571234  
H -4.381420418 -0.222043512 0.446558439  
H -2.921762192 -0.401433744 1.410720366  
H -4.346245160 -0.909039438 -2.089456457  
H -2.863076105 -1.574584903 -2.762894812

**C1-TS<sub>dis</sub>**

C -1.068094389 2.311515940 -3.294780232  
C -0.251606285 3.079278519 -2.450416605  
C -1.648015994 2.938068677 -4.409872628  
C -0.005983911 4.431246858 -2.720472265  
H 0.207604984 2.629506246 -1.574171004  
C -1.414680775 4.289929415 -4.672330987  
H -2.260496244 2.361358090 -5.095978081  
C -0.592377418 5.042208700 -3.828826503  
H 0.640079138 5.005181177 -2.059384794  
H -1.870883274 4.755779384 -5.543230507  
H -0.411678712 6.094011931 -4.035377274  
C 0.602008644 -2.127654502 -4.617283479  
C 0.962515358 -3.222397625 -5.614707029  
C 1.803515002 -2.897039902 -6.853522952  
C 2.156931206 -1.440643601 -7.175576041  
C 2.119262889 -0.539568842 -5.930071608  
H 2.994299686 -0.724328949 -5.294712539  
H 2.109234061 0.518244750 -6.203427808  
H 1.186800485 -4.171367113 -5.133119167  
H 2.566979669 -3.629299690 -7.104822089  
H 1.453080097 -1.039986490 -7.913584366  
H 3.154124851 -1.386210171 -7.626029416  
H 1.099946144 -2.328698063 -3.660957302  
N 0.932398848 -0.797297927 -5.126954718  
C -0.289806564 -0.202410490 -5.263708758  
Pd -1.297901876 0.328972174 -3.039540583  
C -0.915485028 -1.839480462 -4.330322730  
O -0.622037336 0.663013269 -6.049204618  
O -1.242870326 -1.796271117 -3.055675131  
C -2.000019354 -2.454505177 -5.190792086  
C -2.804668083 -1.708911636 -6.056436991  
C -2.269916494 -3.819206697 -5.012242551  
C -3.849932289 -2.325833582 -6.750276224  
H -2.609675430 -0.650887563 -6.191726863  
C -3.304843467 -4.434965887 -5.711700847  
H -1.658533478 -4.394115868 -4.322267886  
C -4.099507744 -3.687718904 -6.586303841  
H -4.470486655 -1.735453787 -7.419258248  
H -3.497866807 -5.495307566 -5.570153350  
H -4.911328791 -4.164836224 -7.128662758  
C 0.368507903 -3.328273896 -6.996969445  
H -0.341758826 -2.567510998 -7.307281863  
H 0.135031050 -4.322515705 -7.366321612  
C -4.584637828 5.391728651 -2.694371015

C -3.806815673 4.592775733 -1.644987441  
C -3.984712246 3.078450344 -1.822266175  
C -3.180373030 2.288410213 -0.774915630  
P -2.684477817 0.552442286 -1.214075523  
C -1.816849860 -0.070384607 0.364371076  
C -1.102083317 -1.426297404 0.100677657  
C -0.329205267 -1.877575809 1.358582783  
C -1.303489841 -2.025567298 2.544490196  
C -1.979540933 -0.668871089 2.827348144  
C -0.904495730 0.382135783 3.168021500  
C 0.069321000 0.518217721 1.980177950  
C 0.749532698 -0.835444192 1.706147110  
C -0.714967705 0.968336357 0.728898460  
C -2.771817132 -0.223413342 1.576232993  
C -4.297893727 -0.400633975 -1.575701404  
C -4.093666495 -1.933397508 -1.433106065  
C -5.385940170 -2.684705036 -1.823379613  
C -5.750145667 -2.378064370 -3.288311882  
C -5.978562309 -0.862283497 -3.439936890  
C -7.127661238 -0.407106493 -2.518331923  
C -6.762196187 -0.723376119 -1.053493270  
C -6.535190731 -2.240497594 -0.897051525  
C -5.473897352 0.038662459 -0.661212492  
C -4.684583434 -0.113649202 -3.059254889  
H -4.447163006 6.469971951 -2.559998403  
H -4.238770367 5.134678114 -3.701794084  
H -5.660158215 5.181894807 -2.642599852  
H -4.121341364 4.888440424 -0.633770127  
H -2.738796156 4.828086585 -1.730034069  
H -3.648945692 2.813757932 -2.827077016  
H -5.049590778 2.823035880 -1.762163741  
H -3.696816016 2.283387861 0.192149035  
H -2.226952599 2.801548779 -0.630390555  
H -1.820506748 -2.198993724 -0.176874775  
H -0.421120236 -1.328516547 -0.750128871  
H 0.144375427 -2.844602997 1.147063612  
H -0.764826977 -2.370100681 3.437293757  
H -2.064033038 -2.784056764 2.314950411  
H -2.678676824 -0.770197544 3.667419095  
H -1.376412119 1.350486264 3.382949159  
H -0.358479255 0.082329032 4.072096208  
H 0.827940225 1.277974987 2.208082685  
H 1.460431343 -0.738057887 0.874942837  
H 1.322529690 -1.156542432 2.586377690  
H -0.030153048 1.080200211 -0.119991148  
H -1.154790924 1.950606722 0.930333306  
H -3.286568263 0.722939136 1.784882824  
H -3.541867921 -0.970632633 1.360227594  
H -3.258685245 -2.252936065 -2.064408752  
H -3.851068019 -2.186321524 -0.395516413  
H -5.208681713 -3.761416506 -1.704576112  
H -4.946026481 -2.705340220 -3.956461904  
H -6.656563368 -2.928703068 -3.574731113  
H -6.220090870 -0.627610304 -4.484366251  
H -8.059631103 -0.919884906 -2.791323688  
H -7.305499427 0.670347138 -2.638510758  
H -7.574224381 -0.398624429 -0.389866220  
H -6.293009722 -2.479070749 0.148008251  
H -7.455914129 -2.785189929 -1.145380788  
H -5.654789124 1.114222435 -0.750922840  
H -5.241683062 -0.160388116 0.389819449  
H -4.822169287 0.959490152 -3.221479713  
H -3.871951335 -0.438382481 -3.717322554

**C2<sub>dis</sub>**

C -1.798325538 1.583423275 -4.217377589  
C -0.625833543 2.323613586 -4.013200686

|   |              |              |              |                            |              |              |               |
|---|--------------|--------------|--------------|----------------------------|--------------|--------------|---------------|
| C | -2.816577095 | 2.109934005  | -5.024750051 | H                          | -2.553337194 | -1.980368389 | -2.183670383  |
| C | -0.499450998 | 3.600394140  | -4.570661727 | H                          | -3.062674138 | -3.142359795 | -1.005222700  |
| H | 0.190328518  | 1.905331935  | -3.432935766 | H                          | -5.264070353 | -2.066502337 | -0.7180222616 |
| C | -2.682323384 | 3.388998671  | -5.576633493 | H                          | -4.929630567 | -0.929581435 | -2.014118486  |
| H | -3.708819783 | 1.524325260  | -5.225527635 | H                          | -3.271173168 | -1.113938579 | 0.564390150   |
| C | -1.529665799 | 4.141862646  | -5.342523530 | H                          | -4.630744248 | -0.023516715 | 0.395439491   |
| H | 0.409295198  | 4.172558062  | -4.396510803 | H                          | -2.061778768 | 3.771705574  | -0.945611102  |
| H | -3.481594917 | 3.793721322  | -6.193810881 | H                          | -2.567732438 | 3.223203248  | -2.533775506  |
| H | -1.429641402 | 5.136631921  | -5.768902833 | H                          | -3.244145462 | 5.563319773  | -2.147170259  |
| C | -1.118607940 | -1.161033742 | -7.289505470 | H                          | -4.946284941 | 6.098790106  | -0.365858412  |
| C | 0.303534109  | -0.670572241 | -5.316798724 | H                          | -3.457743570 | 5.465976955  | -0.343906610  |
| C | 1.481232504  | -1.247363240 | -6.115404119 | H                          | -5.454177928 | 4.350523358  | 1.359116319   |
| C | 1.269359242  | -1.961709289 | -7.438465195 | H                          | -6.924653278 | 2.910682884  | -0.065468075  |
| C | -0.169920055 | -2.190632839 | -7.899920944 | H                          | -6.993055344 | 4.592629048  | -0.600361639  |
| H | -0.893823397 | -0.160009613 | -7.691592706 | H                          | -6.715704125 | 3.038398844  | -2.554453005  |
| H | -2.159914348 | -1.392314199 | -7.512883602 | H                          | -4.704145983 | 4.133211432  | -3.572236252  |
| H | 2.351835206  | -0.601057750 | -6.042265629 | H                          | -5.682755456 | 5.319505075  | -2.695985276  |
| H | 1.987676696  | -1.730459130 | -8.221657882 | H                          | -4.627155226 | 1.705818029  | -2.782589734  |
| H | -0.506599942 | -3.197817223 | -7.625830856 | H                          | -5.554320103 | 1.225261429  | -1.356650349  |
| H | -0.228979059 | -2.123498569 | -8.992114441 | H                          | -4.752605217 | 2.006387099  | 1.010571662   |
| H | 0.370859835  | 0.420138919  | -5.397524426 | H                          | -3.345252811 | 3.064484764  | 1.122413054   |
| N | -0.994688433 | -1.114017008 | -5.823994439 | H                          | -0.010036417 | 1.898120659  | -1.138420833  |
| C | -2.142975982 | -0.885510738 | -5.078483325 | H                          | -0.726340875 | 2.883380588  | 0.139809875   |
| C | 0.594573020  | -0.978821421 | -3.836730269 | H                          | 1.706656476  | 2.644014819  | 0.499068190   |
| O | -3.256315354 | -1.157714083 | -5.525893262 | H                          | 2.002047915  | 0.396894924  | -0.570695578  |
| O | 1.235861525  | -0.139816107 | -3.203564554 | H                          | 2.675321446  | 0.405442586  | 1.069772562   |
| C | 0.387301599  | -2.349696418 | -3.236508034 | H                          | 1.273702094  | -1.645777694 | 0.677953343   |
| C | -0.464399132 | -3.344564220 | -3.746661077 | H                          | 1.320464791  | -0.673035586 | 2.993865222   |
| C | 1.146600682  | -2.642619714 | -2.091086591 | H                          | -0.242750493 | -1.418169651 | 2.646293325   |
| C | -0.559640165 | -4.584430262 | -3.114759501 | H                          | -0.552103693 | 0.831049044  | 3.701260902   |
| H | -1.058845460 | -3.148625397 | -4.628194481 | H                          | 0.196055273  | 2.880706415  | 2.476724212   |
| C | 1.043934203  | -3.876447899 | -1.456941267 | H                          | 1.580959995  | 1.863784461  | 2.885634005   |
| H | 1.818391894  | -1.879780937 | -1.714582916 | H                          | -2.255062043 | 0.049890101  | 2.080589076   |
| C | 0.184390129  | -4.853178727 | -1.965175480 | H                          | -2.077209164 | 1.799300596  | 2.010561011   |
| H | -1.222701708 | -5.342066033 | -3.522997443 | H                          | -1.136562160 | -1.433611517 | 0.232754949   |
| H | 1.638785745  | -4.079201722 | -0.570308414 | H                          | -0.211221720 | -0.636565298 | -1.037935923  |
| H | 0.101438738  | -5.819180971 | -1.474161865 | Pd                         | -2.135682403 | -0.122714598 | -3.184815846  |
| C | 1.782680223  | -2.721826593 | -6.242423838 | =====                      |              |              |               |
| H | 1.103902272  | -3.432199420 | -5.781708254 | <b>C2-TS<sub>dis</sub></b> |              |              |               |
| H | 2.826495807  | -3.021663580 | -6.210507868 | =====                      |              |              |               |
| C | -4.061869080 | -3.330488066 | -2.933321950 | Pd                         | -1.140750312 | 0.129256229  | -3.592295492  |
| C | -3.461017585 | -2.497449715 | -1.800647145 | C                          | -0.207109321 | 2.046700363  | -3.902437134  |
| C | -4.458718306 | -1.496751441 | -1.202206114 | C                          | 1.061018350  | 2.138279753  | -3.295489485  |
| C | -3.843541879 | -0.535023325 | -0.167268032 | C                          | -1.016332049 | 3.195826278  | -3.940986838  |
| P | -2.687874577 | 0.743421960  | -0.919876137 | C                          | 1.484328065  | 3.341894917  | -2.722360225  |
| C | -3.718321409 | 2.341579392  | -0.899675519 | H                          | 1.700526674  | 1.268344512  | -3.202468195  |
| C | -2.934785722 | 3.514223058  | -1.551571779 | C                          | -0.589201061 | 4.390923751  | -3.364991490  |
| C | -3.833944567 | 4.762477645  | -1.683941471 | H                          | -1.966737317 | 3.142318270  | -4.461028311  |
| C | -4.316912425 | 5.202099679  | -0.287854273 | C                          | 0.663187408  | 4.469619215  | -2.746609178  |
| C | -5.115666628 | 4.051078178  | 0.358666516  | H                          | 2.458493440  | 3.386203093  | -2.240914838  |
| C | -6.335307787 | 3.716706520  | -0.523828039 | H                          | -1.232558436 | 5.266590006  | -3.408171001  |
| C | -5.852411825 | 3.289381691  | -1.924653213 | H                          | 0.996689805  | 5.401901689  | -2.298909449  |
| C | -5.047248141 | 4.431936620  | -2.574093924 | C                          | 0.673783725  | 0.941496820  | -7.520130904  |
| C | -4.959303293 | 2.037533164  | -1.791626119 | C                          | 1.512796620  | -0.207802862 | -5.491717538  |
| C | -4.205346408 | 2.806060186  | 0.495360595  | C                          | 2.368943953  | -1.076681118 | -6.425155022  |
| C | -1.221456686 | 0.764521013  | 0.282996782  | C                          | 2.188115495  | -1.033403493 | -7.932058144  |
| C | -0.249474127 | 1.920288553  | -0.069643623 | C                          | 1.049077391  | -0.178666637 | -8.488879103  |
| C | 1.041178318  | 1.815406331  | 0.772452776  | H                          | 1.503204879  | 1.664459577  | -7.447865465  |
| C | 1.742853031  | 0.471030244  | 0.493026725  | H                          | -0.218882566 | 1.471720402  | -7.850920624  |
| C | 0.793052480  | -0.680339969 | 0.879041232  | H                          | 3.387121691  | -1.156351873 | -6.054135241  |
| C | 0.420354612  | -0.586376943 | 2.370739567  | H                          | 3.103606856  | -1.043576701 | -8.518899663  |
| C | -0.280237132 | 0.759749308  | 2.640064905  | H                          | 0.163809873  | -0.795570081 | -8.684448062  |
| C | 0.674264257  | 1.913830385  | 2.268197793  | H                          | 1.345870920  | 0.263976899  | -9.446147674  |
| C | -1.569462195 | 0.855340564  | 1.790300722  | H                          | 2.181709295  | 0.568628282  | -5.096716836  |
| C | -0.481948547 | -0.578797967 | 0.019348967  | N                          | 0.390282141  | 0.414830174  | -6.177316320  |
| H | -3.357741253 | -4.095066384 | -3.273061173 | C                          | -0.666439608 | 0.983714081  | -5.466043286  |
| H | -4.975719968 | -3.837063642 | -2.600409503 | C                          | 1.152596551  | -1.090139716 | -4.279887219  |
| H | -4.303153082 | -2.693704241 | -3.790129859 | O                          | -1.657598156 | 1.416235121  | -6.051829547  |

O 1.929898179 -1.056028033 -3.323162606  
C 0.081754000 -2.155639029 -4.331232271  
C -0.995807384 -2.198921582 -5.244529251  
C 0.203841318 -3.202837762 -3.395599068  
C -1.928431130 -3.238614333 -5.187147316  
H -1.094515541 -1.445024802 -6.013236439  
C -0.715700339 -4.243487023 -3.358523245  
H 1.043580480 -3.178505705 -2.710975533  
C -1.794285884 -4.260739631 -4.249174853  
H -2.757157542 -3.246437696 -5.889239039  
H -0.595947016 -5.042434990 -2.631764443  
H -2.519651681 -5.068868188 -4.213329141  
C 1.853924426 -2.287547508 -7.165132648  
H 0.803528154 -2.543855980 -7.075366334  
H 2.515451738 -3.146453813 -7.235643289  
C -4.908847721 4.430346656 -2.750629447  
C -3.949717237 3.807014540 -1.731922675  
C -3.786896740 2.293847035 -1.929574423  
C -2.753179161 1.697699878 -0.963053876  
P -2.122832882 -0.007158776 -1.389385074  
C -0.860004450 -0.338165648 0.000417981  
C 0.000198360 -1.564648837 -0.407498574  
C 1.116194410 -1.821079425 0.625314846  
C 0.492036311 -2.052290935 2.016336691  
C -0.315079300 -0.805425795 2.433753041  
C 0.622885923 0.417391302 2.476280868  
C 1.235624077 0.641272385 1.078949990  
C 2.052062429 -0.598002397 0.664499000  
C 0.096357451 0.889741395 0.066970698  
C -1.452264636 -0.562502239 1.412624208  
C -3.642976436 -1.147531605 -1.230651519  
C -3.219670229 -2.621967199 -1.000482178  
C -4.452772696 -3.552423985 -1.005313896  
C -5.170363730 -3.465267441 -2.365917922  
C -5.615340398 -2.009782650 -2.607383252  
C -6.584895560 -1.571988164 -1.490392197  
C -5.872481280 -1.668662582 -0.125551427  
C -5.419381933 -3.122656670 0.116526747  
C -4.640611818 -0.734229856 -0.117739787  
C -4.374063409 -1.092302116 -2.607359612  
H -5.016273413 5.509648126 -2.596718935  
H -4.546215270 4.272345315 -3.773533502  
H -5.907609960 3.982434378 -2.683169109  
H -4.304042071 4.007157004 -0.710951334  
H -2.964167963 4.281820914 -1.817380142  
H -3.473044373 2.095782331 -2.961882012  
H -4.763946813 1.811887891 -1.804061483  
H -3.114891481 1.739209397 0.071824793  
H -1.857802123 2.323428124 -1.019006620  
H -0.618849917 -2.461038528 -0.503196925  
H 0.450567937 -1.373671644 -1.385006574  
H 1.682881817 -2.710469385 0.319754148  
H 1.277193842 -2.254838626 2.757246667  
H -0.163256136 -2.934264391 1.993783458  
H -0.758606290 -0.966712127 3.425156634  
H 0.064659645 1.309651317 2.791425056  
H 1.416114365 0.255837626 3.218589858  
H 1.885311406 1.526069652 1.096666998  
H 2.499991526 -0.444343630 -0.325279696  
H 2.872210405 -0.765267477 1.376101588  
H 0.508231531 1.096806251 -0.926057938  
H -0.451465347 1.784130495 0.382732601  
H -2.046229328 0.308597094 1.719086477  
H -2.123178707 -1.427582926 1.419179120  
H -2.515784776 -2.932034273 -1.780725871  
H -2.707722153 -2.728876347 -0.039023729  
H -4.116098671 -4.582679916 -0.829002172  
H -4.494118768 -3.787581059 -3.168016164

H -6.038596062 -4.138034538 -2.379621586  
H -6.113026832 -1.930532128 -3.582423884  
H -7.479449016 -2.209256433 -1.494933438  
H -6.922628795 -0.541824751 -1.666879863  
H -6.558832663 -1.357522785 0.672752520  
H -4.923605158 -3.204605198 1.093570793  
H -6.290895170 -3.790548944 0.141730766  
H -4.975045978 0.298017620 -0.265874886  
H -4.156634020 -0.773776571 0.863911766  
H -4.676274562 -0.068277455 -2.845071102  
H -3.681223051 -1.406759073 -3.397816441

C1'

C 1.672119119 1.751910397 -1.127034308  
C 2.601427917 1.313960554 -2.090809320  
C 1.280153830 3.100047432 -1.149188385  
C 3.093867077 2.186775332 -3.066175488  
H 2.963905542 0.287333750 -2.073285091  
C 1.774853168 3.974610448 -2.122836218  
H 0.577431435 3.474900635 -0.408917437  
C 2.682101090 3.521034985 -3.083094245  
H 3.809586992 1.827825335 -3.802711029  
H 1.452675593 5.013629858 -2.130555401  
H 3.071105533 4.203231933 -3.834317761  
C -3.250444554 -1.653214452 -2.486633452  
C -0.832231795 -1.263327874 -1.734875238  
C -0.335382934 -1.531942780 -3.139338827  
C -1.347961849 -1.985818076 -4.199176632  
C -2.812389977 -2.275013641 -3.831559475  
H -3.501707545 -0.591918503 -2.617269831  
H -4.128177028 -2.161658662 -2.079061921  
H 0.431010576 -0.837491109 -3.477062099  
H -1.199352740 -1.562973283 -5.189832724  
H -2.962552004 -3.359703163 -3.779526756  
H -3.471582162 -1.905157092 -4.624730610  
H -0.775789603 -0.164042707 -1.550075334  
N -2.183450436 -1.753545501 -1.516679970  
C -1.895380169 -2.635694175 -0.499177985  
C -0.410829746 -2.132096175 -0.423093523  
O -2.585194729 -3.451270740 0.075577847  
O -0.193174436 -1.366177209 0.704391128  
C 0.658618604 -3.188756857 -0.622893383  
C 1.868151564 -2.884499689 -1.260635871  
C 0.475807300 -4.476759634 -0.105199626  
C 2.874585686 -3.841196795 -1.383408904  
H 2.018001425 -1.891826493 -1.676942221  
C 1.482001185 -5.438183601 -0.228005184  
H -0.463492778 -4.718475780 0.382559162  
C 2.682366931 -5.125838789 -0.868064714  
H 3.805792559 -3.587364270 -1.883963712  
H 1.325535750 -6.435159565 0.175849651  
H 3.463542802 -5.875207869 -0.964034914  
C -0.274622404 -2.923624554 -3.708778583  
H -0.588527521 -3.741732341 -3.065816066  
H 0.561744293 -3.169879067 -4.356679586  
P 1.809242042 0.909011434 1.910805709  
Pd 0.817026015 0.301606535 -0.039774077  
C 5.952556792 3.668659527 -0.261193442  
C 4.707175856 3.725408052 0.627888991  
C 4.190427716 2.325717987 0.990300133  
C 2.911132498 2.403493542 1.838103375  
C 2.865585721 -0.518815036 2.580963022  
C 1.970875419 -1.657919601 3.139301049  
C 2.847016980 -2.847629434 3.589660640  
C 3.813444538 -2.379573371 4.696663572  
C 4.721280860 -1.262105345 4.142840871  
C 5.529465360 -1.800795823 2.944367638

C 4.557422661 -2.274553369 1.845050231  
C 3.649330172 -3.392063202 2.393082440  
C 3.682452621 -1.090539219 1.383465629  
C 3.855575480 -0.061746656 3.687607215  
C 0.412184219 1.453443290 3.091109997  
C -0.737489894 0.406726594 3.129572451  
C -1.891260471 0.912765997 4.020926186  
C -2.458066957 2.220807442 3.438794723  
C -1.340682971 3.279210449 3.401240313  
C -0.815476386 3.537603646 4.828220122  
C -0.258871079 2.224243329 5.414306606  
C -1.377249931 1.162709984 5.452552519  
C 0.908454300 1.709457615 4.537964417  
C -0.177344270 2.778023107 2.519810037  
H 6.318002716 4.671870953 -0.504927758  
H 6.769326065 3.126315046 0.230138047  
H 5.726951699 3.156211153 -1.203188353  
H 3.909998186 4.265345487 0.100741155  
H 4.922090407 4.291450212 1.545312371  
H 4.973344200 1.774366976 1.524118298  
H 3.990877709 1.781893990 0.063973645  
H 2.273935302 3.181415083 1.412999823  
H 3.147400737 2.707423360 2.864676170  
H 1.411431000 -1.297089272 4.009128518  
H 1.244745799 -1.965468113 2.378453235  
H 2.187325068 -3.632897215 3.979474116  
H 4.426729877 -3.220010906 5.047891895  
H 3.247188419 -2.010450494 5.562993000  
H 5.407202182 -0.916511935 4.927256177  
H 6.192663976 -1.016672661 2.553465205  
H 6.170127289 -2.631720403 3.268246782  
H 5.120443406 -2.646786072 0.979650097  
H 2.969597552 -3.741086533 1.609292591  
H 4.256732114 -4.252482590 2.705359128  
H 2.994076242 -1.431798494 0.605926882  
H 4.318094558 -0.317163717 0.942254650  
H 4.513017823 0.733112386 3.319471435  
H 3.314025028 0.341789997 4.548998189  
H -1.099151144 0.200349084 2.119568128  
H -0.379312853 -0.548796207 3.514309017  
H -2.674314458 0.145003687 4.036368126  
H -2.843679359 2.043816273 2.426095347  
H -3.298523137 2.580122980 4.047469338  
H -1.724079217 4.213944730 2.971946349  
H -1.624582408 3.918622877 5.464650418  
H -0.031327385 4.306992440 4.809240271  
H 0.120965990 2.403359058 6.428274221  
H -0.995535911 0.227833851 5.883990397  
H -2.197241201 1.504737156 6.097865089  
H 1.724999051 2.442275347 4.549489589  
H 1.295675140 0.781691251 4.971904922  
H 0.586357203 3.562006485 2.480671213  
H -0.529526264 2.605844445 1.494935634

**CI'-TS<sub>prox</sub>**

Pd 0.266521666 1.604661700 -0.822076970  
C 1.453241798 3.049959064 -1.577696211  
C 2.853679719 2.993541203 -1.475160244  
C 0.892399632 4.078872904 -2.355405627  
C 3.665134430 3.925076270 -2.132949154  
H 3.325689848 2.216509468 -0.877987158  
C 1.701712748 5.014500248 -3.008572080  
H -0.188697060 4.164766428 -2.448321940  
C 3.092632952 4.944051140 -2.897157431  
H 4.747144254 3.855793668 -2.043117631  
H 1.243041839 5.802808718 -3.601613553  
H 3.721364680 5.673057780 -3.400820024

C -2.118604818 0.099627417 -4.857937311  
C -0.400517302 0.755699877 -3.128500124  
C 0.700789564 0.714399627 -4.147108545  
C 0.350624937 0.271566843 -5.578664641  
C -1.055602294 -0.244598948 -5.923413721  
H -2.470835551 1.132077321 -4.984914905  
H -2.981648597 -0.568945313 -4.918695680  
H 1.408443883 1.533760710 -4.053493264  
H 0.841514402 0.832832781 -6.370351613  
H -1.021630897 -1.334172902 -6.042777815  
H -1.376518670 0.165952298 -6.887388667  
H -0.712686452 1.798386256 -2.956855253  
N -1.552488205 -0.025375967 -3.529467664  
C -1.694759371 -1.011434836 -2.614904837  
C -0.574430540 -0.611567755 -1.628572511  
O -2.473786695 -1.948392987 -2.572271706  
O -0.953020079 -0.110944924 -0.472807834  
C 0.636247361 -1.526279333 -1.616039157  
C 1.946298182 -1.034176550 -1.572721395  
C 0.428702561 -2.911689040 -1.573923122  
C 3.030927965 -1.903405210 -1.477548605  
H 2.113682845 0.037556896 -1.640335933  
C 1.516055552 -3.782571113 -1.472671389  
H -0.585386948 -3.295731013 -1.624605402  
C 2.818280678 -3.283377011 -1.423391729  
H 4.041583401 -1.503792868 -1.452513700  
H 1.343175466 -4.854894460 -1.434366422  
H 3.662773072 -3.963362848 -1.348732322  
C 1.240604064 -0.576889421 -4.707469983  
H 0.819713129 -1.506542212 -4.333916457  
H 2.304528751 -0.629869663 -4.920800730  
C 2.008422693 7.376448448 0.274924589  
C 2.397405029 6.047475575 0.929311589  
C 1.202267729 5.091436107 1.056125176  
C 1.624452508 3.741245959 1.658297471  
P 0.524814186 2.269726485 1.367763448  
C 1.388599425 0.890010319 2.374455992  
C 0.734616830 -0.501532200 2.137204553  
C 1.508849362 -1.598988185 2.900193145  
C 1.511662574 -1.285067743 4.409521788  
C 2.194501282 0.077838734 4.643587053  
C 3.643398862 0.026509802 4.119135917  
C 3.632080481 -0.303431599 2.613221983  
C 2.957186221 -1.667929477 2.382374695  
C 2.857077346 0.799962747 1.860254797  
C 1.407088951 1.181031163 3.897964600  
C -1.186534738 2.724821599 2.062029657  
C -2.025993946 1.451351793 2.350741351  
C -3.448903365 1.840038146 2.810046450  
C -4.154213757 2.653211266 1.707946104  
C -3.341785668 3.932575301 1.428062398  
C -3.243619051 4.782491889 2.710997739  
C -2.544275572 3.963257554 3.814610862  
C -3.356503962 2.682996584 4.098282983  
C -1.116611002 3.583693483 3.354033787  
C -1.925046214 3.542070137 0.957606305  
H 2.867198904 8.051896794 0.197359860  
H 1.625106989 7.205430724 -0.737361396  
H 1.228485271 7.891972865 0.848375082  
H 2.836435649 6.227245551 1.920961127  
H 3.170662387 5.559278039 0.322780773  
H 0.776884218 4.939854006 0.061931458  
H 0.423786518 5.560718434 1.669293724  
H 1.805660915 3.840241753 2.734601633  
H 2.573458539 3.453654784 1.199887564  
H -0.303996877 -0.505272860 2.470218769  
H 0.709762830 -0.730503582 1.071497966  
H 1.007489513 -2.557807984 2.719967370



H 2.043838282 -2.071115489 4.961731071  
H 0.482866424 -1.261353206 4.793640646  
H 2.196882041 0.315179724 5.715297028  
H 4.142289137 0.990091238 4.292914161  
H 4.214152317 -0.733915602 4.667982989  
H 4.661171225 -0.325551115 2.231331781  
H 2.962562669 -1.919407933 1.315578841  
H 3.513269372 -2.456059360 2.908007462  
H 2.851420469 0.582690682 0.785338149  
H 3.382960606 1.749731207 2.006082868  
H 1.862331432 2.157155982 4.106494276  
H 0.383949154 1.209663212 4.287287452  
H -2.067769115 0.817489431 1.458417042  
H -1.556418605 0.868967240 3.149666260  
H -4.012216800 0.919719177 3.008430099  
H -4.237775492 2.052237946 0.793388142  
H -5.174181051 2.911389900 2.022358406  
H -3.825698616 4.514713677 0.633409611  
H -4.246061548 5.082324142 3.043744540  
H -2.681298678 5.704767045 2.511080283  
H -2.466834873 4.564594659 4.729619045  
H -2.876318171 2.101019541 4.896808349  
H -4.361861228 2.946262776 4.452572603  
H -0.541240478 4.498762280 3.181192225  
H -0.611475306 3.034768847 4.154728313  
H -1.361441388 4.444469021 0.703053932  
H -1.992114559 2.937975324 0.045065595

C2<sub>prox</sub>

Pd -1.700811026 -0.353752985 0.153587982  
C -0.771582534 1.017961162 -0.964797924  
C 0.508461009 0.743805182 -1.478001969  
C -1.363302939 2.250438123 -1.278078486  
C 1.193031978 1.695765617 -2.239097124  
H 0.978423335 -0.215395546 -1.282804462  
C -0.676944752 3.202201972 -2.042330418  
H -2.364320123 2.480858271 -0.922601465  
C 0.608859616 2.935297829 -2.516842163  
H 2.187013783 1.466802931 -2.617834394  
H -1.151244113 4.155812249 -2.264601775  
H 1.142752507 3.675887385 -3.105989015  
C -4.736582389 -1.796214144 -2.699279495  
C -2.770093910 -0.711782848 -1.663844634  
C -2.003458793 -0.876174433 -2.966439003  
C -2.638213933 -1.634318876 -4.131189047  
C -4.014247363 -2.287546734 -3.965885550  
H -5.099827423 -0.771291645 -2.829505876  
H -5.576829824 -2.442549938 -2.439229256  
H -1.424738088 -0.000942174 -3.235290756  
H -2.439942164 -1.229155180 -5.121221737  
H -3.917873838 -3.378568334 -3.907782530  
H -4.640853615 -2.073008526 -4.839349048  
H -3.340393626 0.223535491 -1.727066586  
N -3.784755618 -1.781642351 -1.578894227  
C -3.658355417 -2.916631406 -0.865737993  
C -2.579642283 -2.975254879 0.206279959  
O -4.378664887 -3.918041458 -0.959885732  
O -2.651306511 -2.202266890 1.180065356  
C -1.568666438 -4.05056924 0.152627480  
C -0.513068917 -4.008176561 1.079771111  
C -1.589118594 -5.065820096 -0.822473687  
C 0.515056023 -4.941877509 1.022021614  
H -0.506581976 -3.222125463 1.824597972  
C -0.558272463 -6.000835356 -0.873487256  
H -2.420997604 -5.126966492 -1.514385996  
C 0.495801987 -5.938239719 0.041003191  
H 1.333347081 -4.891364778 1.734278979

H -0.577790250 -6.781676157 -1.628127076  
H 1.301659090 -6.665451119 -0.009383231  
C -1.434732982 -2.197691553 -3.400416948  
H -1.603598968 -3.060782346 -2.761803863  
H -0.471158840 -2.206431089 -3.903508919  
C 3.503539494 -2.564019421 0.567407265  
C 2.820355323 -2.021840020 1.826898988  
C 1.632918972 -1.107377250 1.500482137  
C 0.879545299 -0.658557318 2.763845845  
P -0.667917900 0.334234652 2.402635346  
C -1.943958528 -0.110088940 3.785308555  
C -3.357038344 0.185397935 3.197323452  
C -4.462766095 -0.274568657 4.169895869  
C -4.323039813 0.481086661 5.504468136  
C -2.941132806 0.178871569 6.116023674  
C -2.825979068 -1.333242984 6.383999145  
C -2.958724409 -2.087274433 5.047559572  
C -4.329793590 -1.791779458 4.408377390  
C -1.828096665 -1.629771050 4.101592974  
C -1.831987478 0.639390535 5.137535226  
C -0.063524764 2.140560632 2.620115729  
C -1.268424182 3.086808790 2.376500568  
C -0.814524951 4.562407525 2.403155618  
C 0.232441972 4.801667635 1.297045656  
C 1.455721278 3.898367663 1.550207327  
C 2.078600059 4.238370545 2.915509890  
C 1.031385014 3.976623410 4.013019556  
C -0.197335974 4.880680952 3.780069544  
C 0.591072527 2.491490614 3.986943570  
C 1.019530021 2.416950996 1.537114684  
H 4.360232406 -3.200842241 0.814343802  
H 2.802252921 -3.160097709 -0.028448240  
H 3.866812703 -1.746572086 -0.066643349  
H 3.547358705 -1.474575881 2.443222875  
H 2.471061035 -2.861697539 2.445536364  
H 0.939626840 -1.637139469 0.835407752  
H 1.983562143 -0.239306958 0.931179366  
H 1.544818354 -0.090479661 3.423455218  
H 0.582849395 -1.549354497 3.322603329  
H -3.460616683 1.260247010 3.004833440  
H -3.486582864 -0.323892427 2.240425305  
H -5.439360796 -0.056162431 3.718788250  
H -5.116506335 0.177436858 6.200597982  
H -4.435935250 1.561464058 5.339088693  
H -2.822888370 0.732811510 7.056743775  
H -1.859718297 -1.564036546 6.853345329  
H -3.609099321 -1.650952493 7.085450088  
H -2.855141176 -3.167135327 5.216582801  
H -4.423180254 -2.329364651 3.456581788  
H -5.135086369 -2.144646824 5.066658030  
H -1.865926709 -2.212431026 3.181720513  
H -0.870888599 -1.831257806 4.597894573  
H -0.847259647 0.466930115 5.589853240  
H -1.943855154 1.717159030 4.987840379  
H -1.730395809 2.851865503 1.411218594  
H -2.032072206 2.933482089 3.148468246  
H -1.688848080 5.203961331 2.231719625  
H -0.196979423 4.578219890 0.313840962  
H 0.538994763 5.856657401 1.290540575  
H 2.192737708 4.045962484 0.750609182  
H 2.400809530 5.288245641 2.941157161  
H 2.971337746 3.621936896 3.089755194  
H 1.464150462 4.191140174 4.999259422  
H -0.940454011 4.720247157 4.573589401  
H 0.100254617 5.936825912 3.826803293  
H 1.467288944 1.854848744 4.163917758  
H -0.093550798 2.328656026 4.816126150  
H 1.898259692 1.786939564 1.725664533

H 0.647868845 2.163334218 0.548468105

**1.6 Vibrational Frequencies of the Optimized Geometries**  
**Table S7. Vibrational Frequencies (in cm<sup>-1</sup>) of the Optimized Geometries**

**Pd(Ruphos)**

|         |         |         |         |         |         |
|---------|---------|---------|---------|---------|---------|
| 24.84   | 35.12   | 39.23   | 42.09   | 50.44   | 55.79   |
| 60.95   | 63.64   | 66.91   | 69.80   | 74.15   | 79.04   |
| 84.39   | 90.45   | 93.99   | 105.77  | 130.32  | 145.37  |
| 158.40  | 171.99  | 191.60  | 197.68  | 209.34  | 221.05  |
| 224.85  | 228.82  | 238.46  | 245.31  | 248.46  | 255.78  |
| 265.05  | 272.90  | 274.27  | 291.71  | 299.58  | 334.00  |
| 337.44  | 344.94  | 380.80  | 391.59  | 401.15  | 405.02  |
| 424.74  | 430.82  | 440.50  | 446.66  | 451.77  | 458.37  |
| 475.37  | 479.93  | 485.56  | 494.13  | 511.44  | 531.95  |
| 533.25  | 567.58  | 582.52  | 603.79  | 637.37  | 638.34  |
| 687.29  | 719.53  | 737.27  | 745.28  | 753.84  | 764.25  |
| 772.64  | 779.76  | 782.43  | 807.65  | 811.79  | 823.81  |
| 826.41  | 826.69  | 844.15  | 862.26  | 866.66  | 870.85  |
| 890.27  | 899.65  | 903.95  | 907.19  | 909.84  | 920.64  |
| 937.97  | 943.61  | 944.90  | 948.53  | 952.35  | 958.82  |
| 959.31  | 964.92  | 980.67  | 989.31  | 1021.34 | 1022.40 |
| 1026.12 | 1044.25 | 1048.28 | 1061.34 | 1065.32 | 1069.74 |
| 1095.84 | 1096.82 | 1099.00 | 1099.20 | 1106.31 | 1109.29 |
| 1129.38 | 1135.72 | 1149.25 | 1153.30 | 1156.95 | 1159.45 |
| 1164.14 | 1167.43 | 1201.31 | 1204.35 | 1207.26 | 1209.51 |
| 1210.11 | 1222.70 | 1224.91 | 1256.55 | 1274.41 | 1282.09 |
| 1295.01 | 1296.93 | 1301.37 | 1304.91 | 1309.75 | 1315.74 |
| 1317.28 | 1318.95 | 1325.20 | 1336.93 | 1342.50 | 1350.90 |
| 1366.92 | 1368.97 | 1369.74 | 1376.41 | 1379.14 | 1386.14 |
| 1388.27 | 1389.84 | 1391.89 | 1392.00 | 1394.17 | 1395.25 |
| 1396.50 | 1399.83 | 1419.23 | 1422.42 | 1431.46 | 1433.91 |
| 1471.12 | 1492.25 | 1493.06 | 1494.39 | 1496.39 | 1498.64 |
| 1499.01 | 1499.33 | 1499.99 | 1500.84 | 1501.24 | 1503.72 |
| 1505.63 | 1506.43 | 1507.89 | 1509.10 | 1510.39 | 1520.90 |
| 1523.46 | 1526.49 | 1528.27 | 1530.62 | 1614.64 | 1633.99 |
| 1639.73 | 1645.05 | 3011.20 | 3012.47 | 3012.92 | 3016.29 |
| 3018.30 | 3019.20 | 3019.42 | 3024.21 | 3025.19 | 3025.56 |
| 3028.18 | 3032.81 | 3037.20 | 3046.74 | 3047.84 | 3048.91 |
| 3051.70 | 3054.74 | 3063.72 | 3064.20 | 3064.33 | 3065.22 |
| 3071.03 | 3071.37 | 3080.47 | 3085.87 | 3088.43 | 3093.74 |
| 3118.54 | 3121.35 | 3125.82 | 3130.90 | 3132.35 | 3135.32 |
| 3143.44 | 3152.44 | 3173.09 | 3182.16 | 3185.63 | 3199.42 |
| 3207.63 | 3223.85 | 3231.58 |         |         |         |

**Pd(APhos)**

|         |         |         |         |         |         |
|---------|---------|---------|---------|---------|---------|
| 37.66   | 60.82   | 65.48   | 72.14   | 81.27   | 102.06  |
| 113.31  | 129.86  | 130.42  | 149.27  | 175.99  | 198.73  |
| 232.60  | 239.84  | 245.96  | 255.45  | 257.42  | 268.26  |
| 283.69  | 295.97  | 298.16  | 312.79  | 318.57  | 323.35  |
| 330.57  | 339.50  | 366.70  | 380.74  | 390.82  | 410.12  |
| 415.75  | 431.69  | 438.07  | 450.98  | 480.72  | 496.19  |
| 524.86  | 546.71  | 579.60  | 599.96  | 626.81  | 655.30  |
| 733.77  | 779.46  | 817.04  | 817.29  | 818.89  | 829.29  |
| 944.09  | 945.30  | 951.65  | 956.97  | 960.76  | 966.90  |
| 972.61  | 978.59  | 980.84  | 1018.84 | 1041.43 | 1048.17 |
| 1050.47 | 1054.15 | 1094.81 | 1121.13 | 1158.38 | 1164.22 |
| 1167.01 | 1211.00 | 1212.30 | 1214.48 | 1221.71 | 1227.78 |
| 1236.41 | 1239.30 | 1245.88 | 1274.50 | 1329.34 | 1363.87 |
| 1397.27 | 1409.65 | 1412.23 | 1415.54 | 1417.44 | 1441.90 |
| 1448.43 | 1455.16 | 1475.29 | 1488.32 | 1489.62 | 1497.00 |
| 1498.36 | 1501.41 | 1502.52 | 1505.84 | 1506.05 | 1507.42 |
| 1512.85 | 1517.30 | 1522.99 | 1526.84 | 1535.03 | 1535.12 |
| 1539.46 | 1548.44 | 1559.37 | 1588.61 | 1660.11 | 2912.54 |

|         |         |         |         |         |         |
|---------|---------|---------|---------|---------|---------|
| 2922.60 | 2974.17 | 2979.07 | 3024.26 | 3026.33 | 3029.51 |
| 3030.56 | 3036.78 | 3038.84 | 3095.67 | 3097.88 | 3099.30 |
| 3101.94 | 3106.91 | 3110.05 | 3114.96 | 3120.40 | 3122.07 |
| 3122.16 | 3131.96 | 3137.38 | 3145.12 | 3157.70 | 3164.01 |
| 3211.83 | 3222.74 | 3229.09 |         |         |         |

**Pd(CatX)**

|         |         |         |         |         |         |
|---------|---------|---------|---------|---------|---------|
| 40.33   | 49.83   | 54.08   | 64.92   | 72.40   | 77.03   |
| 87.95   | 92.69   | 145.47  | 158.28  | 173.83  | 177.76  |
| 190.19  | 201.39  | 220.01  | 228.95  | 262.90  | 321.68  |
| 329.18  | 336.20  | 341.21  | 345.15  | 357.51  | 375.13  |
| 408.81  | 411.76  | 413.92  | 418.23  | 429.11  | 438.47  |
| 453.14  | 461.36  | 464.40  | 469.85  | 476.05  | 496.66  |
| 507.14  | 656.45  | 656.88  | 658.77  | 661.63  | 678.36  |
| 683.90  | 726.35  | 745.11  | 756.19  | 771.62  | 786.13  |
| 815.43  | 816.07  | 818.59  | 823.63  | 826.88  | 829.72  |
| 900.14  | 903.01  | 903.91  | 904.34  | 907.48  | 909.10  |
| 910.34  | 918.97  | 938.99  | 944.68  | 949.45  | 951.94  |
| 980.20  | 982.48  | 983.91  | 986.03  | 987.60  | 989.14  |
| 1025.91 | 1050.27 | 1053.49 | 1054.21 | 1055.74 | 1058.02 |
| 1058.65 | 1059.56 | 1061.46 | 1065.11 | 1081.16 | 1117.34 |
| 1129.63 | 1130.63 | 1132.38 | 1133.16 | 1135.18 | 1135.30 |
| 1147.31 | 1147.64 | 1158.49 | 1159.02 | 1211.66 | 1215.70 |
| 1216.44 | 1218.69 | 1238.85 | 1253.81 | 1282.60 | 1291.05 |
| 1292.05 | 1298.75 | 1317.89 | 1321.89 | 1322.46 | 1324.71 |
| 1325.46 | 1330.57 | 1332.49 | 1340.30 | 1343.77 | 1344.82 |
| 1345.86 | 1351.66 | 1355.84 | 1356.50 | 1357.50 | 1357.81 |
| 1362.31 | 1384.06 | 1384.96 | 1385.79 | 1388.48 | 1395.95 |
| 1400.39 | 1404.75 | 1405.23 | 1407.15 | 1410.56 | 1411.99 |
| 1429.91 | 1475.35 | 1494.52 | 1495.63 | 1496.61 | 1498.66 |
| 1503.28 | 1508.62 | 1509.09 | 1510.09 | 1510.59 | 1511.03 |
| 1512.61 | 1514.28 | 1514.37 | 1523.20 | 1534.68 | 1536.05 |
| 3016.17 | 3016.37 | 3017.31 | 3017.59 | 3017.86 | 3018.66 |
| 3018.74 | 3028.14 | 3029.03 | 3030.73 | 3031.21 | 3034.13 |
| 3035.58 | 3037.35 | 3039.00 | 3041.31 | 3043.51 | 3044.18 |
| 3046.84 | 3048.16 | 3050.61 | 3050.96 | 3058.57 | 3058.90 |
| 3060.41 | 3060.82 | 3063.22 | 3065.58 | 3065.82 | 3075.87 |
| 3085.30 | 3088.77 | 3095.75 | 3102.75 | 3106.02 | 3108.01 |
| 3108.74 | 3115.35 | 3119.26 |         |         |         |

**C<sub>6</sub>H<sub>6</sub>**

|         |         |         |         |         |         |
|---------|---------|---------|---------|---------|---------|
| 413.73  | 413.74  | 620.41  | 620.43  | 693.39  | 717.25  |
| 864.03  | 864.04  | 975.58  | 975.60  | 1013.71 | 1015.64 |
| 1020.08 | 1067.73 | 1067.85 | 1189.19 | 1208.43 | 1208.56 |
| 1357.61 | 1378.09 | 1523.60 | 1523.78 | 1653.97 | 1653.99 |
| 3171.42 | 3181.46 | 3181.51 | 3198.04 | 3198.17 | 3209.17 |

**3a**

|         |         |         |         |         |         |
|---------|---------|---------|---------|---------|---------|
| 25.47   | 41.26   | 52.16   | 70.96   | 147.04  | 155.91  |
| 167.36  | 183.23  | 260.90  | 283.67  | 318.84  | 344.28  |
| 358.39  | 397.40  | 411.75  | 417.80  | 451.97  | 473.20  |
| 518.62  | 617.23  | 629.58  | 634.06  | 688.78  | 699.29  |
| 711.08  | 733.54  | 751.75  | 770.74  | 798.41  | 814.99  |
| 819.04  | 864.23  | 867.78  | 902.45  | 958.11  | 960.69  |
| 963.27  | 990.51  | 994.91  | 1014.52 | 1016.23 | 1017.63 |
| 1054.69 | 1069.85 | 1084.80 | 1121.60 | 1170.19 | 1198.53 |
| 1215.88 | 1227.34 | 1243.26 | 1295.91 | 1321.53 | 1331.42 |
| 1351.88 | 1364.28 | 1373.08 | 1397.45 | 1416.91 | 1437.38 |
| 1478.82 | 1490.23 | 1491.77 | 1517.42 | 1534.44 | 1634.21 |
| 1655.97 | 1674.83 | 1710.47 | 1738.66 | 1749.26 | 3034.99 |
| 3052.87 | 3105.83 | 3154.50 | 3158.82 | 3181.58 | 3194.43 |
| 3199.43 | 3204.75 | 3218.02 | 3231.54 | 3242.49 | 3269.38 |

**R1**

|       |       |       |       |       |       |
|-------|-------|-------|-------|-------|-------|
| 10.50 | 14.60 | 28.53 | 33.77 | 36.08 | 39.54 |
| 44.48 | 45.83 | 47.94 | 55.13 | 59.09 | 61.64 |

66.53 68.25 71.62 76.35 78.18 82.59  
86.91 91.60 93.43 97.65 100.93 105.05  
109.96 120.57 127.71 138.09 149.51 155.81  
160.58 172.28 174.19 194.87 195.47 202.85  
204.47 213.32 228.79 229.20 230.02 238.86  
241.09 248.76 253.45 261.16 264.40 264.49  
267.80 273.06 281.41 289.52 293.39 295.39  
302.38 305.41 308.50 318.24 344.29 347.14  
352.67 380.04 389.74 399.58 405.68 409.32  
412.83 416.67 418.98 427.54 433.14 440.10  
446.30 450.52 453.86 461.06 472.03 488.10  
489.11 497.81 501.98 513.70 519.40 519.91  
534.93 535.58 547.47 574.76 580.18 616.69  
616.89 626.78 629.60 632.55 654.19 675.01  
677.83 686.94 711.13 716.81 718.18 727.57  
738.07 741.66 752.04 754.66 756.45 758.18  
760.90 767.10 773.48 784.75 786.93 794.55  
816.05 822.24 824.31 825.06 827.95 830.97  
858.01 859.36 859.78 866.32 867.98 868.10  
870.10 874.95 885.83 898.88 904.23 905.44  
910.06 912.04 916.16 916.95 923.45 938.65  
943.57 947.78 949.44 951.59 957.78 962.45  
964.81 967.41 968.47 971.33 974.90 976.77  
978.88 990.33 993.79 1007.03 1011.36 1012.68  
1016.55 1021.91 1026.59 1029.21 1040.92 1044.40  
1047.05 1050.55 1064.05 1065.41 1070.29 1072.98  
1083.84 1088.60 1088.82 1092.20 1092.52 1093.78  
1101.00 1101.64 1103.95 1111.23 1111.61 1112.26  
1128.63 1135.57 1144.68 1145.65 1149.83 1154.00  
1157.19 1159.96 1164.28 1167.55 1169.24 1185.76  
1191.16 1193.02 1204.59 1206.15 1208.42 1211.05  
1213.00 1215.45 1216.00 1227.80 1235.79 1243.59  
1247.44 1256.37 1270.08 1271.02 1275.34 1282.13  
1294.42 1300.39 1302.05 1306.58 1315.19 1315.69  
1316.60 1319.15 1321.26 1323.12 1330.96 1339.24  
1342.65 1347.52 1350.98 1353.33 1355.00 1362.29  
1365.88 1368.38 1369.47 1372.92 1375.69 1377.73  
1381.89 1387.99 1391.99 1393.19 1393.46 1393.90  
1394.50 1394.72 1396.84 1410.28 1411.01 1417.35  
1422.71 1424.49 1435.23 1442.92 1467.18 1469.41  
1472.24 1486.81 1491.93 1494.35 1495.83 1497.19  
1498.42 1500.33 1500.85 1501.16 1503.01 1503.77  
1504.29 1505.17 1506.54 1508.02 1509.62 1510.37  
1510.44 1512.72 1513.70 1515.33 1523.06 1527.49  
1527.85 1529.97 1531.73 1534.82 1615.86 1620.21  
1625.01 1634.56 1638.15 1640.74 1648.59 1656.45  
1751.55 3009.43 3013.92 3016.02 3017.75 3019.48  
3021.08 3023.60 3024.90 3031.37 3038.31 3040.38  
3042.91 3044.30 3045.68 3047.70 3052.54 3053.87  
3054.05 3057.62 3061.55 3067.66 3068.79 3068.88  
3072.04 3073.89 3082.41 3089.20 3092.90 3096.31  
3100.25 3115.21 3116.01 3117.89 3121.10 3127.91  
3130.38 3133.41 3135.15 3136.37 3142.15 3144.41  
3151.74 3153.39 3161.26 3161.82 3161.86 3165.50  
3168.17 3173.94 3176.66 3179.60 3181.12 3187.01  
3191.31 3191.92 3202.52 3203.89 3215.59 3226.73  
3232.38 3232.57 3253.49

**R1-TS<sub>dis</sub>**

-221.01 7.85 21.51 22.55 26.96 30.97  
36.79 39.65 40.68 43.19 45.90 54.85  
60.11 62.79 66.12 70.70 73.37 76.61  
79.96 83.93 87.77 92.17 100.68 103.04  
109.08 113.83 118.76 129.75 147.16 154.31  
159.15 163.56 168.85 181.32 191.15 193.46  
204.93 211.41 217.27 226.96 227.55 229.59  
231.60 246.83 250.73 255.19 257.05 266.31  
271.73 273.53 275.35 284.28 287.87 293.81  
302.34 306.81 310.38 317.77 341.86 347.79

351.82 354.81 380.72 395.45 397.11 408.88  
411.56 416.24 421.96 431.25 439.93 446.31  
449.64 453.88 456.20 459.89 472.76 481.72  
492.06 494.98 500.54 513.25 518.45 531.57  
534.57 540.35 544.54 573.11 581.44 586.77  
608.60 614.70 625.78 627.89 632.09 661.32  
664.15 670.92 676.96 686.70 717.81 719.85  
728.76 738.61 742.22 751.41 753.07 754.75  
758.82 762.87 772.90 775.34 783.37 795.82  
796.97 816.03 817.34 820.92 821.62 823.71  
830.28 848.45 859.94 862.23 868.54 869.32  
871.97 873.46 885.71 888.57 903.25 905.14  
909.28 913.05 915.83 917.94 923.17 942.33  
943.04 946.25 949.61 953.63 960.04 961.68  
963.31 965.12 966.06 972.71 978.23 982.89  
985.93 992.24 999.94 1000.76 1011.58 1016.15  
1018.42 1022.80 1025.70 1030.25 1035.51 1039.78  
1043.48 1045.53 1063.10 1066.32 1067.38 1068.76  
1080.82 1087.76 1088.63 1091.35 1092.02 1093.56  
1099.79 1100.34 1109.07 1109.93 1111.12 1117.79  
1129.98 1130.84 1145.30 1148.66 1149.33 1156.14  
1158.87 1164.25 1167.19 1168.11 1188.93 1190.89  
1195.61 1204.64 1205.23 1207.49 1210.16 1214.26  
1216.17 1221.07 1223.53 1228.06 1234.64 1243.66  
1246.28 1257.37 1270.08 1276.39 1278.32 1294.62  
1300.10 1302.63 1307.02 1312.67 1314.65 1315.07  
1317.04 1319.74 1325.59 1330.14 1330.85 1336.82  
1342.89 1345.75 1347.54 1354.31 1355.92 1366.26  
1367.58 1367.89 1371.09 1374.23 1375.71 1376.46  
1379.62 1384.81 1390.74 1391.06 1391.33 1393.21  
1393.99 1394.62 1398.40 1399.27 1403.11 1406.88  
1421.59 1421.96 1427.13 1434.57 1441.78 1466.16  
1472.30 1483.35 1490.38 1492.42 1493.75 1495.21  
1497.01 1499.06 1500.75 1500.89 1501.17 1502.22  
1502.60 1503.19 1504.78 1506.48 1507.69 1510.61  
1511.02 1512.12 1513.03 1514.12 1521.77 1525.88  
1527.50 1529.00 1530.27 1535.66 1614.76 1619.11  
1625.03 1633.72 1636.26 1642.98 1648.21 1656.24  
1764.80 3010.88 3013.87 3016.83 3017.76 3020.95  
3021.29 3023.51 3024.27 3026.48 3029.34 3034.85  
3042.36 3046.48 3047.50 3048.28 3052.86 3053.38  
3055.31 3059.25 3062.73 3068.02 3068.88 3069.33  
3070.98 3073.86 3077.67 3083.65 3089.96 3095.84  
3114.50 3117.91 3120.95 3120.96 3123.03 3124.58  
3131.50 3135.42 3137.83 3140.01 3143.47 3144.44  
3149.15 3150.41 3159.64 3160.40 3169.51 3170.14  
3176.56 3179.71 3186.34 3187.18 3189.49 3195.09  
3195.31 3201.39 3208.88 3209.23 3218.77 3221.60  
3232.97 3233.49 3240.74

**R2<sub>dis</sub>**

15.77 22.62 27.98 31.60 34.41 36.08  
40.48 44.90 47.09 50.34 55.73 62.89  
68.39 71.34 73.92 77.70 82.23 84.91  
87.76 92.19 98.25 103.14 107.65 112.92  
120.06 123.35 129.60 132.11 146.03 156.61  
160.66 167.14 174.36 184.19 191.68 200.65  
207.16 215.73 225.09 226.04 229.33 234.93  
238.99 249.10 251.88 266.45 270.15 272.16  
278.58 279.39 280.33 290.44 293.19 297.95  
303.15 307.70 316.38 323.39 340.26 346.22  
353.68 378.84 392.16 396.36 402.27 409.43  
414.62 415.06 422.99 424.71 430.86 440.31  
447.99 450.59 452.98 456.13 461.28 472.19  
488.38 494.87 495.80 506.63 513.69 518.79  
525.63 534.87 537.27 569.13 574.87 582.94  
605.14 608.15 625.87 627.43 630.36 649.82  
664.34 667.79 685.43 695.80 710.67 717.58  
728.34 735.66 738.07 749.01 750.97 760.73

762.14 769.27 775.31 779.86 784.43 794.38  
799.35 816.47 816.74 820.31 822.65 824.66  
828.23 839.78 858.23 860.00 866.33 869.20  
873.53 876.26 885.80 886.41 903.02 904.64  
908.29 913.98 917.10 922.79 925.58 942.95  
945.20 948.54 949.67 953.69 957.71 959.12  
962.46 964.09 965.38 970.91 977.28 984.74  
989.28 1003.92 1004.51 1009.82 1013.76 1016.45  
1023.89 1024.68 1026.88 1029.09 1039.85 1042.41  
1044.88 1048.33 1062.96 1063.65 1068.31 1078.64  
1083.65 1086.14 1088.79 1089.55 1090.34 1091.58  
1100.48 1102.55 1106.29 1107.10 1110.63 1120.89  
1131.55 1133.37 1140.64 1145.62 1148.84 1155.79  
1158.57 1162.60 1166.55 1167.16 1182.53 1190.99  
1197.77 1204.42 1205.00 1208.23 1210.95 1211.90  
1217.73 1220.36 1223.28 1230.03 1243.15 1249.90  
1266.31 1268.83 1276.66 1278.24 1290.27 1296.75  
1299.73 1302.35 1307.05 1311.24 1315.02 1316.48  
1318.44 1318.90 1326.07 1329.70 1336.21 1342.07  
1342.68 1344.32 1347.36 1355.76 1361.59 1365.12  
1366.25 1366.75 1368.66 1371.57 1375.26 1376.80  
1379.39 1386.03 1390.84 1391.45 1392.81 1393.35  
1394.39 1394.74 1401.50 1401.75 1405.08 1420.98  
1421.33 1421.97 1434.91 1446.50 1468.27 1472.58  
1482.80 1492.74 1493.35 1494.03 1498.06 1499.38  
1499.88 1500.83 1501.36 1502.37 1504.09 1505.94  
1506.43 1507.60 1508.48 1510.30 1511.07 1512.14  
1513.09 1513.42 1513.76 1524.94 1527.35 1528.46  
1530.52 1533.49 1534.05 1615.58 1620.93 1622.55  
1624.41 1636.90 1643.86 1644.28 1649.20 1655.85  
1700.21 2978.13 2980.25 3011.88 3012.22 3016.64  
3017.94 3019.37 3022.31 3022.54 3031.22 3034.41  
3041.63 3044.75 3046.29 3048.66 3050.82 3051.38  
3054.36 3055.77 3058.88 3060.47 3062.84 3065.94  
3066.96 3067.87 3073.84 3076.66 3088.52 3094.50  
3101.97 3115.08 3121.05 3124.78 3131.99 3133.57  
3138.03 3143.18 3143.65 3144.22 3145.42 3148.72  
3149.70 3156.62 3161.22 3165.59 3171.98 3175.50  
3176.51 3183.20 3185.57 3187.76 3189.32 3191.68  
3200.23 3201.25 3212.32 3221.92 3234.52 3235.67  
3238.30 3242.55 3258.91

**R2-TS<sub>dis</sub>**

-361.11 18.29 24.21 25.75 31.29 34.72  
43.48 48.04 48.80 54.35 60.46 62.02  
66.18 73.53 74.67 77.15 79.08 83.50  
83.92 96.03 101.06 106.68 109.33 113.22  
116.26 124.24 128.89 133.29 143.68 152.79  
160.71 165.83 172.82 174.56 180.42 189.73  
192.23 198.75 206.90 214.97 225.68 228.19  
230.69 236.85 248.82 254.54 267.10 268.52  
272.59 280.20 285.22 287.34 292.85 301.89  
303.68 306.83 320.61 325.43 328.40 342.83  
366.44 378.94 384.37 388.53 398.56 401.90  
403.09 419.11 430.35 432.22 433.64 436.48  
442.33 448.83 451.42 460.76 464.17 466.73  
472.73 494.21 497.04 502.81 511.80 514.80  
517.93 532.57 532.94 558.66 572.86 579.03  
586.99 607.37 625.18 628.93 631.88 640.67  
656.00 677.33 678.48 683.53 708.34 709.50  
724.17 725.47 732.20 743.64 752.51 755.76  
761.09 765.48 772.62 774.13 778.51 780.99  
801.61 815.75 819.41 820.48 822.37 823.71  
828.37 842.20 853.43 868.24 869.87 871.48  
875.10 879.37 886.08 886.76 902.46 904.24  
908.40 916.06 921.27 932.84 934.50 935.79  
943.07 944.47 949.80 954.89 957.05 957.38  
959.30 960.78 963.87 969.18 984.83 987.09  
998.77 1002.71 1005.42 1006.87 1009.84 1013.01

1016.22 1018.60 1026.53 1028.83 1036.07 1040.20  
1045.76 1051.91 1061.36 1066.36 1067.39 1068.66  
1071.48 1074.69 1078.37 1089.20 1089.44 1093.04  
1099.92 1106.78 1108.20 1111.18 1115.10 1117.48  
1128.64 1134.91 1140.80 1141.36 1150.81 1155.46  
1157.28 1161.33 1161.76 1166.47 1189.56 1193.99  
1196.66 1202.25 1204.35 1205.64 1209.35 1210.78  
1212.49 1215.77 1217.04 1226.67 1241.98 1249.67  
1260.31 1261.21 1268.65 1274.01 1282.69 1295.05  
1298.46 1302.19 1305.06 1309.01 1314.13 1315.35  
1317.30 1326.76 1329.93 1332.74 1339.84 1339.88  
1340.34 1343.45 1344.45 1357.30 1367.05 1368.14  
1368.23 1369.26 1374.72 1375.63 1379.10 1381.27  
1387.19 1390.90 1391.89 1392.62 1393.39 1393.72  
1395.70 1397.91 1399.79 1406.44 1422.56 1423.14  
1423.92 1426.80 1435.52 1445.14 1468.24 1469.12  
1480.34 1489.78 1493.65 1493.89 1498.40 1499.38  
1500.10 1500.36 1501.11 1501.51 1503.59 1505.90  
1506.61 1506.87 1507.99 1509.97 1510.46 1511.22  
1511.96 1512.22 1515.37 1520.80 1523.52 1524.94  
1526.84 1528.25 1531.66 1611.10 1613.84 1618.21  
1623.94 1628.89 1640.26 1642.02 1645.54 1646.89  
1698.74 2978.16 3010.23 3012.50 3013.82 3014.42  
3017.29 3024.15 3030.80 3030.95 3036.97 3039.85  
3040.87 3042.11 3042.38 3046.84 3049.37 3054.67  
3057.64 3060.04 3061.04 3063.30 3065.53 3067.40  
3067.98 3081.73 3084.83 3086.58 3093.94 3108.46  
3113.29 3120.61 3122.55 3126.06 3132.04 3132.34  
3136.09 3140.09 3141.23 3144.83 3146.42 3152.90  
3155.28 3157.58 3165.49 3169.89 3174.70 3175.55  
3176.38 3184.49 3187.30 3187.66 3192.11 3200.70  
3202.46 3213.91 3220.07 3226.21 3228.75 3233.85  
3234.92 3243.66 3249.21

**3b**

21.71 35.47 38.32 46.82 58.65 91.63  
122.45 151.15 152.60 168.78 199.82 242.29  
263.32 283.95 314.01 339.93 376.31 390.89  
407.76 415.79 421.95 433.80 451.03 493.55  
517.22 561.39 628.04 629.99 634.79 675.06  
683.34 694.13 705.80 708.68 725.08 759.53  
782.85 786.10 812.49 831.12 839.10 860.98  
869.09 870.41 919.52 934.95 945.92 949.43  
974.54 988.61 989.24 1006.35 1006.98 1008.20  
1010.87 1014.37 1018.45 1050.52 1057.59 1062.74  
1083.36 1091.34 1111.64 1119.03 1120.92 1131.84  
1144.57 1178.71 1196.46 1196.98 1211.07 1214.89  
1223.47 1242.01 1246.84 1260.68 1290.27 1318.49  
1344.58 1345.84 1362.40 1365.92 1368.77 1384.34  
1390.74 1406.05 1421.68 1435.00 1488.71 1488.88  
1496.30 1511.37 1517.29 1535.21 1536.00 1636.48  
1637.85 1658.78 1661.29 1734.39 1771.75 2984.11  
3035.72 3045.71 3090.56 3140.92 3148.18 3153.53  
3164.25 3178.21 3178.28 3189.23 3189.48 3199.70  
3200.32 3209.20 3211.00 3215.21 3221.65 3231.11

**RI'**

9.38 24.68 27.87 28.81 32.73 41.66  
42.89 46.35 50.37 53.91 60.19 64.36  
67.34 68.61 71.03 75.47 77.11 80.39  
84.77 90.50 92.98 98.01 100.06 105.07  
109.23 114.69 118.39 126.84 130.42 154.62  
161.75 168.33 171.79 178.67 190.72 195.87  
204.00 208.22 214.02 218.31 225.95 234.72  
235.87 242.89 244.40 256.50 257.14 261.52  
267.27 270.40 273.24 276.66 283.44 294.43  
301.35 302.66 311.64 332.13 335.17 340.74  
350.84 377.97 388.16 392.94 400.00 409.06

411.56 414.49 416.30 432.32 440.71 447.46  
450.31 461.00 464.66 468.05 475.44 483.78  
488.14 494.21 496.45 505.26 512.40 533.00  
533.66 537.09 543.69 573.07 581.73 621.28  
624.52 626.70 628.80 633.52 648.42 670.35  
675.02 688.47 712.29 714.24 717.86 721.15  
734.12 740.92 749.75 751.13 755.23 763.07  
764.09 765.89 782.86 784.13 791.01 795.05  
811.26 814.38 823.14 825.44 827.66 828.30  
852.94 858.91 861.98 862.30 864.91 868.18  
870.48 873.02 896.40 901.72 905.27 908.11  
910.08 915.92 917.87 918.53 923.79 933.08  
937.67 943.56 949.59 950.40 961.09 962.28  
967.09 970.64 973.40 974.07 978.30 978.53  
981.27 997.94 999.73 1005.12 1007.34 1014.05  
1017.34 1019.84 1025.45 1028.91 1040.87 1046.09  
1047.64 1049.29 1055.48 1062.13 1063.02 1067.16  
1081.15 1086.60 1091.69 1092.53 1093.89 1097.59  
1098.67 1103.05 1104.06 1109.82 1110.47 1116.12  
1132.35 1133.07 1144.05 1147.25 1149.30 1153.75  
1157.01 1158.42 1163.13 1166.20 1172.45 1185.17  
1193.26 1194.28 1204.51 1204.88 1209.51 1210.24  
1212.39 1219.06 1220.13 1225.30 1237.82 1239.23  
1256.33 1260.30 1263.43 1267.93 1272.28 1284.13  
1295.92 1296.42 1302.50 1307.69 1311.09 1315.64  
1320.13 1321.72 1323.79 1325.30 1329.65 1338.02  
1338.98 1339.96 1346.54 1349.10 1359.53 1359.99  
1365.93 1366.83 1366.97 1367.75 1373.31 1377.73  
1378.63 1380.93 1389.03 1391.37 1394.13 1395.44  
1395.61 1396.92 1400.98 1402.47 1404.65 1414.27  
1422.60 1426.85 1434.86 1435.90 1443.24 1464.00  
1466.67 1487.28 1491.66 1492.76 1493.21 1495.35  
1496.51 1499.61 1500.75 1501.57 1502.04 1504.17  
1504.45 1506.45 1507.15 1507.84 1509.07 1510.24  
1511.95 1512.07 1513.23 1513.95 1522.08 1529.85  
1530.53 1530.97 1532.47 1537.01 1611.22 1613.65  
1621.47 1635.45 1635.71 1640.88 1646.00 1658.71  
1828.38 2831.78 3000.74 3008.02 3009.11 3009.74  
3013.59 3022.22 3022.97 3023.72 3025.24 3038.95  
3040.95 3043.76 3043.87 3049.23 3050.25 3056.55  
3062.73 3064.90 3065.83 3071.83 3078.74 3082.42  
3086.59 3088.99 3090.85 3099.87 3109.87 3114.40  
3115.17 3115.97 3120.40 3121.19 3128.81 3130.52  
3134.06 3142.14 3144.04 3144.24 3145.33 3146.54  
3151.66 3152.93 3160.66 3160.84 3162.80 3164.72  
3171.62 3174.55 3178.25 3184.35 3186.44 3189.85  
3192.79 3194.18 3201.19 3203.01 3208.30 3218.93  
3230.21 3231.45 3249.20

RI'-TS<sub>prox</sub>

-228.59 18.09 25.99 31.50 35.80 37.23  
46.26 49.20 50.31 52.98 58.19 59.48  
67.25 70.69 72.38 73.83 78.62 80.82  
81.80 85.40 88.36 97.79 102.77 107.15  
110.07 114.25 116.94 122.49 131.91 137.64  
152.32 159.00 168.84 171.88 188.70 190.94  
203.45 207.80 212.83 214.30 225.59 228.18  
233.38 239.68 241.47 244.77 257.10 261.33  
262.70 267.37 269.00 274.32 280.88 287.34  
300.50 303.62 308.46 334.18 336.55 337.92  
350.19 357.12 387.89 389.09 393.08 402.38  
408.86 413.72 416.88 431.27 437.09 442.17  
446.46 452.72 453.46 463.34 474.33 479.14  
485.07 488.32 493.59 500.93 502.98 510.03  
527.72 530.26 535.91 572.03 574.31 581.86  
625.21 626.42 629.40 631.93 636.06 645.88  
660.47 670.69 688.49 715.94 718.45 718.90  
725.78 738.40 743.82 752.29 753.58 757.23  
759.88 765.93 780.76 781.41 785.58 792.86

794.91 807.91 811.85 823.67 825.82 827.57  
828.42 856.00 862.24 864.48 867.34 868.54  
869.63 870.06 878.28 894.32 899.35 907.26  
909.34 911.01 915.25 918.61 922.12 936.84  
938.16 943.26 944.46 949.98 951.74 963.98  
969.08 971.07 974.61 977.39 977.83 980.52  
982.51 996.18 997.15 1000.65 1006.72 1012.72  
1017.28 1020.90 1024.80 1029.59 1042.78 1045.25  
1046.68 1048.90 1060.43 1063.14 1064.85 1065.21  
1082.72 1091.13 1091.44 1092.80 1093.47 1098.24  
1098.56 1104.68 1108.52 1109.47 1112.20 1115.24  
1129.03 1134.79 1137.62 1141.61 1148.78 1154.27  
1155.72 1158.27 1159.21 1168.37 1173.27 1192.65  
1194.23 1204.24 1206.04 1209.82 1210.29 1211.16  
1211.51 1217.00 1222.61 1229.24 1235.69 1236.92  
1251.53 1262.89 1266.19 1271.76 1286.09 1297.02  
1298.03 1300.76 1307.64 1309.96 1314.83 1320.12  
1321.25 1323.33 1327.85 1329.04 1334.19 1338.53  
1341.10 1342.13 1351.41 1358.93 1360.38 1364.65  
1366.24 1368.29 1369.05 1375.53 1378.10 1379.53  
1380.01 1384.26 1388.52 1393.30 1393.93 1395.56  
1396.02 1397.81 1400.81 1403.29 1407.11 1414.74  
1423.10 1427.93 1436.02 1438.53 1464.31 1466.46  
1480.95 1488.50 1492.15 1493.71 1494.24 1494.71  
1497.38 1498.81 1500.68 1501.28 1502.33 1505.02  
1505.32 1506.68 1507.16 1507.31 1508.07 1510.03  
1510.67 1512.12 1512.89 1515.20 1521.89 1527.72  
1529.93 1530.45 1534.04 1534.41 1613.99 1615.97  
1622.08 1634.91 1638.23 1642.98 1647.06 1657.81  
1806.10 2955.31 3006.55 3008.45 3010.60 3011.28  
3014.68 3020.99 3022.42 3024.84 3033.17 3034.27  
3037.69 3040.81 3045.06 3048.78 3050.06 3054.22  
3062.85 3064.91 3065.48 3071.96 3075.96 3079.96  
3081.57 3084.14 3089.52 3096.27 3104.69 3112.23  
3114.56 3115.99 3121.24 3122.62 3129.91 3130.41  
3131.46 3135.64 3138.77 3140.74 3141.27 3151.26  
3154.02 3156.57 3160.62 3161.79 3167.34 3173.10  
3176.67 3177.03 3184.99 3186.07 3190.00 3191.17  
3192.85 3196.26 3200.40 3204.11 3212.80 3222.67  
3228.58 3248.13 3255.58

R2<sub>prox</sub>

9.59 12.14 22.09 31.55 33.06 34.26  
39.69 48.09 48.65 50.33 54.97 62.12  
64.62 67.71 73.01 74.32 77.77 80.89  
84.77 88.83 91.21 92.69 96.30 100.61  
108.51 119.67 121.74 133.18 138.66 157.49  
162.95 167.66 169.35 173.17 180.98 186.27  
194.61 205.69 219.42 221.59 231.49 233.31  
235.79 239.64 245.62 256.02 265.13 267.63  
268.79 274.23 277.58 278.81 284.89 295.12  
307.59 309.27 334.54 337.47 339.53 345.52  
349.74 373.78 382.78 391.78 396.05 400.98  
412.48 413.75 416.58 416.97 427.96 435.56  
444.27 449.16 452.55 466.62 468.97 473.62  
485.14 488.78 492.60 495.05 497.61 508.91  
521.38 524.94 531.09 568.68 584.39 597.74  
609.04 626.32 629.24 630.51 647.43 665.33  
671.43 677.38 681.10 702.72 713.27 716.75  
717.97 733.77 743.25 746.80 752.96 754.22  
762.23 766.03 776.69 782.24 785.34 800.82  
802.43 807.35 813.13 818.96 822.82 828.90  
830.13 854.20 855.19 865.61 866.30 868.40  
870.63 873.57 874.61 894.73 902.38 904.41  
910.08 911.06 914.22 918.06 919.18 937.94  
939.99 942.47 947.04 950.97 956.19 960.68  
963.08 966.94 971.21 971.75 974.98 979.63  
990.71 996.51 997.50 1009.68 1010.25 1016.56  
1019.71 1021.74 1025.17 1030.98 1042.42 1046.03

1047.90 1052.62 1062.37 1062.71 1064.91 1067.71  
1070.88 1080.36 1084.06 1090.01 1092.42 1097.09  
1098.18 1102.01 1109.73 1111.81 1112.03 1121.31  
1129.18 1130.67 1144.02 1151.60 1155.17 1156.59  
1157.89 1158.50 1162.47 1166.68 1168.51 1182.52  
1190.66 1198.06 1203.49 1205.68 1208.58 1209.75  
1213.27 1217.36 1220.30 1220.59 1239.63 1244.31  
1244.87 1258.55 1264.93 1267.95 1272.05 1299.68  
1301.40 1302.20 1308.11 1309.38 1311.80 1313.63  
1314.03 1317.06 1320.07 1322.46 1340.96 1343.21  
1344.53 1346.61 1348.77 1358.74 1360.83 1368.90  
1369.39 1370.20 1372.67 1375.21 1376.95 1381.35  
1385.05 1389.35 1391.31 1393.31 1393.85 1395.26  
1396.32 1398.92 1399.94 1401.95 1412.11 1420.53  
1422.63 1431.92 1435.03 1465.42 1467.52 1485.82  
1491.14 1492.31 1494.87 1495.24 1495.90 1497.67  
1498.47 1499.32 1500.32 1501.24 1502.40 1504.26  
1506.30 1506.99 1507.50 1508.00 1509.22 1509.96  
1512.33 1513.56 1513.67 1522.53 1524.39 1526.36  
1529.31 1532.23 1533.69 1612.83 1615.87 1619.56  
1624.25 1636.21 1645.55 1647.75 1648.45 1662.26  
1714.06 3004.31 3009.86 3011.27 3019.00 3021.33  
3024.08 3026.51 3028.18 3033.30 3033.48 3034.15  
3035.61 3035.86 3046.01 3047.61 3051.85 3052.50  
3056.55 3056.69 3063.43 3064.19 3067.46 3070.18  
3075.01 3078.97 3079.44 3091.63 3092.75 3101.11  
3114.47 3120.07 3122.17 3127.63 3129.35 3130.76  
3131.85 3131.93 3134.90 3136.98 3146.53 3155.93  
3158.42 3162.73 3175.34 3177.85 3180.48 3181.64  
3188.15 3190.11 3191.70 3193.56 3196.19 3196.62  
3200.53 3201.77 3213.69 3218.64 3223.01 3225.76  
3227.87 3231.10 3238.44

**R2-TS<sub>RE</sub>**

-227.94 2.89 12.05 23.62 35.20 38.50  
41.93 46.10 48.74 51.13 55.19 57.54  
63.82 64.69 67.21 70.69 73.63 78.20  
79.16 80.85 86.48 91.88 96.43 100.79  
102.26 109.36 119.33 130.88 133.42 142.28  
148.41 160.26 163.25 168.95 178.42 182.78  
186.08 192.50 199.10 202.58 210.06 220.47  
221.89 228.06 236.32 237.50 245.21 251.04  
256.90 263.18 266.15 273.41 275.16 283.23  
290.94 295.23 298.45 317.35 331.80 339.04  
346.59 352.93 379.06 392.34 397.54 402.89  
408.13 416.15 421.77 425.05 428.24 434.54  
436.17 446.29 447.39 449.51 457.48 458.75  
470.48 478.19 483.90 486.05 495.18 509.99  
515.18 527.57 530.46 541.98 569.76 581.85  
611.71 624.70 629.26 632.99 638.09 639.19  
649.11 680.50 681.63 700.17 710.83 714.95  
720.89 738.07 739.63 748.56 752.37 755.72  
764.43 765.01 775.67 779.08 781.92 792.93  
806.14 809.04 809.32 817.55 820.56 824.29  
825.88 839.40 854.38 858.66 862.77 865.83  
868.82 871.57 873.46 890.13 899.15 901.12  
903.71 908.07 910.24 914.00 920.25 938.93  
943.97 946.54 949.54 959.93 960.41 961.50  
961.58 964.88 968.90 971.89 973.55 978.26  
986.59 991.54 999.20 1000.57 1007.09 1010.19  
1014.76 1017.26 1017.54 1021.16 1024.37 1034.23  
1045.15 1048.48 1055.69 1055.80 1062.09 1063.86  
1064.83 1066.70 1072.97 1096.45 1096.93 1099.39  
1099.95 1100.64 1101.26 1109.72 1112.26 1117.65  
1127.48 1132.38 1134.87 1137.64 1147.56 1155.65  
1156.09 1157.90 1160.54 1165.56 1168.72 1190.63  
1196.55 1201.90 1204.79 1208.14 1209.64 1212.62  
1212.90 1216.80 1217.24 1229.94 1230.04 1239.08  
1254.52 1256.56 1274.09 1279.18 1286.59 1298.17

1299.37 1300.43 1302.43 1306.10 1310.63 1311.28  
1318.15 1320.67 1323.66 1326.01 1341.30 1341.63  
1344.51 1348.99 1350.35 1350.52 1369.66 1370.41  
1370.62 1374.62 1379.54 1381.06 1383.15 1383.91  
1389.54 1391.07 1394.97 1395.64 1396.17 1396.87  
1398.14 1401.95 1405.67 1409.26 1417.34 1422.87  
1423.61 1434.01 1434.56 1465.01 1470.33 1472.96  
1489.82 1490.72 1491.54 1493.65 1495.86 1496.55  
1497.62 1498.78 1499.42 1500.05 1501.18 1501.42  
1501.95 1503.94 1505.07 1507.50 1508.07 1508.31  
1509.53 1511.00 1520.24 1522.09 1522.54 1525.78  
1528.25 1530.60 1534.25 1608.46 1617.54 1621.13  
1633.81 1634.09 1641.31 1646.13 1654.36 1710.32  
1743.27 3008.14 3011.92 3012.38 3020.91 3024.82  
3025.74 3027.59 3029.96 3031.31 3038.60 3043.33  
3048.22 3048.73 3051.80 3056.27 3057.03 3057.51  
3061.46 3063.40 3063.79 3065.32 3068.43 3070.39  
3071.54 3073.49 3078.67 3080.76 3088.96 3091.92  
3104.49 3107.25 3116.14 3119.96 3124.69 3128.92  
3129.40 3133.60 3137.75 3139.53 3140.69 3143.55  
3144.15 3153.72 3157.48 3162.14 3168.97 3173.09  
3175.79 3184.17 3187.59 3191.92 3196.70 3198.85  
3200.17 3205.17 3212.89 3218.58 3218.66 3224.36  
3231.42 3236.68 3253.16

**3c**

26.10 32.93 38.87 53.23 66.82 78.46  
110.16 160.35 166.29 181.91 199.79 233.92  
255.36 271.63 300.20 326.78 354.69 368.66  
405.25 413.08 416.26 439.19 450.14 484.82  
494.09 535.36 598.33 625.91 632.11 634.13  
681.72 698.53 713.54 725.33 747.38 753.16  
780.75 789.67 807.93 814.68 840.75 850.69  
858.25 866.87 897.20 928.60 950.51 955.80  
959.66 973.92 992.73 995.74 1002.82 1009.15  
1010.97 1013.33 1017.77 1047.17 1059.74 1064.60  
1083.33 1088.42 1112.38 1119.69 1125.22 1132.06  
1156.83 1191.78 1196.50 1197.33 1212.73 1218.67  
1220.68 1237.28 1256.73 1272.43 1305.48 1319.02  
1348.88 1351.59 1366.41 1369.67 1371.96 1391.46  
1399.70 1405.03 1426.92 1441.52 1489.34 1496.87  
1498.09 1514.96 1522.80 1533.58 1539.43 1634.61  
1644.10 1657.14 1663.28 1724.70 1750.03 3020.72  
3053.36 3080.64 3099.33 3138.42 3139.01 3151.17  
3168.05 3173.71 3177.32 3181.25 3190.18 3190.27  
3198.79 3201.18 3207.72 3218.99 3225.51 3230.07

**R2-TS<sub>prox</sub>**

-106.78 3.35 21.56 27.53 31.38 32.07  
35.08 46.27 50.38 55.85 59.09 63.86  
66.38 71.04 75.20 78.36 83.11 86.76  
92.26 93.24 96.68 99.77 107.90 111.81  
118.12 122.95 125.05 136.08 145.43 149.55  
162.38 165.05 170.33 177.54 181.26 193.65  
207.03 209.65 214.26 221.03 225.37 229.09  
231.86 235.76 238.61 244.14 257.05 267.20  
270.81 272.16 278.60 285.73 293.52 293.84  
305.07 309.83 315.10 335.13 343.17 348.47  
355.00 370.94 381.38 390.67 401.35 407.42  
412.31 419.23 420.20 421.74 430.72 443.79  
446.43 448.20 453.70 460.92 467.39 470.99  
475.62 484.77 489.10 492.55 495.76 499.06  
506.83 513.94 531.15 537.99 557.33 573.73  
584.30 618.45 626.71 629.50 631.91 644.60  
654.36 656.91 661.48 682.75 706.00 715.13  
717.29 723.13 733.59 737.46 743.74 748.38  
754.65 756.31 761.18 778.66 782.30 785.83  
795.96 811.16 813.25 821.66 822.99 827.70

828.69 832.42 855.62 857.38 860.96 861.65  
869.74 870.04 872.98 877.51 896.54 900.80  
905.49 908.16 915.32 916.08 919.56 921.92  
939.51 944.74 951.21 956.78 959.28 961.17  
964.82 969.89 969.96 974.10 976.63 979.36  
984.94 1000.04 1000.60 1003.38 1004.36 1012.29  
1014.08 1017.74 1018.63 1021.67 1025.48 1028.63  
1032.40 1044.11 1048.33 1049.63 1053.66 1060.89  
1063.72 1064.03 1067.40 1084.68 1088.74 1092.84  
1098.10 1098.23 1102.37 1109.44 1116.62 1119.81  
1124.76 1129.74 1135.22 1143.97 1152.44 1153.10  
1156.48 1159.32 1164.22 1169.24 1171.63 1190.66  
1197.83 1205.07 1206.03 1207.13 1209.03 1210.57  
1214.16 1215.62 1226.80 1228.74 1232.86 1249.55  
1250.64 1252.22 1265.29 1272.56 1279.36 1293.08  
1297.68 1301.54 1305.11 1306.40 1306.86 1309.19  
1313.04 1320.39 1321.29 1322.44 1337.56 1339.11  
1341.98 1344.52 1346.74 1363.37 1364.88 1365.83  
1369.00 1369.19 1373.03 1376.41 1378.99 1384.04  
1389.91 1391.04 1393.63 1394.80 1395.01 1396.39  
1399.68 1402.08 1402.46 1410.27 1421.41 1422.30  
1424.33 1435.23 1436.18 1456.38 1459.81 1465.29  
1466.44 1488.97 1492.69 1494.33 1495.16 1495.91  
1499.09 1500.50 1501.39 1502.28 1502.80 1505.97  
1508.10 1508.37 1508.59 1509.22 1511.73 1511.92  
1512.75 1515.73 1518.01 1525.77 1527.90 1531.23  
1533.29 1535.11 1535.95 1613.47 1613.98 1620.07  
1631.77 1635.82 1638.31 1647.91 1652.34 1723.18  
1770.82 3002.74 3003.42 3006.09 3007.33 3010.37  
3015.84 3020.70 3024.60 3036.07 3038.86 3041.26  
3047.63 3047.74 3049.21 3049.47 3052.11 3054.92  
3057.20 3061.87 3062.05 3069.38 3093.53 3094.54  
3096.09 3099.10 3106.20 3107.61 3111.67 3118.51  
3119.47 3119.52 3124.07 3127.55 3127.68 3135.32  
3137.75 3140.28 3146.55 3151.28 3151.81 3158.57  
3165.06 3167.49 3168.77 3174.68 3178.33 3180.27  
3182.32 3184.80 3188.04 3190.43 3200.17 3200.92  
3212.62 3213.47 3220.91 3224.66 3227.67 3239.07  
3239.98 3240.97 3253.15

**R3**

10.00 16.06 17.72 20.21 29.02 31.77  
36.25 38.63 45.39 46.53 51.56 55.22  
60.92 62.99 63.67 67.05 70.29 73.88  
75.96 80.99 84.72 89.40 91.99 98.33  
104.26 121.54 126.13 127.70 136.18 146.57  
153.29 157.25 163.62 180.56 184.90 189.22  
192.68 200.18 204.16 207.65 222.08 227.07  
231.91 234.00 239.03 249.43 252.35 258.40  
263.69 268.75 272.17 273.37 277.59 290.06  
296.10 304.55 307.89 331.23 339.05 344.43  
357.87 377.38 380.06 381.31 393.40 399.61  
408.37 414.07 420.51 423.49 423.90 428.65  
437.57 446.52 448.06 451.43 457.14 467.33  
472.73 478.03 483.92 486.64 491.10 496.64  
511.63 525.00 526.46 533.31 566.84 576.73  
587.89 608.48 625.08 629.93 633.56 645.99  
656.90 669.61 685.33 690.99 699.90 716.24  
717.66 720.83 724.66 736.90 742.92 747.11  
753.92 755.31 758.26 766.16 773.34 777.10  
781.30 786.53 808.73 812.91 820.27 824.41  
827.26 828.23 835.70 857.21 863.24 866.35  
866.96 868.96 869.70 883.41 888.69 899.95  
906.87 909.44 911.93 917.97 919.66 940.02  
943.54 947.45 949.07 956.55 960.37 960.44  
960.61 963.08 965.29 972.49 972.68 979.02  
987.36 991.53 992.37 997.17 1010.01 1012.47  
1016.46 1021.44 1024.15 1024.72 1027.68 1038.51  
1040.83 1045.86 1048.34 1055.26 1057.84 1064.86

1068.41 1070.42 1078.28 1084.64 1095.21 1097.08  
1097.67 1098.16 1101.86 1105.84 1111.03 1121.46  
1123.16 1126.20 1141.78 1151.28 1152.98 1153.92  
1159.72 1162.28 1165.41 1168.22 1191.84 1195.55  
1198.72 1202.34 1204.36 1208.85 1209.74 1213.09  
1215.95 1219.81 1220.97 1236.09 1239.12 1256.67  
1267.44 1270.67 1277.06 1281.42 1296.54 1297.58  
1300.71 1305.67 1307.17 1310.58 1311.17 1312.62  
1317.96 1321.53 1326.88 1330.68 1339.24 1344.26  
1345.26 1348.71 1351.45 1352.44 1369.39 1369.88  
1371.62 1371.78 1375.99 1385.69 1387.72 1390.10  
1390.87 1391.02 1391.22 1394.73 1395.91 1396.16  
1397.69 1398.37 1400.83 1418.65 1420.54 1421.83  
1432.45 1434.14 1462.39 1465.30 1469.36 1478.81  
1490.53 1491.88 1492.97 1495.80 1497.03 1497.87  
1498.99 1499.22 1499.88 1502.32 1502.69 1503.27  
1504.94 1505.22 1506.85 1507.59 1508.11 1508.50  
1510.02 1511.59 1522.58 1523.71 1526.02 1527.66  
1528.98 1534.65 1614.92 1617.38 1618.78 1630.18  
1634.06 1637.41 1643.89 1655.74 1695.40 1723.73  
1742.18 2933.07 3003.78 3005.55 3008.59 3013.88  
3020.55 3021.88 3025.24 3028.82 3033.75 3034.74  
3037.75 3044.32 3046.40 3046.77 3046.96 3048.76  
3052.31 3058.50 3060.16 3060.73 3062.11 3062.54  
3065.06 3066.57 3072.71 3075.41 3085.01 3096.11  
3097.80 3108.85 3112.32 3118.83 3123.61 3125.92  
3127.65 3129.43 3131.22 3137.58 3138.13 3155.63  
3157.51 3165.73 3173.90 3177.95 3179.46 3183.24  
3184.64 3185.31 3185.90 3190.62 3193.81 3198.91  
3200.08 3201.20 3210.80 3215.39 3218.93 3229.26  
3232.56 3233.18 3236.93

**R3-TS<sub>RE</sub>**

-282.11 18.10 23.90 26.07 30.70 34.30  
37.03 41.66 44.88 47.69 50.83 55.27  
59.07 61.09 62.01 68.80 70.97 74.16  
77.97 81.60 83.62 91.39 92.79 97.07  
108.11 111.54 123.15 128.48 139.92 141.03  
147.38 153.58 159.14 160.11 169.10 178.82  
180.52 191.58 203.06 218.19 227.07 234.00  
240.51 241.21 246.27 254.20 261.03 262.57  
266.30 268.79 271.17 277.52 281.35 283.46  
296.60 305.77 336.74 337.24 341.27 345.74  
349.46 367.03 384.00 391.19 393.46 411.39  
414.19 418.15 420.70 427.07 430.80 435.90  
442.32 444.62 445.74 450.72 464.02 467.69  
473.26 474.61 488.34 497.87 510.87 515.89  
524.37 532.21 562.96 571.05 574.76 581.47  
596.45 625.13 630.30 632.00 636.08 648.64  
666.37 679.74 688.39 698.95 700.44 717.10  
721.17 727.23 736.87 745.87 749.47 752.42  
755.27 766.66 767.68 773.30 778.83 784.68  
799.66 805.81 808.02 812.13 822.84 826.81  
828.82 829.70 851.95 857.45 862.93 866.29  
869.52 875.60 887.09 890.22 892.78 899.56  
905.35 907.51 909.91 918.92 937.64 942.00  
944.99 948.85 951.54 955.70 959.74 961.30  
961.98 963.64 964.74 968.35 969.95 973.81  
988.22 990.98 992.13 1001.44 1006.50 1011.30  
1017.89 1018.14 1022.81 1023.38 1027.15 1037.97  
1045.96 1048.86 1055.11 1059.26 1063.01 1064.64  
1067.74 1070.44 1089.31 1090.07 1094.94 1096.66  
1101.48 1102.03 1107.91 1111.69 1117.83 1123.16  
1136.10 1149.54 1151.49 1157.40 1158.74 1159.14  
1166.99 1168.73 1183.64 1191.53 1196.92 1203.03  
1203.12 1208.02 1208.79 1210.92 1211.58 1215.08  
1216.56 1224.65 1228.72 1234.05 1254.39 1260.66  
1271.19 1273.55 1279.82 1296.95 1298.62 1299.43  
1304.99 1310.01 1311.58 1313.56 1315.32 1316.58



1320.63 1328.97 1329.82 1341.16 1345.00 1349.36  
1350.44 1352.08 1355.29 1369.46 1369.56 1370.52  
1371.38 1374.90 1376.88 1383.98 1386.67 1388.45  
1390.51 1391.87 1393.37 1394.30 1394.70 1397.24  
1400.03 1402.39 1413.79 1421.09 1421.75 1433.09  
1435.35 1443.20 1462.57 1469.12 1471.21 1490.14  
1493.04 1493.25 1493.86 1495.31 1496.66 1498.24  
1498.78 1499.48 1500.28 1500.73 1502.46 1502.87  
1504.48 1505.85 1506.63 1507.73 1508.23 1509.24  
1510.59 1520.92 1522.85 1526.56 1529.88 1531.96  
1534.24 1608.21 1616.98 1619.44 1635.05 1635.15  
1641.44 1647.94 1655.12 1705.93 1756.34 1761.98  
3007.53 3008.57 3009.91 3014.19 3016.80 3020.81  
3022.68 3025.20 3028.99 3030.46 3031.47 3038.35  
3044.06 3046.03 3047.26 3051.10 3051.54 3052.31  
3054.44 3055.53 3059.32 3062.47 3067.13 3068.24  
3070.46 3072.43 3074.88 3085.88 3086.66 3093.23  
3094.62 3103.28 3107.25 3120.39 3121.20 3126.44  
3127.95 3132.26 3133.15 3136.20 3140.14 3144.45  
3147.60 3155.24 3161.10 3173.14 3177.75 3178.37  
3182.48 3184.58 3187.85 3188.26 3191.24 3197.34  
3199.85 3206.74 3207.03 3209.55 3210.54 3213.48  
3216.61 3221.21

**3d**

15.25 22.40 35.82 37.93 51.95 58.34  
87.53 140.10 154.74 168.25 180.70 223.48  
228.46 275.79 297.46 336.18 348.71 358.80  
368.79 411.99 417.35 417.91 446.94 472.44  
496.35 541.43 582.66 595.42 629.63 633.81  
636.11 689.18 699.54 715.94 732.62 749.40  
754.94 760.54 777.40 811.54 826.33 845.46  
860.45 867.69 868.70 925.84 927.69 960.53  
968.47 973.67 978.13 994.94 996.80 999.21  
1014.33 1016.12 1017.19 1050.84 1057.94 1062.89  
1071.11 1074.55 1116.50 1120.65 1123.96 1188.86  
1195.61 1198.21 1204.91 1216.31 1217.86 1230.47  
1232.33 1257.76 1293.88 1315.64 1331.87 1343.70  
1352.17 1362.09 1363.68 1372.93 1376.87 1392.17  
1398.52 1423.22 1463.89 1490.49 1494.28 1498.57  
1507.31 1517.18 1534.77 1540.62 1634.89 1642.24  
1656.70 1664.41 1722.48 1743.52 1754.37 2990.44  
3032.24 3039.83 3047.88 3079.52 3094.94 3151.31  
3166.71 3171.09 3181.03 3182.71 3191.90 3193.54  
3204.04 3204.48 3207.52 3216.85 3227.48 3259.30

**R3-TS**

-677.00 14.05 18.16 20.54 24.06 27.83  
30.81 38.90 42.52 44.18 46.63 49.04  
53.15 57.70 59.35 65.16 67.19 71.98  
77.06 80.62 86.43 88.98 94.18 99.14  
105.99 118.79 123.38 135.81 141.58 146.27  
150.28 153.31 163.56 167.18 169.52 178.40  
188.74 192.96 197.24 208.22 214.92 221.29  
225.90 227.55 231.03 236.40 252.25 257.16  
261.04 262.35 266.49 269.71 277.78 280.82  
292.34 300.26 304.61 311.50 331.91 338.06  
344.37 365.92 372.05 382.18 392.54 401.03  
401.46 407.16 410.05 411.21 415.35 422.99  
431.02 439.55 445.49 445.94 450.60 463.01  
470.69 474.44 478.90 485.29 489.88 491.22  
496.18 509.13 524.13 532.88 556.22 574.10  
579.42 614.65 618.74 626.71 629.03 631.78  
632.50 656.65 657.88 683.88 686.78 699.79  
717.68 722.62 734.97 735.48 741.49 748.37  
752.54 755.00 762.02 764.40 766.31 770.49  
779.47 784.96 799.39 800.22 805.16 808.40  
813.48 823.17 823.97 828.53 846.69 861.14

865.37 866.83 867.12 870.22 870.65 871.39  
891.68 897.19 900.14 907.16 908.06 910.20  
913.54 917.03 937.34 943.68 944.15 949.88  
952.58 959.89 961.56 963.84 965.92 966.53  
968.85 971.83 974.59 984.87 990.66 993.76  
994.18 1011.99 1015.41 1016.18 1022.28 1022.76  
1023.42 1027.63 1037.01 1045.75 1048.79 1057.53  
1063.61 1065.64 1068.21 1083.28 1088.19 1090.76  
1094.40 1094.92 1096.27 1097.66 1102.81 1107.73  
1114.26 1122.37 1124.50 1140.05 1146.66 1152.07  
1154.01 1157.37 1167.94 1168.97 1171.51 1189.29  
1199.40 1203.54 1204.46 1208.88 1209.89 1210.49  
1218.86 1219.19 1219.64 1234.63 1238.97 1251.56  
1255.47 1271.30 1279.52 1291.28 1296.26 1297.25  
1300.08 1306.56 1308.88 1310.01 1311.15 1316.15  
1321.74 1324.81 1332.07 1333.30 1336.38 1341.93  
1347.02 1352.43 1352.90 1356.19 1369.79 1370.22  
1373.37 1377.62 1380.76 1382.23 1387.15 1388.84  
1391.74 1392.68 1393.95 1395.84 1399.31 1400.42  
1401.14 1403.21 1414.00 1420.54 1422.18 1424.05  
1434.02 1437.23 1462.33 1466.37 1471.56 1483.05  
1489.84 1490.69 1491.52 1493.78 1494.69 1495.99  
1498.75 1500.47 1501.61 1502.22 1503.93 1504.19  
1505.84 1507.31 1507.95 1508.19 1510.85 1511.59  
1516.90 1520.81 1523.68 1526.06 1527.34 1532.84  
1534.88 1535.02 1612.74 1618.45 1621.18 1634.18  
1636.10 1640.53 1645.51 1656.16 1692.89 1721.89  
1748.49 1787.53 3002.15 3006.43 3009.94 3014.57  
3014.71 3018.86 3025.06 3026.51 3029.47 3036.66  
3041.29 3046.40 3047.19 3049.66 3053.78 3055.77  
3059.19 3061.41 3061.61 3064.10 3070.15 3071.08  
3073.82 3076.82 3089.81 3102.56 3103.63 3122.22  
3122.51 3124.12 3126.86 3127.28 3129.70 3130.15  
3134.00 3135.82 3137.52 3140.93 3142.75 3148.57  
3149.14 3155.98 3159.83 3166.53 3174.47 3179.88  
3180.85 3184.80 3184.92 3192.99 3199.86 3203.33  
3206.64 3215.45 3220.34 3221.90 3222.15 3224.82  
3227.64 3230.40 3263.13

**R4**

3.23 12.61 18.06 25.09 30.45 34.24  
41.02 44.27 44.49 49.17 50.92 54.31  
60.41 64.68 70.09 71.48 75.35 77.87  
82.95 88.79 92.54 94.10 100.17 101.40  
105.35 115.22 118.43 142.73 147.53 152.59  
154.94 163.48 165.34 169.78 174.01 180.56  
185.15 194.47 199.84 206.64 220.90 224.01  
226.61 233.42 235.42 239.31 249.74 253.08  
254.20 260.57 263.15 269.68 272.56 276.54  
291.63 297.28 301.22 312.85 334.92 340.75  
346.09 368.82 373.38 383.98 389.62 392.64  
401.01 406.04 408.47 410.21 415.74 425.73  
429.11 436.46 443.44 449.84 451.96 460.79  
475.96 477.54 481.68 485.39 491.27 499.67  
510.82 524.64 533.26 534.99 573.60 582.09  
601.64 617.68 629.64 630.99 632.84 633.06  
641.93 651.50 686.58 688.10 698.70 722.49  
724.92 733.89 734.75 739.32 749.76 751.32  
752.59 758.59 765.22 766.57 771.71 778.49  
783.57 785.58 802.47 805.38 811.71 814.70  
824.18 826.53 826.81 830.71 838.22 851.06  
862.55 864.22 866.74 868.44 868.97 870.70  
890.44 901.43 906.92 910.78 911.50 914.74  
915.16 919.68 938.93 944.80 946.42 951.00  
953.54 954.83 960.60 960.82 965.78 966.39  
970.52 974.23 980.45 983.46 989.97 992.46  
994.41 1010.01 1014.87 1017.12 1020.67 1022.51  
1024.12 1030.56 1032.21 1047.11 1050.89 1057.26  
1062.95 1068.42 1068.94 1076.49 1082.57 1083.32

1088.74 1095.89 1099.55 1100.77 1102.89 1108.28  
1115.55 1122.78 1127.39 1137.59 1150.37 1154.09  
1155.70 1158.46 1163.09 1170.55 1173.12 1187.66  
1199.30 1203.05 1204.69 1209.56 1210.66 1212.80  
1216.76 1219.27 1222.44 1231.44 1241.52 1247.05  
1248.16 1269.82 1283.54 1295.37 1295.93 1297.79  
1300.73 1305.02 1306.07 1311.05 1312.12 1325.21  
1326.72 1327.88 1328.82 1333.77 1336.69 1345.97  
1352.77 1353.41 1354.47 1364.68 1369.55 1370.84  
1372.87 1373.28 1376.76 1379.67 1387.99 1390.45  
1392.37 1393.50 1393.76 1397.57 1399.77 1400.91  
1402.74 1405.32 1410.94 1421.44 1421.79 1428.37  
1434.24 1435.47 1460.25 1465.97 1476.72 1488.76  
1490.57 1491.15 1494.24 1495.81 1497.43 1499.64  
1500.71 1501.16 1501.63 1502.87 1503.92 1504.99  
1506.19 1506.34 1507.99 1509.05 1510.56 1513.02  
1518.80 1523.95 1525.85 1528.67 1529.45 1534.87  
1535.20 1600.95 1609.89 1616.32 1619.27 1633.86  
1636.32 1641.36 1646.39 1656.05 1683.58 1728.44  
1739.96 1859.66 3003.23 3006.33 3011.80 3015.25  
3020.14 3020.68 3023.15 3023.76 3025.76 3026.99  
3032.58 3034.67 3046.43 3048.55 3051.52 3052.47  
3054.05 3057.68 3061.22 3065.15 3069.07 3070.30  
3072.35 3074.25 3084.00 3107.44 3113.04 3118.82  
3120.84 3121.60 3125.07 3126.16 3128.04 3129.83  
3130.61 3134.88 3135.48 3137.58 3139.67 3143.17  
3143.25 3145.50 3156.93 3165.96 3176.22 3178.13  
3180.84 3184.17 3187.06 3193.41 3201.19 3203.65  
3214.59 3216.53 3216.70 3220.48 3223.64 3227.40  
3234.50 3268.75 3272.31

**R5**

19.33 29.22 36.38 41.42 43.16 44.54  
52.32 54.46 59.25 62.15 65.05 66.92  
76.44 82.29 85.55 87.48 97.47 108.32  
110.76 134.00 137.32 142.72 167.18 181.11  
189.05 194.32 202.71 213.09 223.62 229.01  
236.82 239.43 239.72 250.14 252.93 259.09  
261.79 268.91 278.31 293.88 303.14 332.91  
342.46 346.90 382.91 392.28 403.09 403.31  
407.52 427.31 432.57 434.98 444.01 447.71  
450.85 457.30 478.46 481.24 488.03 504.81  
509.82 530.27 534.67 570.34 582.15 614.11  
630.47 636.09 638.97 650.02 665.04 687.56  
718.83 724.67 738.24 747.05 748.33 750.10  
766.62 777.71 780.78 785.40 806.61 808.06  
813.73 823.75 826.46 830.49 849.87 862.58  
865.63 866.60 869.39 890.38 901.04 906.03  
910.14 912.04 916.08 920.18 937.57 945.07  
945.12 949.71 959.39 961.62 966.25 966.78  
972.03 979.80 993.42 996.67 1009.93 1019.43  
1024.21 1028.59 1035.89 1046.97 1050.54 1061.62  
1062.49 1067.47 1083.18 1090.16 1094.73 1098.17  
1101.39 1102.43 1109.33 1115.98 1130.18 1136.34  
1148.28 1154.96 1156.53 1158.96 1163.62 1172.19  
1188.89 1203.69 1204.54 1208.50 1209.98 1211.33  
1218.01 1225.39 1228.39 1244.48 1270.76 1285.75  
1295.17 1298.42 1299.91 1303.39 1305.11 1308.09  
1310.78 1326.53 1328.06 1329.70 1333.28 1342.90  
1350.69 1354.68 1367.27 1368.53 1368.92 1377.36  
1379.45 1387.07 1390.80 1392.73 1393.76 1396.02  
1397.35 1398.03 1399.60 1407.51 1420.21 1421.64  
1430.78 1433.34 1458.29 1467.33 1492.86 1493.50  
1493.90 1496.46 1499.02 1500.37 1500.75 1501.96  
1502.41 1503.71 1503.85 1505.02 1505.33 1506.85  
1508.82 1509.55 1510.13 1520.66 1524.11 1526.74  
1527.19 1534.06 1608.17 1616.20 1618.83 1639.04  
1641.99 1648.69 1816.16 3005.87 3008.35 3013.64  
3017.14 3020.83 3021.74 3025.88 3031.37 3033.05

3038.34 3040.29 3045.01 3045.98 3046.39 3049.84  
3052.34 3055.16 3060.45 3067.22 3069.02 3070.20  
3073.55 3075.72 3076.29 3096.07 3118.14 3120.33  
3121.17 3121.74 3125.79 3127.29 3128.58 3128.93  
3130.23 3132.08 3137.59 3144.29 3147.31 3160.28  
3177.10 3184.24 3184.66 3189.85 3201.87 3225.78  
3227.27 3230.13 3233.91

**R5'**

11.62 17.55 31.67 37.93 41.89 44.65  
53.96 58.63 61.40 63.06 66.82 71.87  
77.55 79.62 82.61 84.51 93.27 102.26  
115.79 137.02 141.11 152.00 160.15 174.11  
195.20 200.30 202.32 212.59 222.89 226.82  
231.03 234.18 245.36 247.84 253.32 255.92  
260.23 268.85 279.89 291.35 307.21 333.34  
335.85 346.01 378.62 384.52 391.66 400.76  
404.46 406.41 427.24 430.27 435.47 444.70  
447.86 456.81 471.65 473.86 482.06 484.98  
496.86 511.52 527.80 532.89 557.49 574.99  
598.68 613.82 628.21 628.96 644.65 666.01  
692.86 715.88 725.22 729.27 742.42 752.51  
754.13 771.50 773.34 778.90 780.74 803.38  
808.60 823.63 824.02 828.82 851.96 857.55  
861.64 866.02 870.47 890.39 898.51 902.56  
903.31 906.97 908.92 919.39 937.43 942.24  
947.16 949.53 956.55 962.27 962.32 965.06  
968.00 976.18 985.68 994.30 1010.11 1016.60  
1023.28 1027.16 1040.64 1045.54 1048.76 1061.34  
1064.73 1066.76 1086.37 1090.94 1095.88 1097.57  
1098.91 1101.33 1108.05 1109.56 1134.48 1138.20  
1146.23 1153.52 1157.18 1161.46 1166.37 1169.82  
1188.75 1200.84 1205.12 1207.95 1210.25 1210.85  
1212.15 1228.69 1231.16 1241.66 1262.57 1288.30  
1294.88 1295.84 1297.85 1305.04 1307.95 1309.58  
1311.09 1317.33 1327.96 1330.41 1337.75 1340.01  
1342.20 1348.21 1368.84 1369.64 1374.83 1382.06  
1382.26 1386.68 1391.50 1392.65 1393.44 1396.60  
1396.68 1397.21 1401.21 1403.78 1423.53 1425.32  
1433.24 1433.68 1462.32 1468.84 1488.11 1491.22  
1493.44 1494.94 1495.41 1498.34 1498.57 1499.78  
1501.35 1501.73 1503.39 1504.13 1506.38 1507.06  
1508.05 1509.00 1509.55 1520.14 1521.12 1522.40  
1526.98 1528.80 1614.18 1616.46 1620.86 1627.04  
1635.16 1643.46 2070.57 3011.16 3012.89 3014.52  
3017.07 3020.61 3022.42 3022.81 3031.44 3035.30  
3036.71 3038.43 3041.06 3046.39 3048.23 3049.84  
3051.40 3053.88 3064.42 3065.17 3067.65 3068.32  
3069.67 3072.95 3074.48 3085.35 3090.93 3093.11  
3099.49 3118.82 3121.58 3127.26 3129.19 3132.06  
3135.15 3142.89 3144.05 3146.67 3150.00 3163.74  
3171.51 3175.25 3185.69 3186.60 3197.20 3198.95  
3206.90 3235.30 3248.17

**R5'-Ts**

-601.42 12.10 19.28 33.76 35.92 39.43  
42.89 51.47 56.82 59.26 64.50 65.36  
69.40 73.02 76.31 79.46 85.87 90.36  
95.32 109.08 132.65 136.58 147.14 160.21  
172.71 188.63 194.22 200.76 204.77 222.11  
227.79 229.16 233.70 246.80 249.31 252.89  
261.73 263.75 271.24 274.40 290.60 303.31  
334.48 336.64 345.02 382.09 393.27 399.97  
404.33 409.18 427.40 428.69 436.01 445.88  
449.37 456.51 464.22 473.84 475.22 481.51  
485.42 495.65 512.35 529.48 534.16 563.05  
579.27 610.52 627.83 633.21 638.69 662.87  
693.28 714.47 726.25 733.28 744.76 750.37

756.67 770.32 777.45 779.06 780.96 806.46  
810.00 824.96 825.30 829.71 858.02 859.67  
861.19 866.80 871.33 891.51 899.22 904.45  
907.92 909.87 911.12 919.07 937.75 943.12  
946.75 948.97 955.60 961.62 963.19 964.73  
970.69 976.07 991.70 993.12 1010.02 1020.65  
1023.86 1027.72 1037.30 1045.11 1049.37 1063.21  
1066.52 1068.50 1077.81 1094.08 1096.80 1097.43  
1097.81 1101.78 1107.33 1109.70 1131.88 1137.85  
1150.12 1153.62 1157.22 1160.02 1166.86 1168.90  
1190.27 1200.84 1204.43 1208.48 1209.64 1209.67  
1211.25 1226.66 1227.85 1253.13 1271.04 1284.41  
1295.79 1298.13 1298.68 1305.62 1309.43 1313.49  
1315.83 1317.45 1325.10 1327.10 1338.26 1342.39  
1342.61 1349.12 1369.08 1369.66 1375.34 1381.92  
1382.59 1386.92 1390.28 1391.67 1392.26 1392.90  
1396.16 1397.70 1401.34 1404.81 1422.81 1424.96  
1433.20 1434.10 1465.19 1470.67 1492.20 1493.03  
1495.21 1495.66 1496.60 1498.45 1499.14 1499.78  
1501.07 1501.52 1504.09 1505.00 1506.32 1506.66  
1508.03 1508.31 1509.53 1504.46 1522.52 1524.96  
1527.29 1529.07 1616.36 1616.45 1623.03 1630.72  
1638.77 1645.10 1999.13 3011.47 3013.08 3014.15  
3017.33 3019.60 3020.52 3023.60 3025.51 3027.40  
3031.89 3036.75 3041.25 3044.70 3049.18 3049.29  
3050.20 3055.06 3065.82 3066.15 3067.34 3067.75  
3070.57 3072.44 3072.64 3086.63 3087.60 3090.49  
3095.05 3117.73 3123.10 3126.12 3129.24 3131.42  
3138.49 3138.68 3142.03 3153.34 3159.71 3173.85  
3174.46 3180.83 3184.92 3190.50 3193.78 3195.26  
3204.30 3227.79 3240.68

**A1**

13.42 25.01 30.05 39.19 46.44 46.51  
53.34 57.93 69.30 74.27 82.59 83.96  
94.46 98.43 102.14 113.13 117.68 123.98  
131.56 134.32 137.40 143.70 154.54 171.03  
183.15 198.85 203.38 218.68 234.80 235.18  
240.28 242.00 250.23 255.74 256.23 260.30  
265.88 273.75 276.67 285.50 290.69 296.33  
300.59 308.51 315.26 321.40 332.94 337.39  
338.71 365.09 384.15 385.87 396.35 410.83  
412.23 413.45 417.48 418.08 435.34 440.79  
455.74 459.14 484.61 496.22 501.05 503.35  
521.11 525.28 553.01 566.11 584.00 612.12  
619.32 626.45 629.15 633.31 654.83 668.61  
675.29 706.51 714.70 718.95 729.66 729.83  
750.61 760.91 762.55 779.80 785.58 808.72  
816.16 818.61 824.34 852.47 854.50 854.82  
858.31 869.37 904.09 912.15 924.14 940.39  
942.82 946.35 948.44 954.73 958.69 967.65  
971.88 973.08 983.86 984.78 989.59 990.02  
991.89 1001.39 1004.85 1006.07 1006.90 1013.55  
1018.77 1039.97 1045.71 1049.33 1051.28 1053.26  
1061.71 1065.89 1079.65 1085.22 1092.14 1095.64  
1097.17 1104.79 1110.35 1123.33 1130.83 1146.13  
1157.84 1162.02 1164.59 1176.70 1184.10 1191.24  
1197.05 1212.67 1214.04 1214.36 1216.00 1216.97  
1222.50 1227.13 1235.06 1237.73 1238.16 1241.90  
1248.84 1253.61 1264.21 1278.64 1309.48 1331.19  
1335.58 1339.82 1350.67 1352.66 1364.08 1368.12  
1368.63 1389.16 1396.78 1403.36 1412.26 1415.60  
1418.86 1419.96 1429.34 1442.88 1450.91 1456.60  
1460.61 1462.88 1476.83 1480.58 1492.96 1493.43  
1493.91 1498.22 1500.07 1504.21 1505.41 1505.79  
1506.35 1507.17 1510.52 1511.83 1512.38 1518.60  
1521.23 1524.76 1527.37 1527.96 1534.99 1538.68  
1543.49 1547.96 1561.34 1590.98 1615.66 1621.12  
1623.20 1648.76 1659.78 1815.77 2911.10 2930.19

2965.36 2990.17 3022.75 3029.66 3033.92 3037.42  
3038.44 3040.81 3042.68 3045.86 3048.78 3085.66  
3104.15 3105.97 3107.24 3107.40 3110.12 3111.23  
3115.35 3119.34 3120.78 3138.69 3138.84 3145.58  
3146.64 3148.91 3155.31 3155.63 3159.17 3160.55  
3161.47 3168.69 3175.01 3177.94 3184.51 3188.74  
3194.96 3196.36 3204.62 3205.95 3213.91 3223.06  
3223.80 3227.92 3248.13

**A1-TS<sub>dis</sub>**

-213.39 14.16 17.72 20.28 28.23 31.57  
39.76 42.68 44.05 58.59 61.72 70.92  
75.95 83.02 99.41 101.27 107.44 112.72  
123.07 127.94 132.71 145.51 149.84 152.37  
164.81 171.38 202.39 207.74 218.37 218.84  
224.91 227.21 240.46 247.69 252.35 254.39  
258.31 263.11 265.31 274.81 280.11 282.07  
295.52 305.40 312.62 318.67 333.45 336.75  
341.44 354.25 359.20 388.51 394.32 398.52  
407.49 411.94 415.27 425.71 435.91 439.79  
454.46 456.45 480.75 484.55 495.18 499.63  
523.31 530.81 539.58 550.60 582.89 583.85  
607.33 620.07 627.67 632.74 634.66 653.52  
664.09 668.74 681.14 709.83 714.51 731.24  
744.66 750.27 752.07 773.73 784.19 796.73  
813.46 817.54 818.31 820.74 836.45 849.00  
852.15 863.07 884.56 909.54 913.33 938.32  
944.95 946.72 951.68 956.01 960.09 960.61  
968.73 971.44 974.57 982.90 985.87 989.08  
991.67 993.27 997.73 1009.61 1015.85 1016.62  
1019.44 1035.30 1040.97 1046.47 1050.76 1053.90  
1063.46 1067.45 1080.82 1082.72 1086.73 1095.54  
1101.69 1109.97 1117.94 1127.31 1130.73 1146.61  
1149.14 1150.24 1173.92 1186.73 1190.62 1195.70  
1205.64 1209.64 1213.36 1217.53 1220.92 1222.50  
1224.32 1226.82 1234.66 1238.41 1242.78 1246.34  
1249.70 1256.86 1281.89 1310.76 1324.24 1330.53  
1335.97 1341.67 1352.66 1353.26 1367.96 1370.51  
1371.19 1391.52 1394.30 1398.64 1404.98 1417.51  
1419.69 1421.72 1426.63 1427.00 1450.86 1454.05  
1458.33 1463.31 1472.45 1483.76 1489.31 1492.24  
1495.00 1497.53 1497.96 1499.42 1501.83 1505.42  
1505.93 1507.72 1511.34 1514.13 1514.53 1519.74  
1521.34 1526.52 1529.13 1530.70 1536.01 1538.35  
1541.84 1547.67 1560.46 1591.94 1617.22 1623.29  
1634.97 1657.96 1662.52 1791.91 2992.32 3000.11  
3013.98 3021.35 3032.68 3035.47 3037.94 3039.47  
3043.67 3046.36 3047.60 3066.27 3070.74 3090.85  
3101.28 3104.24 3110.01 3114.35 3121.61 3126.80  
3128.77 3135.62 3144.54 3144.73 3146.61 3146.74  
3149.09 3149.64 3154.05 3156.96 3159.48 3160.93  
3164.46 3169.28 3169.64 3173.16 3177.82 3180.09  
3190.62 3193.78 3202.39 3206.68 3219.09 3227.11  
3227.86 3228.05 3232.30

**A2<sub>dis</sub>**

2.87 24.00 30.23 37.23 42.69 48.95  
52.22 55.15 60.60 67.63 73.91 78.79  
89.28 98.17 103.67 106.64 108.20 117.39  
123.01 124.55 133.34 140.56 149.85 162.10  
163.46 180.11 189.03 204.40 208.59 214.11  
217.85 228.32 233.17 236.42 242.89 252.44  
253.33 266.43 270.38 272.27 281.27 288.02  
301.79 304.46 306.77 318.58 324.97 327.63  
332.15 360.86 383.45 387.97 389.00 402.21  
406.77 414.95 421.03 422.36 432.62 437.25  
444.58 449.85 456.19 474.68 480.48 496.02  
504.08 513.69 527.33 551.14 578.03 600.01

608.80 612.73 626.10 629.91 632.35 654.67  
655.76 660.08 675.53 710.13 710.43 733.13  
733.84 748.15 772.94 782.33 784.00 787.87  
816.49 818.68 820.20 823.26 835.40 848.59  
860.82 877.25 878.59 925.25 933.12 942.98  
946.46 949.76 952.86 958.20 961.25 963.66  
972.57 978.09 978.93 982.59 996.73 997.86  
1000.55 1003.78 1008.15 1011.18 1014.70 1018.94  
1035.81 1042.88 1043.36 1051.25 1052.89 1053.33  
1056.61 1074.02 1079.02 1081.27 1087.13 1090.44  
1107.11 1115.28 1117.27 1123.49 1135.05 1146.22  
1147.56 1150.01 1173.37 1192.56 1196.76 1203.14  
1205.63 1211.60 1215.16 1217.45 1220.31 1221.25  
1225.33 1226.47 1236.63 1239.90 1246.67 1249.20  
1257.85 1281.99 1284.30 1317.79 1330.27 1333.09  
1341.32 1344.68 1359.32 1363.46 1365.42 1369.31  
1381.54 1391.98 1397.88 1409.02 1416.04 1420.37  
1423.02 1426.08 1427.24 1449.84 1452.57 1458.65  
1466.61 1471.36 1482.02 1491.85 1495.67 1496.18  
1497.32 1499.89 1500.36 1503.28 1504.97 1506.25  
1507.85 1510.30 1512.30 1513.79 1517.61 1522.81  
1524.45 1526.01 1527.12 1528.60 1537.62 1539.58  
1542.37 1558.93 1591.37 1618.24 1620.81 1622.44  
1647.32 1660.79 1686.49 1708.65 2987.94 2995.40  
2996.38 3023.82 3028.36 3030.89 3033.08 3033.51  
3035.94 3040.53 3041.31 3063.03 3065.70 3085.68  
3090.04 3105.89 3106.60 3110.41 3113.94 3118.06  
3121.31 3130.72 3140.78 3141.90 3142.24 3143.97  
3144.99 3146.61 3153.30 3155.22 3157.87 3162.07  
3166.27 3168.25 3170.48 3176.39 3186.82 3187.18  
3194.55 3200.70 3207.37 3219.45 3223.59 3223.71  
3225.41 3230.34 3245.37

**A2-TS<sub>ais</sub>**

-347.99 11.50 25.08 28.68 34.57 40.11  
45.00 46.54 53.50 57.88 61.59 70.62  
81.00 83.76 89.47 96.00 106.38 112.26  
113.13 119.10 129.55 136.32 150.03 156.00  
161.08 169.85 185.72 192.55 201.41 216.21  
220.83 225.55 235.81 240.36 244.30 250.80  
254.45 268.32 268.46 270.07 278.08 293.44  
306.52 308.38 317.19 318.01 325.80 337.07  
341.38 361.16 377.90 379.73 388.22 403.19  
411.14 415.83 423.17 426.16 430.08 433.27  
435.95 446.53 450.82 458.06 476.45 494.11  
499.04 511.83 513.13 551.81 569.81 578.23  
605.91 606.46 619.86 621.78 625.45 630.34  
646.68 651.66 679.69 710.59 711.55 724.10  
733.78 753.21 765.63 777.49 778.73 785.17  
818.77 820.91 821.79 824.65 833.06 841.50  
874.45 876.47 883.77 935.22 946.34 946.39  
949.09 950.57 958.87 961.38 963.57 965.99  
967.48 975.71 978.98 988.02 992.69 997.22  
1004.45 1006.91 1008.41 1013.49 1013.93 1015.19  
1017.34 1034.21 1043.11 1049.32 1051.73 1053.73  
1056.64 1066.52 1072.32 1080.82 1085.85 1090.87  
1108.97 1115.08 1117.05 1117.75 1134.46 1141.91  
1145.83 1150.98 1170.31 1190.63 1194.67 1196.83  
1202.87 1212.63 1215.72 1217.12 1218.39 1221.45  
1227.00 1231.21 1237.75 1239.81 1248.53 1251.84  
1259.14 1280.25 1281.61 1321.93 1330.33 1332.12  
1342.30 1345.69 1359.36 1366.90 1368.61 1369.24  
1374.72 1387.89 1393.93 1407.91 1414.34 1416.91  
1420.23 1423.75 1423.86 1447.57 1449.90 1454.77  
1467.72 1469.45 1483.00 1492.85 1494.59 1496.53  
1496.90 1498.30 1501.67 1503.02 1504.39 1508.15  
1509.59 1510.19 1511.47 1513.93 1518.90 1519.08  
1525.68 1526.34 1527.38 1530.40 1537.03 1540.74  
1543.52 1556.41 1591.52 1614.49 1623.78 1624.77

1649.73 1660.18 1661.15 1707.29 2979.51 2987.27  
2995.22 3026.65 3026.72 3028.21 3029.62 3032.50  
3036.34 3040.74 3044.97 3065.20 3067.84 3089.29  
3095.02 3095.64 3098.04 3103.37 3110.10 3124.44  
3125.79 3131.32 3131.56 3142.29 3143.86 3144.42  
3146.06 3150.35 3152.76 3153.02 3166.34 3170.85  
3175.32 3176.62 3181.61 3189.82 3190.93 3193.29  
3200.94 3211.04 3213.35 3215.35 3229.63 3231.02  
3233.00 3234.65 3255.16

**A1'**

5.53 10.69 20.09 21.46 29.39 43.56  
46.04 55.22 58.35 60.36 71.00 74.32  
81.53 82.34 87.38 94.89 107.95 113.38  
117.86 122.25 127.75 145.82 159.59 167.72  
180.71 182.41 185.74 198.84 211.33 221.78  
235.17 239.55 243.43 252.29 255.57 257.59  
265.64 272.39 273.03 283.45 289.42 294.44  
295.02 311.36 312.70 316.95 324.08 335.14  
362.97 367.52 374.86 392.01 396.55 402.49  
408.04 415.14 416.60 423.30 433.75 437.74  
458.41 476.29 479.85 490.68 496.61 502.32  
526.25 538.78 548.25 550.42 581.26 607.05  
618.15 625.30 632.47 633.01 656.98 671.69  
672.85 706.78 708.40 715.37 729.29 732.07  
749.16 764.25 767.82 782.92 796.74 811.53  
814.00 815.63 825.41 828.13 847.19 848.80  
862.84 866.13 906.61 908.40 921.74 935.75  
943.99 949.11 950.74 954.79 959.04 965.38  
965.84 968.48 976.12 977.67 979.88 990.14  
991.97 994.61 1002.28 1007.40 1013.20 1015.81  
1018.37 1041.23 1044.44 1046.00 1051.11 1053.49  
1065.19 1066.53 1079.06 1084.65 1088.68 1089.19  
1098.36 1099.89 1116.40 1118.71 1130.25 1138.34  
1153.22 1154.73 1155.45 1178.21 1181.18 1192.26  
1194.68 1208.00 1209.97 1212.37 1214.00 1216.09  
1221.75 1225.87 1236.58 1237.95 1241.24 1251.84  
1257.18 1263.78 1269.32 1277.82 1310.64 1321.24  
1336.37 1337.30 1343.92 1351.50 1358.36 1369.21  
1371.53 1376.96 1396.45 1402.29 1410.77 1414.76  
1421.09 1423.89 1428.03 1430.21 1451.18 1456.54  
1462.07 1463.93 1475.35 1487.16 1490.40 1491.78  
1494.82 1497.98 1499.78 1502.80 1503.11 1503.88  
1504.94 1505.68 1506.97 1511.41 1512.24 1517.07  
1519.53 1523.01 1531.13 1532.04 1536.42 1537.94  
1545.78 1552.60 1564.25 1591.82 1616.25 1622.98  
1635.36 1659.01 1664.48 1851.66 2814.24 2951.69  
2966.28 3020.97 3022.33 3023.63 3034.76 3037.58  
3042.09 3043.92 3044.12 3047.22 3055.26 3086.56  
3107.42 3110.04 3112.04 3114.64 3116.89 3122.64  
3127.63 3135.72 3137.64 3139.72 3141.08 3143.37  
3144.29 3147.29 3148.34 3151.37 3152.23 3157.65  
3158.48 3159.62 3169.08 3169.30 3179.15 3187.26  
3187.96 3193.57 3207.18 3214.82 3217.95 3219.95  
3220.58 3235.21 3244.04

**A1'-TS<sub>prox</sub>**

-252.73 15.72 17.52 28.07 33.55 40.30  
44.21 48.69 56.80 62.04 65.64 70.20  
79.94 91.76 93.50 96.24 98.51 105.32  
114.99 122.24 124.31 124.88 142.70 146.87  
160.31 174.88 182.26 207.96 216.61 225.40  
227.22 236.57 240.83 244.52 247.84 252.64  
259.72 261.67 265.70 277.73 281.17 283.55  
305.58 309.36 312.74 314.30 324.00 328.12  
335.98 359.13 360.67 383.65 393.44 395.60  
410.55 414.88 416.37 418.78 430.28 437.97  
455.24 467.92 477.67 482.05 485.81 497.92

503.15 520.80 539.85 548.00 562.76 585.53  
612.41 626.48 627.64 633.60 637.04 655.84  
663.64 670.54 717.03 718.07 724.52 729.56  
738.62 750.87 758.03 785.62 786.59 798.61  
813.54 817.51 818.44 823.65 836.69 854.20  
859.63 864.10 866.83 909.21 913.82 934.19  
942.97 945.89 946.16 949.48 954.89 958.92  
972.34 973.05 974.80 978.27 981.08 984.80  
989.13 994.81 998.81 1005.31 1009.12 1016.51  
1018.11 1043.26 1044.92 1045.80 1050.89 1052.93  
1060.02 1063.97 1081.27 1087.26 1087.76 1089.50  
1098.79 1107.58 1114.68 1125.06 1126.35 1135.19  
1148.35 1148.88 1154.18 1175.53 1193.12 1194.02  
1206.68 1207.87 1211.91 1215.15 1216.53 1218.38  
1222.05 1226.86 1235.07 1236.06 1241.85 1249.43  
1250.09 1266.29 1283.84 1309.17 1318.12 1333.45  
1335.79 1336.94 1351.93 1354.02 1363.55 1365.90  
1370.97 1376.02 1395.96 1396.83 1412.76 1416.02  
1419.02 1420.44 1429.07 1451.23 1454.55 1460.28  
1464.03 1470.21 1473.39 1484.26 1491.99 1492.42  
1494.06 1496.88 1499.66 1500.24 1503.67 1504.76  
1507.05 1507.58 1510.02 1511.33 1511.91 1518.47  
1521.89 1525.57 1527.17 1528.32 1533.40 1539.48  
1542.14 1543.84 1560.76 1592.54 1617.26 1623.29  
1632.60 1656.09 1661.96 1828.76 2974.23 2993.42  
3004.65 3029.87 3034.66 3036.81 3038.57 3039.42  
3041.89 3042.78 3046.53 3062.58 3064.94 3085.41  
3105.65 3106.52 3109.33 3111.27 3118.29 3119.03  
3122.46 3132.21 3133.80 3138.35 3143.53 3145.15  
3151.40 3152.98 3153.44 3155.42 3162.85 3163.83  
3168.55 3171.90 3173.04 3173.78 3178.54 3184.09  
3189.26 3194.92 3197.61 3204.08 3211.05 3217.45  
3223.28 3224.64 3237.21

**A2<sub>prox</sub>**

11.71 20.25 25.00 37.12 41.92 49.35  
54.15 58.69 67.05 71.13 78.29 84.46  
91.03 96.88 104.76 111.30 114.19 117.94  
123.87 130.48 134.96 143.63 166.87 172.22  
180.24 189.53 196.01 207.59 219.53 222.84  
226.90 233.07 234.62 247.48 256.11 261.53  
264.34 273.33 280.97 287.58 293.49 301.09  
304.16 311.49 313.84 319.25 331.46 351.42  
363.80 366.50 381.82 389.40 391.21 394.73  
409.96 414.14 417.15 425.65 435.15 437.08  
442.45 449.18 479.14 485.90 494.09 499.35  
500.95 514.46 517.08 547.56 576.97 596.14  
612.72 626.37 629.12 630.06 652.13 653.84  
669.88 686.48 698.07 716.42 720.35 732.95  
749.11 751.20 760.96 773.08 780.21 811.61  
815.45 816.53 818.84 820.08 828.13 851.62  
856.13 865.70 871.49 905.50 908.26 934.16  
942.21 947.65 950.46 955.31 959.86 964.94  
966.77 968.27 971.05 974.06 977.93 985.70  
990.63 999.57 1009.03 1013.36 1017.74 1019.75  
1020.53 1041.64 1044.52 1048.32 1051.01 1055.75  
1058.66 1060.99 1065.31 1077.60 1088.11 1093.91  
1096.09 1109.22 1125.27 1126.12 1128.28 1157.09  
1158.19 1160.22 1164.16 1168.35 1177.47 1190.89  
1198.21 1207.89 1211.87 1212.59 1213.05 1220.43  
1221.19 1228.17 1235.49 1238.29 1239.74 1247.01  
1247.57 1266.47 1274.77 1306.98 1316.06 1331.27  
1345.89 1348.08 1353.14 1360.09 1365.55 1371.19  
1372.70 1395.24 1400.59 1408.27 1414.67 1417.04  
1421.75 1423.48 1448.12 1454.23 1457.40 1464.80  
1475.91 1485.25 1487.79 1491.54 1495.10 1497.86  
1498.31 1500.76 1503.44 1505.82 1506.05 1506.44  
1506.47 1507.90 1509.96 1511.79 1516.43 1521.91  
1528.61 1529.25 1533.25 1534.83 1540.34 1545.67

1548.40 1561.07 1587.42 1615.13 1618.59 1622.69  
1645.36 1660.67 1665.33 1707.39 2917.00 2925.52  
2977.82 2979.91 3032.51 3034.67 3035.69 3036.99  
3041.07 3041.55 3042.91 3045.31 3064.07 3085.28  
3102.23 3103.22 3106.64 3109.90 3113.79 3114.13  
3119.67 3125.76 3126.95 3138.16 3141.26 3144.24  
3144.48 3156.84 3160.71 3162.04 3176.11 3178.37  
3180.54 3188.11 3188.19 3192.76 3194.52 3194.81  
3199.04 3200.41 3203.30 3212.27 3222.75 3223.89  
3232.89 3234.59 3248.12

**C1**

13.08 16.08 30.25 36.83 38.45 50.79  
54.09 57.33 60.27 66.71 67.93 70.58  
72.12 77.84 86.92 91.36 101.77 106.15  
117.00 131.49 151.25 153.61 156.36 163.78  
176.63 186.85 193.37 201.80 210.44 222.93  
229.44 241.13 244.86 256.08 270.32 273.69  
275.48 298.92 317.38 322.33 331.09 335.81  
338.49 342.07 344.27 358.01 381.62 382.29  
403.18 411.26 412.25 412.28 415.21 417.28  
421.54 422.89 435.59 440.50 453.63 459.62  
463.75 466.20 479.69 489.96 496.42 500.16  
513.33 526.87 541.99 617.25 625.28 632.11  
658.28 658.63 660.29 662.47 672.80 675.71  
683.43 688.03 712.25 714.50 718.84 726.09  
736.02 746.75 752.78 761.68 769.29 773.17  
774.50 786.12 796.51 818.69 820.03 820.59  
828.04 829.88 830.04 833.97 852.94 859.89  
863.83 868.60 895.14 901.60 902.68 904.62  
905.23 907.35 908.23 911.65 916.83 918.11  
923.23 936.00 940.10 947.71 952.49 954.87  
969.83 970.43 975.26 977.04 980.62 984.02  
985.68 986.53 988.84 989.20 992.80 995.24  
1006.80 1014.97 1016.94 1030.92 1040.72 1051.50  
1052.49 1053.71 1056.66 1059.28 1059.66 1061.37  
1061.78 1063.27 1064.24 1072.79 1084.36 1087.18  
1093.90 1094.96 1096.39 1105.93 1111.61 1120.93  
1128.78 1129.22 1131.85 1132.76 1133.80 1136.15  
1137.41 1144.37 1149.12 1150.29 1153.00 1162.98  
1166.91 1183.45 1190.58 1194.60 1209.97 1213.63  
1214.02 1217.62 1219.58 1221.67 1234.10 1241.82  
1249.32 1261.71 1263.71 1279.06 1287.85 1297.05  
1299.69 1303.09 1312.33 1320.58 1321.50 1324.60  
1326.48 1331.40 1331.92 1334.35 1337.75 1341.26  
1341.91 1346.10 1346.37 1348.30 1352.79 1354.01  
1357.78 1358.01 1358.97 1361.37 1363.61 1364.59  
1366.69 1369.92 1385.19 1386.75 1388.10 1389.82  
1390.42 1394.59 1402.71 1406.47 1407.24 1410.68  
1412.42 1414.55 1415.39 1417.16 1429.19 1464.38  
1471.05 1471.39 1487.53 1490.54 1495.37 1496.01  
1496.12 1500.95 1503.94 1505.41 1506.38 1506.75  
1509.15 1509.63 1511.28 1512.34 1512.44 1513.73  
1517.49 1522.67 1523.24 1533.87 1536.31 1544.26  
1616.99 1620.79 1635.84 1658.10 1750.65 3013.77  
3015.01 3016.91 3017.51 3018.58 3020.11 3023.89  
3028.19 3030.06 3032.85 3033.11 3035.21 3036.74  
3040.71 3041.79 3043.60 3045.59 3049.39 3050.01  
3051.08 3051.49 3055.91 3058.08 3058.92 3059.83  
3060.26 3060.82 3065.59 3067.86 3069.57 3085.18  
3089.28 3090.44 3099.98 3102.73 3107.41 3110.48  
3112.50 3116.07 3119.29 3121.01 3127.08 3140.50  
3141.98 3151.72 3151.77 3155.86 3160.86 3161.46  
3168.56 3174.27 3176.28 3178.61 3187.15 3193.86  
3193.92 3200.86 3225.25

**C1-TS<sub>dis</sub>**

-209.01 13.44 18.23 31.98 35.80 44.80

48.07 50.93 54.88 58.45 64.50 66.16  
70.30 73.55 77.29 83.18 91.30 99.21  
102.83 116.41 137.34 152.55 155.80 162.94  
174.15 182.13 188.71 202.18 207.29 216.46  
219.83 228.68 249.95 254.47 261.43 269.32  
272.14 279.05 319.46 321.70 329.97 335.69  
339.23 341.34 345.07 347.97 359.10 380.34  
397.72 410.79 411.98 412.91 414.45 416.34  
420.54 434.84 436.67 441.71 454.88 460.28  
463.73 467.98 479.67 482.87 496.00 496.93  
513.03 537.30 545.29 555.54 626.32 628.27  
631.05 657.74 658.90 660.58 663.02 668.60  
670.66 674.63 683.15 687.99 711.63 715.88  
729.26 735.34 749.90 754.35 755.73 771.99  
774.47 776.94 790.83 796.73 816.88 819.07  
819.18 820.68 826.48 829.40 832.45 851.55  
852.92 864.27 886.40 898.07 902.19 904.24  
904.85 907.14 909.81 910.47 912.81 917.48  
922.46 938.36 940.22 946.89 951.85 952.78  
961.41 966.32 978.88 980.42 983.59 984.04  
985.19 986.93 987.42 988.84 990.82 999.51  
1011.40 1016.52 1020.21 1025.38 1035.46 1042.88  
1051.52 1054.27 1055.82 1058.51 1058.97 1060.14  
1060.56 1063.04 1064.12 1066.67 1077.58 1087.64  
1092.69 1094.40 1099.32 1104.55 1116.95 1121.43  
1130.27 1130.69 1132.14 1132.77 1134.10 1136.43  
1137.20 1149.01 1149.65 1149.88 1162.92 1164.19  
1184.88 1191.95 1195.77 1213.76 1215.27 1216.36  
1217.82 1220.00 1220.52 1223.17 1242.37 1245.11  
1247.54 1257.63 1263.33 1287.08 1295.19 1299.19  
1301.49 1308.82 1315.17 1319.08 1323.11 1324.82  
1325.30 1329.22 1330.53 1333.60 1334.57 1339.49  
1341.09 1345.20 1345.73 1352.01 1353.21 1354.18  
1357.60 1358.06 1358.24 1361.58 1362.06 1365.72  
1367.19 1368.30 1382.45 1384.96 1386.62 1387.68  
1389.71 1398.51 1401.45 1405.44 1405.88 1407.88  
1408.56 1411.40 1412.34 1413.63 1422.41 1428.45  
1464.41 1471.02 1483.81 1488.94 1492.89 1495.60  
1496.24 1500.58 1502.12 1505.46 1507.64 1507.78  
1509.84 1510.60 1511.01 1511.91 1512.92 1514.46  
1515.66 1521.77 1522.05 1534.37 1536.80 1543.81  
1617.73 1623.60 1635.02 1658.07 1776.64 3013.62  
3016.31 3018.02 3018.77 3018.91 3019.33 3024.39  
3031.75 3032.22 3035.87 3036.89 3037.95 3042.48  
3042.85 3043.70 3044.01 3045.79 3046.17 3050.34  
3051.42 3053.57 3055.08 3056.62 3060.01 3061.13  
3061.18 3065.02 3066.23 3069.22 3073.31 3085.49  
3092.72 3093.49 3094.36 3095.32 3102.42 3109.21  
3111.29 3112.04 3113.79 3121.34 3126.80 3131.89  
3141.37 3143.02 3148.95 3156.60 3159.37 3164.82  
3170.43 3179.81 3180.52 3189.63 3190.41 3198.62  
3199.75 3220.60 3226.45

**C2<sub>dis</sub>**

19.82 28.94 35.43 35.53 44.46 48.97  
55.18 58.81 65.01 65.88 74.78 79.00  
85.14 90.61 103.28 104.99 110.81 117.97  
120.92 132.14 143.56 152.05 164.98 168.53  
175.58 178.37 186.27 199.12 199.62 210.69  
214.97 224.19 245.44 257.54 273.11 280.26  
288.59 300.48 305.11 309.45 319.63 322.36  
325.79 342.16 344.34 357.37 383.03 388.91  
406.70 410.37 412.67 413.14 416.75 417.40  
423.35 427.35 438.76 440.59 449.53 451.83  
458.21 460.25 465.58 482.68 483.36 499.75  
504.00 521.26 525.37 606.13 610.81 623.83  
633.04 652.80 656.22 657.01 658.55 661.74  
663.46 664.73 681.44 687.08 689.69 714.54  
716.35 735.83 750.01 750.68 768.52 769.84

775.14 784.56 786.11 792.03 816.20 819.02  
819.40 825.65 826.08 831.69 837.89 846.54  
866.39 878.33 883.00 888.97 898.18 902.50  
905.73 908.58 909.01 911.30 918.74 925.41  
933.40 936.66 947.08 948.71 953.62 964.20  
966.52 980.65 983.49 984.23 986.03 987.35  
989.38 992.40 996.88 1007.47 1008.60 1010.17  
1014.87 1015.49 1018.58 1036.24 1041.38 1050.59  
1052.91 1053.52 1057.47 1058.36 1059.58 1061.92  
1062.21 1065.19 1065.68 1076.28 1081.20 1082.34  
1085.90 1091.57 1100.80 1101.22 1115.81 1119.60  
1129.51 1132.09 1132.24 1134.28 1135.36 1136.30  
1139.26 1145.41 1149.49 1154.35 1159.69 1164.61  
1192.25 1196.27 1198.65 1213.47 1215.25 1215.86  
1218.18 1219.02 1220.31 1220.94 1227.27 1243.37  
1249.15 1260.32 1281.67 1284.38 1285.61 1296.14  
1299.54 1299.87 1315.36 1322.61 1325.66 1327.59  
1329.34 1329.84 1330.72 1332.88 1334.54 1337.34  
1341.55 1342.73 1345.31 1346.03 1354.03 1356.61  
1357.18 1357.91 1358.91 1360.48 1360.93 1362.74  
1366.02 1380.63 1384.38 1385.88 1386.79 1389.38  
1395.16 1399.78 1402.87 1405.00 1407.75 1408.49  
1409.13 1412.11 1413.42 1425.63 1434.80 1466.17  
1473.18 1484.91 1486.82 1491.61 1493.37 1495.08  
1496.59 1497.70 1505.74 1506.66 1508.40 1509.31  
1509.93 1510.22 1511.97 1512.47 1513.45 1513.57  
1515.34 1524.43 1530.36 1533.73 1537.28 1617.56  
1618.27 1629.00 1652.81 1682.74 1705.93 2857.69  
2990.92 3014.90 3015.57 3016.45 3016.73 3022.02  
3022.76 3024.55 3028.79 3033.10 3034.45 3035.13  
3036.53 3041.20 3041.62 3042.11 3042.36 3044.60  
3047.82 3049.62 3051.51 3056.25 3056.96 3057.47  
3057.61 3061.47 3061.75 3062.76 3074.21 3076.00  
3078.56 3081.59 3086.01 3086.02 3089.10 3101.41  
3106.53 3110.14 3114.30 3118.95 3135.69 3141.64  
3149.75 3151.56 3160.51 3167.66 3168.53 3175.27  
3182.65 3186.78 3188.40 3195.95 3199.83 3204.56  
3225.57 3230.62 3252.02

**C2-TS<sub>dis</sub>**

-353.22 17.33 28.26 37.40 38.97 44.32  
49.38 51.09 58.90 62.16 64.31 72.68  
74.54 84.41 89.29 101.06 106.43 111.13  
112.95 128.32 138.36 152.09 156.72 169.97  
173.16 178.04 186.31 188.83 195.18 203.84  
207.43 221.18 224.58 229.96 231.26 268.06  
272.70 279.52 306.80 318.88 325.92 327.06  
336.54 340.69 343.16 358.40 374.44 381.02  
400.63 408.06 409.63 413.81 419.21 419.93  
427.12 432.23 434.28 435.38 446.20 452.09  
460.28 461.69 463.82 473.48 474.30 495.64  
503.25 508.43 513.39 569.74 606.60 622.96  
630.11 634.82 654.68 656.71 658.45 660.02  
661.89 673.11 678.91 685.60 710.02 711.06  
718.54 734.04 747.92 755.00 762.70 765.32  
769.63 777.67 780.83 788.74 816.71 817.40  
819.10 822.24 823.19 831.43 835.59 842.52  
873.52 875.75 881.81 901.03 903.68 904.31  
908.63 909.67 910.50 914.52 922.43 932.10  
938.50 944.06 945.82 949.87 951.21 960.51  
961.01 981.23 983.91 984.21 987.68 989.20  
990.14 994.70 1000.18 1000.51 1005.86 1007.47  
1009.65 1012.97 1015.25 1026.28 1036.03 1048.23  
1051.98 1054.37 1057.07 1057.87 1058.79 1060.70  
1061.73 1063.20 1065.29 1066.23 1070.69 1080.49  
1087.55 1090.07 1107.86 1116.23 1117.21 1118.96  
1130.87 1131.22 1133.32 1134.55 1135.00 1135.28  
1136.44 1142.09 1148.73 1149.72 1160.62 1163.48  
1191.90 1193.57 1197.65 1212.91 1214.86 1217.64

1218.34 1218.87 1219.76 1226.33 1242.22 1249.69  
 1255.39 1259.74 1278.92 1285.66 1295.10 1296.81  
 1301.26 1321.41 1323.88 1325.44 1326.09 1328.50  
 1329.44 1330.32 1332.57 1335.58 1340.10 1341.29  
 1343.04 1344.97 1345.99 1353.64 1355.28 1357.79  
 1357.87 1357.96 1358.24 1359.16 1364.75 1366.59  
 1368.10 1375.80 1384.41 1386.19 1387.12 1388.62  
 1394.03 1400.30 1404.47 1407.36 1408.00 1408.24  
 1408.89 1410.72 1412.27 1422.84 1429.61 1467.68  
 1475.68 1480.58 1494.23 1494.65 1497.05 1498.17  
 1499.81 1506.38 1506.45 1508.69 1509.89 1510.99  
 1511.38 1511.73 1512.87 1513.21 1514.25 1514.51  
 1518.08 1523.13 1523.41 1536.16 1539.23 1613.35  
 1619.52 1623.24 1645.14 1664.88 1690.87 2981.40  
 3012.18 3014.48 3014.66 3016.79 3018.70 3019.60  
 3021.22 3023.17 3026.77 3029.82 3032.85 3033.86  
 3035.54 3036.57 3037.54 3040.41 3042.38 3044.23  
 3044.85 3048.45 3054.36 3056.30 3057.18 3057.89  
 3059.57 3060.70 3062.03 3063.36 3069.45 3071.50  
 3080.25 3081.19 3087.92 3089.24 3100.72 3100.90  
 3105.31 3105.86 3106.71 3108.99 3114.77 3131.44  
 3143.62 3152.06 3153.22 3166.37 3169.59 3174.44  
 3177.93 3189.40 3194.80 3202.34 3212.41 3218.90  
 3227.85 3233.03 3250.16

**C1'**

15.28 20.11 27.75 34.32 40.62 46.97  
 50.89 52.31 54.89 60.33 63.04 64.17  
 70.26 78.68 83.41 85.82 94.92 98.18  
 99.68 106.04 118.48 155.01 157.46 168.82  
 176.43 183.47 186.16 194.36 208.74 222.04  
 225.82 233.70 245.69 248.00 258.40 271.63  
 272.26 294.50 314.42 318.43 331.23 335.31  
 336.07 341.99 344.56 357.74 376.95 379.53  
 408.03 409.00 412.73 414.12 416.55 419.75  
 420.96 433.93 440.56 452.78 458.58 462.93  
 466.17 476.80 479.28 485.24 496.87 497.61  
 512.17 538.40 544.74 618.19 624.91 633.55  
 656.98 658.67 659.28 663.37 669.19 673.03  
 681.66 686.83 707.76 713.14 718.11 729.78  
 732.69 749.10 753.10 764.08 767.40 770.02  
 774.12 788.88 796.35 817.62 818.49 819.72  
 825.77 826.40 826.86 831.26 848.02 855.39  
 865.32 868.62 893.82 902.73 904.37 905.26  
 908.18 909.21 910.00 911.40 917.81 921.79  
 923.04 938.50 940.10 946.38 951.19 953.58  
 965.86 970.24 976.16 979.44 981.19 982.57  
 985.05 985.59 988.24 990.36 993.82 1002.09  
 1004.11 1013.11 1017.07 1028.90 1039.45 1045.02  
 1051.07 1052.46 1055.68 1057.00 1057.70 1060.06  
 1060.63 1061.39 1064.06 1066.97 1079.15 1083.15  
 1090.26 1092.96 1097.82 1098.06 1115.95 1121.07  
 1128.85 1131.65 1132.23 1132.52 1134.34 1136.00  
 1136.80 1139.63 1149.20 1150.03 1154.92 1163.96  
 1165.55 1177.74 1193.04 1194.81 1211.31 1213.67  
 1217.64 1219.69 1221.56 1222.29 1237.76 1246.53  
 1250.48 1262.46 1263.71 1268.86 1287.82 1295.92  
 1299.85 1302.19 1308.46 1319.37 1320.75 1323.72  
 1325.08 1330.24 1330.64 1333.93 1335.38 1337.64  
 1340.47 1344.45 1345.44 1345.95 1349.21 1353.75  
 1357.23 1357.67 1358.11 1358.26 1360.50 1363.74  
 1368.34 1369.54 1376.87 1384.50 1386.15 1387.43  
 1389.70 1396.57 1401.71 1405.02 1407.35 1410.83  
 1411.06 1411.42 1413.16 1415.01 1428.12 1429.77  
 1462.51 1470.87 1486.73 1489.24 1491.79 1495.84  
 1497.10 1500.68 1503.82 1504.36 1505.16 1505.84  
 1509.40 1510.00 1511.52 1511.93 1512.31 1513.18  
 1516.11 1522.21 1523.00 1533.57 1538.30 1545.66  
 1614.44 1620.20 1635.29 1658.66 1851.53 2796.33

3015.02 3015.99 3017.86 3020.18 3020.41 3021.25  
 3025.79 3026.43 3030.72 3032.88 3033.54 3036.40  
 3039.36 3042.71 3043.74 3044.76 3047.58 3049.45  
 3051.80 3053.72 3056.28 3057.58 3061.70 3061.83  
 3062.74 3063.31 3065.22 3067.77 3077.94 3086.50  
 3087.61 3089.58 3098.12 3102.85 3103.69 3104.90  
 3106.32 3110.87 3118.45 3121.88 3125.67 3134.25  
 3134.97 3146.01 3148.13 3150.98 3157.42 3160.60  
 3165.46 3171.16 3175.79 3179.14 3184.50 3194.48  
 3196.41 3209.41 3219.67

**C1'-TS<sub>prox</sub>**

-233.80 11.06 22.04 31.22 33.27 42.93  
 48.38 53.47 56.40 60.21 63.24 63.89  
 68.23 76.74 78.50 91.04 94.75 99.81  
 105.81 107.58 124.62 133.19 154.31 160.92  
 174.88 181.78 183.62 188.19 204.55 220.06  
 225.64 230.31 241.13 245.93 253.07 267.01  
 272.20 284.23 310.75 317.79 330.82 332.22  
 334.47 341.89 343.24 359.14 363.65 380.21  
 394.32 409.72 412.05 414.22 415.36 416.07  
 421.00 434.81 437.95 453.48 459.13 462.93  
 465.77 476.24 477.79 481.53 495.46 498.53  
 508.14 513.30 538.25 567.73 627.14 627.22  
 636.91 657.97 658.29 659.93 661.06 664.81  
 669.00 683.10 687.87 715.68 716.65 724.55  
 729.91 738.50 748.57 752.73 757.02 771.58  
 773.34 787.91 789.37 799.03 818.31 818.74  
 819.37 822.42 826.77 828.13 832.73 855.35  
 859.34 864.19 867.87 897.50 901.36 904.09  
 904.47 909.12 910.89 911.37 913.06 914.06  
 922.75 936.59 939.52 946.73 947.54 951.48  
 953.33 972.91 976.87 980.47 983.06 983.63  
 984.36 986.51 988.11 990.71 993.35 1000.58  
 1005.13 1007.71 1016.83 1028.32 1040.81 1044.16  
 1051.50 1053.16 1055.30 1058.09 1058.31 1059.60  
 1060.54 1061.93 1063.84 1064.76 1081.65 1085.91  
 1089.91 1092.93 1097.37 1104.79 1116.74 1120.82  
 1124.32 1129.98 1131.68 1132.90 1132.96 1133.91  
 1136.15 1137.22 1149.28 1151.30 1153.11 1163.01  
 1164.84 1191.46 1195.63 1207.50 1213.93 1215.75  
 1217.76 1219.82 1221.16 1221.97 1235.06 1246.74  
 1247.27 1262.50 1265.47 1287.03 1296.08 1298.62  
 1302.07 1306.78 1319.70 1322.00 1323.78 1326.02  
 1329.09 1329.47 1331.18 1333.66 1335.34 1336.71  
 1340.78 1345.37 1345.81 1350.21 1352.38 1353.85  
 1357.67 1358.08 1358.66 1360.94 1361.28 1363.66  
 1366.96 1367.44 1377.17 1384.79 1386.45 1387.15  
 1390.01 1396.72 1400.89 1405.11 1407.35 1410.38  
 1411.04 1411.72 1412.55 1413.44 1429.17 1462.21  
 1471.08 1471.23 1484.95 1491.79 1492.34 1494.82  
 1496.74 1499.69 1503.67 1505.30 1507.11 1507.23  
 1509.10 1510.95 1511.14 1511.38 1512.34 1512.75  
 1516.35 1518.43 1522.72 1533.39 1535.14 1539.49  
 1614.52 1621.43 1632.32 1656.04 1831.48 2978.71  
 3015.85 3017.65 3018.09 3018.42 3020.37 3023.23  
 3024.44 3027.10 3031.59 3032.74 3034.67 3037.78  
 3039.97 3041.77 3044.16 3045.72 3047.57 3048.77  
 3051.08 3052.16 3058.69 3059.11 3059.29 3060.48  
 3063.28 3063.54 3067.73 3068.82 3070.53 3084.91  
 3086.36 3088.29 3091.42 3103.10 3106.86 3109.33  
 3110.61 3110.96 3117.82 3119.66 3121.18 3133.75  
 3134.17 3150.82 3151.15 3157.93 3165.69 3165.93  
 3171.32 3171.67 3175.65 3176.64 3184.26 3196.14  
 3196.95 3210.48 3219.64

**C2<sub>prox</sub>**

16.08 23.35 26.49 38.12 44.22 45.36

52.30 60.08 64.58 65.91 68.55 75.11  
81.49 83.84 89.77 93.66 111.37 114.48  
121.53 126.57 132.29 153.64 166.03 168.55  
178.03 179.20 184.11 186.48 193.53 211.92  
220.43 223.88 236.95 241.14 254.10 271.08  
276.37 291.94 310.55 315.46 318.76 336.69  
340.49 344.14 355.85 361.68 374.90 378.78  
390.65 404.34 411.40 412.11 415.12 415.88  
420.62 425.22 429.69 431.27 449.03 457.55  
462.95 469.25 480.53 486.61 490.68 496.34  
498.57 502.09 514.26 605.82 622.00 626.96  
646.67 654.94 656.25 657.33 664.02 664.83  
670.27 680.67 684.40 696.25 714.45 718.08  
727.35 740.18 745.18 752.26 760.89 766.15  
766.72 771.04 779.22 805.92 813.12 815.93  
817.11 820.19 823.49 824.71 828.08 849.38  
860.67 864.10 869.70 899.51 903.26 903.99  
904.89 907.42 908.57 911.50 913.03 916.88  
919.33 932.98 938.25 947.16 950.13 952.52  
966.20 968.01 977.16 980.44 982.21 985.68  
987.36 988.74 989.81 992.66 999.34 1004.77  
1008.90 1013.86 1016.17 1021.15 1041.12 1047.16  
1049.00 1052.96 1053.79 1056.49 1057.94 1058.77  
1059.11 1060.16 1060.71 1063.26 1063.85 1076.30  
1079.40 1087.50 1095.91 1107.81 1118.65 1121.64  
1126.85 1131.38 1132.76 1133.64 1134.87 1136.80

1140.73 1149.69 1150.91 1154.09 1159.53 1160.52  
1164.54 1176.72 1190.87 1199.48 1212.58 1213.09  
1217.77 1218.48 1219.96 1220.98 1238.10 1239.53  
1244.89 1250.32 1265.69 1285.27 1293.79 1295.84  
1301.61 1307.42 1316.61 1318.71 1322.03 1326.21  
1327.26 1328.55 1333.39 1337.60 1340.38 1343.11  
1344.75 1345.27 1347.09 1349.02 1353.25 1354.41  
1357.66 1358.63 1358.98 1360.16 1360.70 1362.68  
1372.54 1373.48 1384.45 1386.00 1387.84 1388.84  
1396.03 1400.06 1403.22 1407.43 1408.44 1409.72  
1410.48 1411.40 1412.12 1430.30 1464.76 1475.67  
1485.33 1489.19 1496.40 1497.10 1497.80 1497.89  
1499.77 1505.04 1505.94 1506.33 1510.32 1510.74  
1510.87 1511.23 1513.65 1513.96 1514.64 1517.01  
1517.58 1525.41 1532.62 1536.82 1539.33 1614.53  
1615.63 1620.73 1645.45 1662.63 1713.35 3011.26  
3012.74 3013.69 3014.07 3014.90 3021.66 3022.71  
3027.85 3027.89 3031.20 3031.95 3032.79 3033.95  
3037.74 3039.18 3039.89 3040.52 3041.63 3043.18  
3044.77 3046.86 3048.42 3051.57 3055.60 3055.77  
3056.83 3059.61 3060.08 3060.35 3065.14 3073.83  
3084.50 3086.73 3089.56 3093.63 3098.07 3103.30  
3106.06 3124.40 3129.55 3130.90 3138.12 3145.24  
3156.19 3158.05 3164.38 3173.82 3178.48 3182.53  
3191.05 3195.92 3197.08 3200.39 3205.51 3206.43  
3217.66 3230.42 3239.96



## Computational References

- (1) Parr, R.G.; Yang, W. *Density Functional Theory of Atoms and Molecules*. Oxford University Press: New York, **1989**.
- (2) Bochevarov, A.D.; Harder, E.; Hughes, T. F.; Greenwood, J. R.; Braden, D. A.; Philipp, D. M.; Rinaldo, D.; Halls, M. D.; Zhang, J.; Friesner, R. Jaguar : A high-performance quantum chemistry software program with strengths in life and materials sciences. *Int. J. Quantum Chem.* **2013**, *113*, 2110.
- (3) Slater, J. C. *Quantum Theory of Molecules and Solids, Vol. 4: The Self-Consistent Field for Molecules and Solids*. McGraw-Hill: New York, **1974**.
- (4) Vosko, S. H.; Wilk, L.; Nusair, M. Accurate spin-dependent electron liquid correlation energies for local spin density calculations: a critical analysis. *Can. J. Phys.* **1980**, *58*, 1200.
- (5) Becke, A. D. Density-functional exchange-energy approximation with correct asymptotic behavior. *Phys. Rev. A* **1988**, *38*, 3098.
- (6) Lee, C.; Yang, W.; Parr, R. G. Development of the Colle-Salvetti correlation-energy formula into a functional of the electron density. *Phys. Rev. B* **1988**, *37*, 785.
- (7) Becke, A. D. Density-functional thermochemistry. III. The role of exact exchange. *J. Chem. Phys.* **1993**, *98*, 5648.
- (8) Grimme, S.; Antony, J.; Ehrlich, S.; Krieg, S. A consistent and accurate ab initio parametrization of density functional dispersion correction (DFT-D) for the 94 elements H-Pu. *J. Chem. Phys.* **2010**, *132*, 154104.
- (9) Ditchfield, R.; Hehre, W. J.; Pople, J. A. Self-Consistent Molecular-Orbital Methods. IX. An Extended Gaussian-Type Basis for Molecular-Orbital Studies of Organic Molecules. *J. Chem. Phys.* **1971**, *54*, 724.
- (10) Hehre, W. J.; Pople, J. A. Self-consistent molecular orbital methods. XIII. An extended Gaussian-type basis for boron. *J. Chem. Phys.* **1972**, *56*, 4233.
- (11) Binkley, J. S.; Pople, J. A. Self-consistent molecular orbital methods. XIX. Split-valence Gaussian-type basis sets for beryllium. *J. Chem. Phys.* **1977**, *66*, 879.
- (12) Hariharan, P. C.; Pople, J. A. The influence of polarization functions on molecular orbital hydrogenation energies. *Theor. Chim. Acta* **1973**, *28*, 213.
- (13) Hehre, W. J.; Ditchfield, R.; Pople, J. A. Self—Consistent Molecular Orbital Methods. XII. Further Extensions of Gaussian—Type Basis Sets for Use in Molecular Orbital Studies of Organic Molecules. *J. Chem. Phys.* **1972**, *56*, 2257.
- (14) Francl, M. M.; Pietro, W. J.; Hehre, W. J.; Binkley, J. S.; Gordon, M. S.; DeFrees, D. J.; Pople, J. A. Self-consistent molecular orbital methods. XXIII. A polarization-type basis set for second-row elements. *J. Chem. Phys.* **1982**, *77*, 3654.
- (15) Hay, P. J.; Wadt, W. R. Ab initio effective core potentials for molecular calculations. Potentials for the transition metal atoms Sc to Hg. *J. Chem. Phys.* **1985**, *82*, 299.

- (16) Clark, T.; Chandrasekhar, J.; Spitznagel, G. W.; Schleyer, P. von R. Efficient diffuse function-augmented basis sets for anion calculations. III. The 3-21+G basis set for first-row elements, Li–F. *J. Comput. Chem.* **1983**, *4*, 294.
- (17) Frisch, M. J.; Pople, J. A.; Binkley, J. S. Self-consistent molecular orbital methods 25. Supplementary functions for Gaussian basis sets. *J. Chem. Phys.* **1984**, *80*, 3265.
- (18) Krishnan, R.; Binkley, J. S.; Seeger, R.; Pople, J. A. Self-consistent molecular orbital methods. XX. A basis set for correlated wave functions. *J. Chem. Phys.* **1980**, *72*, 650.
- (19) McLean, A. D.; Chandler, G. S. Contracted Gaussian basis sets for molecular calculations. I. Second row atoms, Z=11–18. *J. Chem. Phys.* **1980**, *72*, 5639.
- (20) Marten, B.; Kim, K.; Cortis, C.; Friesner, R. A.; Murphy, R. B.; Ringnalda, M. N.; Sitkoff, D.; Honig, B. New Model for Calculation of Solvation Free Energies: Correction of Self-Consistent Reaction Field Continuum Dielectric Theory for Short-Range Hydrogen-Bonding Effects. *J. Phys. Chem.* **1996**, *100*, 11775.
- (21) Friedrichs, M.; Zhou, R. H.; Edinger, S. R.; Friesner, R. A. Poisson–Boltzmann Analytical Gradients for Molecular Modeling Calculations. *J. Phys. Chem. B* **1999**, *103*, 3057.
- (22) Edinger, S. R.; Cortis, C.; Shenkin, P. S.; Friesner, R. A. Solvation Free Energies of Peptides: Comparison of Approximate Continuum Solvation Models with Accurate Solution of the Poisson–Boltzmann Equation. *J. Phys. Chem. B* **1997**, *101*, 1190.
- (23) Rashin, A. A.; Honig, B. Reevaluation of the Born model of ion hydration. *J. Phys. Chem.* **1985**, *89*, 5588.
- (24) Seeman, J. I. Effect of Conformational Change on Reactivity in Organic Chemistry. Evaluations, Applications, and Extensions of Curtin-Hammett Winstein-Holness Kinetics. *Chem. Rev.* **1983**, *83* (2), 83–134.
- (25) Seeman, J. I. The Curtin-Hammett Principle and the Winstein-Holness Equation: New Definition and Recent Extensions to Classical Concepts. *J. Chem. Educ.* **1986**, *63* (1), 42.
- (26) Wang, D.; Miao, L.; Feng, L.; Yao, Q.; Mkrtchyan, G.; Crowe, W. E.; Nesterov, E. E.; Wang, Y.; Zhang, X.; Yu, P. Mechanism and Origin of Stereoselectivity in Robinson Annulations Leading to Bicyclo[3.3.1]Nonanes: A Rare Curtin–Hammett Scenario. *J. Phys. Org. Chem.* **2017**, *30* (1), e3595.
- (27) Morokuma, K. Molecular Orbital Studies of Hydrogen Bonds. III. C=O···H–O Hydrogen Bond in H<sub>2</sub>CO···H<sub>2</sub>O and H<sub>2</sub>CO···2H<sub>2</sub>O. *J. Chem. Phys.* **1971**, *55* (3), 1236–1244.
- (28) Ziegler, T.; Rauk, A. On the Calculation of Bonding Energies by the Hartree Fock Slater Method. *Theor. Chim. Acta* **1977**, *46* (1), 1–10.
